# Supplementary material for: Genome-wide meta-analysis identifies 127 open-angle glaucoma loci with consistent effect across ancestries
Source: Nat Commun. 2021 Feb 24;12:1258. doi: 10.1038/s41467-020-20851-4 (PMC7904932; doi:10.1038/s41467-020-20851-4)
Supplement: Supplementary file 4 — Supplementary Data 1-25 [file 41467_2020_20851_MOESM4_ESM.xlsx]

## Sheet: Supplementary Data 1
Study	N cases POAG	N controls POAG	Age (mean ± SD) cases	Age (mean ± SD) controls	N cases male-stratified GWAS	N controls male-stratified GWAS	N cases female-stratified GWAS	N controls female-stratified GWAS	N cases NTG GWAS	N controls NTG GWAS	N cases HTG GWAS	N controls HTG GWAS	N cases X chromosome GWAS	N controls X chromosome GWAS
Europeans (Stage 1)
NEIGHBOR/MEEI	2606	2606	65.7 ± 13.4	68.3 ± 11.4	1244	1184	1362	1422	561	2606	1298	2606	NA	NA
EPIC-Norfolk Eye Study	664	5630	61.5 ± 7.9	55.6 ± 7.9	313	2512	351	3118	NA	NA	NA	NA	NA	NA
ANZRAG	3071	6750	NA	NA	1402	2465	1669	4285	821	6750	1544	6750	3071	6750
UKBB POAG ICD10 code	1448	22107	62.67 ± 5.6	56.36 ± 7.9	799	10234	649	11873	NA	NA	NA	NA	1440	22073
Kaiser Permanente GERA Cohort	3819	47961	79.6 ± 9.4	69.7 ± 13.0	NA	NA	NA	NA	NA	NA	NA	NA	3819	47961
KCL	576	287	70.5±13.5	80.3±4.3	256	109	320	178	346	287	230	287	NA	NA
BMES	107	600	*68.9 ± 7.9	*63.8 ± 8.3	NA	NA	NA	NA	NA	NA	NA	NA	NA	NA
Southampton	941	1557	>40	>40	NA	NA	NA	NA	NA	NA	NA	NA	NA	NA
GHS	47	2731	62.21 ±10.63	55.66 ±10.86	NA	NA	NA	NA	NA	NA	NA	NA	NA	NA
HPFS illumina	116	527	58.3 ± 8.4	51.5 ± 8.0	116	527	0	0	35	527	81	527	NA	NA
HPFS Affy	34	1297	58.7 ± 8.0	52.8 ± 7.9	34	1297	0	0	16	1297	18	1297	NA	NA
NHS illumina	266	1692	55.8 ± 6.4	53.2 ± 6.5	0	0	266	1692	91	1692	175	1692	NA	NA
NHS Affy	46	1992	55.7 ± 6.0	53.0 ± 6.7	0	0	46	1992	16	1992	30	1992	NA	NA
ERF	110	1999	NA	NA	NA	NA	NA	NA	NA	NA	NA	NA	NA	NA
Rotterdam Study I	198	1282	NA	NA	NA	NA	NA	NA	NA	NA	NA	NA	NA	NA
FINNGEN	1824	93036	65.6 ± 11.9	57.8 ± 16.1	759	40912	1065	52124	NA	NA	NA	NA	1821	92877
Geisinger 60K	664	5904	>18	>18	NA	NA	NA	NA	NA	NA	NA	NA	NA	NA
Geisinger 30K	140	1622	>18	>18	NA	NA	NA	NA	NA	NA	NA	NA	NA	NA
SUBTOTAL...	16677	199580			4923	59240	5728	76684	1886	15151	3376	15151	10151	169661
Europeans - replication (Stage 2)
UKBB self-report	7286	107362	61.24 ± 6.4	56.35 ± 7.9	3835	49575	3451	57787	NA	NA	NA	NA	7270	107241
Asians - replication (Stage 2)
CUHK (Hong Kong)	217	397	64.5±12.9	73±7.5	NA	NA	NA	NA	NA	NA	NA	NA	NA	NA
SCES (Singapore )	1033	2371	62.65 ± 9.60	58.58 ± 9.4	NA	NA	NA	NA	289	2371	709	2371	NA	NA
Kaiser Permanente GERA Cohort	439	4025	64.6 ± 14.4	76.6 ± 10.0	NA	NA	NA	NA	NA	NA	NA	NA	439	4025
Japanese Tohoku	1267	2517	64.55±12.6	56.36±15.56	NA	NA	NA	NA	NA	NA	NA	NA	NA	NA
Biobank Japan	3979	30278	67.99 ± 11.16	62.07 ± 14.6	1996	16559	1983	13719	1026	30278	807	30278	3979	30278
SUBTOTAL...	6935	39588			1996	16559	1983	13719	1315	32649	1516	32649	4418	34303
African - replication (Stage 2)
GIGA TZ	366	329	63.15 ± 10.96	66.55 ± 8.05	NA	NA	NA	NA	NA	NA	NA	NA	NA	NA
GIGA SAC	179	96	40.46 ± 10.99	68.34 ± 7.72	NA	NA	NA	NA	NA	NA	NA	NA	NA	NA
GIGA SAB	118	51	61.2 ± 11.49	66.78 ± 7.20	NA	NA	NA	NA	NA	NA	NA	NA	NA	NA
KCL	298	194	NA	NA	171	94	127	100	46	197	252	197	NA	NA
EAGC - African American	705	608	67.4 ± 12.3	54.0 ± 9.3	NA	NA	NA	NA	NA	NA	NA	NA	NA	NA
EAGC - Ghanaian	833	896	62.6 ± 13.9	61.6 ± 12.0	NA	NA	NA	NA	NA	NA	NA	NA	NA	NA
EAGC - Nigerian	554	348	64.8 ± 11.3	66.6 ± 8.3	NA	NA	NA	NA	NA	NA	NA	NA	NA	NA
EAGC - South African	228	269	59.8 ± 13.4	70.2 ± 8.3	NA	NA	NA	NA	NA	NA	NA	NA	NA	NA
SUBTOTAL...	3281	2791			171	94	127	100	46	197	252	197	NA	NA
Combined ancestry (Stage 3)
TOTAL	34179	349321			10925	125468	11289	148290	3247	47997	5144	47997	21839	311205
*Age was available, but was not fitted as a covariate in the regression model

## Sheet: Supplementary Data 2
SNP	CHR	Position	Effect allele	Other allele	OR_EUR	beta_EUR	SE_EUR	P_EUR	P_COJO	OR_UKBB	beta_UKBB	SE_UKBB	P_UKBB	OR_Asians	beta_Asians	SE_Asians	P_Asians	OR_Africans	beta_Africans	SE_Africans	P_Africans	Nearest gene	Status
rs4653159	1	36579215	A	G	1.1086	0.1031	0.0175	4.194e-09	2.89562e-09	1.08226	0.0790486	0.0235603	0.000793174	0.994913	-0.0051	0.0261	0.8458	0.919983	-0.0834	0.0948	0.379	COL8A2	Known
rs6687545	1	38071195	T	C	1.07702	0.0742	0.0129	9.732e-09	6.66765e-09	1.0286	0.028202	0.0174221	0.105505	1.00401	0.004	0.0217	0.853	1.10429	0.0992	0.0473	0.03604	GNL2/RSPO1	Known
rs1577488	1	101078400	A	G	0.880205	-0.1276	0.0192	2.974e-11	7.60814e-11	0.971591	-0.0288207	0.0270616	0.286808	0.979219	-0.021	0.0339	0.5366	0.93885	-0.0631	0.0385	0.1011	GPR88/LINC01349	Unknown
rs993471	1	103385373	A	G	0.922378	-0.0808	0.0131	7.757e-10	1.74995e-09	0.937603	-0.0644291	0.0176864	0.00026965	0.946864	-0.0546	0.0207	0.008406	1.15592	0.1449	0.0849	0.08787	COL11A1	Known
rs2790049	1	165743523	A	G	1.35649	0.3049	0.0182	1.163e-62	6.65834e-65	1.35472	0.303595	0.0239294	6.96823e-37	1.47138	0.3862	0.1704	0.02341	1.16964	0.1567	0.0698	0.02475	TMCO1	Known
rs74315329	1	171605478	A	G	8.24082	2.1091	0.1761	4.62e-33	5.22676e-35	4.14656	1.42228	0.144744	8.68505e-23	NA	NA	NA	NA	NA	NA	NA	NA	MYOC	Known
rs2113818	2	12890860	T	C	1.07326	0.0707	0.0128	3.297e-08	3.33005e-08	1.06511	0.0630781	0.0175413	0.000323214	1.0897	0.0859	0.0244	0.000419	1.01157	0.0115	0.0409	0.7776	TRIB2/LOC100506474	Unknown
rs2627761	2	55933014	T	C	0.907738	-0.0968	0.0165	4.447e-09	4.45627e-09	0.891965	-0.114328	0.0221302	2.38814e-07	0.923393	-0.0797	0.02	7.069e-05	0.838702	-0.1759	0.1167	0.1318	PNPT1/EFEMP1	Known
rs4414666	2	66537344	T	G	0.925334	-0.0776	0.0136	1.127e-08	1.15985e-08	0.94594	-0.0555766	0.0179714	0.0019865	0.887275	-0.1196	0.0237	4.729e-07	0.846792	-0.1663	0.0709	0.019	SPRED2/MIR4778	Known
rs55882252	2	153361700	T	C	0.906196	-0.0985	0.013	3.466e-14	3.5608e-14	0.935319	-0.0668676	0.0175364	0.000137254	0.934167	-0.0681	0.074	0.3579	0.845269	-0.1681	0.0662	0.01115	FMNL2	Known
rs9819278	3	85144350	A	G	0.90538	-0.0994	0.013	2.328e-14	2.084e-14	0.914746	-0.0891092	0.0175618	3.88984e-07	0.962906	-0.0378	0.0257	0.1409	0.950564	-0.0507	0.0521	0.331	CADM2	Known
rs62283809	3	171820211	T	G	0.838618	-0.176	0.027	7.515e-11	7.12611e-11	0.894652	-0.11132	0.0369199	0.00256813	0.896282	-0.1095	0.0237	3.738e-06	0.877218	-0.131	0.0819	0.1099	FNDC3B	Known
rs56233426	3	186128816	A	G	1.12288	0.1159	0.013	4.237e-19	4.92015e-19	1.08748	0.0838631	0.0176968	2.15143e-06	1.02122	0.021	0.0219	0.3384	1.09724	0.0928	0.0811	0.2526	DGKG/LOC253573	Known
rs6845653	4	7899379	T	C	0.837277	-0.1776	0.0134	7.278e-40	4.53778e-40	0.863222	-0.147083	0.0182166	6.78808e-16	1.04509	0.0441	0.0215	0.04006	0.774297	-0.2558	0.0781	0.00105	AFAP1	Known
rs10517281	4	54027595	A	G	1.10594	0.1007	0.0163	6.623e-10	6.51262e-10	1.06029	0.0585425	0.0225706	0.00949476	1.03169	0.0312	0.0237	0.1881	1.04718	0.0461	0.0502	0.3584	SCFD2	Unknown
rs17527016	4	111963719	T	C	0.906649	-0.098	0.0158	5.803e-10	5.57365e-10	0.949163	-0.0521749	0.020026	0.0091725	0.982947	-0.0172	0.0515	0.739	0.90674	-0.0979	0.2235	0.6614	PITX2/C4orf32	Unknown
rs31916	5	14814883	A	G	1.08307	0.0798	0.0145	3.961e-08	3.73086e-08	1.08096	0.0778495	0.0196433	7.40083e-05	1.01603	0.0159	0.021	0.4489	1.31903	0.2769	0.0973	0.004411	ANKH	Known
rs17135357	6	602983	A	C	0.884441	-0.1228	0.018	1.029e-11	1.85171e-12	0.870157	-0.139082	0.0240483	7.32042e-09	0.952657	-0.0485	0.0254	0.05641	0.906014	-0.0987	0.1111	0.3743	EXOC2	Known
rs2745572	6	1548369	A	G	1.13406	0.1258	0.0138	8.524e-20	1.68329e-19	1.1233	0.116271	0.0188777	7.31094e-10	1.06343	0.0615	0.0202	0.002316	1.05548	0.054	0.0987	0.5844	FOXF2/FOXCUT	Known
rs4512269	6	1987897	A	T	1.13769	0.129	0.019	1.21e-11	2.72433e-11	1.08292	0.0796614	0.0265337	0.00267964	1.16079	0.1491	0.0255	5.286e-09	0.969766	-0.0307	0.082	0.7079	GMDS	Known
rs9261431	6	30086422	C	G	1.09955	0.0949	0.0146	7.741e-11	9.79338e-11	1.02139	0.0211685	0.0190403	0.266235	0.9859	-0.0142	0.0253	0.573	1.0004	0.0004	0.0446	0.9931	TRIM31-AS1	Unknown
rs12208086	6	36586070	A	G	1.11438	0.1083	0.0152	9.74e-13	6.29285e-13	1.0233	0.0230332	0.0208512	0.269309	1.11016	0.1045	0.0206	3.96e-07	1.07498	0.0723	0.0586	0.2179	SRSF3/MIR3925	Known
rs1555214	6	45928400	T	C	1.08058	0.0775	0.0135	8.45e-09	9.69637e-09	1.03951	0.038746	0.0181159	0.0324542	1.0011	0.0011	0.027	0.9679	1.07659	0.0738	0.0421	0.07982	CLIC5	Unknown
rs2579989	6	51460154	T	G	0.813264	-0.2067	0.0214	5.237e-22	7.50151e-23	0.894633	-0.111342	0.0299536	0.00020151	0.899515	-0.1059	0.0353	0.00269	0.884617	-0.1226	0.0706	0.08227	TFAP2B/PKHD1	Known
rs2499475	6	51899824	A	G	0.925057	-0.0779	0.0148	1.38e-07	4.48947e-08	0.947154	-0.0542936	0.0206065	0.00841936	0.957816	-0.0431	0.0197	0.02901	0.996008	-0.004	0.0377	0.9164	PKHD1	Known
rs2811688	6	134372150	C	G	0.925334	-0.0776	0.0129	1.896e-09	2.61537e-10	0.990486	-0.00955955	0.0174063	0.582873	0.953706	-0.0474	0.0239	0.04743	0.898795	-0.1067	0.0415	0.01022	SLC2A12	Unknown
rs9494457	6	136474794	A	T	0.890119	-0.1164	0.0134	4.878e-18	5.62458e-19	0.929826	-0.0727578	0.0181593	6.15835e-05	0.960405	-0.0404	0.0234	0.08457	0.857358	-0.1539	0.0806	0.05626	PDE7B	Known
rs13197977	6	158971424	T	C	1.07788	0.075	0.0129	6.159e-09	6.11447e-09	1.05241	0.0510828	0.0174813	0.0034736	1.01898	0.0188	0.022	0.3924	1.05591	0.0544	0.0416	0.1915	TMEM181	Known
rs36039219	7	11704538	A	G	1.0822	0.079	0.0137	8.774e-09	8.1143e-09	1.0717	0.0692504	0.0181334	0.000134039	1.03977	0.039	0.0258	0.1305	0.969282	-0.0312	0.0781	0.6897	THSD7A	Known
rs10248136	7	39077397	T	C	1.09013	0.0863	0.0129	2.104e-11	2.24133e-11	1.03477	0.0341795	0.0174158	0.0496981	1.00541	0.0054	0.0247	0.8262	1.05075	0.0495	0.0783	0.5273	POU6F2	Known
rs4577906	7	82955177	C	G	0.930903	-0.0716	0.0129	3.025e-08	4.33439e-08	0.938948	-0.0629952	0.0175399	0.00032876	0.987973	-0.0121	0.0209	0.5608	0.931555	-0.0709	0.0476	0.1367	PCLO-SEMA3E	Unknown
rs1972459	7	83287607	A	G	0.921364	-0.0819	0.0134	1.078e-09	1.49492e-09	0.9614	-0.0393649	0.0179828	0.0285986	0.966475	-0.0341	0.022	0.1207	0.950374	-0.0509	0.0412	0.2168	SEMA3E/SEMA3A	Unknown
rs9649390	7	115801846	T	C	1.0694	0.0671	0.0144	3.138e-06	1.0606e-09	1.0373	0.0366212	0.0196218	0.0620054	1.03925	0.0385	0.0199	0.05307	1.01613	0.016	0.0378	0.6721	TFEC/TES	Known
rs12540035	7	116159526	A	G	1.12479	0.1176	0.0144	2.892e-16	6.11563e-20	1.12187	0.115001	0.0190372	1.53293e-09	1.25445	0.2267	0.1495	0.1293	1.09363	0.0895	0.0388	0.02124	CAV2/CAV1	Known
rs10230941	7	117636111	C	G	0.92626	-0.0766	0.0133	9.114e-09	7.9065e-10	0.911689	-0.0924564	0.0180933	3.2214e-07	0.969669	-0.0308	0.0397	0.4381	0.97414	-0.0262	0.0468	0.5753	CTTNBP2/LSM8	Known
rs2514885	8	108277130	T	G	1.13655	0.128	0.0204	3.294e-10	3.51866e-10	1.18338	0.168376	0.0277718	1.33727e-09	1.08883	0.0851	0.0221	0.0001169	1.19842	0.181	0.0556	0.001143	ANGPT1	Known
rs6475604	9	22052734	T	C	0.764449	-0.2686	0.0132	1e-91	6.65018e-92	0.863426	-0.146847	0.017782	1.47915e-16	0.718564	-0.3305	0.0313	4.078e-26	0.744308	-0.2953	0.2082	0.1561	CDKN2B-AS1	Known
rs2472494	9	107695539	T	C	1.20852	0.1894	0.013	2.102e-48	4.80001e-48	1.16719	0.154599	0.017517	1.08791e-18	1.20334	0.1851	0.0204	1.111e-19	1.12232	0.1154	0.0774	0.1361	ABCA1	Known
rs1336980	9	129377855	C	G	0.884087	-0.1232	0.0139	9.266e-19	5.00325e-27	0.870488	-0.138701	0.0182658	3.11107e-14	0.845861	-0.1674	0.0301	2.779e-08	0.906105	-0.0986	0.0594	0.097	LMX1B	Known
rs2027312	9	129920463	A	G	0.924872	-0.0781	0.0129	1.63e-09	1.22633e-09	0.957167	-0.0437776	0.0174448	0.0120988	1.02296	0.0227	0.0216	0.2933	0.95772	-0.0432	0.0411	0.2931	RALGPS1	Known
rs6602453	10	10840849	A	C	1.08502	0.0816	0.0135	1.685e-09	1.50293e-09	1.03314	0.0326027	0.0183045	0.0749132	1.02922	0.0288	0.0253	0.255	1.03438	0.0338	0.0464	0.4663	CELF2	Unknown
rs1649068	10	60304864	A	C	1.11138	0.1056	0.0129	3.302e-16	2.7223e-16	1.07408	0.0714645	0.0174894	4.39038e-05	1.0848	0.0814	0.0197	3.68e-05	0.913931	-0.09	0.044	0.04082	BICC1	Known
rs581796	11	86355565	T	C	0.854191	-0.1576	0.0238	3.457e-11	1.01288e-11	0.891671	-0.114658	0.0318195	0.0003141	0.917778	-0.0858	0.0247	0.0005227	0.998002	-0.002	0.0528	0.9702	ME3	Known
rs12786875	11	86490580	A	G	1.09253	0.0885	0.0145	1.127e-09	2.94824e-10	1.05545	0.0539684	0.0199248	0.00675696	1.02747	0.0271	0.0759	0.7208	1.01725	0.0171	0.0453	0.7055	ME3/PRSS23	Known
rs58073046	11	120248493	A	G	0.84139	-0.1727	0.0193	3.601e-19	1.07702e-18	0.879174	-0.128772	0.0258676	6.41945e-07	0.994416	-0.0056	0.0275	0.8387	0.706593	-0.3473	0.2709	0.1998	ARHGEF12	Known
rs7946009	11	128387422	T	C	0.920719	-0.0826	0.0135	9.959e-10	2.83239e-09	0.93578	-0.0663749	0.0185677	0.000350547	0.939789	-0.0621	0.0299	0.03801	0.962328	-0.0384	0.0502	0.4445	ETS1	Known
rs7972874	12	28203245	A	T	0.919799	-0.0836	0.015	2.607e-08	2.50377e-08	0.958819	-0.0420532	0.0200037	0.0355244	0.968507	-0.032	0.0335	0.3397	0.949139	-0.0522	0.2388	0.827	PTHLH/CCDC91	Unknown
rs2667477	12	84023388	T	C	0.899695	-0.1057	0.013	5.097e-16	4.30111e-16	0.96943	-0.031047	0.017522	0.0764154	0.946201	-0.0553	0.0275	0.04418	0.976579	-0.0237	0.0431	0.5823	TMTC2/SLC6A15	Known
rs7137828	12	111932800	T	C	1.08948	0.0857	0.0138	5.401e-10	5.3105e-10	1.03976	0.0389893	0.0173328	0.0244848	1.2158	0.1954	0.2362	0.4082	0.994913	-0.0051	0.2316	0.9824	ATXN2	Known
rs6490697	13	22679011	T	G	1.12784	0.1203	0.0167	6.636e-13	5.89266e-13	1.06464	0.0626367	0.0234034	0.00744436	1.05855	0.0569	0.0203	0.005135	1.08177	0.0786	0.0388	0.04268	LINC00424/LINC00540	Known
rs111439095	13	76254433	A	G	0.917686	-0.0859	0.0128	1.894e-11	1.94107e-11	0.960632	-0.0401639	0.0173582	0.0206787	0.989258	-0.0108	0.0672	0.8721	1.03832	0.0376	0.0406	0.3549	LMO7	Known
rs10151220	14	34715465	T	C	1.08177	0.0786	0.0143	3.483e-08	3.88175e-08	1.04526	0.0442657	0.017783	0.0128085	1.00642	0.0064	0.0225	0.7766	1.03676	0.0361	0.0778	0.6424	EGLN3/SPTSSA	Known
rs8009633	14	53386836	C	G	0.912105	-0.092	0.0157	4.579e-09	1.2583e-08	0.964283	-0.0363705	0.0207449	0.0795861	0.977556	-0.0227	0.023	0.3225	0.802118	-0.2205	0.1707	0.1965	FERMT2	Known
rs33912345	14	60976537	A	C	0.841895	-0.1721	0.0131	3.572e-39	5.63601e-39	0.891067	-0.115336	0.0176333	6.12094e-11	0.805735	-0.216	0.0248	3.006e-18	0.952181	-0.049	0.1001	0.6243	SIX6	Known
rs935328	15	57538801	A	T	1.09999	0.0953	0.0148	1.257e-10	1.04886e-10	1.06317	0.0612511	0.0195959	0.00177371	1.00833	0.0083	0.0248	0.7391	1.0007	0.0007	0.0413	0.9855	TCF12	Known
rs12438742	15	61947280	C	G	0.931555	-0.0709	0.0129	4.161e-08	3.381e-08	0.957662	-0.0432604	0.0176416	0.0142001	0.958007	-0.0429	0.0221	0.05207	0.940823	-0.061	0.116	0.5988	RORA/VPS13C	Known
rs6495085	15	74221313	C	G	0.890831	-0.1156	0.018	1.485e-10	1.34753e-10	0.951737	-0.0494661	0.0244324	0.0428889	0.882056	-0.1255	0.0295	2.058e-05	0.948854	-0.0525	0.0389	0.1773	LOXL1	Known
rs257336	16	65055840	T	G	0.919615	-0.0838	0.0146	9.383e-09	9.50558e-09	0.923506	-0.079578	0.0182986	1.36947e-05	1.04258	0.0417	0.0245	0.0884	0.899695	-0.1057	0.1221	0.3869	CDH11	Known
rs9913911	17	10031183	A	G	1.17433	0.1607	0.0134	5.898e-33	4.04407e-33	1.14329	0.13391	0.0182551	2.2117e-13	1.10241	0.0975	0.02	1.019e-06	1.13055	0.1227	0.1005	0.222	GAS7	Known
rs41543317	17	44087500	A	G	0.920996	-0.0823	0.0136	1.322e-09	1.43912e-09	0.959891	-0.0409355	0.0178778	0.0220357	1.00541	0.0054	0.0373	0.8838	0.915029	-0.0888	0.082	0.2789	MAPT	Unknown
rs11658334	17	58830188	A	G	1.12356	0.1165	0.0206	1.511e-08	1.55844e-08	1.08419	0.0808332	0.027882	0.00374307	0.968507	-0.032	0.0819	0.6964	0.97824	-0.022	0.0512	0.6672	BCAS3	Known
rs6117318	20	6507717	A	G	0.912105	-0.092	0.014	5.739e-11	5.0037e-11	0.926149	-0.0767203	0.0177117	1.48005e-05	0.879502	-0.1284	0.0252	3.646e-07	1.08156	0.0784	0.0798	0.326	CASC20	Known
rs7275118	20	18010447	T	G	1.07907	0.0761	0.0136	2.264e-08	2.20292e-08	0.974751	-0.0255732	0.0181428	0.158666	0.996506	-0.0035	0.0211	0.8675	0.958582	-0.0423	0.0489	0.3871	OVOL2	Unknown
rs8140413	22	18377329	A	G	1.09341	0.0893	0.016	2.413e-08	1.43466e-08	0.988435	-0.0116321	0.0222175	0.600532	1.01288	0.0128	0.024	0.5927	1.07176	0.0693	0.1601	0.6651	MICAL3	Unknown
rs1139795	22	19867771	T	C	0.866321	-0.1435	0.0196	2.22e-13	1.40571e-13	0.892371	-0.113873	0.02528	6.65155e-06	0.934728	-0.0675	0.0469	0.1501	0.951705	-0.0495	0.0802	0.5374	TXNRD2	Known
rs7284245	22	29613441	T	G	1.17939	0.165	0.0278	2.938e-09	2.77249e-09	0.984368	-0.0157552	0.0365019	0.665951	1.08915	0.0854	0.0323	0.008173	0.93688	-0.0652	0.0856	0.4457	EMID1	Known
rs55943282	X	13950270	A	C	1.086	0.0825	0.0135	9.207e-10	9.90838e-10	1.06395	0.061985	0.0141666	1.21204e-05	1.02984	0.0294	0.0655	0.6533	NA	NA	NA	NA	GPM6B	Unknown
rs67499600	X	43946621	A	C	0.925982	-0.0769	0.014	4.353e-08	3.95829e-08	0.933011	-0.0693383	0.0150615	4.15099e-06	0.963387	-0.0373	0.0297	0.2092	NA	NA	NA	NA	NDP/EFHC2	Unknown

## Sheet: Supplementary Data 3
Genome-wide significant loci in Asians
CHR	Position	SNP	Effect allele	Other allele	OR_ASN	BETA_ASN	SE_ASN	P_ASN	OR_EUR	BETA_EUR	SE_EUR	P_EUR	OR_UKBB_self_report	BETA_UKBB_self_report	SE_UKBB_self_report	P_UKBB_self_report	OR_AFR	BETA_AFR	SE_AFR	P_AFR	Nearest Gene
2	66592411	rs2946370	T	C	1.131	0.1231	0.0217	1.369e-08	1.04844	0.0473	0.0132	0.0003197	1.03756	0.0368756	0.0176096	0.036252	1.1146	0.1085	0.0999	0.2775	MIR4778-LOC729348
5	55775556	rs61275591	A	G	1.17727	0.1632	0.0217	5.962e-14	1.04854	0.0474	0.0245	0.05333	1.10801	0.10257	0.0322222	0.00145654	1.22189	0.2004	0.1374	0.1447	LOC102467147-C5orf67
6	1948703	rs12664587	A	T	1.16358	0.1515	0.0248	9.593e-10	1.1184	0.1119	0.0186	1.786e-09	1.09372	0.0895847	0.0261855	0.000623686	1.00833	0.0083	0.0573	0.8847	GMDS
9	22043926	rs1412829	A	G	1.39445	0.3325	0.0306	1.437e-27	1.26744	0.237	0.0132	6.196e-72	1.15844	0.147074	0.0178025	1.43934e-16	1.57381	0.4535	0.2123	0.03266	CDKN2B-AS1
9	107695539	rs2472494	T	C	1.20334	0.1851	0.0204	1.111e-19	1.20852	0.1894	0.013	2.102e-48	1.16719	0.154599	0.017517	1.08791e-18	1.12232	0.1154	0.0774	0.1361	ABCA1-SLC44A1
9	129390800	rs3829849	T	C	0.840381	-0.1739	0.0299	6.031e-09	0.885414	-0.1217	0.014	2.955e-18	0.869044	-0.140362	0.0183109	1.77926e-14	0.898166	-0.1074	0.0576	0.06245	LMX1B
10	126284415	rs61870251	A	C	0.865455	-0.1445	0.0228	2.304e-10	0.955806	-0.0452	0.0151	0.002689	0.971745	-0.0286619	0.0197513	0.146748	0.903662	-0.1013	0.0692	0.1434	LHPP
11	47728924	rs4303192	T	C	1.13122	0.1233	0.0215	9.231e-09	1.02747	0.0271	0.0183	0.1385	1.10216	0.0972689	0.0245906	7.63619e-05	0.959253	-0.0416	0.0897	0.6431	AGBL2
14	60847001	rs1254276	T	C	1.24508	0.2192	0.0248	1.128e-18	1.18187	0.1671	0.0131	2.026e-37	1.12041	0.113697	0.017654	1.19241e-10	1.05591	0.0544	0.0595	0.3602	PPM1A-C14orf39
15	74221210	15:74221210	G	GA	1.14683	0.137	0.021	6.709e-11	1.03087	0.0304	0.0253	0.2301	1.06507	0.063041	0.0184352	0.000627185	0.89467	-0.1113	0.0816	0.1726	LOXL1-AS1
Genome-wide significant loci in Africans
CHR	Position	SNP	Effect allele	Other allele	OR_AFR	BETA_AFR	SE_AFR	P_AFR	OR_EUR	BETA_EUR	SE_EUR	P_EUR	OR_UKBB_self_report	BETA_UKBB_self_report	SE_UKBB_self_report	P_UKBB_self_report	OR_ASN	BETA_ASN	SE_ASN	P_ASN	Nearest Gene
15	90975517	rs16944405	A	G	0.796443	-0.2276	0.0411	3.057e-08	1.0141	0.014	0.0139	0.3149	1.01188	0.01181	0.0187923	0.529632	0.964351	-0.0363	0.0204	0.0751	IQGAP1

## Sheet: Supplementary Data 4
CHR	Position	SNP	Effect allele	Other allele	OR_meta	BETA_meta	SE_meta	P_meta	P_heterogeneity	EA_freq_EUR_1000G	EA_freq_ASN_1000G	EA_freq_AFR_1000G	EUR_OR	EUR_BETA	EUR_SE	EUR_P	UKBB_OR	UKBB_BETA	UKBB_SE	UKBB_P	Asians_OR	Asians_BETA	Asians_SE	Asians_P	Africans_OR	Africans_BETA	Africans_SE	Africans_P	23andMe_BETA	23andMe_P	Nearest Gene	Status	PMID
1	8495590	rs172531	A	G	0.9445	-0.0571	0.0102	1.925e-08	0.03627	0.6741	0.9178	0.6606	0.950374	-0.0509	0.0136	0.0001853	0.962938	-0.0377663	0.0182101	0.0380869	0.871709	-0.1373	0.0301	5e-06	0.920719	-0.0826	0.0834	0.3218	-0.0379	5.5e-07	RERE	Unknown	NA
1	36612955	rs4652902	A	C	1.07929	0.0763	0.0113	1.797e-11	0.3687	0.7388	0.9161	0.9126	1.09013	0.0863	0.0152	1.456e-08	1.07757	0.0747117	0.0210917	0.000396789	1.02532	0.025	0.0327	0.4434	1.11382	0.1078	0.0626	0.08499	0.038	5.35e-06	TRAPPC3	Known	31959993
1	38076621	rs10908363	T	C	1.0518	0.0505	0.0093	4.885e-08	0.04021	0.5488	0.6748	0.2134	1.0753	0.0726	0.0129	1.614e-08	1.02698	0.0266233	0.0174193	0.126417	1.01268	0.0126	0.0229	0.5806	1.09549	0.0912	0.0471	0.05268	0.0343	1.36e-06	RSPO1	Known	31959993
1	54123873	rs941125	T	G	1.0646	0.0626	0.0093	2.012e-11	0.02178	0.3483	0.451	0.4065	1.05855	0.0569	0.0133	1.998e-05	1.05585	0.0543453	0.0178862	0.00237857	1.10329	0.0983	0.0199	8.144e-07	0.88285	-0.1246	0.0762	0.1022	0.0397	5.81e-08	GLIS1	Unknown	NA
1	68837169	rs4076000	A	C	1.05643	0.0549	0.0098	2.436e-08	0.113	0.3865	0.8829	0.7378	1.06919	0.0669	0.0131	3.137e-07	1.02214	0.0218985	0.0176584	0.214891	1.10583	0.1006	0.0357	0.004894	1.05739	0.0558	0.0452	0.2166	0.0381	1.53e-07	ELOCP18/RPE65	Unknown	NA
1	88213014	rs12139208	T	C	1.05559	0.0541	0.0094	9.551e-09	0.09849	0.3272	0.7378	0.7785	1.05866	0.057	0.0132	1.568e-05	1.08253	0.0793009	0.0178005	8.39881e-06	1.00773	0.0077	0.0229	0.7376	1.0378	0.0371	0.0475	0.4345	0.0394	6.76e-08	LINC01364/PKN2-AS1	Known	31959993
1	92077097	rs1192415	A	G	0.930624	-0.0719	0.0116	5.011e-10	0.1742	0.8232	0.8409	0.8171	0.927651	-0.0751	0.0163	4.254e-06	0.959647	-0.0411899	0.021942	0.0604605	0.895118	-0.1108	0.0255	1.391e-05	1.00924	0.0092	0.1012	0.9272	-0.101	1.07e-29	CDC7/TGFBR3	Known	31959993
1	101095202	rs12566440	A	G	0.935663	-0.0665	0.0093	9.338e-13	0.2218	0.6359	0.6661	0.7805	0.918237	-0.0853	0.0132	1.101e-10	0.948547	-0.0528239	0.0179442	0.00324203	0.962232	-0.0385	0.021	0.06621	0.939883	-0.062	0.0492	0.2082	-0.0638	2.27e-18	GPR88/LINC01349	Unknown	NA
1	103379918	rs3753841	A	G	0.933513	-0.0688	0.0093	1.648e-13	0.06782	0.6095	0.7115	0.0589	0.922378	-0.0808	0.0131	7.512e-10	0.936566	-0.0655349	0.0176877	0.000211272	0.946107	-0.0554	0.0207	0.007327	1.14637	0.1366	0.085	0.108	-0.0277	0.000132	COL11A1	Known	29891935
1	113242122	rs1106287	T	G	0.938286	-0.0637	0.0103	5.659e-10	0.2995	0.7639	0.4073	0.7906	0.945728	-0.0558	0.0153	0.0002672	0.958689	-0.0421886	0.0212242	0.0468384	0.910192	-0.0941	0.02	2.626e-06	0.927465	-0.0753	0.0457	0.09957	-0.0377	1.36e-05	MOV10	Known	31959993
1	162679145	rs4542196	A	G	0.941953	-0.0598	0.0099	1.804e-09	0.3721	0.7704	0.5874	0.1707	0.945728	-0.0558	0.0149	0.0001848	0.927136	-0.0756546	0.0193991	9.62324e-05	0.939789	-0.0621	0.0197	0.001589	1.01867	0.0185	0.0508	0.7162	-0.00232	0.78	DDR2	Unknown	NA
1	165737704	rs2790053	C	G	1.35026	0.3003	0.0141	2.48e-100	0.3556	0.1491	0.0105	0.065	1.3554	0.3041	0.0182	1.915e-62	1.35676	0.3051	0.0238713	2.09721e-37	1.49138	0.3997	0.1612	0.01313	1.20033	0.1826	0.0706	0.009668	0.245	1.93e-122	TMCO1	Known	31959993
1	171605478	rs74315329	A	G	5.46957	1.6992	0.1118	3.761e-52	0.002587	0.0026	0	0	8.24082	2.1091	0.1761	4.62e-33	4.14656	1.42228	0.144744	8.68505e-23	NA	NA	NA	NA	NA	NA	NA	NA	1.1	1.07e-42	MYOC	Known	30267046
1	219215137	rs6667536	A	G	0.867361	-0.1423	0.0218	6.118e-11	0.09792	0.0594	0	0.2154	0.898795	-0.1067	0.0275	0.0001063	0.821362	-0.196791	0.0378532	2.00494e-07	NA	NA	NA	NA	0.785684	-0.2412	0.1043	0.02077	-0.125	1.5e-17	LYPLAL1-DT	Known	31959993
2	12951321	rs12623251	T	C	0.932021	-0.0704	0.0095	1.434e-13	0.707	0.405	0.7465	0.0691	0.933793	-0.0685	0.0133	2.776e-07	0.937128	-0.0649353	0.0182257	0.000366988	0.926446	-0.0764	0.0212	0.0003083	0.852314	-0.1598	0.0815	0.04979	-0.0268	0.000284	TRIB2	Unknown	NA
2	28365914	rs17006576	A	G	1.05897	0.0573	0.0102	1.671e-08	0.5617	0.2876	0.299	0.1504	1.05866	0.057	0.0144	7.832e-05	1.07932	0.0763326	0.0195167	9.18635e-05	1.03873	0.038	0.0231	0.09955	1.0248	0.0245	0.0517	0.6356	0.0331	3.43e-05	BABAM2	Known	31959993
2	45878760	rs687914	T	G	0.928486	-0.0742	0.0121	8.885e-10	0.443	0.2216	0.042	0.0183	0.921917	-0.0813	0.0158	2.479e-07	0.935392	-0.0667891	0.0204503	0.00109029	0.939319	-0.0626	0.0499	0.2098	1.38417	0.3251	0.2635	0.2173	-0.0324	0.000159	PRKCE	Known	31959993
2	55933014	rs2627761	T	C	0.907828	-0.0967	0.011	1.367e-18	0.6111	0.8193	0.486	0.9248	0.907738	-0.0968	0.0165	4.447e-09	0.891965	-0.114328	0.0221302	2.38814e-07	0.923393	-0.0797	0.02	7.069e-05	0.838702	-0.1759	0.1167	0.1318	-0.0514	2.52e-08	PNPT1/EFEMP1	Known	31959993
2	59523041	rs6713914	T	C	1.05633	0.0548	0.0091	1.421e-09	0.8949	0.5752	0.6608	0.6159	1.04959	0.0484	0.0129	0.000168	1.0587	0.0570417	0.0175069	0.00112117	1.06791	0.0657	0.0211	0.001853	1.0678	0.0656	0.0388	0.09066	0.0213	0.00277	LOC105374754	Unknown	NA
2	66537344	rs4414666	T	G	0.923209	-0.0799	0.0098	2.803e-16	0.1045	0.657	0.6241	0.0752	0.925334	-0.0776	0.0136	1.127e-08	0.94594	-0.0555766	0.0179714	0.0019865	0.887275	-0.1196	0.0237	4.729e-07	0.846792	-0.1663	0.0709	0.019	-0.0598	3.51e-16	SPRED2/MIR4778	Known	31959993
2	69411517	rs6732795	A	C	0.947432	-0.054	0.0098	3.471e-08	0.9988	0.6174	0.1434	0.2541	0.947811	-0.0536	0.0131	4.264e-05	0.94793	-0.0534746	0.0178713	0.00276977	0.942801	-0.0589	0.0315	0.06108	0.949424	-0.0519	0.0462	0.2615	-0.0412	1.22e-08	ANTXR1	Known	31959993
2	71651939	rs12613800	A	T	1.06046	0.0587	0.0093	2.549e-10	0.2304	0.4578	0.6573	0.7886	1.06833	0.0661	0.0129	3.335e-07	1.07481	0.072145	0.0175158	3.80716e-05	1.02327	0.023	0.0227	0.3114	1.01126	0.0112	0.0497	0.8217	0.0262	0.000259	ZNF638	Unknown	NA
2	111638775	rs9308689	T	C	0.939037	-0.0629	0.0098	1.532e-10	0.3894	0.3865	0.3182	0.2541	0.945728	-0.0558	0.0144	0.0001033	0.91586	-0.0878918	0.0182985	1.55963e-06	0.958966	-0.0419	0.0222	0.05952	0.934728	-0.0675	0.044	0.1248	-0.0236	0.00131	ACOXL	Known	29891935
2	153364527	rs1579050	A	G	0.913748	-0.0902	0.0103	1.593e-18	0.7388	0.4116	0.9825	0.8821	0.909828	-0.0945	0.0131	5.268e-13	0.925501	-0.0774201	0.0177286	1.25975e-05	0.897897	-0.1077	0.072	0.1346	0.872843	-0.136	0.0605	0.02453	-0.0917	3.48e-37	FMNL2	Known	31959993
2	213760746	rs200621439	A	AT	0.866581	-0.1432	0.0201	1.207e-12	0.7546	0.3166	0.1993	0.3069	0.86269	-0.1477	0.0294	5.23e-07	0.865434	-0.144524	0.0286694	4.63241e-07	NA	NA	NA	NA	0.936412	-0.0657	0.1057	0.5343	-0.0749	1.98e-11	MIR4776-1	Known	31959993
3	24510794	rs9852634	A	C	1.0519	0.0506	0.0093	4.822e-08	0.1287	0.4974	0.5594	0.3659	1.05127	0.05	0.013	0.0001144	1.02513	0.0248194	0.0175962	0.158374	1.09319	0.0891	0.0207	1.731e-05	1.03107	0.0306	0.0794	0.6997	0.00558	0.436	THRB	Unknown	NA
3	25581798	rs1286770	T	C	0.910556	-0.0937	0.0133	1.818e-12	0.3473	0.1161	0.1469	0.311	0.920443	-0.0829	0.0197	2.649e-05	0.900641	-0.104648	0.0269044	0.000100341	0.930345	-0.0722	0.03	0.01623	0.854875	-0.1568	0.0414	0.0001511	-0.0669	6.17e-10	RARB	Known	31959993
3	56876596	rs1500708	T	C	0.937161	-0.0649	0.0108	2.132e-09	0.192	0.2124	0.1783	0.2459	0.930996	-0.0715	0.0154	3.619e-06	0.967795	-0.032735	0.0208562	0.116514	0.92118	-0.0821	0.0232	0.0004009	0.837445	-0.1774	0.0882	0.04432	-0.0401	2e-06	ARHGEF3	Unknown	NA
3	85172364	rs13101042	C	G	0.902668	-0.1024	0.0109	5.083e-21	0.9038	0.6214	0.1556	0.439	0.896999	-0.1087	0.0145	5.703e-14	0.911693	-0.0924516	0.017989	2.7585e-07	0.906649	-0.098	0.0456	0.03161	0.881791	-0.1258	0.0928	0.1751	NA	NA	CADM2	Known	31959993
3	105073472	rs6437582	A	C	0.950754	-0.0505	0.0092	3.76e-08	0.009757	0.3839	0.3811	0.3638	0.946012	-0.0555	0.0133	2.851e-05	0.935941	-0.0662028	0.0179619	0.000228034	1.0005	0.0005	0.02	0.9816	0.878095	-0.13	0.0398	0.001106	-0.0529	8.38e-13	ALCAM	Unknown	NA
3	150065280	rs11710845	T	C	0.934167	-0.0681	0.0114	2.603e-09	0.5361	0.2098	0.0979	0.0793	0.942141	-0.0596	0.0154	0.0001053	0.917541	-0.0860584	0.0202119	2.06441e-05	0.949899	-0.0514	0.0332	0.1218	0.834268	-0.1812	0.124	0.144	-0.0586	3.59e-12	LINC01214/TSC22D2	Known	31959993
3	169239578	rs4361323	A	G	0.945634	-0.0559	0.009	5.284e-10	0.7903	0.5673	0.5122	0.372	0.952943	-0.0482	0.013	0.0002169	0.93496	-0.0672515	0.0175193	0.000123684	0.947432	-0.054	0.0199	0.006627	0.926724	-0.0761	0.0392	0.05205	-0.0331	3.88e-06	MECOM	Known	31959993
3	171821356	rs62283813	A	G	0.871534	-0.1375	0.016	1.025e-17	0.1925	0.9538	0.7483	0.7317	0.83619	-0.1789	0.0277	1.022e-10	0.889287	-0.117335	0.0375047	0.0017568	0.896193	-0.1096	0.0238	3.927e-06	0.798197	-0.2254	0.0962	0.01913	-0.0337	0.034	FNDC3B	Known	29235454
3	186128816	rs56233426	A	G	1.09319	0.0891	0.0094	2.196e-21	0.002893	0.467	0.3059	0.6646	1.12288	0.1159	0.013	4.237e-19	1.08748	0.0838631	0.0176968	2.15143e-06	1.02122	0.021	0.0219	0.3384	1.09724	0.0928	0.0811	0.2526	0.0811	7.33e-29	DGKG-LOC253573	Known	31959993
3	188066953	rs6787621	T	G	0.92626	-0.0766	0.0101	2.947e-14	0.621	0.2982	0.3881	0.6707	0.936505	-0.0656	0.0148	9.379e-06	0.907569	-0.0969857	0.0203509	1.88202e-06	0.930159	-0.0724	0.0211	0.000612	0.910738	-0.0935	0.0402	0.02012	-0.0685	6.48e-17	LPP	Known	31959993
4	7904363	rs938604	A	G	0.866407	-0.1434	0.0096	7.875e-51	0.004228	0.6214	0.1801	0.1626	0.847046	-0.166	0.013	1.306e-37	0.875097	-0.13342	0.0176729	4.37269e-14	0.937442	-0.0646	0.026	0.01297	0.828449	-0.1882	0.0547	0.0005789	-0.107	1.16e-49	AFAP1	Known	31959993
4	54027595	rs10517281	A	G	1.07444	0.0718	0.0112	1.699e-10	0.08263	0.8193	0.7902	0.7988	1.10594	0.1007	0.0163	6.623e-10	1.06029	0.0585425	0.0225706	0.00949476	1.03169	0.0312	0.0237	0.1881	1.04718	0.0461	0.0502	0.3584	0.0536	3.36e-09	SCFD2	Unknown	NA
4	89752276	rs57400569	A	G	0.944216	-0.0574	0.0105	4.219e-08	0.3371	0.2441	0.5804	0.0976	0.953038	-0.0481	0.0153	0.001701	0.940504	-0.0613397	0.0215757	0.00446699	0.943556	-0.0581	0.0203	0.004134	0.85274	-0.1593	0.0591	0.007008	-0.0479	2.06e-08	FAM13A	Unknown	NA
4	111963719	rs17527016	T	C	0.92589	-0.077	0.012	1.6e-10	0.1984	0.2335	0.0559	0.0346	0.906649	-0.098	0.0158	5.803e-10	0.949163	-0.0521749	0.020026	0.0091725	0.982947	-0.0172	0.0515	0.739	0.90674	-0.0979	0.2235	0.6614	-0.0585	5.88e-10	LOC105377364/PITX2	Unknown	NA
4	184779187	rs6552711	T	G	1.05527	0.0538	0.0091	3.879e-09	0.5921	0.5158	0.2517	0.435	1.05982	0.0581	0.0129	6.504e-06	1.04814	0.0470182	0.0174994	0.00721261	1.03863	0.0379	0.0223	0.08974	1.09867	0.0941	0.0378	0.01289	0.0187	0.00862	STOX2	Unknown	NA
5	14814883	rs31916	A	G	1.06876	0.0665	0.0101	5.447e-11	0.008656	0.7084	0.6661	0.7988	1.08307	0.0798	0.0145	3.961e-08	1.08096	0.0778495	0.0196433	7.40083e-05	1.01603	0.0159	0.021	0.4489	1.31903	0.2769	0.0973	0.004411	0.0701	7.8e-19	ANKH	Known	31959993
5	55783678	rs112142644	A	G	1.13917	0.1303	0.0162	1.015e-15	0.4052	0.0805	0.2622	0.1138	1.08904	0.0853	0.0324	0.008499	1.13114	0.123228	0.0459086	0.00727025	1.16369	0.1516	0.0218	3.675e-12	1.14454	0.135	0.0615	0.02815	0.00227	0.901	LOC102467147/C5orf67	Known	29235454
6	1548369	rs2745572	A	G	1.11371	0.1077	0.0097	1.292e-28	0.05877	0.6451	0.514	0.8455	1.13406	0.1258	0.0138	8.524e-20	1.1233	0.116271	0.0188777	7.31094e-10	1.06343	0.0615	0.0202	0.002316	1.05548	0.054	0.0987	0.5844	0.102	1.16e-40	FOXF2/FOXCUT	Known	31959993
6	29806901	rs407238/rs115586772	C	G	0.93426	-0.068	0.0097	2.714e-12	0.3726	0.3799	0.1556	0.2642	0.920996	-0.0823	0.0136	1.46e-09	0.948088	-0.053308	0.0178702	0.00285354	0.93763	-0.0644	0.0256	0.01196	0.982456	-0.0177	0.0437	0.6856	-0.0336	3.93e-06	HLA-G	Unknown	NA
6	36570366	rs7344	T	C	0.917778	-0.0858	0.0102	5.721e-17	0.007015	0.7467	0.5962	0.9065	0.898885	-0.1066	0.0151	1.975e-12	0.977503	-0.0227539	0.0208512	0.275157	0.899245	-0.1062	0.0198	7.916e-08	0.912653	-0.0914	0.0592	0.1225	-0.0599	2.1e-12	SRSF3	Known	29891935
6	45919758	rs3777588	A	G	1.0577	0.0561	0.0098	9.358e-09	0.04552	0.6372	0.1958	0.2744	1.08037	0.0773	0.0135	9.689e-09	1.0402	0.0394157	0.0180609	0.0290812	0.9991	-0.0009	0.0271	0.9722	1.08166	0.0785	0.0423	0.06367	0.0324	1.09e-05	CLIC5	Unknown	NA
6	51414922	rs72904286	T	C	0.850781	-0.1616	0.015	4.579e-27	0.06636	0.1095	0.1101	0.1443	0.819222	-0.1994	0.0214	1.226e-20	0.887832	-0.118973	0.0300655	7.58505e-05	0.894491	-0.1115	0.0355	0.001674	0.839961	-0.1744	0.0528	0.0009557	-0.12	1.85e-24	TFAP2B/PKHD1	Known	31959993
6	122645298	rs7760346	A	C	0.951229	-0.05	0.0091	4.711e-08	0.4144	0.6253	0.5804	0.4472	0.940259	-0.0616	0.0132	3.076e-06	0.96708	-0.0334741	0.0177697	0.0595942	0.966088	-0.0345	0.0207	0.09468	0.922655	-0.0805	0.0376	0.03239	-0.0141	0.0526	GJA1/HSF2	Unknown	NA
6	134372150	rs2811688	C	G	0.946296	-0.0552	0.0093	2.557e-09	0.00915	0.5106	0.8077	0.748	0.925334	-0.0776	0.0129	1.896e-09	0.990486	-0.00955955	0.0174063	0.582873	0.953706	-0.0474	0.0239	0.04743	0.898795	-0.1067	0.0415	0.01022	-0.028	9.16e-05	SLC2A12	Unknown	NA
6	136462744	rs4612174	T	G	1.09461	0.0904	0.0094	7.289e-22	0.05331	0.6359	0.6119	0.7276	1.12288	0.1159	0.0134	5.005e-18	1.07743	0.0745786	0.0181207	3.85961e-05	1.05622	0.0547	0.0216	0.01147	1.06014	0.0584	0.0429	0.1736	0.0835	1.51e-29	PDE7B	Known	31959993
6	158971266	rs13194719	A	G	1.06014	0.0584	0.0092	2.21e-10	0.1679	0.4499	0.3112	0.3008	1.07832	0.0754	0.013	6.361e-09	1.05247	0.0511398	0.0174816	0.00343783	1.01939	0.0192	0.0221	0.3832	1.06716	0.065	0.0422	0.1238	0.0267	0.000192	TMEM181	Known	31959993
6	170454915	rs2935057	A	G	1.08426	0.0809	0.0124	5.759e-11	0.009421	0.1148	0.271	0.2195	1.07627	0.0735	0.0197	0.0001859	1.1567	0.145571	0.0253596	9.45449e-09	1.03283	0.0323	0.0228	0.1567	1.11049	0.1048	0.0447	0.01899	0.0521	1.18e-06	LINC00574/LOC102724511	Known	31959993
7	11679113	rs12699251	A	G	0.925705	-0.0772	0.0095	4.193e-16	0.2848	0.5884	0.8112	0.8862	0.927465	-0.0753	0.0132	1.097e-08	0.909651	-0.0946943	0.0177398	9.39887e-08	0.956476	-0.0445	0.0232	0.0549	0.880293	-0.1275	0.0558	0.02226	-0.0507	5.09e-12	THSD7A	Known	31959993
7	28401455	rs2191828	C	G	1.08242	0.0792	0.0126	3.743e-10	0.9624	0.0726	0.2675	0.2134	1.08665	0.0831	0.0205	5.205e-05	1.08296	0.079698	0.0273381	0.00355289	1.08296	0.0797	0.022	0.0002976	1.0577	0.0561	0.0462	0.2254	0.0436	0.000139	CREB5	Unknown	NA
7	35961137	rs6957752	T	C	1.05401	0.0526	0.0095	3.629e-08	0.5792	0.6293	0.4825	0.2215	1.06131	0.0595	0.0135	1.02e-05	1.06092	0.0591398	0.0178936	0.000949446	1.0245	0.0242	0.023	0.2915	1.04342	0.0425	0.0461	0.3557	0.0371	1.05e-06	SEPT7/LOC101928618	Unknown	NA
7	39077397	rs10248136	T	C	1.06014	0.0584	0.0095	7.737e-10	0.01055	0.5171	0.2308	0.4411	1.09013	0.0863	0.0129	2.104e-11	1.03477	0.0341795	0.0174158	0.0496981	1.00541	0.0054	0.0247	0.8262	1.05075	0.0495	0.0783	0.5273	0.0466	5.59e-11	POU6F2	Known	31959993
7	80845529	rs59101260	G	GA	1.09308	0.089	0.0132	1.768e-11	0.6597	0.6223	0.6171	0.5431	1.08502	0.0816	0.0247	0.0009333	1.11291	0.106978	0.0199775	8.55914e-08	1.06983	0.0675	0.0264	0.01051	1.07509	0.0724	0.0875	0.4082	0.0606	1.43e-14	SEMA3C/LOC105369146	Known	31959993
7	82949529	rs7805468	T	G	1.06375	0.0618	0.0091	1.21e-11	0.8206	0.4063	0.5769	0.9207	1.07262	0.0701	0.0129	6.19e-08	1.05773	0.0561251	0.0174872	0.00132862	1.05043	0.0492	0.0199	0.01353	1.06407	0.0621	0.0643	0.3342	0.0243	0.000632	PCLO/SEMA3E	Unknown	NA
7	103624813	rs12667675	A	G	1.07423	0.0716	0.0123	6.621e-09	0.4764	0.839	0.2815	0.7805	1.08785	0.0842	0.0181	3.311e-06	1.07967	0.0766554	0.0256986	0.00285656	1.05538	0.0539	0.0231	0.0196	0.964737	-0.0359	0.0914	0.6947	0.0382	0.000141	RELN	Known	31959993
7	116162306	rs10257125	A	T	0.890921	-0.1155	0.011	7.147e-26	0.8461	0.7599	0.993	0.622	0.889141	-0.1175	0.0144	3.202e-16	0.891523	-0.114824	0.0190406	1.6343e-09	0.79708	-0.2268	0.1506	0.1321	0.908192	-0.0963	0.0386	0.01262	-0.0795	2.14e-24	CAV1	Known	31959993
7	117636111	rs10230941	C	G	0.926631	-0.0762	0.0101	4.492e-14	0.3536	0.6385	0.9108	0.7967	0.92626	-0.0766	0.0133	9.114e-09	0.911689	-0.0924564	0.0180933	3.2214e-07	0.969669	-0.0308	0.0397	0.4381	0.97414	-0.0262	0.0468	0.5753	-0.0614	8.28e-17	CTTNBP2/LSM8	Known	31959993
7	134520521	rs10237321	A	C	0.94535	-0.0562	0.0095	3.922e-09	0.2598	0.3588	0.3724	0.7764	0.949234	-0.0521	0.0133	9.095e-05	0.931897	-0.070533	0.0181812	0.000104621	0.962135	-0.0386	0.0215	0.07259	0.817667	-0.2013	0.0895	0.02455	-0.0348	2.01e-06	CALD1	Known	31645673
7	151505698	rs62478245	T	C	1.1721	0.1588	0.0276	8.952e-09	0.4653	0.0396	0	0.002	1.15223	0.1417	0.0362	9.154e-05	1.20031	0.182582	0.042719	1.9196e-05	NA	NA	NA	NA	NA	NA	NA	NA	0.0134	0.526	PRKAG2	Known	31959993
8	6377141	rs2515437	C	G	0.891366	-0.115	0.0197	5.605e-09	0.3821	0.9472	1	0.8801	0.881086	-0.1266	0.0261	1.271e-06	0.927157	-0.0756324	0.0360541	0.0359282	NA	NA	NA	NA	0.856244	-0.1552	0.055	0.004769	-0.0556	0.000212	ANGPT2/MCPH1	Unknown	NA
8	30454209	rs35740987	CA	C	1.06812	0.0659	0.0111	2.98e-09	0.2733	0.5739	0.7448	0.8598	1.07584	0.0731	0.0181	5.359e-05	1.06841	0.0661716	0.0178144	0.000203788	1.06503	0.063	0.0235	0.007336	0.860794	-0.1499	0.1119	0.1807	0.0445	7.43e-10	GTF2E2	Unknown	NA
8	108273318	rs2514879	T	G	0.881086	-0.1266	0.0129	1.198e-22	0.02056	0.1161	0.2657	0.0935	0.879326	-0.1286	0.0205	3.627e-10	0.843788	-0.169854	0.0280934	1.48448e-09	0.920259	-0.0831	0.022	0.0001606	0.786077	-0.2407	0.0611	8.176e-05	-0.0926	6e-16	ANGPT1	Known	31959993
8	124554317	rs62521288	A	T	0.877569	-0.1306	0.0202	1.053e-10	0.5348	0.9446	1	0.9634	0.874765	-0.1338	0.0255	1.624e-07	0.886221	-0.120789	0.0334627	0.000306597	NA	NA	NA	NA	0.655537	-0.4223	0.272	0.1205	-0.139	3.66e-22	FBXO32	Known	31959993
9	22051670	rs944801	C	G	1.2663	0.2361	0.01	3.71e-123	1.5e-08	0.591	0.8986	0.9878	1.30656	0.2674	0.0132	5.45e-91	1.15934	0.147852	0.0177857	9.33491e-17	1.38777	0.3277	0.0306	9.441e-27	1.34878	0.2992	0.2028	0.1401	0.146	3.3e-90	CDKN2B-AS1	Known	31959993
9	107695539	rs2472494	T	C	1.19459	0.1778	0.0092	9.379e-83	0.3437	0.4274	0.5035	0.3069	1.20852	0.1894	0.013	2.102e-48	1.16719	0.154599	0.017517	1.08791e-18	1.20334	0.1851	0.0204	1.111e-19	1.12232	0.1154	0.0774	0.1361	0.126	1.5e-69	ABCA1	Known	31959993
9	113312231	rs61751937	C	G	1.18376	0.1687	0.0295	1.052e-08	0.9603	0.0409	0	0	1.18246	0.1676	0.0373	6.891e-06	1.18605	0.170629	0.0481549	0.000395081	NA	NA	NA	NA	NA	NA	NA	NA	0.122	3.89e-08	SVEP1	Unknown	NA
9	129390800	rs3829849	T	C	0.87529	-0.1332	0.0103	1.389e-38	0.4103	0.372	0.1364	0.0894	0.885414	-0.1217	0.014	2.955e-18	0.869044	-0.140362	0.0183109	1.77926e-14	0.840381	-0.1739	0.0299	6.031e-09	0.898166	-0.1074	0.0576	0.06245	-0.0778	1.19e-25	LMX1B	Known	31959993
9	136131188	rs8176749	T	C	1.10186	0.097	0.0148	5.522e-11	0.5254	0.0831	0.1976	0.1463	1.08134	0.0782	0.0234	0.0008238	1.08275	0.0795076	0.035543	0.0252894	1.13451	0.1262	0.0254	7.04e-07	1.11049	0.1048	0.0502	0.03666	0.0739	1.91e-08	ABO	Known	31959993
10	10840849	rs6602453	A	C	1.0594	0.0577	0.0098	3.383e-09	0.0864	0.3179	0.208	0.2175	1.08502	0.0816	0.0135	1.685e-09	1.03314	0.0326027	0.0183045	0.0749132	1.02922	0.0288	0.0253	0.255	1.03438	0.0338	0.0464	0.4663	0.0431	7.12e-09	CELF2	Unknown	NA
10	60326910	rs1658436	A	G	0.915944	-0.0878	0.0091	6.034e-22	0.121	0.5106	0.5087	0.3943	0.901766	-0.1034	0.0129	1.091e-15	0.930406	-0.0721346	0.0174572	3.59437e-05	0.922655	-0.0805	0.0197	4.376e-05	1.05707	0.0555	0.0776	0.4745	-0.0589	1.2e-16	BICC1	Known	31959993
10	78282063	rs2637250	T	C	1.05054	0.0493	0.009	4.661e-08	0.321	0.5475	0.6136	0.6159	1.06269	0.0608	0.013	2.731e-06	1.05394	0.0525355	0.017479	0.00265013	1.01623	0.0161	0.0203	0.4277	1.0538	0.0524	0.0389	0.1779	0.0214	0.00313	LRMDA	Known	31959993
10	94929116	rs10882167	T	C	1.07122	0.0688	0.01	5.169e-12	0.1688	0.3984	0.0332	0.3943	1.06652	0.0644	0.0131	9.315e-07	1.06832	0.0660917	0.0176575	0.000181842	1.02214	0.0219	0.0514	0.6696	1.15893	0.1475	0.039	0.0001587	0.0436	1.14e-09	CYP26A1/MYOF	Known	31959993
10	96023077	rs57866767	T	C	0.934541	-0.0677	0.009	3.765e-14	0.5363	0.5686	0.5122	0.4289	0.947148	-0.0543	0.0129	2.473e-05	0.920171	-0.0831958	0.0175008	1.99601e-06	0.927002	-0.0758	0.0199	0.0001406	0.920811	-0.0825	0.0383	0.0313	-0.0633	5.86e-19	PLCE1	Known	31959993
10	115546535	rs72837408	A	G	0.945634	-0.0559	0.0097	9.383e-09	0.494	0.6887	0.6014	0.5264	0.933793	-0.0685	0.014	9.288e-07	0.947468	-0.0539621	0.0185758	0.00367295	0.965219	-0.0354	0.0205	0.08339	1.00391	0.0039	0.0787	0.9604	-0.0272	0.000517	MIR4483/PLEKHS1	Unknown	NA
10	126278648	rs10430737	T	C	1.06131	0.0595	0.0094	2.319e-10	0.03132	0.4129	0.3392	0.3902	1.04854	0.0474	0.0137	0.0005422	1.04072	0.0399128	0.0180557	0.0270799	1.12086	0.1141	0.0208	3.992e-08	1.05834	0.0567	0.0393	0.1493	0.0284	9.52e-05	LHPP	Known	29452408
11	17011176	rs4141194	A	C	1.06705	0.0649	0.0099	4.534e-11	0.2049	0.2757	0.4056	0.0264	1.05327	0.0519	0.0141	0.000238	1.05896	0.0572849	0.0189636	0.0025211	1.10329	0.0983	0.0201	1.034e-06	1.3295	0.2848	0.2441	0.2433	0.0616	8.7e-15	PLEKHA7	Known	31959993
11	47469439	rs7111873	A	G	1.07627	0.0735	0.0097	4.362e-14	0.2604	0.2942	0.3497	0.622	1.0557	0.0542	0.0141	0.0001146	1.08681	0.0832468	0.0189141	1.07487e-05	1.10572	0.1005	0.0198	3.964e-07	1.08513	0.0817	0.078	0.2946	0.0736	7.01e-21	RAPSN	Known	31959993
11	65337251	rs1346	A	T	1.0921	0.0881	0.0122	5.047e-13	0.9381	0.8179	0.8007	0.9004	1.09188	0.0879	0.0176	5.676e-07	1.10244	0.0975259	0.0223744	1.30871e-05	1.07929	0.0763	0.0263	0.003705	1.06673	0.0646	0.1325	0.6256	0.0762	3.97e-16	ZNRD2/SSSCA1	Known	31959993
11	86368106	rs10792871	T	C	1.12142	0.1146	0.0142	6.488e-16	0.2541	0.0818	0.1836	0.1463	1.16009	0.1485	0.0226	4.562e-11	1.1125	0.10661	0.0304964	0.00047242	1.09057	0.0867	0.0249	0.0005034	1.07832	0.0754	0.0557	0.1762	0.119	5.72e-21	ME3	Known	31959993
11	102064834	rs7120067	A	C	1.05496	0.0535	0.0095	1.597e-08	0.1705	0.3522	0.3969	0.185	1.07423	0.0716	0.0136	1.358e-07	1.02205	0.0218091	0.0183371	0.234295	1.04959	0.0484	0.0205	0.01849	1.07907	0.0761	0.0508	0.1343	0.0267	0.000467	YAP1	Unknown	NA
11	115039683	rs10444329	A	G	0.93885	-0.0631	0.0113	2.36e-08	0.9447	0.8087	0.7063	0.435	0.934354	-0.0679	0.0167	4.726e-05	0.935244	-0.0669481	0.0228147	0.00334174	0.949234	-0.0521	0.0215	0.01549	0.944216	-0.0574	0.0783	0.4635	-0.0181	0.0467	CADM1	Unknown	NA
11	120198093	rs1893261	A	G	1.08904	0.0853	0.0093	4.339e-20	0.04386	0.3813	0.2483	0.4451	1.08915	0.0854	0.0132	9.834e-11	1.10358	0.0985604	0.0177687	2.90843e-08	1.03998	0.0392	0.0225	0.08192	1.16707	0.1545	0.0378	4.319e-05	0.0758	1.05e-24	TLCD5/ARHGEF12/TMEM136	Known	31959993
11	128380742	rs7924522	A	C	1.07993	0.0769	0.0101	2.131e-14	0.9255	0.6583	0.8899	0.8028	1.086	0.0825	0.0135	1.036e-09	1.0692	0.0669104	0.0185624	0.000312571	1.08047	0.0774	0.0314	0.01357	1.07552	0.0728	0.0464	0.1166	0.0569	2.16e-14	ETS1	Known	31959993
11	130282078	rs2875238	T	C	0.935289	-0.0669	0.0108	5.019e-10	0.04144	0.3285	0.0315	0.1524	0.927465	-0.0753	0.0141	8.541e-08	0.95397	-0.0471231	0.0183054	0.0100444	0.877481	-0.1307	0.0427	0.002217	1.1983	0.1809	0.1171	0.1223	-0.0712	1.18e-20	ADAMTS8	Known	31959993
12	28203245	rs7972874	A	T	0.937536	-0.0645	0.0113	1.122e-08	0.2811	0.2375	0.1101	0.0122	0.919799	-0.0836	0.015	2.607e-08	0.958819	-0.0420532	0.0200037	0.0355244	0.968507	-0.032	0.0335	0.3397	0.949139	-0.0522	0.2388	0.827	-0.0471	1.33e-08	PTHLH/CCDC91	Unknown	NA
12	83948055	rs324788	T	C	0.928579	-0.0741	0.0095	8.239e-15	0.004721	0.4169	0.1364	0.2642	0.900054	-0.1053	0.013	6.946e-16	0.967927	-0.0325986	0.0175432	0.0631441	0.947337	-0.0541	0.028	0.05315	0.971611	-0.0288	0.0433	0.5053	-0.0853	1.62e-32	TMTC2/SLC6A15	Known	31959993
12	107219308	rs1037013	A	G	1.0539	0.0525	0.0092	9.816e-09	0.01128	0.5726	0.7168	0.4268	1.06769	0.0655	0.013	4.501e-07	1.01613	0.0160013	0.0175866	0.362767	1.09604	0.0917	0.0218	2.625e-05	0.991139	-0.0089	0.0385	0.8164	0.0251	0.000459	RIC8B	Known	26752265
12	111932800	rs7137828	T	C	1.07004	0.0677	0.0108	3.324e-10	0.1842	0.5317	0.9948	0.9736	1.08948	0.0857	0.0138	5.401e-10	1.03976	0.0389893	0.0173328	0.0244848	1.2158	0.1954	0.2362	0.4082	0.994913	-0.0051	0.2316	0.9824	0.043	1.78e-09	ATXN2	Known	31959993
13	22673870	rs4769194	A	G	1.08948	0.0857	0.0107	1.238e-15	0.1546	0.1755	0.3164	0.5305	1.11997	0.1133	0.0165	6.058e-12	1.06948	0.0671725	0.0226928	0.00307518	1.06035	0.0586	0.0203	0.00394	1.09024	0.0864	0.0386	0.02519	0.0672	3.14e-13	LINC00424/LINC00540	Known	29891935
13	73639371	rs9530143	A	G	0.941106	-0.0607	0.0101	2.005e-09	0.4816	0.3826	0.1906	0.0447	0.935569	-0.0666	0.0137	1.274e-06	0.939841	-0.0620448	0.0188473	0.000995703	0.966572	-0.034	0.0253	0.1778	0.796363	-0.2277	0.155	0.1418	-0.0392	2.97e-07	KLF5	Known	31959993
13	76258720	rs9544024	A	G	0.9337	-0.0686	0.0101	1.113e-11	0.1045	0.4789	0.9668	0.6423	0.920535	-0.0828	0.0128	9.469e-11	0.959395	-0.0414524	0.0173656	0.0169849	0.987775	-0.0123	0.0673	0.8551	0.836691	-0.1783	0.0823	0.03024	-0.0579	2.87e-16	LMO7	Known	31959993
13	110777939	rs2218471	C	G	0.944122	-0.0575	0.0101	1.387e-08	0.06856	0.5026	0.9528	0.8902	0.937067	-0.065	0.0132	8.483e-07	0.967112	-0.033441	0.0176316	0.0578752	0.883645	-0.1237	0.0378	0.001077	1.10738	0.102	0.1171	0.3837	-0.0252	0.000503	LINC00396/COL4A1	Known	31959993
14	53960089	rs12433661	A	G	1.05929	0.0576	0.0092	3.207e-10	0.7288	0.5805	0.5402	0.252	1.05665	0.0551	0.0133	3.66e-05	1.0473	0.0462154	0.0175979	0.00863188	1.0781	0.0752	0.0199	0.0001614	1.07111	0.0687	0.0434	0.1137	0.0292	4.95e-05	LOC105370504/MIR5580	Known	31959993
14	60976537	rs33912345	A	C	0.851633	-0.1606	0.0096	2.177e-62	0.003515	0.6095	0.243	0.0447	0.841895	-0.1721	0.0131	3.572e-39	0.891067	-0.115336	0.0176333	6.12094e-11	0.805735	-0.216	0.0248	3.006e-18	0.952181	-0.049	0.1001	0.6243	-0.113	3.38e-54	SIX6	Known	31959993
14	75084829	rs754458	A	G	1.06035	0.0586	0.0093	3.083e-10	0.2987	0.5079	0.1608	0.439	1.05971	0.058	0.0128	5.939e-06	1.0593	0.0576111	0.017353	0.00090026	1.03345	0.0329	0.0264	0.2131	1.12896	0.1213	0.038	0.001409	0.0522	1.61e-13	LTBP2/AREL1	Known	31959993
14	76371658	rs4903352	C	G	1.07401	0.0714	0.0117	9.6e-10	0.3017	0.8404	0.736	0.8211	1.05686	0.0553	0.0177	0.001789	1.11737	0.110975	0.02419	4.48235e-06	1.06876	0.0665	0.0221	0.002666	1.05707	0.0555	0.0508	0.2751	0.0257	0.00834	TTLL5	Unknown	NA
14	95956875	rs72692789	T	C	1.0968	0.0924	0.0169	4.252e-08	0.9192	0.876	0.9703	0.937	1.10109	0.0963	0.0221	1.353e-05	1.08336	0.0800673	0.0283311	0.00471263	1.15108	0.1407	0.1201	0.2414	1.12761	0.1201	0.0813	0.1397	0.0521	1.08e-05	SYNE3/SNHG10	Unknown	NA
15	57553832	rs2431023	A	T	1.07026	0.0679	0.01	1.065e-11	0.168	0.4156	0.6311	0.6159	1.07648	0.0737	0.0131	1.795e-08	1.05685	0.0552928	0.0174828	0.00156333	1.04634	0.0453	0.0359	0.2076	1.25521	0.2273	0.0803	0.004629	0.0513	1.18e-12	TCF12	Known	31959993
15	61947280	rs12438742	C	G	0.94365	-0.058	0.0094	6.722e-10	0.5388	0.3958	0.3584	0.9309	0.931555	-0.0709	0.0129	4.161e-08	0.957662	-0.0432604	0.0176416	0.0142001	0.958007	-0.0429	0.0221	0.05207	0.940823	-0.061	0.116	0.5988	-0.0566	3.16e-15	LOC107984782/RORA/VPS13C	Known	31959993
15	67025403	rs2439386	T	C	0.935663	-0.0665	0.0103	1.087e-10	0.9492	0.7203	0.8234	0.6809	0.937067	-0.065	0.0142	4.919e-06	0.940212	-0.06165	0.019091	0.00124048	0.925797	-0.0771	0.0253	0.002269	0.911923	-0.0922	0.0795	0.2462	-0.0367	2.69e-06	SMAD6	Unknown	NA
15	74221298	rs1550437	T	C	0.913657	-0.0903	0.0115	4.615e-15	0.08261	0.2084	0.3899	0.6098	0.910192	-0.0941	0.0172	4.271e-08	0.958506	-0.0423792	0.0235916	0.0724444	0.883203	-0.1242	0.0214	6.379e-09	0.916494	-0.0872	0.0776	0.2609	-0.0679	4.28e-13	LOXL1	Known	31959993
15	92331707	rs8038628	A	G	0.935289	-0.0669	0.0121	2.907e-08	0.299	0.8562	0.4493	0.4024	0.911376	-0.0928	0.0185	5.379e-07	0.95758	-0.043346	0.0250778	0.0839027	0.952848	-0.0483	0.0212	0.02278	0.916219	-0.0875	0.0834	0.2946	-0.025	0.0147	SLCO3A1/SV2B	Unknown	NA
16	51601948	rs114367221	T	C	1.11182	0.106	0.0177	2.243e-09	0.3186	0.0594	0	0.1728	1.13906	0.1302	0.0245	1.078e-07	1.09093	0.0870328	0.029928	0.00363653	NA	NA	NA	NA	1.05982	0.0581	0.0502	0.2471	0.0674	1.87e-07	SALL1/LINC01571	Known	31959993
16	59995564	rs190157577	A	G	0.390081	-0.9414	0.159	3.227e-09	0.9722	0.9987	1	1	0.394356	-0.9305	0.3512	0.008056	0.388983	-0.94422	0.178367	1.19871e-07	NA	NA	NA	NA	NA	NA	NA	NA	NA	NA	LOC101927580/LINC02141/LOC105371299	Unknown	NA
16	65067443	rs12447201	T	C	0.943273	-0.0584	0.0099	4.219e-09	0.0001453	0.3206	0.2325	0.0305	0.927929	-0.0748	0.0137	4.604e-08	0.922024	-0.0811836	0.0182658	8.79765e-06	1.04091	0.0401	0.0244	0.1005	0.852144	-0.16	0.0996	0.1082	-0.0468	4.38e-10	CDH11	Known	31959993
16	77661732	rs280875	T	C	0.901676	-0.1035	0.0181	1.013e-08	0.9677	0.9208	0.9878	0.9512	0.904295	-0.1006	0.0237	2.199e-05	0.89621	-0.109581	0.0311271	0.00043092	0.897269	-0.1084	0.0665	0.1031	0.98462	-0.0155	0.1969	0.9373	-0.0905	6.94e-13	ADAMTS18/NUDT7	Known	31959993
17	2201944	rs216197	A	G	0.941576	-0.0602	0.0096	3.075e-10	0.796	0.372	0.2203	0.6301	0.944783	-0.0568	0.0134	2.284e-05	0.947279	-0.0541616	0.018345	0.00315317	0.933607	-0.0687	0.024	0.004229	0.911011	-0.0932	0.0388	0.01621	-0.0526	2.53e-12	SMG6	Known	31959993
17	10031183	rs9913911	A	G	1.14912	0.139	0.0095	7.256e-49	0.07088	0.6464	0.4825	0.811	1.17433	0.1607	0.0134	5.898e-33	1.14329	0.13391	0.0182551	2.2117e-13	1.10241	0.0975	0.02	1.019e-06	1.13055	0.1227	0.1005	0.222	0.137	2.1e-73	GAS7	Known	31959993
17	44025888	rs242559/rs114919114	A	C	0.929415	-0.0732	0.0119	8.795e-10	0.937	0.7559	0.9441	0.5305	0.931276	-0.0712	0.0157	5.529e-06	0.926775	-0.076044	0.0202818	0.000177208	0.913474	-0.0905	0.0501	0.07085	0.972097	-0.0283	0.088	0.7477	-0.0422	4.16e-07	MAPT	Unknown	NA
17	45695242	rs1348518145	A	AT	0.938568	-0.0634	0.011	9.237e-09	0.6244	0.5258	0.5565	0.7496	0.946769	-0.0547	0.0209	0.008999	0.939982	-0.0618944	0.0173863	0.000370658	0.924317	-0.0787	0.0202	9.818e-05	1.01847	0.0183	0.0816	0.8223	-0.0363	3.26e-07	NPEPPS	Unknown	NA
17	59239221	rs11868441	A	G	1.0781	0.0752	0.0111	1.488e-11	0.8068	0.2098	0.2395	0.9228	1.08491	0.0815	0.016	3.333e-07	1.06284	0.0609446	0.0219219	0.00543777	1.08361	0.0803	0.0224	0.0003408	1.0016	0.0016	0.1249	0.9897	0.0315	0.000346	BCAS3	Known	31959993
20	6470094	rs2326788	A	G	0.916036	-0.0877	0.0095	1.776e-20	0.4751	0.3865	0.7168	0.2866	0.919615	-0.0838	0.0133	3.016e-10	0.918501	-0.0850119	0.0181892	2.9549e-06	0.891723	-0.1146	0.0225	3.6e-07	0.956284	-0.0447	0.0438	0.3066	-0.0567	1.52e-14	CASC20	Known	31959993
20	38074218	rs6101546	T	C	1.05897	0.0573	0.0093	6.933e-10	0.0793	0.4617	0.229	0.248	1.04248	0.0416	0.0129	0.001219	1.07096	0.0685554	0.0173622	7.85975e-05	1.06396	0.062	0.0238	0.009341	1.16941	0.1565	0.0451	0.0005127	0.0317	8.18e-06	LOC339568/LINC01370	Known	31959993
20	45534053	rs6124885	A	G	0.918604	-0.0849	0.0153	2.783e-08	0.2705	0.9472	0.6224	0.8943	0.914754	-0.0891	0.0281	0.001527	0.865548	-0.144392	0.0363689	7.18111e-05	0.940447	-0.0614	0.0214	0.004105	0.906196	-0.0985	0.1159	0.3952	-0.0529	0.000522	EYA2	Unknown	NA
21	27216839	rs13049669	A	T	0.909646	-0.0947	0.0158	2.226e-09	0.2924	0.062	0.2395	0.0061	0.905743	-0.099	0.0248	6.603e-05	0.950832	-0.0504174	0.0336412	0.133924	0.890119	-0.1164	0.026	7.301e-06	NA	NA	NA	NA	-0.0707	2.83e-07	GABPA/APP	Unknown	NA
21	40406630	rs13050568	A	G	1.06791	0.0657	0.0108	1.269e-09	0.5323	0.2177	0.3007	0.0528	1.06078	0.059	0.0153	0.0001095	1.08595	0.0824592	0.0208271	7.51998e-05	1.05908	0.0574	0.0228	0.01172	1.30174	0.2637	0.1788	0.1403	0.0425	8.18e-07	LOC101928435/PSMG1	Unknown	NA
22	19870147	rs8141610	T	C	0.878008	-0.1301	0.0149	3.099e-18	0.7994	0.1491	0.0122	0.2033	0.86988	-0.1394	0.0199	2.414e-12	0.895761	-0.110082	0.0255064	1.59067e-05	0.887897	-0.1189	0.1322	0.3684	0.859418	-0.1515	0.0525	0.003885	-0.0711	2.9e-12	TXNRD2	Known	31959993
22	29108229	rs5752776	A	G	0.926631	-0.0762	0.0104	2.557e-13	0.4881	0.3153	0.1941	0.4654	0.93342	-0.0689	0.014	8.941e-07	0.907184	-0.09741	0.0188053	2.21999e-07	0.950184	-0.0511	0.0297	0.08533	0.897179	-0.1085	0.0779	0.1636	-0.0807	2.61e-25	CHEK2	Known	31959993
22	38176979	rs5750494	T	G	1.08047	0.0774	0.0094	2.415e-16	0.5299	0.4274	0.3374	0.5305	1.07423	0.0716	0.0134	1.016e-07	1.06959	0.0672754	0.01789	0.000169571	1.10716	0.1018	0.0206	7.674e-07	1.12829	0.1207	0.0791	0.1271	0.064	1.48e-18	TRIOBP	Known	31959993
X	3329593	rs12846405	T	C	1.0557	0.0542	0.0091	2.63e-09	0.3196	0.369	0.1706	0.1406	1.04123	0.0404	0.013	0.001906	1.07171	0.069259	0.0142714	1.21599e-06	1.06173	0.0599	0.0282	0.03363	NA	NA	NA	NA	0.0229	0.000121	MXRA5/PRKX	Unknown	NA
X	13954397	rs66819623	T	C	1.07993	0.0769	0.0097	1.829e-15	0.4673	0.2655	0.0164	0.2785	1.08177	0.0786	0.0134	4.641e-09	1.08159	0.0784362	0.0142437	3.6555e-08	0.986788	-0.0133	0.0738	0.8566	NA	NA	NA	NA	0.0384	1.62e-10	GPM6B	Unknown	NA
X	43940827	rs17146835	T	C	0.93286	-0.0695	0.0097	6.696e-13	0.5053	0.8034	0.8855	0.7003	0.926724	-0.0761	0.014	5.345e-08	0.932254	-0.07015	0.0150417	3.10565e-06	0.96252	-0.0382	0.0293	0.1929	NA	NA	NA	NA	-0.058	5.7e-20	NDP/EFHC2	Unknown	NA
X	109786110	rs12013156	A	C	0.930345	-0.0722	0.0103	2.015e-12	0.6097	0.2759	0.014	0.4244	0.927929	-0.0748	0.0147	3.569e-07	0.934885	-0.0673315	0.0145728	3.83027e-06	0.862259	-0.1482	0.0826	0.07281	NA	NA	NA	NA	-0.0248	3.41e-05	TDGF1P3/CHRDL1	Unknown	NA

## Sheet: Supplementary Data 5
CHR	Position	SNP	Effect_allele	Other_allele	OR_meta	BETA_meta	SE_meta	P_meta	IOP_Effect_allele	IOP_Other_allele	IOP_BETA	IOP_SE	IOP_P	VCDR_effect_allele	VCDR_other_allele	VCDR_BETA	VCDR_SE	VCDR_P	Gene
1	8495590	rs172531	A	G	0.9445	-0.0571	0.0102	1.925e-08	A	G	-0.0139	0.0134	0.2986	A	G	-0.0046	0.0008	3.5e-09	LOC102724552
1	36612955	rs4652902	A	C	1.07929	0.0763	0.0113	1.797e-11	A	C	0.0797	0.015	1.107e-07	A	C	0.0014	0.0009	0.1015	TRAPPC3
1	38076621	rs10908363	T	C	1.0518	0.0505	0.0093	4.885e-08	T	C	0.0693	0.0129	7.183e-08	T	C	0	0.0004	0.9315	RSPO1
1	54123873	rs941125	T	G	1.0646	0.0626	0.0093	2.012e-11	T	G	0.0245	0.0133	0.06457	T	G	0.0009	0.0006	0.1678	GLIS1
1	68837169	rs4076000	A	C	1.05643	0.0549	0.0098	2.436e-08	A	C	0.0101	0.0133	0.4465	A	C	0.0077	0.0008	1.27e-20	WLS-RPE65
1	88213014	rs12139208	T	C	1.05559	0.0541	0.0094	9.551e-09	T	C	0.0725	0.0131	2.922e-08	T	C	0.0016	0.0008	0.03711	LINC01364-PKN2-AS1
1	92077097	rs1192415	A	G	0.930624	-0.0719	0.0116	5.011e-10	A	G	-0.0331	0.0162	0.04107	A	G	-0.0182	0.0009	8.97e-83	CDC7-TGFBR3
1	101095202	rs12566440	A	G	0.935663	-0.0665	0.0093	9.338e-13	A	G	-0.0488	0.0132	0.0002258	A	G	-0.003	0.0008	0.000122	LINC01349
1	103379918	rs3753841	A	G	0.933513	-0.0688	0.0093	1.648e-13	A	G	-0.0124	0.013	0.3394	A	G	-0.0025	0.0009	0.004425	COL11A1
1	113242122	rs1106287	T	G	0.938286	-0.0637	0.0103	5.659e-10	T	G	-0.1013	0.0158	1.499e-10	T	G	-0.0028	0.001	0.003248	RHOC
1	162679145	rs4542196	A	G	0.941953	-0.0598	0.0099	1.804e-09	A	G	-0.0071	0.0145	0.6217	A	G	-0.0002	0.0009	0.8178	DDR2
1	165737704	rs2790053	C	G	1.35026	0.3003	0.0141	2.48e-100	C	G	0.3322	0.0192	4.581e-67	C	G	0.0055	0.0011	1.8e-06	LOC100147773
1	171605478	rs74315329	A	G	5.46957	1.6992	0.1118	3.761e-52	A	G	1.8929	0.2099	1.896e-19	NA	NA	NA	NA	NA	MYOC
1	219215137	rs6667536	A	G	0.867361	-0.1423	0.0218	6.118e-11	A	G	-0.1813	0.026	3.049e-12	A	G	-0.0018	0.002	0.3845	MIR548F3
2	12951321	rs12623251	T	C	0.932021	-0.0704	0.0095	1.434e-13	T	C	-0.0131	0.0132	0.3199	T	C	-0.0029	0.0008	0.000162	TRIB2-LOC100506474
2	28365914	rs17006576	A	G	1.05897	0.0573	0.0102	1.671e-08	A	G	0.0844	0.0144	4.567e-09	A	G	0.0042	0.0008	4.23e-07	BRE
2	45878760	rs687914	T	G	0.928486	-0.0742	0.0121	8.885e-10	T	G	-0.0605	0.0148	4.191e-05	T	G	0	0.0007	0.9883	PRKCE
2	55933014	rs2627761	T	C	0.907828	-0.0967	0.011	1.367e-18	T	C	-0.075	0.0167	6.843e-06	T	C	0.0003	0.001	0.7787	PNPT1-EFEMP1
2	59523041	rs6713914	T	C	1.05633	0.0548	0.0091	1.421e-09	T	C	0.0162	0.0127	0.202	T	C	0	0.0002	0.8181	LOC101927285-MIR4432HG
2	66537344	rs4414666	T	G	0.923209	-0.0799	0.0098	2.803e-16	T	G	-0.0662	0.0133	6.517e-07	T	G	-0.0024	0.0008	0.002516	SPRED2-MIR4778
2	69411517	rs6732795	A	C	0.947432	-0.054	0.0098	3.471e-08	A	C	-0.0871	0.0131	2.725e-11	A	C	-0.0009	0.0008	0.2913	ANTXR1
2	71651939	rs12613800	A	T	1.06046	0.0587	0.0093	2.549e-10	A	T	0.0163	0.0128	0.203	A	T	0.0012	0.0008	0.1134	ZNF638
2	111638775	rs9308689	T	C	0.939037	-0.0629	0.0098	1.532e-10	T	C	0.0087	0.0133	0.51	T	C	-0.0051	0.0008	4.91e-11	ACOXL
2	153364527	rs1579050	A	G	0.913748	-0.0902	0.0103	1.593e-18	A	G	-0.1342	0.0128	1.394e-25	A	G	-0.0034	0.0008	6.31e-06	FMNL2
2	213760746	rs200621439	A	AT	0.866581	-0.1432	0.0201	1.207e-12	rs6755023*[G]	rs6755023[A]	-0.0798	0.0198	5.354e-05	NA	NA	NA	NA	NA	LOC102725079-MIR4776-1
3	24510794	rs9852634	A	C	1.0519	0.0506	0.0093	4.822e-08	A	C	-0.0057	0.0127	0.6525	A	C	0.0001	0.0006	0.8943	THRB
3	25581798	rs1286770	T	C	0.910556	-0.0937	0.0133	1.818e-12	T	C	-0.1002	0.0192	1.71e-07	T	C	-0.0023	0.0012	0.05921	RARB
3	56876596	rs1500708	T	C	0.937161	-0.0649	0.0108	2.132e-09	T	C	-0.0523	0.015	0.0004952	T	C	-0.0023	0.0009	0.01449	ARHGEF3
3	85172364	rs13101042	C	G	0.902668	-0.1024	0.0109	5.083e-21	C	G	-0.0429	0.0132	0.001213	C	G	-0.0018	0.0008	0.02173	CADM2
3	105073472	rs6437582	A	C	0.950754	-0.0505	0.0092	3.76e-08	A	C	-0.0487	0.013	0.0001743	A	C	-0.0007	0.0007	0.3164	MIR548A3-ALCAM
3	150065280	rs11710845	T	C	0.934167	-0.0681	0.0114	2.603e-09	T	C	-0.0619	0.0145	1.859e-05	T	C	-0.0003	0.0007	0.6763	LINC01214-TSC22D2
3	169239578	rs4361323	A	G	0.945634	-0.0559	0.009	5.284e-10	A	G	-0.0442	0.0129	0.0005863	A	G	-0.0023	0.0007	0.000983	MECOM
3	171821356	rs62283813	A	G	0.871534	-0.1375	0.016	1.025e-17	A	G	-0.1679	0.0291	7.427e-09	A	G	0.004	0.0018	0.0274	FNDC3B
3	186128816	rs56233426	A	G	1.09319	0.0891	0.0094	2.196e-21	A	G	0.1672	0.0131	2.901e-37	A	G	0.0022	0.0008	0.00669	DGKG-LOC253573
3	188066953	rs6787621	T	G	0.92626	-0.0766	0.0101	2.947e-14	T	G	-0.0823	0.0146	1.867e-08	T	G	0.0009	0.0007	0.2082	LPP
4	7904363	rs938604	A	G	0.866407	-0.1434	0.0096	7.875e-51	A	G	-0.1409	0.013	2.987e-27	A	G	-0.003	0.0008	0.00022	AFAP1
4	54027595	rs10517281	A	G	1.07444	0.0718	0.0112	1.699e-10	A	G	0.0568	0.0163	0.0005099	A	G	0.0009	0.0009	0.3381	SCFD2
4	89752276	rs57400569	A	G	0.944216	-0.0574	0.0105	4.219e-08	A	G	-0.0509	0.0157	0.001164	A	G	-0.0013	0.0008	0.1236	FAM13A
4	111963719	rs17527016	T	C	0.92589	-0.077	0.012	1.6e-10	T	C	-0.0529	0.0153	0.0005515	T	C	-0.0012	0.001	0.252	PITX2-C4orf32
4	184779187	rs6552711	T	G	1.05527	0.0538	0.0091	3.879e-09	T	G	0.0403	0.0129	0.001734	T	G	0.0001	0.0008	0.9146	STOX2
5	14814883	rs31916	A	G	1.06876	0.0665	0.0101	5.447e-11	A	G	0.0991	0.0142	3.165e-12	A	G	0.0024	0.0008	0.004283	ANKH
5	55783678	rs112142644	A	G	1.13917	0.1303	0.0162	1.015e-15	A	G	-0.012	0.0326	0.7123	A	G	0.0079	0.002	6.28e-05	LOC102467147-C5orf67
6	1548369	rs2745572	A	G	1.11371	0.1077	0.0097	1.292e-28	A	G	0.1325	0.0136	2.663e-22	A	G	0.0044	0.0008	1.11e-07	FOXF2-FOXCUT
6	29806901	rs407238	C	G	0.93426	-0.068	0.0097	2.714e-12	C	G	-0.0561	0.0143	8.85e-05	C	G	0.0011	0.0008	0.174	HLA-G-HLA-H
6	36570366	rs7344	T	C	0.917778	-0.0858	0.0102	5.721e-17	T	C	0.0266	0.0154	0.08522	T	C	-0.0055	0.0009	1.24e-09	SRSF3
6	45919758	rs3777588	A	G	1.0577	0.0561	0.0098	9.358e-09	A	G	0.0534	0.0132	5.592e-05	A	G	-0.0003	0.0008	0.6731	CLIC5
6	51414922	rs72904286	T	C	0.850781	-0.1616	0.015	4.579e-27	T	C	-0.1574	0.0212	1.103e-13	T	C	-0.0005	0.0012	0.6699	TFAP2B-PKHD1
6	122645298	rs7760346	A	C	0.951229	-0.05	0.0091	4.711e-08	A	C	0.0106	0.013	0.4122	A	C	-0.0032	0.0008	2.04e-05	GJA1-HSF2
6	134372150	rs2811688	C	G	0.946296	-0.0552	0.0093	2.557e-09	C	G	-0.064	0.0127	4.322e-07	C	G	-0.0013	0.0009	0.1213	SLC2A12
6	136462744	rs4612174	T	G	1.09461	0.0904	0.0094	7.289e-22	T	G	0.1027	0.0131	5.079e-15	T	G	0.0016	0.0008	0.03975	PDE7B
6	158971266	rs13194719	A	G	1.06014	0.0584	0.0092	2.21e-10	A	G	0.0447	0.0128	0.0004711	A	G	0.0004	0.0007	0.504	TMEM181
6	170454915	rs2935057	A	G	1.08426	0.0809	0.0124	5.759e-11	A	G	0.1111	0.0195	1.297e-08	A	G	0.0012	0.001	0.2258	LINC00574-LOC102724511
7	11679113	rs12699251	A	G	0.925705	-0.0772	0.0095	4.193e-16	A	G	-0.0513	0.0132	9.98e-05	A	G	0	0.0008	0.9975	THSD7A
7	28401455	rs2191828	C	G	1.08242	0.0792	0.0126	3.743e-10	C	G	-0.0226	0.0209	0.2792	C	G	0.0056	0.0012	6.6e-06	CREB5
7	35961137	rs6957752	T	C	1.05401	0.0526	0.0095	3.629e-08	T	C	0.0307	0.0135	0.02298	T	C	0.0032	0.0008	6.39e-05	SEPT7-LOC101928618
7	39077397	rs10248136	T	C	1.06014	0.0584	0.0095	7.737e-10	T	C	0.0617	0.0127	1.228e-06	T	C	0.001	0.0007	0.1707	POU6F2
7	80845529	rs59101260	G	GA	1.09308	0.089	0.0132	1.768e-11	rs327736**[C]	rs327736**[T]	0.0831	0.0132	3.066e-10	G	GA	0.0019	0.0012	0.1065	SEMA3C-LOC105369146
7	82949529	rs7805468	T	G	1.06375	0.0618	0.0091	1.21e-11	T	G	0.0581	0.0129	6.502e-06	T	G	-0.0007	0.0008	0.419	PCLO-SEMA3E
7	103624813	rs12667675	A	G	1.07423	0.0716	0.0123	6.621e-09	A	G	0.057	0.0183	0.001872	A	G	0.0015	0.0012	0.2096	RELN
7	116162306	rs10257125	A	T	0.890921	-0.1155	0.011	7.147e-26	A	T	-0.222	0.0142	5.309e-55	A	T	-0.0037	0.0009	1.49e-05	CAV1
7	117636111	rs10230941	C	G	0.926631	-0.0762	0.0101	4.492e-14	C	G	-0.0856	0.0133	1.389e-10	C	G	-0.0018	0.0007	0.01266	CTTNBP2-LSM8
7	134520521	rs10237321	A	C	0.94535	-0.0562	0.0095	3.922e-09	A	C	-0.0261	0.0131	0.04645	A	C	0	0.0001	0.8952	CALD1
7	151505698	rs62478245	T	C	1.1721	0.1588	0.0276	8.952e-09	T	C	0.0429	0.0359	0.2314	T	C	-0.0016	0.0018	0.3745	PRKAG2
8	6377141	rs2515437	C	G	0.891366	-0.115	0.0197	5.605e-09	C	G	-0.0871	0.0271	0.001321	C	G	-0.0002	0.002	0.9333	MCPH1
8	30454209	rs35740987	CA	C	1.06812	0.0659	0.0111	2.98e-09	rs35220810***[G]	rs35220810***[A]	0.0279	0.0129	0.03044	NA	NA	NA	NA	NA	GTF2E2
8	108273318	rs2514879	T	G	0.881086	-0.1266	0.0129	1.198e-22	T	G	-0.2157	0.0197	5.592e-28	T	G	-0.002	0.0012	0.1083	ANGPT1
8	124554317	rs62521288	A	T	0.877569	-0.1306	0.0202	1.053e-10	A	T	-0.1886	0.0257	2.086e-13	A	T	-0.0006	0.0012	0.6336	FBXO32
9	22051670	rs944801	C	G	1.2663	0.2361	0.01	3.71e-123	C	G	0.0153	0.0128	0.2325	C	G	0.0146	0.0007	3.43e-88	CDKN2B-AS1
9	107695539	rs2472494	T	C	1.19459	0.1778	0.0092	9.379e-83	T	C	0.2038	0.0148	3.31e-43	T	C	0.0033	0.0007	6.99e-06	ABCA1-SLC44A1
9	113312231	rs61751937	C	G	1.18376	0.1687	0.0295	1.052e-08	C	G	0.1584	0.0395	6.032e-05	C	G	0.0006	0.001	0.5399	SVEP1
9	129390800	rs3829849	T	C	0.87529	-0.1332	0.0103	1.389e-38	T	C	-0.1516	0.0132	9.838e-31	T	C	-0.0034	0.0007	4.28e-06	LMX1B
9	136131188	rs8176749	T	C	1.10186	0.097	0.0148	5.522e-11	T	C	0.162	0.0261	5.677e-10	T	C	0.0094	0.0015	7.84e-10	ABO
10	10840849	rs6602453	A	C	1.0594	0.0577	0.0098	3.383e-09	A	C	0.0415	0.0133	0.001856	A	C	0.0017	0.0008	0.02369	SFTA1P
10	60326910	rs1658436	A	G	0.915944	-0.0878	0.0091	6.034e-22	A	G	-0.0516	0.0127	5.086e-05	A	G	-0.0038	0.0007	4.09e-07	BICC1
10	78282063	rs2637250	T	C	1.05054	0.0493	0.009	4.661e-08	T	C	0.0363	0.0127	0.004364	T	C	0.0003	0.0005	0.5954	C10orf11
10	94929116	rs10882167	T	C	1.07122	0.0688	0.01	5.169e-12	T	C	-0.0197	0.0129	0.1266	T	C	0.0039	0.0008	2.03e-07	CYP26A1-MYOF
10	96023077	rs57866767	T	C	0.934541	-0.0677	0.009	3.765e-14	T	C	-0.0536	0.0129	3.109e-05	T	C	-0.0053	0.0008	3.74e-12	PLCE1
10	115546535	rs72837408	A	G	0.945634	-0.0559	0.0097	9.383e-09	A	G	-0.018	0.0141	0.2005	A	G	0.0002	0.0008	0.8058	PLEKHS1
10	126278648	rs10430737	T	C	1.06131	0.0595	0.0094	2.319e-10	T	C	-0.001	0.0132	0.9395	T	C	0.0013	0.0007	0.07973	LHPP
11	17011176	rs4141194	A	C	1.06705	0.0649	0.0099	4.534e-11	A	C	0.1143	0.0141	4.184e-16	A	C	0.0009	0.001	0.3416	PLEKHA7
11	47469439	rs7111873	A	G	1.07627	0.0735	0.0097	4.362e-14	A	G	0.1072	0.0141	2.494e-14	A	G	-0.0008	0.0008	0.311	RAPSN
11	65337251	rs1346	A	T	1.0921	0.0881	0.0122	5.047e-13	A	T	0.0457	0.0161	0.004503	A	T	0.0103	0.0009	4e-28	SSSCA1
11	86368106	rs10792871	T	C	1.12142	0.1146	0.0142	6.488e-16	T	C	0.155	0.023	1.647e-11	T	C	0.0057	0.0014	3.97e-05	ME3
11	102064834	rs7120067	A	C	1.05496	0.0535	0.0095	1.597e-08	A	C	-0.0119	0.0135	0.3792	A	C	0.0018	0.0008	0.03086	YAP1
11	115039683	rs10444329	A	G	0.93885	-0.0631	0.0113	2.36e-08	A	G	-0.0334	0.017	0.04877	A	G	0	0	0.7728	CADM1
11	120198093	rs1893261	A	G	1.08904	0.0853	0.0093	4.339e-20	A	G	0.0947	0.0131	4.774e-13	A	G	0.0009	0.0006	0.1641	TMEM136
11	128380742	rs7924522	A	C	1.07993	0.0769	0.0101	2.131e-14	A	C	0.1057	0.0135	3.994e-15	A	C	0.0017	0.0007	0.0189	ETS1
11	130282078	rs2875238	T	C	0.935289	-0.0669	0.0108	5.019e-10	T	C	-0.0137	0.0134	0.3098	T	C	-0.0087	0.0008	1.07e-28	ADAMTS8
12	28203245	rs7972874	A	T	0.937536	-0.0645	0.0113	1.122e-08	A	T	-0.0293	0.0146	0.04432	A	T	-0.0015	0.0009	0.09901	PTHLH-CCDC91
12	83948055	rs324788	T	C	0.928579	-0.0741	0.0095	8.239e-15	T	C	0.0081	0.013	0.5327	T	C	-0.0147	0.0008	5.77e-83	TMTC2-SLC6A15
12	107219308	rs1037013	A	G	1.0539	0.0525	0.0092	9.816e-09	A	G	0.0077	0.0128	0.5502	A	G	0.0055	0.0007	4.97e-14	RIC8B
12	111932800	rs7137828	T	C	1.07004	0.0677	0.0108	3.324e-10	T	C	0.0666	0.0129	2.623e-07	T	C	0.0041	0.0008	7.14e-08	ATXN2
13	22673870	rs4769194	A	G	1.08948	0.0857	0.0107	1.238e-15	A	G	0.0586	0.0169	0.000513	A	G	0.0027	0.0009	0.001736	LINC00424-LINC00540
13	73639371	rs9530143	A	G	0.941106	-0.0607	0.0101	2.005e-09	A	G	-0.0594	0.0138	1.728e-05	A	G	-0.0014	0.0008	0.09251	KLF5
13	76258720	rs9544024	A	G	0.9337	-0.0686	0.0101	1.113e-11	A	G	-0.0885	0.0127	3.094e-12	A	G	-0.0029	0.0008	0.000199	LMO7
13	110777939	rs2218471	C	G	0.944122	-0.0575	0.0101	1.387e-08	C	G	-0.0044	0.0131	0.7385	C	G	-0.0042	0.0008	4.89e-08	LINC00396-COL4A1
14	53960089	rs12433661	A	G	1.05929	0.0576	0.0092	3.207e-10	A	G	0.0188	0.0128	0.1429	A	G	0.0052	0.0007	3.89e-13	LOC101927620-MIR5580
14	60976537	rs33912345	A	C	0.851633	-0.1606	0.0096	2.177e-62	A	C	-0.0086	0.013	0.5088	A	C	-0.0073	0.0008	1.91e-21	SIX6
14	75084829	rs754458	A	G	1.06035	0.0586	0.0093	3.083e-10	A	G	0.0572	0.0127	6.783e-06	A	G	-0.0017	0.0007	0.01614	LTBP2-AREL1
14	76371658	rs4903352	C	G	1.07401	0.0714	0.0117	9.6e-10	C	G	0.0228	0.0172	0.1855	C	G	0.0022	0.0009	0.01418	TTLL5
14	95956875	rs72692789	T	C	1.0968	0.0924	0.0169	4.252e-08	T	C	0.0241	0.0205	0.2403	T	C	0.0046	0.0012	0.000218	SYNE3-SNHG10
15	57553832	rs2431023	A	T	1.07026	0.0679	0.01	1.065e-11	A	T	0.0723	0.0129	1.94e-08	A	T	0.0023	0.0008	0.007291	TCF12
15	61947280	rs12438742	C	G	0.94365	-0.058	0.0094	6.722e-10	C	G	-0.1056	0.0128	2.059e-16	C	G	-0.0007	0.0007	0.3164	RORA-VPS13C
15	67025403	rs2439386	T	C	0.935663	-0.0665	0.0103	1.087e-10	T	C	-0.0453	0.014	0.001181	T	C	-0.0023	0.001	0.01454	SMAD6
15	74221298	rs1550437	T	C	0.913657	-0.0903	0.0115	4.615e-15	T	C	-0.0514	0.017	0.002472	T	C	-0.0029	0.001	0.005766	LOXL1-AS1
15	92331707	rs8038628	A	G	0.935289	-0.0669	0.0121	2.907e-08	A	G	-0.0136	0.0188	0.468	A	G	-0.0047	0.0011	1.98e-05	CRAT37-SLCO3A1
16	51601948	rs114367221	T	C	1.11182	0.106	0.0177	2.243e-09	T	C	-0.0499	0.0238	0.03562	T	C	0.0156	0.0015	1.23e-26	SALL1-LINC01571
16	59995564	rs190157577	A	G	0.390081	-0.9414	0.159	3.227e-09	A	G	0.3836	0.2287	0.0934	NA	NA	NA	NA	NA	LINC02141/LOC105371299
16	65067443	rs12447201	T	C	0.943273	-0.0584	0.0099	4.219e-09	T	C	-0.0979	0.0133	1.524e-13	T	C	0.0013	0.0008	0.07363	CDH11
16	77661732	rs280875	T	C	0.901676	-0.1035	0.0181	1.013e-08	T	C	-0.1345	0.0237	1.313e-08	T	C	-0.0044	0.0014	0.001851	ADAMTS18-NUDT7
17	2201944	rs216197	A	G	0.941576	-0.0602	0.0096	3.075e-10	A	G	-0.0487	0.0133	0.0002623	A	G	-0.0028	0.0008	0.000606	SMG6
17	10031183	rs9913911	A	G	1.14912	0.139	0.0095	7.256e-49	A	G	0.2122	0.0133	1.592e-57	A	G	0.003	0.0008	8.87e-05	GAS7
17	44025888	rs114919114	A	C	0.929415	-0.0732	0.0119	8.795e-10	rs62063276****[T]	rs62063276****[G]	-0.0541	0.0168	0.001312	A	C	-0.0016	0.0033	0.6278	MAPT
17	45695242	17:45695242_AT_A	A	AT	0.938568	-0.0634	0.011	9.237e-09	A	AT	-0.0008	0.0548	0.9882	NA	NA	NA	NA	NA	NPEPPS
17	59239221	rs11868441	A	G	1.0781	0.0752	0.0111	1.488e-11	A	G	0.0695	0.0164	2.347e-05	A	G	-0.0039	0.0009	1.11e-05	BCAS3
20	6470094	rs2326788	A	G	0.916036	-0.0877	0.0095	1.776e-20	A	G	-0.0051	0.0131	0.6971	A	G	-0.0109	0.0008	1.48e-44	CASC20
20	38074218	rs6101546	T	C	1.05897	0.0573	0.0093	6.933e-10	T	C	0.0358	0.0127	0.004714	T	C	0.0006	0.0007	0.4131	LOC339568-LINC01370
20	45534053	rs6124885	A	G	0.918604	-0.0849	0.0153	2.783e-08	A	G	-0.1095	0.028	9.433e-05	A	G	-0.0023	0.0015	0.127	EYA2
21	27216839	rs13049669	A	T	0.909646	-0.0947	0.0158	2.226e-09	A	T	-0.0995	0.0242	4.006e-05	A	T	-0.0035	0.0014	0.01464	GABPA-APP
21	40406630	rs13050568	A	G	1.06791	0.0657	0.0108	1.269e-09	A	G	0.0041	0.0156	0.7927	A	G	0.0019	0.0009	0.04742	LOC101928435-PSMG1
22	19870147	rs8141610	T	C	0.878008	-0.1301	0.0149	3.099e-18	T	C	-0.0997	0.018	3.241e-08	T	C	-0.0015	0.001	0.133	TXNRD2
22	29108229	rs5752776	A	G	0.926631	-0.0762	0.0104	2.557e-13	A	G	0.0069	0.0137	0.6125	A	G	-0.0145	0.0008	2.51e-69	CHEK2
22	38176979	rs5750494	T	G	1.08047	0.0774	0.0094	2.415e-16	T	G	0.0886	0.0133	2.519e-11	T	G	0.0074	0.0008	8.06e-21	TRIOBP
23	3329593	rs12846405	T	C	1.0557	0.0542	0.0091	2.63e-09	NA	NA	NA	NA	NA	T	C	0.0012	0.0007	0.09539	MXRA5-PRKX
23	13954397	rs66819623	T	C	1.07993	0.0769	0.0097	1.829e-15	NA	NA	NA	NA	NA	T	C	-0.0004	0.0015	0.7576	GPM6B
23	43940827	rs17146835	T	C	0.93286	-0.0695	0.0097	6.696e-13	NA	NA	NA	NA	NA	T	C	-0.0044	0.0008	1.9e-07	NDP-EFHC2
23	109786110	rs12013156	A	C	0.930345	-0.0722	0.0103	2.015e-12	NA	NA	NA	NA	NA	A	C	-0.001	0.0007	0.1774	TDGF1P3-CHRDL1

## Sheet: Supplementary Data 6
CHR	SNP	Position	Effect allele	Other allele	Freq	info	GCIPL_beta	GCIPL_se	GCIPL_p	RNFL_beta	RNFL_se	RNFL_p	IOP_P	VCDR_P	Gene
1	rs172531	8495590	G	A	0.335	0.994	0.004	0.05	0.933	0.028	0.038	0.459	0.2986	5.4e-06	LOC102724552
1	rs4652902	36612955	A	C	0.772	0.997	-0.059	0.057	0.301	0.043	0.043	0.32	1.11e-07	0.8845	TRAPPC3
1	rs10908363	38076621	T	C	0.526	0.995	-0.026	0.048	0.592	0.036	0.036	0.324	7.18e-08	0.9856	RSPO1
1	rs941125	54123873	T	G	0.374	0.989	-0.007	0.049	0.884	0.029	0.038	0.447	0.06457	0.2234	GLIS1
1	rs4076000	68837169	C	A	0.603	0.997	-0.031	0.049	0.53	-0.051	0.037	0.167	0.4465	5.55e-05	WLS-RPE65
1	rs12139208	88213014	C	T	0.619	0.997	-0.014	0.049	0.78	-0.12	0.037	0.0013	2.92e-08	0.1267	LINC01364-PKN2-AS1
1	rs1192415	92077097	A	G	0.812	1	-0.045	0.061	0.461	0.017	0.046	0.72	0.04107	2.84e-23	CDC7-TGFBR3
1	rs12566440	101095202	G	A	0.361	0.999	0.09	0.05	0.07	0.097	0.038	0.0101	0.0002258	0.03637	LINC01349
1	rs3753841	103379918	A	G	0.613	1	0.093	0.049	0.0568	0.022	0.037	0.554	0.3394	0.007803	COL11A1
1	rs1106287	113242122	G	T	0.205	0.997	-0.165	0.059	0.0053	-0.077	0.045	0.0859	1.5e-10	0.1268	RHOC
1	rs4542196	162679145	A	G	0.738	0.992	-0.037	0.054	0.495	0.026	0.041	0.534	0.6217	0.1517	DDR2
1	rs2790053	165737704	G	C	0.876	0.997	0.087	0.072	0.231	-0.009	0.055	0.875	4.58e-67	0.01028	LOC100147773
1	rs6667536	219215137	A	G	0.066	0.993	0.176	0.096	0.0678	0.117	0.073	0.109	3.05e-12	0.41	MIR548F3
2	rs12623251	12951321	T	C	0.365	0.999	0.024	0.049	0.633	-0.026	0.038	0.482	0.3199	0.004465	TRIB2-LOC100506474
2	rs17006576	28365914	A	G	0.259	0.999	-0.06	0.054	0.267	-0.017	0.041	0.679	4.57e-09	0.04214	BRE
2	rs687914	45878760	T	G	0.252	0.989	-0.014	0.055	0.805	-0.005	0.042	0.901	4.19e-05	0.4447	PRKCE
2	rs2627761	55933014	T	C	0.824	0.993	0.021	0.063	0.742	-0.026	0.048	0.586	6.84e-06	0.3817	PNPT1-EFEMP1
2	rs6713914	59523041	C	T	0.456	0.999	-0.027	0.048	0.566	0.027	0.036	0.451	0.202	0.8183	LOC101927285-MIR4432HG
2	rs4414666	66537344	T	G	0.63	0.988	0.021	0.05	0.664	0.008	0.038	0.831	6.52e-07	0.5162	SPRED2-MIR4778
2	rs6732795	69411517	C	A	0.39	0.99	0.028	0.049	0.566	-0.02	0.037	0.599	2.73e-11	0.8279	ANTXR1
2	rs12613800	71651939	A	T	0.424	0.999	0.042	0.048	0.384	-0.058	0.037	0.117	0.203	0.822	ZNF638
2	rs9308689	111638775	T	C	0.362	0.996	-0.018	0.05	0.718	-0.034	0.038	0.37	0.51	1.33e-05	ACOXL
2	rs1579050	153364527	G	A	0.577	0.998	-0.054	0.048	0.266	0.013	0.037	0.733	1.39e-25	0.9342	FMNL2
3	rs9852634	24510794	C	A	0.475	0.977	-0.004	0.048	0.926	-0.007	0.037	0.858	0.6525	0.4617	THRB
3	rs1286770	25581798	T	C	0.125	0.988	0.072	0.072	0.317	0.076	0.055	0.164	1.71e-07	0.098	RARB
3	rs1500708	56876596	C	T	0.766	0.982	-0.034	0.057	0.543	0.037	0.043	0.391	0.0004952	0.01681	ARHGEF3
3	rs13101042	85172364	C	G	0.627	0.969	-0.013	0.05	0.792	0.015	0.038	0.692	0.001213	0.482	CADM2
3	rs6437582	105073472	C	A	0.605	0.994	-0.054	0.049	0.27	0.001	0.037	0.971	0.0001743	0.8145	MIR548A3-ALCAM
3	rs11710845	150065280	T	C	0.258	1	0.208	0.054	0.000131	0.139	0.041	0.000791	1.86e-05	0.5962	LINC01214-TSC22D2
3	rs4361323	169239578	G	A	0.416	0.999	-0.002	0.049	0.97	0.1	0.037	0.00665	0.0005863	0.01968	MECOM
3	rs62283813	171821356	G	A	0.053	0.997	-0.148	0.107	0.165	-0.027	0.081	0.735	7.43e-09	0.1866	FNDC3B
3	rs56233426	186128816	G	A	0.54	0.966	0.006	0.048	0.908	-0.015	0.037	0.691	2.9e-37	0.1596	DGKG-LOC253573
3	rs6787621	188066953	G	T	0.74	0.989	0	0.055	0.997	-0.064	0.042	0.124	1.87e-08	0.5855	LPP
4	rs938604	7904363	A	G	0.618	0.998	0.028	0.049	0.562	0.013	0.037	0.721	2.99e-27	0.007433	AFAP1
4	rs10517281	54027595	G	A	0.186	0.999	-0.044	0.061	0.467	0.002	0.046	0.969	0.0005099	0.1223	SCFD2
4	rs57400569	89752276	A	G	0.217	1	-0.07	0.057	0.225	-0.12	0.044	0.0059	0.001164	0.5635	FAM13A
4	rs17527016	111963719	T	C	0.254	1	-0.01	0.055	0.853	0.039	0.042	0.353	0.0005515	0.6753	PITX2-C4orf32
4	rs6552711	184779187	T	G	0.557	0.996	-0.034	0.048	0.478	-0.04	0.036	0.272	0.001734	0.9434	STOX2
5	rs31916	14814883	G	A	0.279	1	0.035	0.053	0.509	0.036	0.04	0.374	3.17e-12	0.8188	ANKH
5	rs112142644	55783678	A	G	0.044	0.79	0.061	0.13	0.64	0.019	0.099	0.846	0.7123	0.0007416	LOC102467147-C5orf67
6	rs2745572	1548369	G	A	0.335	0.99	0.068	0.051	0.182	-0.01	0.039	0.794	2.66e-22	1.06e-06	FOXF2-FOXCUT
6	rs7344	36570366	C	T	0.22	0.997	0.014	0.057	0.811	0.027	0.043	0.533	0.08522	9.88e-05	SRSF3
6	rs3777588	45919758	A	G	0.632	1	0.096	0.049	0.0517	0.004	0.038	0.909	5.59e-05	0.3387	CLIC5
6	rs72904286	51414922	T	C	0.1	0.991	0.162	0.08	0.0419	-0.038	0.061	0.525	1.1e-13	0.1826	TFAP2B-PKHD1
6	rs7760346	122645298	C	A	0.384	1	-0.035	0.049	0.473	0.01	0.037	0.792	0.4122	0.008999	GJA1-HSF2
6	rs2811688	134372150	G	C	0.497	0.992	-0.016	0.048	0.744	-0.015	0.036	0.676	4.32e-07	0.07112	SLC2A12
6	rs4612174	136462744	G	T	0.375	0.997	0.008	0.049	0.864	0.058	0.038	0.12	5.08e-15	0.01557	PDE7B
6	rs13194719	158971266	G	A	0.543	0.993	-0.001	0.048	0.98	0.031	0.036	0.397	0.0004711	0.9191	TMEM181
6	rs2935057	170454915	G	A	0.879	0.997	0.005	0.073	0.945	0.032	0.055	0.562	1.3e-08	0.0919	LINC00574-LOC102724511
7	rs12699251	11679113	G	A	0.434	0.967	0.02	0.049	0.681	0.032	0.037	0.383	9.98e-05	0.04526	THSD7A
7	rs2191828	28401455	G	C	0.896	0.997	0.014	0.078	0.855	-0.104	0.059	0.0803	0.2792	0.02392	CREB5
7	rs6957752	35961137	T	C	0.608	0.998	-0.014	0.049	0.78	0.003	0.037	0.927	0.02298	0.001441	SEPT7-LOC101928618
7	rs10248136	39077397	T	C	0.517	0.993	0.189	0.048	7.06e-05	0.036	0.036	0.326	1.23e-06	0.308	POU6F2
7	rs7805468	82949529	G	T	0.571	0.999	-0.052	0.048	0.282	0.041	0.037	0.26	6.5e-06	0.9301	PCLO-SEMA3E
7	rs12667675	103624813	G	A	0.144	0.984	0.002	0.069	0.972	-0.004	0.052	0.937	0.001872	0.5149	RELN
7	rs10257125	116162306	T	A	0.274	0.996	0	0.053	1	0.001	0.041	0.989	5.31e-55	0.003086	CAV1
7	rs10230941	117636111	G	C	0.36	0.988	0.004	0.05	0.929	-0.028	0.038	0.463	1.39e-10	0.002451	CTTNBP2-LSM8
7	rs10237321	134520521	A	C	0.368	0.995	-0.037	0.049	0.453	-0.054	0.038	0.152	0.04645	0.9956	CALD1
7	rs62478245	151505698	T	C	0.037	0.973	0.2	0.127	0.116	-0.012	0.097	0.905	0.2314	0.183	PRKAG2
8	rs2515437	6377141	G	C	0.058	0.998	0.172	0.102	0.0917	0.091	0.078	0.245	0.001321	0.2703	MCPH1
8	rs2514879	108273318	G	T	0.878	1	0.045	0.072	0.533	0.051	0.055	0.359	5.59e-28	0.09294	ANGPT1
8	rs62521288	124554317	T	A	0.064	0.996	0.116	0.097	0.231	0.06	0.074	0.413	2.09e-13	0.02681	FBXO32
9	rs944801	22051670	C	G	0.573	0.999	-0.091	0.048	0.0603	-0.095	0.037	0.00946	0.2325	1.06e-34	CDKN2B-AS1
9	rs2472494	107695539	C	T	0.555	0.98	-0.017	0.048	0.722	-0.006	0.037	0.878	3.31e-43	7.11e-05	ABCA1-SLC44A1
9	rs61751937	113312231	C	G	0.029	1	0.094	0.142	0.507	-0.081	0.108	0.454	6.03e-05	0.2367	SVEP1
9	rs3829849	129390800	T	C	0.369	0.998	-0.026	0.049	0.593	0	0.038	0.995	9.84e-31	0.007913	LMX1B
9	rs8176749	136131188	T	C	0.06	1	-0.12	0.1	0.23	-0.034	0.076	0.656	5.68e-10	3.59e-05	ABO
10	rs6602453	10840849	C	A	0.664	0.998	0.11	0.05	0.0285	0.004	0.038	0.914	0.001856	0.0537	SFTA1P
10	rs1658436	60326910	A	G	0.545	0.998	-0.026	0.048	0.594	-0.006	0.036	0.877	5.09e-05	0.001089	BICC1
10	rs2637250	78282063	C	T	0.454	0.995	-0.039	0.048	0.413	-0.009	0.036	0.797	0.004364	0.8207	C10orf11
10	rs10882167	94929116	T	C	0.412	0.991	-0.152	0.049	0.00179	-0.025	0.037	0.497	0.1266	0.002693	CYP26A1-MYOF
10	rs57866767	96023077	C	T	0.435	0.999	-0.007	0.048	0.892	-0.015	0.037	0.688	3.11e-05	5.64e-10	PLCE1
10	rs72837408	115546535	G	A	0.328	0.976	-0.049	0.052	0.343	-0.055	0.039	0.164	0.2005	0.4082	PLEKHS1
10	rs10430737	126278648	C	T	0.63	0.986	-0.059	0.049	0.234	-0.01	0.038	0.782	0.9395	0.9526	LHPP
11	rs4141194	17011176	A	C	0.289	0.998	0.296	0.053	1.96e-08	0.161	0.04	5.88e-05	4.18e-16	0.9094	PLEKHA7
11	rs7111873	47469439	G	A	0.716	0.999	-0.098	0.053	0.0635	-0.058	0.04	0.151	2.49e-14	0.9111	RAPSN
11	rs1346	65337251	T	A	0.198	0.999	0.056	0.06	0.352	-0.022	0.046	0.626	0.004503	7.51e-18	SSSCA1
11	rs10792871	86368106	C	T	0.92	0.999	0.035	0.088	0.689	0.056	0.067	0.404	1.65e-11	0.0002156	ME3
11	rs7120067	102064834	A	C	0.331	0.996	0.063	0.051	0.212	-0.01	0.039	0.794	0.3792	0.05277	YAP1
11	rs10444329	115039683	A	G	0.832	0.988	-0.041	0.064	0.521	-0.055	0.049	0.259	0.04877	0.9712	CADM1
11	rs1893261	120198093	A	G	0.372	1	0.075	0.049	0.126	-0.039	0.037	0.297	4.77e-13	0.1839	TMEM136
11	rs7924522	128380742	A	C	0.661	0.996	-0.003	0.05	0.959	-0.049	0.038	0.201	3.99e-15	0.02185	ETS1
11	rs2875238	130282078	C	T	0.637	0.982	-0.097	0.05	0.0527	-0.006	0.038	0.877	0.3098	2.25e-08	ADAMTS8
12	rs7972874	28203245	A	T	0.26	0.988	-0.015	0.055	0.784	-0.045	0.042	0.283	0.04432	0.536	PTHLH-CCDC91
12	rs324788	83948055	C	T	0.556	0.997	-0.061	0.048	0.202	-0.019	0.037	0.599	0.5327	1.85e-17	TMTC2-SLC6A15
12	rs1037013	107219308	G	A	0.426	0.999	-0.039	0.048	0.421	-0.078	0.037	0.0333	0.5502	7.83e-07	RIC8B
12	rs7137828	111932800	T	C	0.516	0.997	0.039	0.048	0.411	0.048	0.036	0.19	2.62e-07	0.0009727	ATXN2
13	rs4769194	22673870	G	A	0.829	0.993	0.076	0.063	0.231	-0.035	0.048	0.469	0.000513	0.03396	LINC00424-LINC00540
13	rs9530143	73639371	A	G	0.316	1	0.007	0.051	0.892	0.007	0.039	0.862	1.73e-05	0.8425	KLF5
13	rs9544024	76258720	G	A	0.502	0.998	0.058	0.048	0.229	-0.015	0.036	0.676	3.09e-12	0.01223	LMO7
13	rs2218471	110777939	G	C	0.497	0.966	-0.044	0.048	0.361	-0.003	0.037	0.937	0.7385	0.09926	LINC00396-COL4A1
14	rs12433661	53960089	G	A	0.424	0.997	0.065	0.048	0.175	0.009	0.037	0.805	0.1429	4.56e-07	LOC101927620-MIR5580
14	rs33912345	60976537	A	C	0.609	1	0.081	0.049	0.0951	0.276	0.037	8.85e-14	0.5088	1.23e-13	SIX6
14	rs754458	75084829	A	G	0.491	0.998	0.156	0.048	0.00108	0.077	0.036	0.0338	6.78e-06	0.3162	LTBP2-AREL1
14	rs4903352	76371658	C	G	0.833	0.99	0.07	0.064	0.278	0.003	0.049	0.943	0.1855	0.09803	TTLL5
14	rs72692789	95956875	C	T	0.11	0.997	-0.076	0.076	0.315	-0.053	0.058	0.356	0.2403	0.2796	SYNE3-SNHG10
15	rs2431023	57553832	T	A	0.58	0.999	0.008	0.048	0.866	0.021	0.037	0.571	1.94e-08	0.174	TCF12
15	rs12438742	61947280	G	C	0.573	0.993	0.073	0.048	0.131	0.021	0.037	0.572	2.06e-16	0.2409	RORA-VPS13C
15	rs2439386	67025403	T	C	0.716	0.999	0.005	0.053	0.927	0.012	0.04	0.765	0.001181	0.05862	SMAD6
15	rs1550437	74221298	T	C	0.171	0.997	-0.125	0.063	0.0491	-0.001	0.048	0.99	0.002472	0.003844	LOXL1-AS1
15	rs8038628	92331707	G	A	0.139	0.993	-0.015	0.069	0.825	-0.042	0.053	0.428	0.468	0.003507	CRAT37-SLCO3A1
16	rs114367221	51601948	T	C	0.084	0.999	0.041	0.086	0.629	-0.104	0.065	0.112	0.03562	0.000141	SALL1-LINC01571
16	rs12447201	65067443	T	C	0.361	0.999	0.055	0.05	0.265	-0.03	0.038	0.422	1.52e-13	0.5984	CDH11
16	rs280875	77661732	T	C	0.919	0.983	0.179	0.088	0.0422	0.129	0.067	0.0553	1.31e-08	0.2325	ADAMTS18-NUDT7
17	rs216197	2201944	G	A	0.651	1	-0.009	0.05	0.856	-0.02	0.038	0.59	0.0002623	0.02866	SMG6
17	rs9913911	10031183	G	A	0.375	0.993	0.134	0.049	0.00646	0.045	0.037	0.231	1.59e-57	1.84e-07	GAS7
17	rs242559	44025888	A	C	0.76623	0.99282	-0.21409	0.056396	0.000147	-0.2013	0.042914	2.73e-06	0.001312	0.6375	MAPT
17	rs11868441	59239221	G	A	0.81	1	-0.157	0.061	0.00987	-0.112	0.046	0.0155	2.35e-05	0.0003566	BCAS3
20	rs2326788	6470094	A	G	0.37	0.993	0.031	0.05	0.535	-0.006	0.038	0.882	0.6971	2.99e-10	CASC20
20	rs6101546	38074218	C	T	0.523	0.998	0.028	0.047	0.56	-0.021	0.036	0.553	0.004714	0.4562	LOC339568-LINC01370
20	rs6124885	45534053	G	A	0.056	0.988	-0.199	0.103	0.0549	-0.119	0.079	0.132	9.43e-05	0.08826	EYA2
21	rs13049669	27216839	A	T	0.073	0.984	0.01	0.092	0.91	0.032	0.07	0.651	4.01e-05	0.06763	GABPA-APP
21	rs13050568	40406630	A	G	0.217	0.983	0.011	0.058	0.85	-0.051	0.044	0.249	0.7927	0.1397	LOC101928435-PSMG1
22	rs8141610	19870147	T	C	0.148	0.985	0.101	0.067	0.136	0.058	0.051	0.255	3.24e-08	0.1986	TXNRD2
22	rs5752776	29108229	G	A	0.679	1	-0.131	0.051	0.00971	-0.086	0.039	0.0261	0.6125	2.03e-20	CHEK2
22	rs5750494	38176979	G	T	0.626	0.996	0.048	0.049	0.325	-0.012	0.037	0.748	2.52e-11	4.05e-08	TRIOBP

## Sheet: Supplementary Data 7
POAG GWAS variant aligned to 1KG	RS ID POAG GWAS variant	LD proxy variant	Locus start	Locus end	Variant ID of top eCAVIAR result	RS ID top eCAVIAR results	Chr	Pos, b37	A1	A2	Prob in pCausalSet	CLPP	R2 relative to lead GWAS variant	Significant CLPP >0.01	Effect allele POAG	Other allele POAG	Effect POAG	StdErr POAG	Pvalue POAG	POAG effect allele match A1 in 1KG	Effect allele AD	Non Effect allele AD	Effect AD	StdErr AD	Pvalue AD	AD effect allele match A1 in 1KG	Relative direction effect POAG AD	POAG GWAS ancestry	AD GWAS
6:134372150:C:G	rs2811688	NA	134364060	134382456	6:134372711:G:T	rs2811689	6	134372711	T	G	0.499921	0.0031301	0.898539	FALSE	T	G	0.051	0.0094	6.668e-08	1	T	G	-0.0076	0.0143	0.5972	1	OPPOSITE	European POAG	Kunkle et al., 2019
6:134372150:C:G	rs2811688	NA	134364060	134382456	6:134372711:G:T	rs2811689	6	134372711	T	G	0.499854	0.00312601	0.898539	FALSE	T	G	0.051	0.0094	6.668e-08	1	T	G	-0.0076	0.0143	0.5972	1	OPPOSITE	Trans-ancestry POAG	Kunkle et al., 2019
6:136474794:T:A	rs9494457	NA	136370658	136505036	6:136501828:G:A	rs487278	6	136501828	A	G	0.488338	0.00298097	0.453802	FALSE	A	G	0.0716	0.0096	6.688e-14	1	A	G	0.0169	0.0154	0.2714	1	SAME	European POAG	Kunkle et al., 2019
6:136462744:T:G	rs4612174	NA	136370658	136505036	6:136481391:A:G	rs509342	6	136481391	G	A	0.488151	0.00295883	0.469211	FALSE	A	G	-0.0798	0.0102	4.135e-15	-1	A	G	-0.0216	0.0155	0.1639	-1	SAME	Trans-ancestry POAG	Kunkle et al., 2019
4:111963719:C:T	rs17527016	NA	111937018	112004976	4:111963719:C:T	rs17527016	4	111963719	T	C	0.503804	0.00252934	1	FALSE	T	C	-0.077	0.012	1.6e-10	1	T	C	0.0043	0.0198	0.8268	1	OPPOSITE	Trans-ancestry POAG	Kunkle et al., 2019
2:66537344:G:T	rs4414666	NA	66534211	66652714	2:66537344:G:T	rs4414666	2	66537344	T	G	0.499917	0.00246524	1	FALSE	T	G	-0.0799	0.0098	2.803e-16	1	T	G	0.0146	0.0149	0.3251	1	OPPOSITE	Trans-ancestry POAG	Kunkle et al., 2019
11:130282078:T:C	rs2875238	NA	130257825	130332338	11:130273230:A:T	rs11222084	11	130273230	T	A	0.499335	0.00237667	0.681534	FALSE	A	T	0.0582	0.0104	2.186e-08	-1	A	T	-0.0104	0.0154	0.5004	-1	OPPOSITE	Trans-ancestry POAG	Kunkle et al., 2019
3:188066953:T:G	rs6787621	NA	188011407	188069360	3:188066953:T:G	rs6787621	3	188066953	G	T	0.49998	0.00237264	1	FALSE	T	G	-0.0766	0.0101	2.947e-14	-1	T	G	-0.0181	0.0166	0.2747	-1	SAME	Trans-ancestry POAG	Kunkle et al., 2019
7:28401455:C:G	rs2191828	NA	28366412	28408134	7:28401455:C:G	rs2191828	7	28401455	G	C	0.498924	0.00233505	1	FALSE	C	G	0.0792	0.0126	3.743e-10	-1	C	G	0.0159	0.0234	0.4973	-1	SAME	Trans-ancestry POAG	Kunkle et al., 2019
22:29613441:G:T	rs7284245	NA	29540920	29620325	22:29616265:A:G	rs132384	22	29616265	G	A	0.500831	0.00220894	0.1561	FALSE	A	G	0.0642	0.0107	1.882e-09	-1	A	G	-0.0329	0.0195	0.09231	-1	OPPOSITE	European POAG	Kunkle et al., 2019
2:69411517:A:C	rs6732795	NA	69344594	69459151	2:69407732:T:C	rs11126221	2	69407732	C	T	0.500727	0.00220154	0.591673	FALSE	T	C	-0.0397	0.0094	2.513e-05	-1	T	C	0.0167	0.0143	0.2445	-1	OPPOSITE	Trans-ancestry POAG	Kunkle et al., 2019
17:10031183:A:G	rs9913911	NA	10006770	10035562	17:10029761:G:A	rs68107316	17	10029761	A	G	0.499935	0.00216962	0.52084	FALSE	A	G	-0.1043	0.0097	8.699e-27	1	A	G	0.0234	0.0147	0.1106	1	OPPOSITE	European POAG	Kunkle et al., 2019
17:10031183:A:G	rs9913911	NA	10006770	10035562	17:10029761:G:A	rs68107316	17	10029761	A	G	0.499984	0.00216541	0.52084	FALSE	A	G	-0.1043	0.0097	8.699e-27	1	A	G	0.0234	0.0147	0.1106	1	OPPOSITE	Trans-ancestry POAG	Kunkle et al., 2019
2:45878760:G:T	rs687914	NA	45863787	45950332	2:45864578:A:G	rs938662	2	45864578	G	A	0.499771	0.00210855	0.692383	FALSE	A	G	-0.063	0.0112	1.782e-08	-1	A	G	0	0.0163	0.9997	-1	OPPOSITE	Trans-ancestry POAG	Kunkle et al., 2019
4:184779187:G:T	rs6552711	NA	184763996	184841089	4:184794890:A:G	rs11735185	4	184794890	G	A	0.463788	0.00209394	0.33381	FALSE	A	G	-0.0532	0.0093	1.132e-08	-1	A	G	0.0058	0.0145	0.6897	-1	OPPOSITE	Trans-ancestry POAG	Kunkle et al., 2019
6:1548369:A:G	rs2745572	NA	1518773	1580213	6:1548369:A:G	rs2745572	6	1548369	G	A	0.500002	0.00206905	1	FALSE	A	G	0.1077	0.0097	1.292e-28	-1	A	G	-0.0015	0.0155	0.9253	-1	OPPOSITE	European POAG	Kunkle et al., 2019
6:1548369:A:G	rs2745572	NA	1518773	1580213	6:1548369:A:G	rs2745572	6	1548369	G	A	0.5	0.00206136	1	FALSE	A	G	0.1077	0.0097	1.292e-28	-1	A	G	-0.0015	0.0155	0.9253	-1	OPPOSITE	Trans-ancestry POAG	Kunkle et al., 2019
3:186128816:A:G	rs56233426	NA	186103439	186207417	3:186131600:T:A	rs9853115	3	186131600	A	T	0.497153	0.00202029	0.679215	FALSE	A	T	-0.0849	0.0095	2.846e-19	1	A	T	0.0015	0.0148	0.9184	1	OPPOSITE	Trans-ancestry POAG	Kunkle et al., 2019
3:186128816:A:G	rs56233426	NA	186103439	186207417	3:186134419:A:G	rs4588350	3	186134419	G	A	0.490808	0.00200053	0.296652	FALSE	A	G	-0.0544	0.0103	1.298e-07	-1	A	G	0.0114	0.0155	0.4634	-1	OPPOSITE	European POAG	Kunkle et al., 2019
1:113242122:T:G	rs1106287	NA	113022419	113254267	1:113205526:CTGT:C	1:113205526	1	113205526	C	CTGT	0.497826	0.00199866	0.747947	FALSE	CTGT	C	0.0437	0.0114	0.0001293	-1	CTGT	C	-0.0374	0.0161	0.01995	-1	OPPOSITE	Trans-ancestry POAG	Kunkle et al., 2019
21:40406630:G:A	rs13050568	NA	40382795	40452229	21:40404143:C:A	rs6517503	21	40404143	A	C	0.499191	0.00199259	0.834799	FALSE	A	C	-0.0619	0.0104	2.434e-09	1	A	C	0.0174	0.0165	0.2919	1	OPPOSITE	Trans-ancestry POAG	Kunkle et al., 2019
13:22673870:A:G	rs4769194	NA	22628988	22711688	13:22679011:T:G	rs6490697	13	22679011	G	T	0.470334	0.00198396	0.910683	FALSE	T	G	0.0866	0.0108	1.44e-15	-1	T	G	-0.0027	0.0192	0.886	-1	OPPOSITE	Trans-ancestry POAG	Kunkle et al., 2019
3:24510794:A:C	rs9852634	NA	24419559	24563363	3:24512855:G:A	rs4276130	3	24512855	A	G	0.499994	0.00197631	0.991819	FALSE	A	G	-0.0495	0.0092	7.995e-08	1	A	G	-0.0165	0.0145	0.2544	1	SAME	Trans-ancestry POAG	Kunkle et al., 2019
4:111963719:C:T	rs17527016	NA	111937018	112004976	4:111963719:C:T	rs17527016	4	111963719	T	C	0.399448	0.00197172	1	FALSE	T	C	-0.077	0.012	1.6e-10	1	T	C	0.0043	0.0198	0.8268	1	OPPOSITE	European POAG	Kunkle et al., 2019
5:55783678:G:A	rs112142644	NA	55765866	55828423	5:55783678:G:A	rs112142644	5	55783678	A	G	0.500032	0.00196617	1	FALSE	A	G	0.1303	0.0162	1.015e-15	1	A	G	-0.0414	0.0255	0.105	1	OPPOSITE	Trans-ancestry POAG	Kunkle et al., 2019
7:80845529:G:GA	rs59101260	NA	80834923	80909100	7:80864520:T:A	rs327747	7	80864520	A	T	0.500217	0.00193103	0.588486	FALSE	A	T	0.0577	0.01	8.099e-09	1	A	T	-0.006	0.0146	0.68	1	OPPOSITE	Trans-ancestry POAG	Kunkle et al., 2019
9:22051670:G:C	rs944801	NA	21949005	22125913	9:22040765:C:T	rs1333037	9	22040765	T	C	0.49178	0.0019024	0.959917	FALSE	T	C	0.2323	0.01	1.43e-119	1	T	C	0.0318	0.0154	0.03878	1	SAME	Trans-ancestry POAG	Kunkle et al., 2019
11:120198093:G:A	rs1893261	NA	120176310	120385155	11:120206163:A:T	rs3809059	11	120206163	T	A	0.495141	0.00189849	0.595229	FALSE	A	T	-0.0556	0.0092	1.442e-09	-1	A	T	0.0081	0.0143	0.5732	-1	OPPOSITE	Trans-ancestry POAG	Kunkle et al., 2019
9:22052734:T:C	rs6475604	NA	21949005	22125913	9:22040765:C:T	rs1333037	9	22040765	T	C	0.484792	0.00187873	0.959917	FALSE	T	C	0.2323	0.01	1.43e-119	1	T	C	0.0318	0.0154	0.03878	1	SAME	European POAG	Kunkle et al., 2019
7:117636111:C:G	rs10230941	NA	117482870	117711962	7:117523709:A:G	rs10233018	7	117523709	G	A	0.480853	0.00178581	0.390861	FALSE	A	G	-0.0577	0.0091	2.712e-10	-1	A	G	-0.008	0.0143	0.5767	-1	SAME	Trans-ancestry POAG	Kunkle et al., 2019
2:66537344:G:T	rs4414666	NA	66534211	66652714	2:66584645:C:G	rs1401451	2	66584645	G	C	0.348059	0.00172912	0.959364	FALSE	C	G	-0.0726	0.0096	5.318e-14	-1	C	G	0.0169	0.015	0.2587	-1	OPPOSITE	European POAG	Kunkle et al., 2019
1:88213014:T:C	rs12139208	NA	88092852	88236589	1:88213014:T:C	rs12139208	1	88213014	C	T	0.499588	0.00170236	1	FALSE	T	C	0.0541	0.0094	9.551e-09	-1	T	C	0.0167	0.0147	0.2551	-1	SAME	Trans-ancestry POAG	Kunkle et al., 2019
13:110777939:C:G	rs2218471	NA	110716808	110817171	13:110742919:A:G	rs7988988	13	110742919	G	A	0.496868	0.00169438	0.281709	FALSE	A	G	0.0508	0.0105	1.169e-06	-1	A	G	0.0141	0.0154	0.3598	-1	SAME	Trans-ancestry POAG	Kunkle et al., 2019
10:60304864:A:C	rs1649068	NA	60169970	60377014	10:60293320:A:C	rs1649078	10	60293320	C	A	0.488459	0.00167611	0.922793	FALSE	A	C	0.0834	0.009	2.8e-20	-1	A	C	0.0241	0.0152	0.1128	-1	SAME	European POAG	Kunkle et al., 2019
13:22679011:T:G	rs6490697	NA	22628988	22711688	13:22683159:A:C	rs4770245	13	22683159	C	A	0.393816	0.00166972	0.925677	FALSE	A	C	0.0842	0.0114	1.479e-13	-1	A	C	-0.0083	0.0197	0.6742	-1	OPPOSITE	European POAG	Kunkle et al., 2019
2:213760746:AT:A	rs200621439	NA	213576550	213771998	2:213723819:G:A	rs4307771	2	213723819	A	G	0.499956	0.00166777	0.775469	FALSE	A	G	0.0922	0.0145	1.784e-10	1	A	G	-0.001	0.0202	0.9601	1	OPPOSITE	Trans-ancestry POAG	Kunkle et al., 2019
22:19867771:C:T	rs1139795	NA	19753379	19908356	22:19860875:A:G	rs737854	22	19860875	G	A	0.497138	0.00164472	0.542802	FALSE	A	G	-0.0829	0.0116	9.935e-13	-1	A	G	-0.0222	0.0173	0.2016	-1	SAME	European POAG	Kunkle et al., 2019
1:54123873:G:T	rs941125	NA	54036317	54198142	1:54123873:G:T	rs941125	1	54123873	T	G	0.435959	0.00162385	1	FALSE	T	G	0.0626	0.0093	2.012e-11	1	T	G	0.0087	0.0147	0.5545	1	SAME	Trans-ancestry POAG	Kunkle et al., 2019
14:34715465:T:C	rs10151220	NA	34705610	34770605	14:34724550:T:C	rs12897414	14	34724550	C	T	0.412148	0.00162065	0.958372	FALSE	T	C	-0.0476	0.0096	7.201e-07	-1	T	C	0.0173	0.0149	0.2458	-1	OPPOSITE	European POAG	Kunkle et al., 2019
22:19870147:C:T	rs8141610	NA	19753379	19908356	22:19860875:A:G	rs737854	22	19860875	G	A	0.497181	0.00161627	0.524914	FALSE	A	G	-0.0829	0.0116	9.935e-13	-1	A	G	-0.0222	0.0173	0.2016	-1	SAME	Trans-ancestry POAG	Kunkle et al., 2019
11:128380742:C:A	rs7924522	NA	128305460	128472338	11:128380742:C:A	rs7924522	11	128380742	A	C	0.387288	0.00156212	1	FALSE	A	C	0.0769	0.0101	2.131e-14	1	A	C	-0.0016	0.0149	0.9154	1	OPPOSITE	Trans-ancestry POAG	Kunkle et al., 2019
11:115039683:G:A	rs10444329	NA	114944058	115284782	11:115039683:G:A	rs10444329	11	115039683	A	G	0.499946	0.00152993	1	FALSE	A	G	-0.0631	0.0113	2.36e-08	1	A	G	-0.0086	0.0184	0.6391	1	SAME	Trans-ancestry POAG	Kunkle et al., 2019
2:12951321:C:T	rs12623251	NA	12823121	13068075	2:12890860:T:C	rs2113818	2	12890860	C	T	0.487575	0.0015023	0.593524	FALSE	T	C	0.0677	0.0093	2.8e-13	-1	T	C	0.0184	0.0142	0.1971	-1	SAME	Trans-ancestry POAG	Kunkle et al., 2019
3:56876596:T:C	rs1500708	NA	56848774	56946695	3:56888845:G:A	rs67274221	3	56888845	A	G	0.358097	0.00148039	0.197347	FALSE	A	G	0.04	0.0095	2.42e-05	1	A	G	-0.0096	0.0144	0.5025	1	OPPOSITE	Trans-ancestry POAG	Kunkle et al., 2019
15:74221313:G:C	rs6495085	NA	74099922	74328206	15:74231857:T:C	rs9944214	15	74231857	C	T	0.499977	0.00146537	0.489563	FALSE	T	C	-0.0474	0.0099	1.579e-06	-1	T	C	0.0407	0.0156	0.009327	-1	OPPOSITE	European POAG	Kunkle et al., 2019
11:86490580:G:A	rs12786875	NA	86427342	86571591	11:86399327:T:C	rs543336	11	86399327	C	T	0.450892	0.00140289	0.0512388	FALSE	T	C	0.0604	0.0103	3.898e-09	-1	T	C	-0.0015	0.016	0.923	-1	OPPOSITE	European POAG	Kunkle et al., 2019
7:39077397:C:T	rs10248136	NA	39005522	39279758	7:39077397:C:T	rs10248136	7	39077397	T	C	0.499899	0.00138557	1	FALSE	T	C	0.0584	0.0095	7.737e-10	1	T	C	0.0057	0.0143	0.687	1	SAME	European POAG	Kunkle et al., 2019
7:39077397:C:T	rs10248136	NA	39005522	39279758	7:39077397:C:T	rs10248136	7	39077397	T	C	0.499532	0.00138467	1	FALSE	T	C	0.0584	0.0095	7.737e-10	1	T	C	0.0057	0.0143	0.687	1	SAME	Trans-ancestry POAG	Kunkle et al., 2019
7:151505698:C:T	rs62478245	NA	151399376	151508678	7:151505698:C:T	rs62478245	7	151505698	T	C	0.418947	0.00136832	1	FALSE	T	C	0.1588	0.0276	8.952e-09	1	T	C	0.0009	0.0437	0.9831	1	SAME	Trans-ancestry POAG	Kunkle et al., 2019
15:67025403:C:T	rs2439386	NA	66974553	67041110	15:67007697:T:A	rs4776315	15	67007697	A	T	0.343186	0.00136784	0.870476	FALSE	A	T	0.0592	0.0104	1.236e-08	1	A	T	0.0008	0.0161	0.9597	1	SAME	Trans-ancestry POAG	Kunkle et al., 2019
6:51899824:A:G	rs2499475	NA	51826214	52046770	6:51898738:C:G	rs2163187	6	51898738	G	C	0.435337	0.00135887	0.561388	FALSE	C	G	0.0482	0.0092	1.458e-07	-1	C	G	-0.0126	0.0147	0.391	-1	OPPOSITE	European POAG	Kunkle et al., 2019
1:92077097:G:A	rs1192415	NA	92025038	92112503	1:92068967:A:G	rs1192404	1	92068967	G	A	0.353295	0.00134289	0.73482	FALSE	A	G	-0.0717	0.0118	1.108e-09	-1	A	G	0.0806	0.0199	5.133e-05	-1	OPPOSITE	Trans-ancestry POAG	Kunkle et al., 2019
14:60976537:C:A	rs33912345	NA	60786981	61583340	14:60976537:C:A	rs33912345	14	60976537	A	C	0.498633	0.00134269	1	FALSE	A	C	-0.1606	0.0096	2.177e-62	1	A	C	0.018	0.0146	0.2165	1	OPPOSITE	European POAG	Kunkle et al., 2019
14:60976537:C:A	rs33912345	NA	60786981	61583340	14:60976537:C:A	rs33912345	14	60976537	A	C	0.50005	0.00134175	1	FALSE	A	C	-0.1606	0.0096	2.177e-62	1	A	C	0.018	0.0146	0.2165	1	OPPOSITE	Trans-ancestry POAG	Kunkle et al., 2019
3:169239578:A:G	rs4361323	NA	169195666	169354662	3:169238015:T:C	rs1997280	3	169238015	C	T	0.401891	0.00133763	0.504977	FALSE	T	C	-0.0366	0.0098	0.0001796	-1	T	C	0.0086	0.0146	0.5549	-1	OPPOSITE	Trans-ancestry POAG	Kunkle et al., 2019
7:117636111:C:G	rs10230941	NA	117482870	117711962	7:117567576:T:C	rs1548461	7	117567576	C	T	0.358387	0.0013366	0.411852	FALSE	T	C	-0.0562	0.0091	7.078e-10	-1	T	C	-0.0136	0.0142	0.3381	-1	SAME	European POAG	Kunkle et al., 2019
3:150065280:C:T	rs11710845	NA	150031304	150205573	3:150068525:C:G	rs2122476	3	150068525	G	C	0.385463	0.00130579	0.546873	FALSE	C	G	-0.0381	0.0093	4.33e-05	-1	C	G	0.0088	0.0146	0.5445	-1	OPPOSITE	Trans-ancestry POAG	Kunkle et al., 2019
5:14814883:A:G	rs31916	NA	14751399	14858494	5:14762163:C:T	rs28722100	5	14762163	T	C	0.283964	0.00124641	0.152551	FALSE	T	C	-0.0501	0.0095	1.252e-07	1	T	C	-0.024	0.0155	0.12	1	SAME	Trans-ancestry POAG	Kunkle et al., 2019
14:95956875:T:C	rs72692789	NA	95947747	96068911	14:95957694:T:G	rs11160251	14	95957694	G	T	0.499041	0.0012409	0.345939	FALSE	T	G	0.0537	0.0102	1.315e-07	-1	T	G	0.0215	0.0161	0.1834	-1	SAME	Trans-ancestry POAG	Kunkle et al., 2019
15:61947280:C:G	rs12438742	NA	61911182	62062443	15:61999944:T:C	rs2251318	15	61999944	C	T	0.339246	0.00118663	0.157685	FALSE	T	C	0.0395	0.0104	0.0001372	-1	T	C	0.006	0.0169	0.7216	-1	SAME	European POAG	Kunkle et al., 2019
15:74221298:C:T	rs1550437	NA	74095709	74329568	15:74229065:G:A	rs893817	15	74229065	A	G	0.408484	0.00118284	0.105187	FALSE	A	G	-0.0566	0.0094	2.126e-09	1	A	G	-0.0055	0.0149	0.7136	1	SAME	Trans-ancestry POAG	Kunkle et al., 2019
14:75084829:G:A	rs754458	NA	75019157	75411006	14:75084829:G:A	rs754458	14	75084829	A	G	0.41086	0.00117003	1	FALSE	A	G	0.0586	0.0093	3.083e-10	1	A	G	-0.0184	0.0142	0.1952	1	OPPOSITE	Trans-ancestry POAG	Kunkle et al., 2019
6:170454915:A:G	rs2935057	NA	170331956	170532693	6:170460912:C:T	rs2935072	6	170460912	T	C	0.446376	0.00116566	1	FALSE	T	C	0.0826	0.0127	7.97e-11	1	T	C	0.0313	0.0218	0.1507	1	SAME	Trans-ancestry POAG	Kunkle et al., 2019
9:129377855:G:C	rs1336980	NA	129250265	129415559	9:129378026:G:C	rs945686	9	129378026	C	G	0.364984	0.0011602	0.186656	FALSE	C	G	-0.1174	0.0117	9.753e-24	1	C	G	0.0081	0.0166	0.6225	1	OPPOSITE	European POAG	Kunkle et al., 2019
22:38176979:T:G	rs5750494	NA	37977713	38474852	22:38179120:T:A	rs5750495	22	38179120	A	T	0.499874	0.00115758	0.714658	FALSE	A	T	-0.0764	0.0097	3.267e-15	1	A	T	-0.0269	0.0154	0.07993	1	SAME	Trans-ancestry POAG	Kunkle et al., 2019
7:116162306:A:T	rs10257125	NA	115792128	116224835	7:116162985:T:A	rs6466581	7	116162985	A	T	0.50018	0.00115729	0.575078	FALSE	A	T	-0.0772	0.0101	2.033e-14	1	A	T	-0.005	0.0143	0.728	1	SAME	Trans-ancestry POAG	Kunkle et al., 2019
7:116159526:G:A	rs12540035	NA	115792128	116224835	7:116162985:T:A	rs6466581	7	116162985	A	T	0.50003	0.0011569	0.575078	FALSE	A	T	-0.0772	0.0101	2.033e-14	1	A	T	-0.005	0.0143	0.728	1	SAME	European POAG	Kunkle et al., 2019
9:129390800:C:T	rs3829849	NA	129250265	129423409	9:129388033:C:A	rs55770306	9	129388033	A	C	0.378746	0.00115627	0.181799	FALSE	A	C	0.1247	0.0116	8.558e-27	1	A	C	-0.0048	0.0168	0.776	1	OPPOSITE	Trans-ancestry POAG	Kunkle et al., 2019
1:36612955:C:A	rs4652902	NA	36156567	36829700	1:36591612:G:A	rs12123086	1	36591612	A	G	0.380704	0.00115021	0.410535	FALSE	A	G	-0.0624	0.0145	1.584e-05	1	A	G	0.0192	0.0223	0.3879	1	OPPOSITE	Trans-ancestry POAG	Kunkle et al., 2019
8:108273318:T:G	rs2514879	NA	108188066	108391134	8:108273318:T:G	rs2514879	8	108273318	G	T	0.351654	0.00114141	1	FALSE	T	G	-0.1266	0.0129	1.198e-22	-1	T	G	-0.0261	0.0225	0.2461	-1	SAME	Trans-ancestry POAG	Kunkle et al., 2019
11:17011176:C:A	rs4141194	NA	16930106	17418209	11:17012956:T:C	rs10832710	11	17012956	C	T	0.473294	0.00112483	0.160152	FALSE	T	C	-0.0391	0.0094	3.13e-05	-1	T	C	0.0022	0.015	0.8859	-1	OPPOSITE	Trans-ancestry POAG	Kunkle et al., 2019
11:86368106:T:C	rs10792871	NA	86209612	86413386	11:86368106:T:C	rs10792871	11	86368106	C	T	0.455013	0.00111525	1	FALSE	T	C	0.1146	0.0142	6.488e-16	-1	T	C	-0.0026	0.0255	0.9188	-1	OPPOSITE	Trans-ancestry POAG	Kunkle et al., 2019
4:54027595:A:G	rs10517281	NA	53887904	54381677	4:54023351:G:A	rs7694213	4	54023351	A	G	0.498435	0.00107177	0.419568	FALSE	A	G	0.0441	0.0095	3.361e-06	1	A	G	-0.0027	0.0155	0.8617	1	OPPOSITE	European POAG	Kunkle et al., 2019
15:61947280:C:G	rs12438742	NA	61911182	62062443	15:61958029:A:C	rs2249195	15	61958029	C	A	0.310603	0.00106873	0.900773	FALSE	A	C	0.0506	0.0092	4.105e-08	-1	A	C	0.0086	0.0143	0.548	-1	SAME	Trans-ancestry POAG	Kunkle et al., 2019
2:153364527:A:G	rs1579050	NA	152963360	153412104	2:153346845:G:T	rs3811574	2	153346845	T	G	0.50001	0.00106829	0.862424	FALSE	T	G	-0.0861	0.0102	3.245e-17	1	T	G	0.0076	0.0143	0.5919	1	OPPOSITE	Trans-ancestry POAG	Kunkle et al., 2019
12:28203245:T:A	rs7972874	NA	28124784	28740649	12:28218232:T:C	rs229988	12	28218232	C	T	0.496526	0.00105944	0.309899	FALSE	T	C	-0.0315	0.0094	0.000772	-1	T	C	-0.0003	0.0144	0.9841	-1	SAME	European POAG	Kunkle et al., 2019
4:7899379:C:T	rs6845653	NA	7759296	7973142	4:7899379:C:T	rs6845653	4	7899379	T	C	0.498408	0.00105279	1	FALSE	T	C	-0.1264	0.0096	8.662e-40	1	T	C	0.0088	0.0153	0.5678	1	OPPOSITE	European POAG	Kunkle et al., 2019
16:51601948:C:T	rs114367221	NA	51425597	51854860	16:51539762:T:A	rs12596721	16	51539762	A	T	0.491001	0.00104308	0.691319	FALSE	A	T	-0.0833	0.018	3.692e-06	1	A	T	0.0249	0.0296	0.4003	1	OPPOSITE	Trans-ancestry POAG	Kunkle et al., 2019
2:59523041:T:C	rs6713914	NA	59277406	59752036	2:59523041:T:C	rs6713914	2	59523041	C	T	0.484064	0.00103624	1	FALSE	T	C	0.0548	0.0091	1.421e-09	-1	T	C	0.0084	0.0144	0.5591	-1	SAME	Trans-ancestry POAG	Kunkle et al., 2019
12:111932800:C:T	rs7137828	NA	111335752	112928451	12:111932800:C:T	rs7137828	12	111932800	T	C	0.38106	0.00102359	1	FALSE	T	C	0.0677	0.0108	3.324e-10	1	T	C	0.0216	0.0144	0.1334	1	SAME	European POAG	Kunkle et al., 2019
2:153361700:T:C	rs55882252	NA	152886708	153441024	2:153346845:G:T	rs3811574	2	153346845	T	G	0.500007	0.00102203	0.979387	FALSE	T	G	-0.0861	0.0102	3.245e-17	1	T	G	0.0076	0.0143	0.5919	1	OPPOSITE	European POAG	Kunkle et al., 2019
12:111932800:C:T	rs7137828	NA	111335752	112928451	12:112059557:C:T	rs11065979	12	112059557	T	C	0.380956	0.00100905	0.88344	FALSE	T	C	-0.0434	0.0105	3.314e-05	1	T	C	-0.0078	0.0147	0.5954	1	SAME	Trans-ancestry POAG	Kunkle et al., 2019
1:165737704:C:G	rs2790053	NA	165466877	165799140	1:165786950:G:A	rs143863391	1	165786950	A	G	0.498683	0.00100084	0.484784	FALSE	A	G	0.2504	0.0214	1.183e-31	1	A	G	-0.0336	0.0234	0.1506	1	OPPOSITE	Trans-ancestry POAG	Kunkle et al., 2019
11:102064834:C:A	rs7120067	NA	101895958	102157900	11:102066240:G:T	rs12421242	11	102066240	T	G	0.264597	0.000997222	0.942888	FALSE	T	G	0.0537	0.0095	1.637e-08	1	T	G	0.0036	0.0151	0.8112	1	SAME	Trans-ancestry POAG	Kunkle et al., 2019
2:111638775:C:T	rs9308689	NA	111494013	111791077	2:111638775:C:T	rs9308689	2	111638775	T	C	0.345544	0.000995286	1	FALSE	T	C	-0.0629	0.0098	1.532e-10	1	T	C	0.0242	0.015	0.1064	1	OPPOSITE	Trans-ancestry POAG	Kunkle et al., 2019
10:60326910:G:A	rs1658436	NA	60169970	60377014	10:60326910:G:A	rs1658436	10	60326910	A	G	0.287516	0.000987552	1	FALSE	A	G	-0.0878	0.0091	6.034e-22	1	A	G	-0.0247	0.0142	0.08098	1	SAME	Trans-ancestry POAG	Kunkle et al., 2019
1:68837169:A:C	rs4076000	NA	68827364	69054529	1:68846246:A:G	rs3125918	1	68846246	G	A	0.359195	0.000986122	0.981998	FALSE	A	G	-0.0508	0.0097	1.645e-07	-1	A	G	-0.0297	0.0149	0.04598	-1	SAME	Trans-ancestry POAG	Kunkle et al., 2019
1:165743523:A:G	rs2790049	NA	165466877	165799140	1:165791415:T:A	rs71628393	1	165791415	A	T	0.485355	0.000985708	0.415583	FALSE	A	T	0.1899	0.0158	3.803e-33	1	A	T	-0.0245	0.0259	0.3435	1	OPPOSITE	European POAG	Kunkle et al., 2019
16:77661732:C:T	rs280875	NA	77523084	77739631	16:77661732:C:T	rs280875	16	77661732	T	C	0.499763	0.000976649	1	FALSE	T	C	-0.1035	0.0181	1.013e-08	1	T	C	0.0456	0.0254	0.0724	1	OPPOSITE	Trans-ancestry POAG	Kunkle et al., 2019
13:76254433:A:G	rs111439095	NA	76068181	76502584	13:76249275:T:C	rs9530458	13	76249275	C	T	0.500005	0.000951788	0.966806	FALSE	T	C	0.0535	0.0099	6.041e-08	-1	T	C	0.0233	0.0142	0.1005	-1	SAME	European POAG	Kunkle et al., 2019
14:76371658:G:C	rs4903352	NA	75966976	76689840	14:76210553:T:C	rs17103645	14	76210553	C	T	0.499891	0.00094654	0.199076	FALSE	T	C	0.0543	0.0104	1.651e-07	-1	T	C	-0.0138	0.0167	0.4074	-1	OPPOSITE	Trans-ancestry POAG	Kunkle et al., 2019
5:14814883:A:G	rs31916	NA	14751399	14858494	5:14762163:C:T	rs28722100	5	14762163	T	C	0.214316	0.000939911	0.152551	FALSE	T	C	-0.0501	0.0095	1.252e-07	1	T	C	-0.024	0.0155	0.12	1	SAME	European POAG	Kunkle et al., 2019
11:128387422:T:C	rs7946009	NA	128305460	128472338	11:128403208:T:C	rs6590334	11	128403208	C	T	0.228647	0.000925848	0.455975	FALSE	T	C	-0.0378	0.0096	7.817e-05	-1	T	C	0.0132	0.0144	0.3604	-1	OPPOSITE	European POAG	Kunkle et al., 2019
7:11679113:A:G	rs12699251	NA	11677088	11829280	7:11679113:A:G	rs12699251	7	11679113	G	A	0.286849	0.000917473	1	FALSE	A	G	-0.0772	0.0095	4.193e-16	-1	A	G	0.0227	0.0152	0.1366	-1	OPPOSITE	Trans-ancestry POAG	Kunkle et al., 2019
20:18010447:T:G	rs7275118	NA	17908137	18041960	20:18010447:T:G	rs7275118	20	18010447	G	T	0.285848	0.000912865	1	FALSE	T	G	0.0277	0.0095	0.003455	-1	T	G	0.0022	0.0151	0.8839	-1	SAME	European POAG	Kunkle et al., 2019
13:76258720:A:G	rs9544024	NA	76030580	76502584	13:76249275:T:C	rs9530458	13	76249275	C	T	0.49998	0.000911503	0.970854	FALSE	T	C	0.0535	0.0099	6.041e-08	-1	T	C	0.0233	0.0142	0.1005	-1	SAME	Trans-ancestry POAG	Kunkle et al., 2019
20:45534053:A:G	rs6124885	NA	45437031	45558737	20:45532122:T:C	rs6124883	20	45532122	C	T	0.272158	0.000903901	0.0588564	FALSE	T	C	-0.0363	0.0091	7.265e-05	-1	T	C	0.0202	0.0144	0.1598	-1	OPPOSITE	Trans-ancestry POAG	Kunkle et al., 2019
8:124554317:A:T	rs62521288	NA	124365166	124812731	8:124498734:T:G	rs12548263	8	124498734	G	T	0.434917	0.000885831	0.0822627	FALSE	T	G	0.0488	0.0098	6.721e-07	-1	T	G	0.0038	0.0165	0.8186	-1	SAME	Trans-ancestry POAG	Kunkle et al., 2019
4:54027595:A:G	rs10517281	NA	53887904	54381677	4:54023351:G:A	rs7694213	4	54023351	A	G	0.407469	0.000874344	0.419568	FALSE	A	G	0.0441	0.0095	3.361e-06	1	A	G	-0.0027	0.0155	0.8617	1	OPPOSITE	Trans-ancestry POAG	Kunkle et al., 2019
1:38071195:C:T	rs6687545	NA	37951754	38105212	1:38058693:T:C	rs10908360	1	38058693	C	T	0.209949	0.000868598	0.873962	FALSE	T	C	-0.0454	0.0092	7.188e-07	-1	T	C	0.0288	0.0143	0.04341	-1	OPPOSITE	European POAG	Kunkle et al., 2019
6:602983:A:C	rs17135357	NA	507364	758665	6:614375:T:G	rs1747586	6	614375	G	T	0.374806	0.000868356	0.633255	FALSE	T	G	0.0804	0.0108	1.222e-13	-1	T	G	0.0095	0.0177	0.5937	-1	SAME	European POAG	Kunkle et al., 2019
10:96023077:T:C	rs57866767	NA	95951880	97002701	10:96013705:G:A	rs9419788	10	96013705	A	G	0.311819	0.000863548	0.514985	FALSE	A	G	0.0407	0.0096	2.228e-05	1	A	G	-0.0145	0.0149	0.3318	1	OPPOSITE	Trans-ancestry POAG	Kunkle et al., 2019
3:105073472:A:C	rs6437582	NA	105001491	105314429	3:105082472:C:A	rs12497260	3	105082472	A	C	0.349312	0.000853142	0.957717	FALSE	A	C	-0.046	0.0093	7.129e-07	1	A	C	-0.0145	0.0147	0.3223	1	SAME	Trans-ancestry POAG	Kunkle et al., 2019
9:107695539:T:C	rs2472494	NA	107676758	107770735	9:107695848:G:A	rs2472493	9	107695848	A	G	0.306719	0.000852315	0.996131	FALSE	A	G	-0.1778	0.0092	1.036e-82	1	A	G	0.0039	0.0144	0.7841	1	OPPOSITE	Trans-ancestry POAG	Kunkle et al., 2019
11:65337251:A:T	rs1346	NA	64765433	65663547	11:65335268:AAAAC:A	11:65335268	11	65335268	A	AAAAC	0.361373	0.000848104	0.526538	FALSE	A	AAAAC	0.0661	0.0117	1.814e-08	1	A	AAAAC	-0.016	0.0152	0.2932	1	OPPOSITE	Trans-ancestry POAG	Kunkle et al., 2019
1:162679145:G:A	rs4542196	NA	162590219	162823107	1:162669776:G:A	rs72711557	1	162669776	A	G	0.272363	0.000824518	0.26573	FALSE	A	G	0.0665	0.013	3.429e-07	1	A	G	0.0018	0.0241	0.939	1	SAME	Trans-ancestry POAG	Kunkle et al., 2019
6:45928400:C:T	rs1555214	NA	45856968	45974403	6:45928400:C:T	rs1555214	6	45928400	T	C	0.206151	0.000821777	1	FALSE	T	C	0.056	0.0098	9.963e-09	1	T	C	-0.0099	0.0147	0.4994	1	OPPOSITE	European POAG	Kunkle et al., 2019
6:158971266:A:G	rs13194719	NA	158907243	159101908	6:158975716:C:T	rs9364973	6	158975716	T	C	0.272376	0.000814443	0.298047	FALSE	T	C	-0.055	0.0101	5.473e-08	1	T	C	0.0141	0.0157	0.3698	1	OPPOSITE	Trans-ancestry POAG	Kunkle et al., 2019
11:47469439:A:G	rs7111873	NA	46482959	48467742	11:47452730:C:CA	rs112462677	11	47452730	CA	C	0.367437	0.000811052	0.995587	FALSE	CA	C	0.0811	0.011	2.108e-13	1	CA	C	0.0109	0.0161	0.4974	1	SAME	Trans-ancestry POAG	Kunkle et al., 2019
7:134520521:C:A	rs10237321	NA	134474200	134873964	7:134505463:A:G	rs7800283	7	134505463	G	A	0.369428	0.000799799	0.0347957	FALSE	A	G	-0.0286	0.0091	0.001669	-1	A	G	0.0006	0.0142	0.9683	-1	OPPOSITE	Trans-ancestry POAG	Kunkle et al., 2019
13:73639371:G:A	rs9530143	NA	73191635	73722830	13:73579592:G:A	rs4885056	13	73579592	A	G	0.374809	0.000791101	0.286928	FALSE	A	G	0.0559	0.0107	1.959e-07	1	A	G	-0.0022	0.0161	0.8893	1	OPPOSITE	Trans-ancestry POAG	Kunkle et al., 2019
7:11704538:G:A	rs36039219	NA	11677088	11852008	7:11704538:G:A	rs36039219	7	11704538	A	G	0.25396	0.000771392	1	FALSE	A	G	0.0683	0.01	8.044e-12	1	A	G	-0.0263	0.0153	0.08511	1	OPPOSITE	European POAG	Kunkle et al., 2019
2:12890860:T:C	rs2113818	NA	12804436	13068075	2:12867403:A:G	rs17511374	2	12867403	G	A	0.261126	0.000763329	0.362488	FALSE	A	G	0.0598	0.0096	3.949e-10	-1	A	G	0.0249	0.0142	0.08008	-1	SAME	European POAG	Kunkle et al., 2019
10:10840849:A:C	rs6602453	NA	10789461	10957665	10:10857912:A:T	rs7920903	10	10857912	T	A	0.222383	0.000755684	0.466708	FALSE	A	T	0.0381	0.0098	0.0001039	-1	A	T	0.01	0.0143	0.4853	-1	SAME	Trans-ancestry POAG	Kunkle et al., 2019
2:55933014:C:T	rs2627761	NA	55510233	56110552	2:55936958:CT:C	2:55936958	2	55936958	C	CT	0.500025	0.000746114	0.973681	FALSE	CT	C	-0.1037	0.0124	7.737e-17	-1	CT	C	-0.0051	0.0186	0.7847	-1	SAME	European POAG	Kunkle et al., 2019
6:45919758:G:A	rs3777588	NA	45856968	45974403	6:45928400:C:T	rs1555214	6	45928400	T	C	0.187276	0.000743662	0.995697	FALSE	T	C	0.056	0.0098	9.963e-09	1	T	C	-0.0099	0.0147	0.4994	1	OPPOSITE	Trans-ancestry POAG	Kunkle et al., 2019
2:55933014:C:T	rs2627761	NA	55510233	56110552	2:55936958:CT:C	2:55936958	2	55936958	C	CT	0.500012	0.000739054	0.973681	FALSE	CT	C	-0.1037	0.0124	7.737e-17	-1	CT	C	-0.0051	0.0186	0.7847	-1	SAME	Trans-ancestry POAG	Kunkle et al., 2019
10:78282063:T:C	rs2637250	NA	78057746	78638957	10:78274818:T:C	rs2130800	10	78274818	C	T	0.426422	0.000732752	0.846992	FALSE	T	C	0.049	0.009	4.877e-08	-1	T	C	-0.0251	0.0141	0.0752	-1	OPPOSITE	Trans-ancestry POAG	Kunkle et al., 2019
2:28365914:G:A	rs17006576	NA	27606586	28597624	2:28303713:C:T	rs2337699	2	28303713	T	C	0.314283	0.000718372	0.316498	FALSE	T	C	0.0443	0.0092	1.412e-06	1	T	C	-0.0015	0.0145	0.916	1	OPPOSITE	Trans-ancestry POAG	Kunkle et al., 2019
7:83287607:G:A	rs1972459	NA	83029742	83330990	7:83267983:A:C	rs536299	7	83267983	C	A	0.293405	0.00067765	0.847432	FALSE	A	C	0.0591	0.0095	6.066e-10	-1	A	C	-0.0019	0.0152	0.9016	-1	OPPOSITE	European POAG	Kunkle et al., 2019
8:108277130:G:T	rs2514885	NA	108188066	108391134	8:108278616:C:A	rs10505100	8	108278616	A	C	0.208545	0.000677408	0.979924	FALSE	A	C	-0.1194	0.0129	2.426e-20	1	A	C	-0.027	0.0224	0.2283	1	SAME	European POAG	Kunkle et al., 2019
10:126278648:T:C	rs10430737	NA	126174173	126551900	10:126278648:T:C	rs10430737	10	126278648	C	T	0.352828	0.000675284	1	FALSE	T	C	0.0595	0.0094	2.319e-10	-1	T	C	-0.0286	0.0147	0.05188	-1	OPPOSITE	Trans-ancestry POAG	Kunkle et al., 2019
7:115801846:T:C	rs9649390	NA	115515534	115990960	7:115927959:G:T	rs9692117	7	115927959	T	G	0.308046	0.000665789	0.279375	FALSE	T	G	-0.0568	0.009	2.969e-10	1	T	G	-0.0182	0.0143	0.2016	1	SAME	European POAG	Kunkle et al., 2019
6:158971424:T:C	rs13197977	NA	158907243	159101908	6:158975716:C:T	rs9364973	6	158975716	T	C	0.221161	0.000664535	0.289763	FALSE	T	C	-0.055	0.0101	5.473e-08	1	T	C	0.0141	0.0157	0.3698	1	OPPOSITE	European POAG	Kunkle et al., 2019
3:25581798:C:T	rs1286770	NA	25520582	25624922	3:25581798:C:T	rs1286770	3	25581798	T	C	0.172944	0.000655107	1	FALSE	T	C	-0.0937	0.0133	1.818e-12	1	T	C	0.035	0.0217	0.1074	1	OPPOSITE	Trans-ancestry POAG	Kunkle et al., 2019
17:59239221:A:G	rs11868441	NA	58680140	59312394	17:59222069:C:T	rs983817	17	59222069	T	C	0.196931	0.000654887	0.836773	FALSE	T	C	-0.0721	0.0118	1.054e-09	1	T	C	-0.0296	0.0185	0.1093	1	SAME	Trans-ancestry POAG	Kunkle et al., 2019
11:120248493:A:G	rs58073046	NA	119936873	120388768	11:120183794:T:C	rs7108217	11	120183794	C	T	0.317477	0.000640721	0.117317	FALSE	T	C	0.0649	0.0099	5.514e-11	-1	T	C	0.0029	0.0144	0.8416	-1	SAME	European POAG	Kunkle et al., 2019
9:107695539:T:C	rs2472494	NA	107676758	107770735	9:107690709:C:G	rs1800976	9	107690709	G	C	0.228267	0.000634309	0.565616	FALSE	C	G	0.1344	0.0091	3.509e-49	-1	C	G	0.0087	0.0146	0.5524	-1	SAME	European POAG	Kunkle et al., 2019
1:38076621:C:T	rs10908363	NA	37951754	38105212	1:38078300:A:G	rs4652964	1	38078300	G	A	0.153685	0.000632733	0.979186	FALSE	A	G	-0.05	0.0092	4.983e-08	-1	A	G	0.0277	0.0143	0.05238	-1	OPPOSITE	Trans-ancestry POAG	Kunkle et al., 2019
4:89752276:G:A	rs57400569	NA	89743582	90084648	4:89752276:G:A	rs57400569	4	89752276	A	G	0.298732	0.000617191	1	FALSE	A	G	-0.0574	0.0105	4.219e-08	1	A	G	-0.0047	0.0171	0.7826	1	SAME	Trans-ancestry POAG	Kunkle et al., 2019
4:7904363:G:A	rs938604	NA	7759296	7973142	4:7905384:T:C	rs2385909	4	7905384	C	T	0.287584	0.000602211	0.991588	FALSE	T	C	0.1423	0.0095	2.405e-50	-1	T	C	0.0137	0.0148	0.3531	-1	SAME	Trans-ancestry POAG	Kunkle et al., 2019
21:27216839:T:A	rs13049669	NA	26773583	27266867	21:27245456:C:T	rs34471515	21	27245456	T	C	0.261841	0.000588515	0.903063	FALSE	T	C	-0.087	0.0155	2.155e-08	1	T	C	-0.006	0.0267	0.8207	1	SAME	Trans-ancestry POAG	Kunkle et al., 2019
1:103385373:G:A	rs993471	NA	102902818	103756881	1:103678371:T:C	rs1528206	1	103678371	C	T	0.453909	0.00054866	0.0772484	FALSE	T	C	-0.046	0.0097	1.907e-06	-1	T	C	0.0133	0.0143	0.353	-1	OPPOSITE	European POAG	Kunkle et al., 2019
17:45695242:AT:A	rs1348518145	NA	45312813	45877799	17:45612906:G:A	rs35794672	17	45612906	A	G	0.275546	0.000546127	0.996004	FALSE	A	G	-0.0652	0.0114	1.025e-08	1	A	G	0.0468	0.0153	0.002278	1	OPPOSITE	Trans-ancestry POAG	Kunkle et al., 2019
1:8495590:A:G	rs172531	NA	8352039	8980813	1:8436802:C:T	rs6678140	1	8436802	T	C	0.177687	0.000536478	0.965253	FALSE	T	C	-0.0564	0.0101	2.13e-08	1	T	C	0.0406	0.0154	0.008453	1	OPPOSITE	Trans-ancestry POAG	Kunkle et al., 2019
6:1987897:T:A	rs4512269	NA	1850512	2265344	6:1987897:T:A	rs4512269	6	1987897	A	T	0.176799	0.000516591	1	FALSE	A	T	0.1183	0.013	1.205e-19	1	A	T	0.006	0.0217	0.7816	1	SAME	European POAG	Kunkle et al., 2019
20:6507717:G:A	rs6117318	NA	6213813	6637234	20:6540290:T:G	rs1407029	20	6540290	G	T	0.265376	0.000509188	0.560454	FALSE	T	G	0.068	0.0099	6.741e-12	-1	T	G	-0.0087	0.0148	0.5565	-1	OPPOSITE	European POAG	Kunkle et al., 2019
20:6470094:G:A	rs2326788	NA	6276055	6637234	20:6540290:T:G	rs1407029	20	6540290	G	T	0.243953	0.000501377	0.493541	FALSE	T	G	0.068	0.0099	6.741e-12	-1	T	G	-0.0087	0.0148	0.5565	-1	OPPOSITE	Trans-ancestry POAG	Kunkle et al., 2019
22:29108229:A:G	rs5752776	NA	28206194	29429955	22:29115066:C:T	rs4822983	22	29115066	T	C	0.25112	0.000485046	0.995681	FALSE	T	C	-0.0764	0.0105	2.96e-13	1	T	C	0.0263	0.0156	0.09185	1	OPPOSITE	Trans-ancestry POAG	Kunkle et al., 2019
8:30454209:CA:C	rs35740987	NA	30200973	30621226	8:30512943:ATGAATT:A	rs773911122	8	30512943	A	ATGAATT	0.200523	0.000479456	0.176547	FALSE	A	ATGAATT	0.0502	0.0121	3.269e-05	1	A	ATGAATT	0.0156	0.0174	0.369	1	SAME	Trans-ancestry POAG	Kunkle et al., 2019
3:171821356:A:G	rs62283813	NA	171765125	171832535	3:171821356:A:G	rs62283813	3	171821356	G	A	0.084818	0.00046707	1	FALSE	A	G	-0.1375	0.016	1.025e-17	-1	A	G	-0.0323	0.0321	0.3142	-1	SAME	Trans-ancestry POAG	Kunkle et al., 2019
1:101078400:G:A	rs1577488	NA	100804087	101195659	1:101078400:G:A	rs1577488	1	101078400	A	G	0.18485	0.000461787	1	FALSE	A	G	-0.0794	0.0133	2.646e-09	1	A	G	0.0203	0.022	0.3551	1	OPPOSITE	European POAG	Kunkle et al., 2019
10:115546535:A:G	rs72837408	NA	115380608	115589416	10:115549191:C:G	rs9663374	10	115549191	G	C	0.139875	0.000447552	0.133142	FALSE	C	G	-0.0404	0.0095	2.067e-05	-1	C	G	-0.0104	0.0154	0.5	-1	SAME	Trans-ancestry POAG	Kunkle et al., 2019
6:36586070:G:A	rs12208086	NA	36345180	36611868	6:36414308:A:T	rs6457918	6	36414308	T	A	0.17546	0.000428668	0.409381	FALSE	A	T	0.0345	0.0097	0.0003755	-1	A	T	-0.0214	0.0155	0.1682	-1	OPPOSITE	European POAG	Kunkle et al., 2019
17:44087500:A:G	rs41543317	NA	43463493	44904147	17:44087500:A:G	rs41543317	17	44087500	G	A	0.491772	0.000427463	1	FALSE	A	G	-0.0619	0.0103	1.905e-09	-1	A	G	-0.0136	0.0155	0.3814	-1	SAME	European POAG	Kunkle et al., 2019
12:107219308:A:G	rs1037013	NA	106931703	107547288	12:107213601:A:T	rs1216002	12	107213601	T	A	0.214495	0.000419874	0.561144	FALSE	A	T	0.0369	0.0097	0.0001362	-1	A	T	-0.0352	0.0145	0.01555	-1	OPPOSITE	Trans-ancestry POAG	Kunkle et al., 2019
16:65055840:G:T	rs257336	NA	64880609	65286870	16:64950482:C:A	rs8048383	16	64950482	A	C	0.214113	0.000414421	0.215397	FALSE	A	C	0.0321	0.0094	0.000605	1	A	C	0.0144	0.0143	0.3173	1	SAME	European POAG	Kunkle et al., 2019
12:28203245:T:A	rs7972874	NA	28124784	28740649	12:28218232:T:C	rs229988	12	28218232	C	T	0.195111	0.000411407	0.309899	FALSE	T	C	-0.0315	0.0094	0.000772	-1	T	C	-0.0003	0.0144	0.9841	-1	SAME	Trans-ancestry POAG	Kunkle et al., 2019
17:58830188:A:G	rs11658334	NA	58655882	59312145	17:58854993:G:A	rs9903592	17	58854993	A	G	0.109493	0.000399827	0.926017	FALSE	A	G	0.0688	0.0158	1.295e-05	1	A	G	0.0072	0.0234	0.7584	1	SAME	European POAG	Kunkle et al., 2019
9:113312231:G:C	rs61751937	NA	113099642	113319210	9:113189065:T:G	rs2254179	9	113189065	G	T	0.164584	0.000392743	0.0155617	FALSE	T	G	-0.0432	0.0094	4.043e-06	-1	T	G	-0.0195	0.0148	0.1887	-1	SAME	Trans-ancestry POAG	Kunkle et al., 2019
1:103379918:G:A	rs3753841	NA	102902818	103756881	1:103214274:G:A	rs6577334	1	103214274	A	G	0.314703	0.000378961	0.757928	FALSE	A	G	0.0583	0.0093	4.234e-10	1	A	G	-0.0113	0.0149	0.4492	1	OPPOSITE	Trans-ancestry POAG	Kunkle et al., 2019
7:82949529:T:G	rs7805468	NA	82775913	83101782	7:82958769:T:C	rs6959377	7	82958769	C	T	0.180799	0.00036414	0.963727	FALSE	T	C	-0.0598	0.0091	5.033e-11	-1	T	C	0.0042	0.0145	0.7693	-1	OPPOSITE	Trans-ancestry POAG	Kunkle et al., 2019
11:86355565:C:T	rs581796	NA	86209612	86413386	11:86361508:G:A	rs686768	11	86361508	A	G	0.148317	0.000363719	0.947784	FALSE	A	G	-0.1114	0.0142	4.913e-15	1	A	G	0.007	0.0262	0.7888	1	OPPOSITE	European POAG	Kunkle et al., 2019
7:103624813:A:G	rs12667675	NA	103581626	103883443	7:103621872:A:G	rs11984351	7	103621872	G	A	0.171243	0.000353084	0.108041	FALSE	A	G	-0.0374	0.0091	4.162e-05	-1	A	G	-0.0012	0.0142	0.935	-1	SAME	Trans-ancestry POAG	Kunkle et al., 2019
14:53386836:G:C	rs8009633	NA	53095602	53472513	14:53386836:G:C	rs8009633	14	53386836	C	G	0.126553	0.000346752	1	FALSE	C	G	-0.0612	0.011	2.45e-08	1	C	G	-0.0029	0.0176	0.867	1	SAME	European POAG	Kunkle et al., 2019
22:18377329:G:A	rs8140413	NA	18313591	18481316	22:18281729:G:A	rs9605408	22	18281729	A	G	0.123267	0.000336234	0.0113557	FALSE	A	G	-0.0284	0.0102	0.005422	1	A	G	-0.0087	0.0164	0.5964	1	SAME	European POAG	Kunkle et al., 2019
3:85172364:G:C	rs13101042	NA	84776802	85683600	3:85071278:G:A	rs9876378	3	85071278	A	G	0.214703	0.000330926	0.340283	FALSE	A	G	-0.0706	0.0103	9.095e-12	1	A	G	-0.0083	0.0146	0.5722	1	SAME	Trans-ancestry POAG	Kunkle et al., 2019
15:92331707:A:G	rs8038628	NA	92326758	92448860	15:92331707:A:G	rs8038628	15	92331707	G	A	0.084829	0.000325674	1	FALSE	A	G	-0.0669	0.0121	2.907e-08	-1	A	G	0.0047	0.0213	0.8242	-1	OPPOSITE	Trans-ancestry POAG	Kunkle et al., 2019
1:219215137:G:A	rs6667536	NA	219097514	219563344	1:219127046:G:A	rs589217	1	219127046	A	G	0.149361	0.000307667	0.871191	FALSE	A	G	0.12	0.0212	1.546e-08	1	A	G	-0.0005	0.0283	0.9846	1	OPPOSITE	Trans-ancestry POAG	Kunkle et al., 2019
3:171820211:T:G	rs62283809	NA	171765125	171832535	3:171820211:T:G	rs62283809	3	171820211	G	T	0.0558144	0.000305782	1	FALSE	T	G	-0.1332	0.0157	2.605e-17	-1	T	G	-0.0378	0.0315	0.2306	-1	SAME	European POAG	Kunkle et al., 2019
2:71651939:T:A	rs12613800	NA	71305267	71703454	2:71651939:T:A	rs12613800	2	71651939	A	T	0.157111	0.000261387	1	FALSE	A	T	0.0587	0.0093	2.549e-10	1	A	T	0.0273	0.0143	0.05673	1	SAME	Trans-ancestry POAG	Kunkle et al., 2019
6:51414922:C:T	rs72904286	NA	50950990	51698892	6:51438609:C:T	rs2439035	6	51438609	T	C	0.182353	0.000253434	0.924539	FALSE	T	C	-0.1587	0.015	2.778e-26	1	T	C	-0.0494	0.0226	0.02882	1	SAME	Trans-ancestry POAG	Kunkle et al., 2019
3:85144350:G:A	rs9819278	NA	84776802	85683600	3:85073170:T:C	rs6791363	3	85073170	C	T	0.161503	0.000249502	0.339876	FALSE	T	C	0.07	0.0103	1.304e-11	-1	T	C	0.0087	0.0146	0.5498	-1	SAME	European POAG	Kunkle et al., 2019
9:129920463:G:A	rs2027312	NA	129614851	130223754	9:129952141:G:A	rs1890546	9	129952141	A	G	0.0983369	0.000243282	0.828449	FALSE	A	G	-0.0531	0.0095	2.149e-08	1	A	G	0.0147	0.0143	0.3063	1	OPPOSITE	European POAG	Kunkle et al., 2019
20:38074218:T:C	rs6101546	NA	37746454	38423274	20:37958258:G:T	rs6129261	20	37958258	T	G	0.131229	0.00023821	0.748689	FALSE	T	G	-0.0517	0.0091	1.495e-08	1	T	G	0.0138	0.0146	0.3435	1	OPPOSITE	Trans-ancestry POAG	Kunkle et al., 2019
1:171858552:A:T	rs74315329 (proxy)	1_171605478_G_A (Proxy from GTEx v7)	171225981	172180179	1:171822625:A:T	rs55702618	1	171822625	T	A	0.194901	0.000226005	0.000836824	FALSE	A	T	-0.1114	0.0194	9.297e-09	-1	A	T	0.0538	0.0309	0.0816	-1	OPPOSITE	Trans-ancestry POAG	Kunkle et al., 2019
10:10840849:A:C	rs6602453	NA	10789461	10957665	10:10857912:A:T	rs7920903	10	10857912	T	A	0.064266	0.000219289	0.466708	FALSE	A	T	0.0381	0.0098	0.0001039	-1	A	T	0.01	0.0143	0.4853	-1	SAME	European POAG	Kunkle et al., 2019
10:94929116:C:T	rs10882167	NA	94849871	95092324	10:94954567:A:C	rs4918902	10	94954567	C	A	0.0914398	0.000214487	0.786773	FALSE	A	C	0.0598	0.0096	4.641e-10	-1	A	C	-0.0021	0.0142	0.8801	-1	OPPOSITE	Trans-ancestry POAG	Kunkle et al., 2019
16:65067443:C:T	rs12447201	NA	64880609	65286870	16:64950482:C:A	rs8048383	16	64950482	A	C	0.107312	0.000207414	0.219744	FALSE	A	C	0.0321	0.0094	0.000605	1	A	C	0.0144	0.0143	0.3173	1	SAME	Trans-ancestry POAG	Kunkle et al., 2019
8:6377141:C:G	rs2515437	NA	6239164	6393413	8:6354159:T:C	rs2922806	8	6354159	C	T	0.106861	0.000198234	0.0967229	FALSE	T	C	0.0386	0.0106	0.0002762	-1	T	C	0.0408	0.017	0.01624	-1	SAME	Trans-ancestry POAG	Kunkle et al., 2019
17:44025888:C:A	rs242559/rs114919114	NA	43399058	44908263	17:44025888:C:A	rs242559	17	44025888	A	C	0.192779	0.000182405	1	FALSE	A	C	-0.0732	0.0119	8.795e-10	1	A	C	0.0221	0.0178	0.215	1	OPPOSITE	Trans-ancestry POAG	Kunkle et al., 2019
6:51460154:T:G	rs2579989	NA	50950990	51698892	6:51460154:T:G	rs2579989	6	51460154	G	T	0.124371	0.000182386	1	FALSE	T	G	-0.1593	0.0152	1.544e-25	-1	T	G	-0.0517	0.0226	0.02235	-1	SAME	European POAG	Kunkle et al., 2019
6:122645298:A:C	rs7760346	NA	122379099	123005705	6:122885419:T:C	rs9388096	6	122885419	C	T	0.097422	0.000182196	0.758393	FALSE	T	C	-0.0477	0.0096	7.136e-07	-1	T	C	-0.0178	0.0151	0.2385	-1	SAME	Trans-ancestry POAG	Kunkle et al., 2019
1:101095202:A:G	rs12566440	NA	100798137	101195659	1:101106981:A:G	rs9434126	1	101106981	G	A	0.0719409	0.000178632	0.635802	FALSE	A	G	0.0582	0.0089	7.317e-11	-1	A	G	-0.0317	0.0142	0.02567	-1	OPPOSITE	Trans-ancestry POAG	Kunkle et al., 2019
7:82955177:C:G	rs4577906	NA	82775913	83093742	7:82955177:C:G	rs4577906	7	82955177	G	C	0.0852675	0.000175039	1	FALSE	C	G	-0.0579	0.0091	2.327e-10	-1	C	G	0.0021	0.0145	0.8872	-1	OPPOSITE	European POAG	Kunkle et al., 2019
6:36570366:T:C	rs7344	NA	36345180	36611868	6:36570366:T:C	rs7344	6	36570366	C	T	0.0717068	0.000174567	1	FALSE	T	C	-0.0858	0.0102	5.721e-17	-1	T	C	0.0267	0.0173	0.1217	-1	OPPOSITE	Trans-ancestry POAG	Kunkle et al., 2019
9:136131188:C:T	rs8176749	NA	135442074	136388148	9:136098920:G:A	rs4486266	9	136098920	A	G	0.12233	0.000162153	0.367709	FALSE	A	G	-0.0332	0.0116	0.004257	1	A	G	0.014	0.0201	0.4869	1	OPPOSITE	Trans-ancestry POAG	Kunkle et al., 2019
15:57473075:T:C	rs2431023 (proxy)	15_57553832_A_T (Proxy from GTEx v7)	56787114	57643367	15:57332971:A:G	rs1820995	15	57332971	G	A	0.161532	0.000160373	0.920673	FALSE	A	G	-0.0581	0.009	1.129e-10	-1	A	G	-0.0021	0.0144	0.8863	-1	SAME	Trans-ancestry POAG	Kunkle et al., 2019
6:29806901:C:G	rs407238/rs115586772	NA	28808992	30803526	6:29896680:A:G	rs2517754	6	29896680	G	A	0.380577	0.000140594	0.488784	FALSE	A	G	-0.0649	0.0102	2.329e-10	-1	A	G	-0.0024	0.0164	0.884	-1	SAME	Trans-ancestry POAG	Kunkle et al., 2019
1:36579215:G:A	rs4653159	NA	35926150	36855033	1:36242028:G:A	rs10908410	1	36242028	A	G	0.0487587	0.000136599	0.258079	FALSE	A	G	-0.0378	0.0126	0.002795	1	A	G	-0.009	0.0207	0.6649	1	SAME	European POAG	Kunkle et al., 2019
14:53960089:A:G	rs12433661	NA	53739097	54018406	14:53923245:G:A	rs7146329	14	53923245	A	G	0.0509543	0.000122472	0.276252	FALSE	A	G	-0.0209	0.0096	0.02894	1	A	G	0.0008	0.0147	0.9583	1	OPPOSITE	Trans-ancestry POAG	Kunkle et al., 2019
15:57538801:T:A	rs935328	NA	56788798	57643367	15:57543239:G:A	rs2593234	15	57543239	A	G	0.0575428	0.000112864	0.9603	FALSE	A	G	-0.0662	0.0106	4.581e-10	1	A	G	-0.0167	0.0165	0.3111	1	SAME	European POAG	Kunkle et al., 2019
7:35961137:C:T	rs6957752	NA	35584178	36067466	7:35961137:C:T	rs6957752	7	35961137	T	C	0.0515871	0.000111786	1	FALSE	T	C	0.0526	0.0095	3.629e-08	1	T	C	-0.0015	0.0152	0.9224	1	OPPOSITE	Trans-ancestry POAG	Kunkle et al., 2019
17:2201944:A:G	rs216197	NA	1931965	2296014	17:2165340:A:G	rs7213232	17	2165340	G	A	0.0351622	9.35414e-05	0.995673	FALSE	A	G	0.0589	0.0096	8.117e-10	-1	A	G	0.0051	0.0148	0.7296	-1	SAME	Trans-ancestry POAG	Kunkle et al., 2019
1:171605478:G:A	rs74315329	1_171858552_A_T (Proxy from GTEx v7)	171225981	172180179	1:171863917:T:C	rs4916237	1	171863917	C	T	0.0947204	8.54955e-05	0.0038509	FALSE	T	C	0.0317	0.0091	0.000477	-1	T	C	-0.0042	0.0144	0.7706	-1	OPPOSITE	European POAG	Kunkle et al., 2019
6:30086422:G:C	rs9261431	NA	29545494	30735105	6:29745439:A:G	rs2394685	6	29745439	G	A	0.214812	7.99933e-05	0.264807	FALSE	A	G	-0.0621	0.0092	1.57e-11	-1	A	G	-0.0183	0.0152	0.2294	-1	SAME	European POAG	Kunkle et al., 2019
12:84023388:T:C	rs2667477	NA	83587921	84997620	12:84023388:T:C	rs2667477	12	84023388	C	T	0.0562637	6.82017e-05	1	FALSE	T	C	-0.0736	0.0095	1.041e-14	-1	T	C	-0.0077	0.0143	0.5875	-1	SAME	European POAG	Kunkle et al., 2019
12:83948055:T:C	rs324788	NA	83587921	84947046	12:83948055:T:C	rs324788	12	83948055	C	T	0.0490463	5.72569e-05	1	FALSE	T	C	-0.0741	0.0095	8.239e-15	-1	T	C	-0.0125	0.0149	0.4006	-1	SAME	Trans-ancestry POAG	Kunkle et al., 2019
16:59995651:G:T	rs190157577 (proxy)	16_59995564_A_G (Proxy from GTEx v7)	59003229	60081785	16:59217905:A:G	rs62057974	16	59217905	G	A	0.00680155	8.4937e-06	0.00215039	FALSE	A	G	-0.0614	0.0188	0.001064	-1	A	G	-0.0442	0.0307	0.1491	-1	SAME	Trans-ancestry POAG	Kunkle et al., 2019

## Sheet: Supplementary Data 8
POAG lead GWAS variant aligned to 1KG	RS ID POAG GWAS variant	LD proxy variant	Locus start	Locus end	Variant ID of top eCAVIAR result	RS ID top eCAVIAR results	Chr	Pos, b37	A1	A2	Prob in pCausalSet	CLPP	R2 relative to lead GWAS variant	Significant at CLPP >0.01	Effect allele POAG	Other allele POAG	Effect POAG	StdErr POAG	Pvalue POAG	POAG effect allele match A1 in 1KG	Effect allele AD	Non Effect allele AD	Effect AD	StdErr AD	Pvalue AD	AD effect allele match A1 in 1KG	Relative direction of effect, POAG/AD	POAG GWAS ancestry	AD GWAS
14:34715465:T:C	rs10151220	NA	34705610	34770605	14:34715466:G:A	rs10139172	14	34715466	A	G	0.503287	0.140158	0.995806	TRUE	A	G	-0.0536	0.0099	6.113e-08	1	G	A	-0.00511865	0.00222008	0.021132	-1	SAME	European POAG	Jansen et al., 2019
2:45878760:G:T	rs687914	NA	45863787	45950332	2:45864578:A:G	rs938662	2	45864578	G	A	0.693841	0.112689	0.692383	TRUE	A	G	-0.063	0.0112	1.782e-08	-1	A	G	-0.00546519	0.00243737	0.0249451	-1	SAME	Trans-ancestry POAG	Jansen et al., 2019
2:71651939:T:A	rs12613800	NA	71305267	71703454	2:71651939:T:A	rs12613800	2	71651939	A	T	0.445134	0.112362	1	TRUE	A	T	0.0587	0.0093	2.549e-10	1	A	T	0.0080657	0.00217047	0.000202318	1	SAME	Trans-ancestry POAG	Jansen et al., 2019
14:34715465:T:C	rs10151220	NA	34705610	34770605	14:34715465:T:C	rs10151220	14	34715465	C	T	0.383941	0.106922	1	TRUE	T	C	0.0533	0.0099	7.536e-08	-1	T	C	-0.00514077	0.00222013	0.0205839	-1	OPPOSITE	European POAG	Jansen et al., 2019
2:71651939:T:A	rs12613800	NA	71305267	71703454	2:71652473:A:G	rs12713749	2	71652473	G	A	0.301859	0.0761966	1	TRUE	A	G	-0.0586	0.0093	2.701e-10	-1	G	A	0.00795003	0.00217057	0.000249622	1	OPPOSITE	Trans-ancestry POAG	Jansen et al., 2019
7:117636111:C:G	rs10230941	NA	117482870	117711962	7:117523709:A:G	rs10233018	7	117523709	G	A	0.936098	0.0588299	0.390861	TRUE	A	G	-0.0577	0.0091	2.712e-10	-1	A	G	-0.00427858	0.00216116	0.0477299	-1	SAME	Trans-ancestry POAG	Jansen et al., 2019
2:45878760:G:T	rs687914	NA	45863787	45950332	2:45880122:G:C	rs650508	2	45880122	C	G	0.305839	0.0496722	0.762051	TRUE	C	G	-0.0666	0.011	1.582e-09	1	C	G	-0.00535577	0.00238116	0.0244978	1	SAME	Trans-ancestry POAG	Jansen et al., 2019
2:71651939:T:A	rs12613800	NA	71305267	71703454	2:71661422:C:T	rs4643565	2	71661422	T	C	0.166869	0.0421217	0.995797	TRUE	T	C	0.0584	0.0093	3.479e-10	1	T	C	0.00781749	0.00217249	0.000320183	1	SAME	Trans-ancestry POAG	Jansen et al., 2019
7:117636111:C:G	rs10230941	NA	117482870	117711962	7:117523709:A:G	rs10233018	7	117523709	G	A	0.837305	0.0349024	0.390861	TRUE	A	G	-0.0577	0.0091	2.712e-10	-1	A	G	-0.00427858	0.00216116	0.0477299	-1	SAME	European POAG	Jansen et al., 2019
14:34715465:T:C	rs10151220	NA	34705610	34770605	14:34724550:T:C	rs12897414	14	34724550	C	T	0.057042	0.0158853	0.958372	TRUE	T	C	-0.0476	0.0096	7.201e-07	-1	C	T	-0.00505991	0.00226298	0.0253548	1	SAME	European POAG	Jansen et al., 2019
14:34715465:T:C	rs10151220	NA	34705610	34770605	14:34721134:T:G	rs12879626	14	34721134	G	T	0.0466571	0.0129933	0.971228	TRUE	T	G	0.0512	0.0097	1.337e-07	-1	T	G	-0.00457387	0.00220449	0.0380056	-1	OPPOSITE	European POAG	Jansen et al., 2019
9:22052734:T:C	rs6475604	NA	21949005	22125913	9:22026594:G:A	rs613312	9	22026594	A	G	0.376718	0.0102327	0.902126	TRUE	A	G	-0.2191	0.01	2.34e-106	1	A	G	-0.00423295	0.00221982	0.0565346	1	SAME	European POAG	Jansen et al., 2019
6:170454915:A:G	rs2935057	NA	170331956	170532693	6:170460912:C:T	rs2935072	6	170460912	T	C	0.714264	0.0101154	1	TRUE	T	C	0.0826	0.0127	7.97e-11	1	T	C	0.00662021	0.00319793	0.0384378	1	SAME	Trans-ancestry POAG	Jansen et al., 2019
9:22051670:G:C	rs944801	NA	21949005	22125913	9:22040765:C:T	rs1333037	9	22040765	T	C	0.697483	0.00741712	0.959917	FALSE	T	C	0.2323	0.01	1.43e-119	1	C	T	-0.00400721	0.0022106	0.069874	-1	OPPOSITE	Trans-ancestry POAG	Jansen et al., 2019
14:95956875:T:C	rs72692789	NA	95947747	96068911	14:95957694:T:G	rs11160251	14	95957694	G	T	0.887071	0.00662049	0.345939	FALSE	T	G	0.0537	0.0102	1.315e-07	-1	G	T	-0.00607594	0.00235643	0.00992444	1	OPPOSITE	Trans-ancestry POAG	Jansen et al., 2019
3:188066953:T:G	rs6787621	NA	188011407	188069360	3:188066953:T:G	rs6787621	3	188066953	G	T	0.660599	0.00655194	1	FALSE	T	G	-0.0766	0.0101	2.947e-14	-1	T	G	-0.00344015	0.00238843	0.149771	-1	SAME	Trans-ancestry POAG	Jansen et al., 2019
6:136474794:T:A	rs9494457	NA	136370658	136505036	6:136501828:G:A	rs487278	6	136501828	A	G	0.682653	0.00536072	0.453802	FALSE	A	G	0.0716	0.0096	6.688e-14	1	G	A	0.00314532	0.00221908	0.156367	-1	SAME	European POAG	Jansen et al., 2019
1:101078400:G:A	rs1577488	NA	100804087	101195659	1:101078400:G:A	rs1577488	1	101078400	A	G	0.285094	0.00496189	1	FALSE	A	G	-0.0794	0.0133	2.646e-09	1	G	A	-0.00666309	0.00301045	0.0268757	-1	SAME	European POAG	Jansen et al., 2019
1:68837169:A:C	rs4076000	NA	68827364	69054529	1:68837170:G:C	rs4265468	1	68837170	C	G	0.434948	0.00462917	1	FALSE	C	G	-0.0549	0.0098	2.469e-08	1	G	C	0.00448256	0.00218469	0.0401887	-1	OPPOSITE	Trans-ancestry POAG	Jansen et al., 2019
6:136462744:T:G	rs4612174	NA	136370658	136505036	6:136481391:A:G	rs509342	6	136481391	G	A	0.617275	0.00396758	0.469211	FALSE	A	G	-0.0798	0.0102	4.135e-15	-1	A	G	0.00281957	0.00233498	0.227227	-1	OPPOSITE	Trans-ancestry POAG	Jansen et al., 2019
13:110777939:C:G	rs2218471	NA	110716808	110817171	13:110742919:A:G	rs7988988	13	110742919	G	A	0.57821	0.00348841	0.281709	FALSE	A	G	0.0508	0.0105	1.169e-06	-1	A	G	0.00386329	0.0023301	0.0973187	-1	SAME	Trans-ancestry POAG	Jansen et al., 2019
7:11704538:G:A	rs36039219	NA	11677088	11852008	7:11696429:C:T	rs10499418	7	11696429	T	C	0.266327	0.00335401	0.275152	FALSE	T	C	0.034	0.0093	0.0002421	1	C	T	0.00489029	0.00217516	0.0245602	-1	SAME	European POAG	Jansen et al., 2019
2:111638775:C:T	rs9308689	NA	111494013	111791077	2:111595937:G:A	rs2612696	2	111595937	A	G	0.459486	0.00306699	0.430668	FALSE	A	G	0.045	0.0098	4.473e-06	1	G	A	-0.00498974	0.00235493	0.0341032	-1	OPPOSITE	Trans-ancestry POAG	Jansen et al., 2019
17:44025888:C:A	rs242559/rs114919114	NA	43399058	44908263	17:44026548:T:C	rs242561	17	44026548	C	T	0.518099	0.00288824	0.944512	FALSE	T	C	0.0729	0.0124	4.824e-09	-1	T	C	-0.00534266	0.00266623	0.0450887	-1	OPPOSITE	Trans-ancestry POAG	Jansen et al., 2019
11:120198093:G:A	rs1893261	NA	120176310	120385155	11:120316907:AAAT:A	11:120316907	11	120316907	A	AAAT	0.452338	0.00236801	0.183285	FALSE	A	AAAT	-0.109	0.0157	3.858e-12	1	I	D	0.0256665	0.0157188	0.1025	-1	SAME	Trans-ancestry POAG	Jansen et al., 2019
20:45534053:A:G	rs6124885	NA	45437031	45558737	20:45508113:T:TTTTTG	rs11472832	20	45508113	TTTTTG	T	0.61735	0.0023094	0.647657	FALSE	T	TTTTTG	-0.0735	0.0163	6.541e-06	-1	D	I	0.0328358	0.0243331	0.1772	-1	OPPOSITE	Trans-ancestry POAG	Jansen et al., 2019
6:1548369:A:G	rs2745572	NA	1518773	1580213	6:1548369:A:G	rs2745572	6	1548369	G	A	0.572511	0.00181951	1	FALSE	A	G	0.1077	0.0097	1.292e-28	-1	G	A	0.0027604	0.00226101	0.222135	1	SAME	Trans-ancestry POAG	Jansen et al., 2019
12:107219308:A:G	rs1037013	NA	106931703	107547288	12:107284460:A:G	rs4964494	12	107284460	G	A	0.205863	0.00178626	0.8772	FALSE	A	G	0.0536	0.0094	1.104e-08	-1	G	A	0.00754849	0.00220445	0.000616618	1	SAME	Trans-ancestry POAG	Jansen et al., 2019
1:92077097:G:A	rs1192415	NA	92025038	92112503	1:92068967:A:G	rs1192404	1	92068967	G	A	0.332366	0.00174041	0.73482	FALSE	A	G	-0.0717	0.0118	1.108e-09	-1	G	A	-0.00353718	0.0029264	0.226772	1	SAME	Trans-ancestry POAG	Jansen et al., 2019
6:1548369:A:G	rs2745572	NA	1518773	1580213	6:1548369:A:G	rs2745572	6	1548369	G	A	0.576066	0.00173871	1	FALSE	A	G	0.1077	0.0097	1.292e-28	-1	G	A	0.0027604	0.00226101	0.222135	1	SAME	European POAG	Jansen et al., 2019
7:80845529:G:GA	rs59101260	NA	80834923	80909100	7:80864520:T:A	rs327747	7	80864520	A	T	0.504	0.00150247	0.588486	FALSE	A	T	0.0577	0.01	8.099e-09	1	T	A	0.00121937	0.00529365	0.817823	-1	SAME	Trans-ancestry POAG	Jansen et al., 2019
21:40406630:G:A	rs13050568	NA	40382795	40452229	21:40404143:C:A	rs6517503	21	40404143	A	C	0.490459	0.00145212	0.834799	FALSE	A	C	-0.0619	0.0104	2.434e-09	1	C	A	0.00231496	0.00248831	0.352197	-1	OPPOSITE	Trans-ancestry POAG	Jansen et al., 2019
1:36612955:C:A	rs4652902	NA	36156567	36829700	1:36591612:G:A	rs12123086	1	36591612	A	G	0.355116	0.00141027	0.410535	FALSE	A	G	-0.0624	0.0145	1.584e-05	1	A	G	-0.00546591	0.00334395	0.10214	1	SAME	Trans-ancestry POAG	Jansen et al., 2019
11:128380742:C:A	rs7924522	NA	128305460	128472338	11:128380742:C:A	rs7924522	11	128380742	A	C	0.417224	0.00136611	1	FALSE	A	C	0.0769	0.0101	2.131e-14	1	C	A	-0.00277507	0.00226748	0.221005	-1	OPPOSITE	Trans-ancestry POAG	Jansen et al., 2019
1:113242122:T:G	rs1106287	NA	113022419	113254267	1:113205526:CTGT:C	1:113205526	1	113205526	C	CTGT	0.486097	0.00133887	0.747947	FALSE	CTGT	C	0.0437	0.0114	0.0001293	-1	I	D	-0.000187097	0.0114827	0.987	-1	OPPOSITE	Trans-ancestry POAG	Jansen et al., 2019
7:116159526:G:A	rs12540035	NA	115792128	116224835	7:116162985:T:A	rs6466581	7	116162985	A	T	0.55814	0.00127153	0.575078	FALSE	A	T	-0.0772	0.0101	2.033e-14	1	T	A	0.00256083	0.00219511	0.24337	-1	OPPOSITE	European POAG	Jansen et al., 2019
2:12951321:C:T	rs12623251	NA	12823121	13068075	2:12890860:T:C	rs2113818	2	12890860	C	T	0.480304	0.00126455	0.593524	FALSE	T	C	0.0677	0.0093	2.8e-13	-1	C	T	-0.0010198	0.00218642	0.640911	1	OPPOSITE	Trans-ancestry POAG	Jansen et al., 2019
7:116162306:A:T	rs10257125	NA	115792128	116224835	7:116162985:T:A	rs6466581	7	116162985	A	T	0.553785	0.00126433	0.575078	FALSE	A	T	-0.0772	0.0101	2.033e-14	1	T	A	0.00256083	0.00219511	0.24337	-1	OPPOSITE	Trans-ancestry POAG	Jansen et al., 2019
22:29613441:G:T	rs7284245	NA	29540920	29620325	22:29616265:A:G	rs132384	22	29616265	G	A	0.58838	0.00125822	0.1561	FALSE	A	G	0.0642	0.0107	1.882e-09	-1	A	G	0.00608517	0.00588457	0.301094	-1	SAME	European POAG	Jansen et al., 2019
2:55933014:C:T	rs2627761	NA	55510233	56110552	2:55936958:CT:C	2:55936958	2	55936958	C	CT	0.716733	0.00121072	0.973681	FALSE	CT	C	-0.1037	0.0124	7.737e-17	-1	I	D	-0.0347315	0.0148026	0.01896	-1	SAME	European POAG	Jansen et al., 2019
3:150065280:C:T	rs11710845	NA	150031304	150205573	3:150068525:C:G	rs2122476	3	150068525	G	C	0.395264	0.00120694	0.546873	FALSE	C	G	-0.0381	0.0093	4.33e-05	-1	C	G	0.00196882	0.00222697	0.376653	-1	OPPOSITE	Trans-ancestry POAG	Jansen et al., 2019
4:184779187:G:T	rs6552711	NA	184763996	184841089	4:184794890:A:G	rs11735185	4	184794890	G	A	0.47807	0.00120296	0.33381	FALSE	A	G	-0.0532	0.0093	1.132e-08	-1	A	G	-0.00103032	0.00218806	0.637725	-1	SAME	Trans-ancestry POAG	Jansen et al., 2019
11:17011176:C:A	rs4141194	NA	16930106	17418209	11:17012956:T:C	rs10832710	11	17012956	C	T	0.576148	0.00118822	0.160152	FALSE	T	C	-0.0391	0.0094	3.13e-05	-1	T	C	-0.00340133	0.002258	0.131977	-1	SAME	Trans-ancestry POAG	Jansen et al., 2019
15:74221313:G:C	rs6495085	NA	74099922	74328206	15:74231857:T:C	rs9944214	15	74231857	C	T	0.500515	0.00118783	0.489563	FALSE	T	C	-0.0474	0.0099	1.579e-06	-1	T	C	0.00076148	0.00234196	0.74507	-1	OPPOSITE	European POAG	Jansen et al., 2019
6:36570366:T:C	rs7344	NA	36345180	36611868	6:36570366:T:C	rs7344	6	36570366	T	C	0.121282	0.00029	1	FALSE	T	C	-0.0858	0.0102	5.721e-17	1	C	T	-0.00337496	0.00251004	0.189395	-1	OPPOSITE	Trans-ancestry POAG	Jansen et al., 2019
7:151505698:C:T	rs62478245	NA	151399376	151508678	7:151505698:C:T	rs62478245	7	151505698	T	C	0.359836	0.00115187	1	FALSE	T	C	0.1588	0.0276	8.952e-09	1	T	C	0.00524101	0.00616428	0.395201	1	SAME	Trans-ancestry POAG	Jansen et al., 2019
22:38176979:T:G	rs5750494	NA	37977713	38474852	22:38179120:T:A	rs5750495	22	38179120	A	T	0.610812	0.00113058	0.714658	FALSE	A	T	-0.0764	0.0097	3.267e-15	1	T	A	0.00321553	0.0022959	0.161348	-1	OPPOSITE	Trans-ancestry POAG	Jansen et al., 2019
2:55933014:C:T	rs2627761	NA	55510233	56110552	2:55936958:CT:C	2:55936958	2	55936958	C	CT	0.717727	0.00111247	0.973681	FALSE	CT	C	-0.1037	0.0124	7.737e-17	-1	I	D	-0.0347315	0.0148026	0.01896	-1	SAME	Trans-ancestry POAG	Jansen et al., 2019
22:19867771:C:T	rs1139795	NA	19753379	19908356	22:19860875:A:G	rs737854	22	19860875	G	A	0.491903	0.00110952	0.542802	FALSE	A	G	-0.0829	0.0116	9.935e-13	-1	A	G	-0.00105871	0.00252735	0.675289	-1	SAME	European POAG	Jansen et al., 2019
15:67025403:C:T	rs2439386	NA	66974553	67041110	15:67007697:T:A	rs4776315	15	67007697	A	T	0.345023	0.0010839	0.870476	FALSE	A	T	0.0592	0.0104	1.236e-08	1	A	T	0.000696871	0.00257893	0.786993	1	SAME	Trans-ancestry POAG	Jansen et al., 2019
22:19870147:C:T	rs8141610	NA	19753379	19908356	22:19860875:A:G	rs737854	22	19860875	G	A	0.493831	0.00106571	0.524914	FALSE	A	G	-0.0829	0.0116	9.935e-13	-1	A	G	-0.00105871	0.00252735	0.675289	-1	SAME	Trans-ancestry POAG	Jansen et al., 2019
10:115546535:A:G	rs72837408	NA	115380608	115589416	10:115441142:G:A	rs72641340	10	115441142	A	G	0.109645	0.00106556	0.103929	FALSE	A	G	0.0484	0.0148	0.001078	1	A	G	-0.00772396	0.00351214	0.0278623	1	OPPOSITE	Trans-ancestry POAG	Jansen et al., 2019
14:53960089:A:G	rs12433661	NA	53739097	54018406	14:53978139:TG:T	14:53978139	14	53978139	T	TG	0.481501	0.00102742	0.511635	FALSE	T	TG	-0.0405	0.0133	0.00233	1	I	D	0.00578523	0.0110442	0.6004	-1	SAME	Trans-ancestry POAG	Jansen et al., 2019
10:10840849:A:C	rs6602453	NA	10789461	10957665	10:10857912:A:T	rs7920903	10	10857912	T	A	0.245967	0.00101293	0.466708	FALSE	A	T	0.0381	0.0098	0.0001039	-1	T	A	-0.00308066	0.00217068	0.155836	1	OPPOSITE	Trans-ancestry POAG	Jansen et al., 2019
17:45695242:AT:A	rs1348518145	NA	45312813	45877799	17:45612906:G:A	rs35794672	17	45612906	A	G	0.328091	0.00100434	0.996004	FALSE	A	G	-0.0652	0.0114	1.025e-08	1	G	A	-0.0108956	0.00529013	0.0394363	-1	SAME	Trans-ancestry POAG	Jansen et al., 2019
11:115039683:G:A	rs10444329	NA	114944058	115284782	11:115039683:G:A	rs10444329	11	115039683	A	G	0.500801	0.000960398	1	FALSE	A	G	-0.0631	0.0113	2.36e-08	1	G	A	-0.000390067	0.00270602	0.885384	-1	SAME	Trans-ancestry POAG	Jansen et al., 2019
2:66537344:G:T	rs4414666	NA	66534211	66652714	2:66537344:G:T	rs4414666	2	66537344	T	G	0.532164	0.000958048	1	FALSE	T	G	-0.0799	0.0098	2.803e-16	1	G	T	-0.00207743	0.00222914	0.351365	-1	SAME	Trans-ancestry POAG	Jansen et al., 2019
9:129377855:G:C	rs1336980	NA	129250265	129415559	9:129378026:G:C	rs945686	9	129378026	C	G	0.385045	0.000934375	0.186656	FALSE	C	G	-0.1174	0.0117	9.753e-24	1	G	C	0.00148459	0.00255624	0.561394	-1	OPPOSITE	European POAG	Jansen et al., 2019
1:54123873:G:T	rs941125	NA	54036317	54198142	1:54123873:G:T	rs941125	1	54123873	T	G	0.394085	0.000932148	1	FALSE	T	G	0.0626	0.0093	2.012e-11	1	T	G	-0.000722131	0.00226208	0.749549	1	OPPOSITE	Trans-ancestry POAG	Jansen et al., 2019
6:51899824:A:G	rs2499475	NA	51826214	52046770	6:51898738:C:G	rs2163187	6	51898738	G	C	0.428449	0.000920582	0.561388	FALSE	C	G	0.0482	0.0092	1.458e-07	-1	G	C	-0.000609258	0.00221258	0.783039	1	OPPOSITE	European POAG	Jansen et al., 2019
15:74221298:C:T	rs1550437	NA	74095709	74329568	15:74229065:G:A	rs893817	15	74229065	A	G	0.398141	0.000919564	0.105187	FALSE	A	G	-0.0566	0.0094	2.126e-09	1	G	A	3.8062e-06	0.00225184	0.998651	-1	OPPOSITE	Trans-ancestry POAG	Jansen et al., 2019
16:59995651:G:T	rs190157577 (proxy)	16_59995564_A_G (Proxy from GTEx v7)	59003229	60081785	16:59991686:C:CT	rs199721151	16	59991686	CT	C	0.540564	0.000918738	0.000847639	FALSE	CT	C	0.0683	0.0345	0.04776	1	D	I	-0.113982	0.0308783	0.0002231	-1	SAME	Trans-ancestry POAG	Jansen et al., 2019
16:77661732:C:T	rs280875	NA	77523084	77739631	16:77661732:C:T	rs280875	16	77661732	T	C	0.472768	0.000909867	1	FALSE	T	C	-0.1035	0.0181	1.013e-08	1	C	T	-0.00418821	0.00401992	0.297474	-1	SAME	Trans-ancestry POAG	Jansen et al., 2019
9:113312231:G:C	rs61751937	NA	113099642	113319210	9:113189065:T:G	rs2254179	9	113189065	G	T	0.325004	0.000895886	0.0155617	FALSE	T	G	-0.0432	0.0094	4.043e-06	-1	T	G	-0.00360932	0.00226428	0.11093	-1	SAME	Trans-ancestry POAG	Jansen et al., 2019
1:38071195:C:T	rs6687545	NA	37951754	38105212	1:38058693:T:C	rs10908360	1	38058693	C	T	0.183282	0.00088541	0.873962	FALSE	T	C	-0.0454	0.0092	7.188e-07	-1	T	C	0.00179173	0.00216202	0.407258	-1	OPPOSITE	European POAG	Jansen et al., 2019
3:24510794:A:C	rs9852634	NA	24419559	24563363	3:24512855:G:A	rs4276130	3	24512855	A	G	0.493058	0.000862706	0.991819	FALSE	A	G	-0.0495	0.0092	7.995e-08	1	A	G	-0.000907531	0.00219681	0.679523	1	SAME	Trans-ancestry POAG	Jansen et al., 2019
11:120248493:A:G	rs58073046	NA	119936873	120388768	11:120316907:AAAT:A	11:120316907	11	120316907	A	AAAT	0.463747	0.000861932	0.847504	FALSE	A	AAAT	-0.109	0.0157	3.858e-12	1	I	D	0.0256665	0.0157188	0.1025	-1	SAME	European POAG	Jansen et al., 2019
7:39077397:C:T	rs10248136	NA	39005522	39279758	7:39077397:C:T	rs10248136	7	39077397	T	C	0.489737	0.000856436	1	FALSE	T	C	0.0584	0.0095	7.737e-10	1	C	T	-0.000538726	0.00216992	0.803925	-1	OPPOSITE	European POAG	Jansen et al., 2019
7:39077397:C:T	rs10248136	NA	39005522	39279758	7:39077397:C:T	rs10248136	7	39077397	T	C	0.455661	0.000850973	1	FALSE	T	C	0.0584	0.0095	7.737e-10	1	C	T	-0.000538726	0.00216992	0.803925	-1	OPPOSITE	Trans-ancestry POAG	Jansen et al., 2019
2:153364527:A:G	rs1579050	NA	152963360	153412104	2:153346845:G:T	rs3811574	2	153346845	T	G	0.481119	0.000842651	0.862424	FALSE	T	G	-0.0861	0.0102	3.245e-17	1	T	G	0.00142138	0.00216058	0.510623	1	OPPOSITE	Trans-ancestry POAG	Jansen et al., 2019
3:169239578:A:G	rs4361323	NA	169195666	169354662	3:169238015:T:C	rs1997280	3	169238015	C	T	0.358201	0.000819131	0.504977	FALSE	T	C	-0.0366	0.0098	0.0001796	-1	T	C	0.00133593	0.00220024	0.543735	-1	OPPOSITE	Trans-ancestry POAG	Jansen et al., 2019
3:56876596:T:C	rs1500708	NA	56848774	56946695	3:56888845:G:A	rs67274221	3	56888845	A	G	0.337702	0.000804525	0.197347	FALSE	A	G	0.04	0.0095	2.42e-05	1	A	G	0.000218716	0.0021803	0.920095	1	SAME	Trans-ancestry POAG	Jansen et al., 2019
9:129390800:C:T	rs3829849	NA	129250265	129423409	9:129388033:C:A	rs55770306	9	129388033	A	C	0.351229	0.000793891	0.181799	FALSE	A	C	0.1247	0.0116	8.558e-27	1	A	C	0.00164834	0.00257358	0.521858	1	SAME	Trans-ancestry POAG	Jansen et al., 2019
2:59523041:T:C	rs6713914	NA	59277406	59752036	2:59532208:T:TCAAA	rs113166590	2	59532208	TCAAA	T	0.497521	0.000774365	0.930061	FALSE	T	TCAAA	0.1627	0.0903	0.07153	-1	D	I	-0.00787927	0.010801	0.4657	-1	OPPOSITE	Trans-ancestry POAG	Jansen et al., 2019
7:11679113:A:G	rs12699251	NA	11677088	11829280	7:11681884:T:G	rs1725448	7	11681884	G	T	0.277466	0.000774004	0.241781	FALSE	T	G	-0.0466	0.0103	5.756e-06	-1	T	G	-0.00271233	0.00252428	0.2826	-1	SAME	Trans-ancestry POAG	Jansen et al., 2019
4:54027595:A:G	rs10517281	NA	53887904	54381677	4:54023351:G:A	rs7694213	4	54023351	A	G	0.48	0.000764598	0.419568	FALSE	A	G	0.0441	0.0095	3.361e-06	1	G	A	-0.000845428	0.00231477	0.714938	-1	OPPOSITE	European POAG	Jansen et al., 2019
2:153361700:T:C	rs55882252	NA	152886708	153441024	2:153346845:G:T	rs3811574	2	153346845	T	G	0.480116	0.000715636	0.979387	FALSE	T	G	-0.0861	0.0102	3.245e-17	1	T	G	0.00142138	0.00216058	0.510623	1	OPPOSITE	European POAG	Jansen et al., 2019
1:38076621:C:T	rs10908363	NA	37951754	38105212	1:38078300:A:G	rs4652964	1	38078300	G	A	0.155756	0.00071435	0.979186	FALSE	A	G	-0.05	0.0092	4.983e-08	-1	A	G	0.00209584	0.00216455	0.332916	-1	OPPOSITE	Trans-ancestry POAG	Jansen et al., 2019
2:213760746:AT:A	rs200621439	NA	213576550	213771998	2:213723819:G:A	rs4307771	2	213723819	A	G	0.564274	0.000713462	0.775469	FALSE	A	G	0.0922	0.0145	1.784e-10	1	G	A	-0.00296443	0.00306992	0.334226	-1	OPPOSITE	Trans-ancestry POAG	Jansen et al., 2019
11:86368106:T:C	rs10792871	NA	86209612	86413386	11:86368106:T:C	rs10792871	11	86368106	C	T	0.44796	0.000711769	1	FALSE	T	C	0.1146	0.0142	6.488e-16	-1	T	C	-0.00198365	0.00388363	0.609511	-1	OPPOSITE	Trans-ancestry POAG	Jansen et al., 2019
11:86490580:G:A	rs12786875	NA	86427342	86571591	11:86399327:T:C	rs543336	11	86399327	C	T	0.415834	0.000710213	0.0512388	FALSE	T	C	0.0604	0.0103	3.898e-09	-1	T	C	0.0013673	0.00240528	0.569725	-1	SAME	European POAG	Jansen et al., 2019
8:108273318:T:G	rs2514879	NA	108188066	108391134	8:108273318:T:G	rs2514879	8	108273318	G	T	0.324793	0.000708726	1	FALSE	T	G	-0.1266	0.0129	1.198e-22	-1	T	G	-0.00213796	0.00362844	0.555711	-1	SAME	Trans-ancestry POAG	Jansen et al., 2019
14:76371658:G:C	rs4903352	NA	75966976	76689840	14:76210553:T:C	rs17103645	14	76210553	C	T	0.501566	0.000698588	0.199076	FALSE	T	C	0.0543	0.0104	1.651e-07	-1	C	T	0.00207019	0.00259326	0.424699	1	SAME	Trans-ancestry POAG	Jansen et al., 2019
20:6507717:G:A	rs6117318	NA	6213813	6637234	20:6540290:T:G	rs1407029	20	6540290	G	T	0.360478	0.000681965	0.560454	FALSE	T	G	0.068	0.0099	6.741e-12	-1	T	G	0.00292959	0.00232111	0.206894	-1	SAME	European POAG	Jansen et al., 2019
6:36586070:G:A	rs12208086	NA	36345180	36611868	6:36414308:A:T	rs6457918	6	36414308	T	A	0.193974	0.000681236	0.409381	FALSE	A	T	0.0345	0.0097	0.0003755	-1	A	T	-0.00323814	0.00228804	0.156996	-1	OPPOSITE	European POAG	Jansen et al., 2019
20:6470094:G:A	rs2326788	NA	6276055	6637234	20:6540290:T:G	rs1407029	20	6540290	G	T	0.3321	0.000660992	0.493541	FALSE	T	G	0.068	0.0099	6.741e-12	-1	T	G	0.00292959	0.00232111	0.206894	-1	SAME	Trans-ancestry POAG	Jansen et al., 2019
17:44087500:A:G	rs41543317	NA	43463493	44904147	17:44087500:A:G	rs41543317	17	44087500	G	A	0.782316	0.00062963	1	FALSE	A	G	-0.0619	0.0103	1.905e-09	-1	A	G	0.00416911	0.00221584	0.0599035	-1	OPPOSITE	European POAG	Jansen et al., 2019
4:54027595:A:G	rs10517281	NA	53887904	54381677	4:54023351:G:A	rs7694213	4	54023351	A	G	0.394483	0.000605299	0.419568	FALSE	A	G	0.0441	0.0095	3.361e-06	1	G	A	-0.000845428	0.00231477	0.714938	-1	OPPOSITE	Trans-ancestry POAG	Jansen et al., 2019
4:7899379:C:T	rs6845653	NA	7759296	7973142	4:7899379:C:T	rs6845653	4	7899379	T	C	0.49921	0.000602067	1	FALSE	T	C	-0.1264	0.0096	8.662e-40	1	C	T	-0.000133208	0.00243821	0.95643	-1	SAME	European POAG	Jansen et al., 2019
2:12890860:T:C	rs2113818	NA	12804436	13068075	2:12867403:A:G	rs17511374	2	12867403	G	A	0.240477	0.000599743	0.362488	FALSE	A	G	0.0598	0.0096	3.949e-10	-1	G	A	-0.000965516	0.00216025	0.654914	1	OPPOSITE	European POAG	Jansen et al., 2019
1:101095202:A:G	rs12566440	NA	100798137	101195659	1:101111205:C:A	rs1981134	1	101111205	A	C	0.115827	0.000561409	0.635802	FALSE	A	C	-0.0582	0.0089	7.923e-11	1	C	A	-0.00405867	0.00215877	0.0600966	-1	SAME	Trans-ancestry POAG	Jansen et al., 2019
10:78282063:T:C	rs2637250	NA	78057746	78638957	10:78274818:T:C	rs2130800	10	78274818	C	T	0.428293	0.000556924	0.846992	FALSE	T	C	0.049	0.009	4.877e-08	-1	T	C	0.000479348	0.00216853	0.825056	-1	SAME	Trans-ancestry POAG	Jansen et al., 2019
1:103385373:G:A	rs993471	NA	102902818	103756881	1:103678371:T:C	rs1528206	1	103678371	C	T	0.489719	0.000554056	0.0772484	FALSE	T	C	-0.046	0.0097	1.907e-06	-1	C	T	-0.00248919	0.00215678	0.248449	1	SAME	European POAG	Jansen et al., 2019
2:66537344:G:T	rs4414666	NA	66534211	66652714	2:66537344:G:T	rs4414666	2	66537344	T	G	0.360853	0.000543947	1	FALSE	T	G	-0.0799	0.0098	2.803e-16	1	G	T	-0.00207743	0.00222914	0.351365	-1	SAME	European POAG	Jansen et al., 2019
6:158971424:T:C	rs13197977	NA	158907243	159101908	6:158974222:G:GA	rs5881273	6	158974222	GA	G	0.32168	0.000540475	0.740655	FALSE	G	GA	0.0499	0.0118	2.345e-05	-1	D	I	0.00305072	0.0107316	0.7762	-1	SAME	European POAG	Jansen et al., 2019
12:111932800:C:T	rs7137828	NA	111335752	112928451	12:111932800:C:T	rs7137828	12	111932800	T	C	0.428531	0.000539173	1	FALSE	T	C	0.0677	0.0108	3.324e-10	1	C	T	-0.00224364	0.00216915	0.300977	-1	OPPOSITE	European POAG	Jansen et al., 2019
7:134520521:C:A	rs10237321	NA	134474200	134873964	7:134505463:A:G	rs7800283	7	134505463	G	A	0.266481	0.000526119	0.0347957	FALSE	A	G	-0.0286	0.0091	0.001669	-1	A	G	-0.000549522	0.00216956	0.800046	-1	SAME	Trans-ancestry POAG	Jansen et al., 2019
5:55783678:G:A	rs112142644	NA	55765866	55828423	5:55783678:G:A	rs112142644	5	55783678	A	G	0.504451	0.000521021	1	FALSE	A	G	0.1303	0.0162	1.015e-15	1	A	G	-0.00424019	0.012357	0.731493	1	OPPOSITE	Trans-ancestry POAG	Jansen et al., 2019
12:28203245:T:A	rs7972874	NA	28124784	28740649	12:28218232:T:C	rs229988	12	28218232	C	T	0.605348	0.000519395	0.309899	FALSE	T	C	-0.0315	0.0094	0.000772	-1	T	C	0.00335744	0.00217156	0.122081	-1	OPPOSITE	European POAG	Jansen et al., 2019
8:30454209:CA:C	rs35740987	NA	30200973	30621226	8:30499813:C:CAA	rs111359940	8	30499813	CAA	C	0.202377	0.000506844	0.587987	FALSE	CAA	C	-0.0489	0.0115	2.253e-05	1	D	I	-0.00976164	0.0107243	0.3627	-1	OPPOSITE	Trans-ancestry POAG	Jansen et al., 2019
7:115801846:T:C	rs9649390	NA	115515534	115990960	7:115927959:G:T	rs9692117	7	115927959	T	G	0.29478	0.000500862	0.279375	FALSE	T	G	-0.0568	0.009	2.969e-10	1	T	G	0.000900437	0.00230098	0.695555	1	OPPOSITE	European POAG	Jansen et al., 2019
4:111963719:C:T	rs17527016	NA	111937018	112004976	4:112024834:A:G	rs1615239	4	112024834	G	A	0.385308	0.000490248	0.00169546	FALSE	A	G	0.0059	0.0115	0.6066	-1	A	G	-0.00630224	0.0025298	0.0127312	-1	OPPOSITE	European POAG	Jansen et al., 2019
1:165737704:C:G	rs2790053	NA	165466877	165799140	1:165701744:A:C	rs35229159	1	165701744	C	A	0.401928	0.000465196	0.534365	FALSE	A	C	-0.2503	0.0198	1.313e-36	-1	A	C	-0.00131726	0.0139556	0.9248	-1	SAME	Trans-ancestry POAG	Jansen et al., 2019
1:165743523:A:G	rs2790049	NA	165466877	165799140	1:165701744:A:C	rs35229159	1	165701744	C	A	0.396623	0.000462105	0.528508	FALSE	A	C	-0.2503	0.0198	1.313e-36	-1	A	C	-0.00131726	0.0139556	0.9248	-1	SAME	European POAG	Jansen et al., 2019
4:89752276:G:A	rs57400569	NA	89743582	90084648	4:89752276:G:A	rs57400569	4	89752276	A	G	0.279695	0.000461373	1	FALSE	A	G	-0.0574	0.0105	4.219e-08	1	A	G	0.000159167	0.00248391	0.948907	1	OPPOSITE	Trans-ancestry POAG	Jansen et al., 2019
12:111932800:C:T	rs7137828	NA	111335752	112928451	12:111932800:C:T	rs7137828	12	111932800	T	C	0.370002	0.000458103	1	FALSE	T	C	0.0677	0.0108	3.324e-10	1	C	T	-0.00224364	0.00216915	0.300977	-1	OPPOSITE	Trans-ancestry POAG	Jansen et al., 2019
14:60976537:C:A	rs33912345	NA	60786981	61583340	14:60976537:C:A	rs33912345	14	60976537	A	C	0.522977	0.000457694	1	FALSE	A	C	-0.1606	0.0096	2.177e-62	1	C	A	-0.00176026	0.00218229	0.41989	-1	SAME	European POAG	Jansen et al., 2019
8:108277130:G:T	rs2514885	NA	108188066	108391134	8:108278616:C:A	rs10505100	8	108278616	A	C	0.21006	0.000451986	0.979924	FALSE	A	C	-0.1194	0.0129	2.426e-20	1	A	C	-0.00227047	0.003403	0.504647	1	SAME	European POAG	Jansen et al., 2019
3:105073472:A:C	rs6437582	NA	105001491	105314429	3:105082472:C:A	rs12497260	3	105082472	A	C	0.328523	0.000451944	0.957717	FALSE	A	C	-0.046	0.0093	7.129e-07	1	A	C	0.000816137	0.00224309	0.715973	1	OPPOSITE	Trans-ancestry POAG	Jansen et al., 2019
8:124554317:A:T	rs62521288	NA	124365166	124812731	8:124498734:T:G	rs12548263	8	124498734	G	T	0.347747	0.000437127	0.0822627	FALSE	T	G	0.0488	0.0098	6.721e-07	-1	T	G	-0.0017954	0.00239614	0.453684	-1	OPPOSITE	Trans-ancestry POAG	Jansen et al., 2019
14:60976537:C:A	rs33912345	NA	60786981	61583340	14:60976537:C:A	rs33912345	14	60976537	A	C	0.495154	0.000436663	1	FALSE	A	C	-0.1606	0.0096	2.177e-62	1	C	A	-0.00176026	0.00218229	0.41989	-1	SAME	Trans-ancestry POAG	Jansen et al., 2019
17:59239221:A:G	rs11868441	NA	58680140	59312394	17:59239221:A:G	rs11868441	17	59239221	G	A	0.156578	0.000426076	1	FALSE	A	G	0.0752	0.0111	1.488e-11	-1	A	G	0.00277976	0.002596	0.284266	-1	SAME	Trans-ancestry POAG	Jansen et al., 2019
7:83287607:G:A	rs1972459	NA	83029742	83330990	7:83267983:A:C	rs536299	7	83267983	C	A	0.285108	0.000424855	0.847432	FALSE	A	C	0.0591	0.0095	6.066e-10	-1	A	C	0.000513912	0.00228972	0.822413	-1	SAME	European POAG	Jansen et al., 2019
6:1987897:T:A	rs4512269	NA	1850512	2265344	6:1987897:T:A	rs4512269	6	1987897	A	T	0.1836	0.000418633	1	FALSE	A	T	0.1183	0.013	1.205e-19	1	T	A	-0.00349532	0.00728299	0.631278	-1	OPPOSITE	European POAG	Jansen et al., 2019
20:18010447:T:G	rs7275118	NA	17908137	18041960	20:18010447:T:G	rs7275118	20	18010447	G	T	0.247992	0.000418458	1	FALSE	T	G	0.0277	0.0095	0.003455	-1	G	T	-0.000359164	0.00227831	0.874737	1	OPPOSITE	European POAG	Jansen et al., 2019
2:28365914:G:A	rs17006576	NA	27606586	28597624	2:28303713:C:T	rs2337699	2	28303713	T	C	0.266129	0.000411072	0.316498	FALSE	T	C	0.0443	0.0092	1.412e-06	1	C	T	-0.00078251	0.00217976	0.719603	-1	OPPOSITE	Trans-ancestry POAG	Jansen et al., 2019
16:51601948:C:T	rs114367221	NA	51425597	51854860	16:51539762:T:A	rs12596721	16	51539762	A	T	0.481371	0.000408469	0.691319	FALSE	A	T	-0.0833	0.018	3.692e-06	1	T	A	0.00189195	0.00993936	0.849036	-1	OPPOSITE	Trans-ancestry POAG	Jansen et al., 2019
6:158971266:A:G	rs13194719	NA	158907243	159101908	6:158974222:G:GA	rs5881273	6	158974222	GA	G	0.220711	0.000384127	0.764745	FALSE	G	GA	0.0499	0.0118	2.345e-05	-1	D	I	0.00305072	0.0107316	0.7762	-1	SAME	Trans-ancestry POAG	Jansen et al., 2019
10:10840849:A:C	rs6602453	NA	10789461	10957665	10:10873705:T:C	rs7908841	10	10873705	C	T	0.103949	0.0003788	0.420495	FALSE	T	C	0.0368	0.0095	0.0001024	-1	C	T	-0.00356755	0.00216252	0.099	1	OPPOSITE	European POAG	Jansen et al., 2019
1:162679145:G:A	rs4542196	NA	162590219	162823107	1:162669776:G:A	rs72711557	1	162669776	A	G	0.238024	0.000366136	0.26573	FALSE	A	G	0.0665	0.013	3.429e-07	1	A	G	0.000732594	0.00352609	0.835413	1	SAME	Trans-ancestry POAG	Jansen et al., 2019
4:7904363:G:A	rs938604	NA	7759296	7973142	4:7905384:T:C	rs2385909	4	7905384	C	T	0.285899	0.000362011	0.991588	FALSE	T	C	0.1423	0.0095	2.405e-50	-1	T	C	0.00109322	0.0021883	0.617375	-1	SAME	Trans-ancestry POAG	Jansen et al., 2019
6:45928400:C:T	rs1555214	NA	45856968	45974403	6:45928400:C:T	rs1555214	6	45928400	T	C	0.218067	0.000345885	1	FALSE	T	C	0.056	0.0098	9.963e-09	1	C	T	-0.00169846	0.00221872	0.443965	-1	OPPOSITE	European POAG	Jansen et al., 2019
1:219215137:G:A	rs6667536	NA	219097514	219563344	1:219127046:G:A	rs589217	1	219127046	A	G	0.130816	0.000345045	0.871191	FALSE	A	G	0.12	0.0212	1.546e-08	1	G	A	-0.00496339	0.00398788	0.213271	-1	OPPOSITE	Trans-ancestry POAG	Jansen et al., 2019
3:25581798:C:T	rs1286770	NA	25520582	25624922	3:25550240:C:A	rs62235660	3	25550240	A	C	0.121171	0.000339036	0.0736873	FALSE	A	C	0.0118	0.0092	0.2009	1	C	A	0.00593728	0.00218832	0.00666438	-1	SAME	Trans-ancestry POAG	Jansen et al., 2019
11:128387422:T:C	rs7946009	NA	128305460	128472338	11:128403208:T:C	rs6590334	11	128403208	C	T	0.135337	0.000338018	0.455975	FALSE	T	C	-0.0378	0.0096	7.817e-05	-1	T	C	-0.000769956	0.00216084	0.721599	-1	SAME	European POAG	Jansen et al., 2019
13:73639371:G:A	rs9530143	NA	73191635	73722830	13:73579592:G:A	rs4885056	13	73579592	A	G	0.365515	0.0003317	0.286928	FALSE	A	G	0.0559	0.0107	1.959e-07	1	G	A	3.72242e-05	0.00245822	0.987918	-1	SAME	Trans-ancestry POAG	Jansen et al., 2019
10:96023077:T:C	rs57866767	NA	95951880	97002701	10:96013705:G:A	rs9419788	10	96013705	A	G	0.394331	0.000315064	0.514985	FALSE	A	G	0.0407	0.0096	2.228e-05	1	G	A	-0.00221753	0.00223549	0.321216	-1	OPPOSITE	Trans-ancestry POAG	Jansen et al., 2019
6:45919758:G:A	rs3777588	NA	45856968	45974403	6:45928400:C:T	rs1555214	6	45928400	T	C	0.198983	0.00031503	0.995697	FALSE	T	C	0.056	0.0098	9.963e-09	1	C	T	-0.00169846	0.00221872	0.443965	-1	OPPOSITE	Trans-ancestry POAG	Jansen et al., 2019
6:51414922:C:T	rs72904286	NA	50950990	51698892	6:51460154:T:G	rs2579989	6	51460154	G	T	0.30411	0.000312842	0.915065	FALSE	T	G	-0.1593	0.0152	1.544e-25	-1	T	G	-0.00806023	0.00336619	0.0166446	-1	SAME	Trans-ancestry POAG	Jansen et al., 2019
22:18377329:G:A	rs8140413	NA	18313591	18481316	22:18317095:T:C	rs453005	22	18317095	C	T	0.16307	0.000312001	0.048261	FALSE	T	C	-0.0344	0.0108	0.001517	-1	T	C	0.00402772	0.00220143	0.0673106	-1	OPPOSITE	European POAG	Jansen et al., 2019
1:8495590:A:G	rs172531	NA	8352039	8980813	1:8436802:C:T	rs6678140	1	8436802	T	C	0.158142	0.000300219	0.965253	FALSE	T	C	-0.0564	0.0101	2.13e-08	1	C	T	-0.00266887	0.0023415	0.254365	-1	SAME	Trans-ancestry POAG	Jansen et al., 2019
9:107695539:T:C	rs2472494	NA	107676758	107770735	9:107695848:G:A	rs2472493	9	107695848	A	G	0.312977	0.000297423	0.996131	FALSE	A	G	-0.1778	0.0092	1.036e-82	1	G	A	0.00126933	0.00222017	0.567506	-1	OPPOSITE	Trans-ancestry POAG	Jansen et al., 2019
16:65055840:G:T	rs257336	NA	64880609	65286870	16:64950482:C:A	rs8048383	16	64950482	A	C	0.172488	0.000277251	0.215397	FALSE	A	C	0.0321	0.0094	0.000605	1	C	A	0.00060036	0.00217943	0.782957	-1	SAME	European POAG	Jansen et al., 2019
21:27216839:T:A	rs13049669	NA	26773583	27266867	21:27245456:C:T	rs34471515	21	27245456	T	C	0.250803	0.00027285	0.903063	FALSE	T	C	-0.087	0.0155	2.155e-08	1	T	C	-0.000905844	0.00407529	0.824098	1	SAME	Trans-ancestry POAG	Jansen et al., 2019
4:111963719:C:T	rs17527016	NA	111937018	112004976	4:112024834:A:G	rs1615239	4	112024834	G	A	0.406582	0.000261915	0.00169546	FALSE	A	G	0.0059	0.0115	0.6066	-1	A	G	-0.00630224	0.0025298	0.0127312	-1	OPPOSITE	Trans-ancestry POAG	Jansen et al., 2019
7:82949529:T:G	rs7805468	NA	82775913	83101782	7:82958769:T:C	rs6959377	7	82958769	C	T	0.170635	0.000244412	0.963727	FALSE	T	C	-0.0598	0.0091	5.033e-11	-1	C	T	0.00108834	0.00216943	0.615898	1	OPPOSITE	Trans-ancestry POAG	Jansen et al., 2019
1:103379918:G:A	rs3753841	NA	102902818	103756881	1:103214274:G:A	rs6577334	1	103214274	A	G	0.299491	0.000242717	0.757928	FALSE	A	G	0.0583	0.0093	4.234e-10	1	A	G	0.00117125	0.00223121	0.599624	1	SAME	Trans-ancestry POAG	Jansen et al., 2019
9:107695539:T:C	rs2472494	NA	107676758	107770735	9:107690709:C:G	rs1800976	9	107690709	G	C	0.253696	0.000241199	0.565616	FALSE	C	G	0.1344	0.0091	3.509e-49	-1	G	C	-0.00446527	0.00528741	0.398385	1	OPPOSITE	European POAG	Jansen et al., 2019
3:85172364:G:C	rs13101042	NA	84776802	85683600	3:85138818:T:C	rs9883252	3	85138818	C	T	0.169096	0.000236712	0.951331	FALSE	T	C	0.089	0.0095	1.201e-20	-1	T	C	0.00354054	0.00218518	0.105178	-1	SAME	Trans-ancestry POAG	Jansen et al., 2019
8:6377141:C:G	rs2515437	NA	6239164	6393413	8:6354159:T:C	rs2922806	8	6354159	C	T	0.119248	0.000235636	0.0967229	FALSE	T	C	0.0386	0.0106	0.0002762	-1	T	C	0.0105498	0.00610539	0.0839963	-1	SAME	Trans-ancestry POAG	Jansen et al., 2019
11:86355565:C:T	rs581796	NA	86209612	86413386	11:86361508:G:A	rs686768	11	86361508	A	G	0.145895	0.000232482	0.947784	FALSE	A	G	-0.1114	0.0142	4.913e-15	1	G	A	-0.00207974	0.00389667	0.593533	-1	SAME	European POAG	Jansen et al., 2019
6:602983:A:C	rs17135357	NA	507364	758665	6:614375:T:G	rs1747586	6	614375	G	T	0.347208	0.000227603	0.633255	FALSE	T	G	0.0804	0.0108	1.222e-13	-1	T	G	-0.00138364	0.00266805	0.604042	-1	OPPOSITE	European POAG	Jansen et al., 2019
6:30086422:G:C	rs9261431	NA	29545494	30735105	6:29768344:T:C	rs1611185	6	29768344	C	T	0.434507	0.000225107	0.360167	FALSE	T	C	-0.0435	0.0093	2.654e-06	-1	C	T	-0.00593619	0.00218145	0.00650431	1	SAME	European POAG	Jansen et al., 2019
7:103624813:A:G	rs12667675	NA	103581626	103883443	7:103621872:A:G	rs11984351	7	103621872	G	A	0.182433	0.000222542	0.108041	FALSE	A	G	-0.0374	0.0091	4.162e-05	-1	G	A	0.00166802	0.00217561	0.443267	1	OPPOSITE	Trans-ancestry POAG	Jansen et al., 2019
6:51460154:T:G	rs2579989	NA	50950990	51698892	6:51460154:T:G	rs2579989	6	51460154	G	T	0.229358	0.000217462	1	FALSE	T	G	-0.1593	0.0152	1.544e-25	-1	T	G	-0.00806023	0.00336619	0.0166446	-1	SAME	European POAG	Jansen et al., 2019
3:171821356:A:G	rs62283813	NA	171765125	171832535	3:171821356:A:G	rs62283813	3	171821356	G	A	0.0800102	0.000208097	1	FALSE	A	G	-0.1375	0.016	1.025e-17	-1	G	A	0.000663146	0.00451018	0.883106	1	OPPOSITE	Trans-ancestry POAG	Jansen et al., 2019
15:92331707:A:G	rs8038628	NA	92326758	92448860	15:92413947:T:G	rs7179829	15	92413947	G	T	0.0705072	0.00020044	0.0807111	FALSE	T	G	-0.0274	0.0103	0.00763	-1	T	G	0.0253251	0.0107157	0.01811	-1	OPPOSITE	Trans-ancestry POAG	Jansen et al., 2019
22:29108229:A:G	rs5752776	NA	28206194	29429955	22:29115066:C:T	rs4822983	22	29115066	T	C	0.251198	0.000198719	0.995681	FALSE	T	C	-0.0764	0.0105	2.96e-13	1	T	C	0.00033948	0.00238898	0.886999	1	OPPOSITE	Trans-ancestry POAG	Jansen et al., 2019
10:94929116:C:T	rs10882167	NA	94849871	95092324	10:94954567:A:C	rs4918902	10	94954567	C	A	0.0885668	0.000175008	0.786773	FALSE	A	C	0.0598	0.0096	4.641e-10	-1	A	C	0.00171748	0.00216921	0.428504	-1	SAME	Trans-ancestry POAG	Jansen et al., 2019
9:129920463:G:A	rs2027312	NA	129614851	130223754	9:129952141:G:A	rs1890546	9	129952141	A	G	0.101843	0.000172262	0.828449	FALSE	A	G	-0.0531	0.0095	2.149e-08	1	G	A	0.000725074	0.00217193	0.738501	-1	OPPOSITE	European POAG	Jansen et al., 2019
10:126278648:T:C	rs10430737	NA	126174173	126551900	10:126278648:T:C	rs10430737	10	126278648	C	T	0.406585	0.000172235	1	FALSE	T	C	0.0595	0.0094	2.319e-10	-1	T	C	-0.00276945	0.00224565	0.217481	-1	OPPOSITE	Trans-ancestry POAG	Jansen et al., 2019
15:57473075:T:C	rs2431023 (proxy)	15_57553832_A_T (Proxy from GTEx v7)	56787114	57643367	15:57332971:A:G	rs1820995	15	57332971	G	A	0.166344	0.000168654	0.920673	FALSE	A	G	-0.0581	0.009	1.129e-10	-1	G	A	0.00147256	0.00217928	0.499226	1	OPPOSITE	Trans-ancestry POAG	Jansen et al., 2019
16:65067443:C:T	rs12447201	NA	64880609	65286870	16:65067176:T:C	rs8053532	16	65067176	C	T	0.101281	0.000164361	0.229902	FALSE	T	C	-0.0409	0.0115	0.0003981	-1	T	C	0.00377226	0.0107191	0.7249	-1	OPPOSITE	Trans-ancestry POAG	Jansen et al., 2019
3:85144350:G:A	rs9819278	NA	84776802	85683600	3:85073170:T:C	rs6791363	3	85073170	C	T	0.101018	0.000154937	0.339876	FALSE	T	C	0.07	0.0103	1.304e-11	-1	C	T	-0.00186568	0.00226854	0.41084	1	OPPOSITE	European POAG	Jansen et al., 2019
17:58830188:A:G	rs11658334	NA	58655882	59312145	17:58854993:G:A	rs9903592	17	58854993	A	G	0.0737507	0.000153523	0.926017	FALSE	A	G	0.0688	0.0158	1.295e-05	1	A	G	0.00080449	0.00370909	0.828289	1	SAME	European POAG	Jansen et al., 2019
7:35961137:C:T	rs6957752	NA	35584178	36067466	7:35961137:C:T	rs6957752	7	35961137	T	C	0.0480669	0.000137336	1	FALSE	T	C	0.0526	0.0095	3.629e-08	1	C	T	-0.00281557	0.00219899	0.200408	-1	OPPOSITE	Trans-ancestry POAG	Jansen et al., 2019
3:171820211:T:G	rs62283809	NA	171765125	171832535	3:171820211:T:G	rs62283809	3	171820211	G	T	0.0505918	0.000137289	1	FALSE	T	G	-0.1332	0.0157	2.605e-17	-1	G	T	0.00097383	0.00422683	0.817787	1	OPPOSITE	European POAG	Jansen et al., 2019
6:122645298:A:C	rs7760346	NA	122379099	123005705	6:122645298:A:C	rs7760346	6	122645298	C	A	0.0938406	0.000132523	1	FALSE	A	C	-0.05	0.0091	4.711e-08	-1	C	A	-0.00279138	0.00223696	0.212087	1	SAME	Trans-ancestry POAG	Jansen et al., 2019
11:102064834:C:A	rs7120067	NA	101895958	102157900	11:102066240:G:T	rs12421242	11	102066240	T	G	0.339704	0.000131175	0.942888	FALSE	T	G	0.0537	0.0095	1.637e-08	1	T	G	0.00517823	0.0022665	0.0223314	1	SAME	Trans-ancestry POAG	Jansen et al., 2019
1:36579215:G:A	rs4653159	NA	35926150	36855033	1:36555758:C:T	rs3767703	1	36555758	T	C	0.0549012	0.000125926	0.157442	FALSE	T	C	-0.0574	0.0158	0.0002889	1	T	C	-0.00652382	0.00393991	0.0977566	1	SAME	European POAG	Jansen et al., 2019
7:82955177:C:G	rs4577906	NA	82775913	83093742	7:82952242:T:G	rs9642159	7	82952242	G	T	0.0825121	0.000123589	0.959008	FALSE	T	G	0.0613	0.0091	2.025e-11	-1	T	G	0.00118456	0.00216776	0.584761	-1	SAME	European POAG	Jansen et al., 2019
12:28203245:T:A	rs7972874	NA	28124784	28740649	12:28218232:T:C	rs229988	12	28218232	C	T	0.169667	0.000109242	0.309899	FALSE	T	C	-0.0315	0.0094	0.000772	-1	T	C	0.00335744	0.00217156	0.122081	-1	OPPOSITE	Trans-ancestry POAG	Jansen et al., 2019
9:136131188:C:T	rs8176749	NA	135442074	136388148	9:136098920:G:A	rs4486266	9	136098920	A	G	0.0832036	8.26517e-05	0.367709	FALSE	A	G	-0.0332	0.0116	0.004257	1	G	A	0.0057092	0.00279478	0.0410712	-1	OPPOSITE	Trans-ancestry POAG	Jansen et al., 2019
1:171605478:G:A	rs74315329	1_171858552_A_T (Proxy from GTEx v7)	171225981	172180179	1:171863917:T:C	rs4916237	1	171863917	C	T	0.0809645	8.08445e-05	0.0038509	FALSE	T	C	0.0317	0.0091	0.000477	-1	T	C	-0.00136746	0.00217822	0.530142	-1	OPPOSITE	European POAG	Jansen et al., 2019
1:171858552:A:T	rs74315329 (proxy)	1_171605478_G_A (Proxy from GTEx v7)	171225981	172180179	1:171822625:A:T	rs55702618	1	171822625	T	A	0.0937683	7.88586e-05	0.000836824	FALSE	A	T	-0.1114	0.0194	9.297e-09	-1	T	A	-0.00107963	0.00441847	0.806964	1	SAME	Trans-ancestry POAG	Jansen et al., 2019
17:2201944:A:G	rs216197	NA	1931965	2296014	17:2165340:A:G	rs7213232	17	2165340	G	A	0.0310399	7.86796e-05	0.995673	FALSE	A	G	0.0589	0.0096	8.117e-10	-1	G	A	0.00233002	0.00224865	0.300115	1	SAME	Trans-ancestry POAG	Jansen et al., 2019
6:134372150:C:G	rs2811688	NA	134364060	134382456	6:134372711:G:T	rs2811689	6	134372711	T	G	0.526018	6.7376e-05	0.898539	FALSE	T	G	0.051	0.0094	6.668e-08	1	T	G	-0.00127679	0.00216898	0.55609	1	OPPOSITE	Trans-ancestry POAG	Jansen et al., 2019
6:134372150:C:G	rs2811688	NA	134364060	134382456	6:134372711:G:T	rs2811689	6	134372711	T	G	0.525094	6.70072e-05	0.898539	FALSE	T	G	0.051	0.0094	6.668e-08	1	T	G	-0.00127679	0.00216898	0.55609	1	OPPOSITE	European POAG	Jansen et al., 2019
15:61947280:C:G	rs12438742	NA	61911182	62062443	15:61958029:A:C	rs2249195	15	61958029	C	A	0.317515	5.64991e-05	0.900773	FALSE	A	C	0.0506	0.0092	4.105e-08	-1	C	A	0.00161463	0.00217904	0.458704	1	SAME	Trans-ancestry POAG	Jansen et al., 2019
15:57538801:T:A	rs935328	NA	56788798	57643367	15:57543239:G:A	rs2593234	15	57543239	A	G	0.0571954	5.40597e-05	0.9603	FALSE	A	G	-0.0662	0.0106	4.581e-10	1	G	A	0.00163496	0.00253332	0.518679	-1	OPPOSITE	European POAG	Jansen et al., 2019
1:88213014:T:C	rs12139208	NA	88092852	88236589	1:88213014:T:C	rs12139208	1	88213014	C	T	0.487598	4.99683e-05	1	FALSE	T	C	0.0541	0.0094	9.551e-09	-1	T	C	-0.000335219	0.00222823	0.880416	-1	OPPOSITE	Trans-ancestry POAG	Jansen et al., 2019
15:61947280:C:G	rs12438742	NA	61911182	62062443	15:61999944:T:C	rs2251318	15	61999944	C	T	0.33429	4.93086e-05	0.157685	FALSE	T	C	0.0395	0.0104	0.0001372	-1	T	C	-0.00121332	0.00247812	0.624409	-1	OPPOSITE	European POAG	Jansen et al., 2019
6:29806901:C:G	rs407238/rs115586772	NA	28808992	30803526	6:29896680:A:G	rs2517754	6	29896680	G	A	0.331344	4.52081e-05	0.488784	FALSE	A	G	-0.0649	0.0102	2.329e-10	-1	G	A	0.0041599	0.00529998	0.432519	1	OPPOSITE	Trans-ancestry POAG	Jansen et al., 2019
14:75084829:G:A	rs754458	NA	75019157	75411006	14:75084829:G:A	rs754458	14	75084829	A	G	0.36617	4.12351e-05	1	FALSE	A	G	0.0586	0.0093	3.083e-10	1	A	G	-5.17172e-05	0.00215959	0.980894	1	OPPOSITE	Trans-ancestry POAG	Jansen et al., 2019
2:69411517:A:C	rs6732795	NA	69344594	69459151	2:69407732:T:C	rs11126221	2	69407732	C	T	0.505787	3.30625e-05	0.591673	FALSE	T	C	-0.0397	0.0094	2.513e-05	-1	T	C	-0.000644451	0.00216505	0.765962	-1	SAME	Trans-ancestry POAG	Jansen et al., 2019
12:84023388:T:C	rs2667477	NA	83587921	84997620	12:84023388:T:C	rs2667477	12	84023388	C	T	0.0565222	3.23635e-05	1	FALSE	T	C	-0.0736	0.0095	1.041e-14	-1	T	C	-0.000513039	0.00217264	0.813327	-1	SAME	European POAG	Jansen et al., 2019
12:83948055:T:C	rs324788	NA	83587921	84947046	12:83948055:T:C	rs324788	12	83948055	C	T	0.0498021	2.93266e-05	1	FALSE	T	C	-0.0741	0.0095	8.239e-15	-1	C	T	0.000629938	0.00217554	0.772157	1	OPPOSITE	Trans-ancestry POAG	Jansen et al., 2019
3:186128816:A:G	rs56233426	NA	186103439	186207417	3:186134419:A:G	rs4588350	3	186134419	G	A	0.514655	2.62288e-05	0.296652	FALSE	A	G	-0.0544	0.0103	1.298e-07	-1	G	A	-0.00175778	0.00231931	0.448516	1	SAME	Trans-ancestry POAG	Jansen et al., 2019
3:186128816:A:G	rs56233426	NA	186103439	186207417	3:186134419:A:G	rs4588350	3	186134419	G	A	0.53927	2.11865e-05	0.296652	FALSE	A	G	-0.0544	0.0103	1.298e-07	-1	G	A	-0.00175778	0.00231931	0.448516	1	SAME	European POAG	Jansen et al., 2019
13:76258720:A:G	rs9544024	NA	76030580	76502584	13:76249275:T:C	rs9530458	13	76249275	C	T	0.501397	1.11857e-05	0.970854	FALSE	T	C	0.0535	0.0099	6.041e-08	-1	C	T	-0.000399827	0.00216052	0.853181	1	OPPOSITE	Trans-ancestry POAG	Jansen et al., 2019
13:76254433:A:G	rs111439095	NA	76068181	76502584	13:76249275:T:C	rs9530458	13	76249275	C	T	0.503499	1.07483e-05	0.966806	FALSE	T	C	0.0535	0.0099	6.041e-08	-1	C	T	-0.000399827	0.00216052	0.853181	1	OPPOSITE	European POAG	Jansen et al., 2019
11:130282078:T:C	rs2875238	NA	130257825	130332338	11:130273230:A:T	rs11222084	11	130273230	T	A	0.621422	9.84876e-06	0.681534	FALSE	A	T	0.0582	0.0104	2.186e-08	-1	T	A	0.00363962	0.00228966	0.111928	1	SAME	Trans-ancestry POAG	Jansen et al., 2019
14:53386836:G:C	rs8009633	NA	53095602	53472513	14:53346931:T:C	rs7149638	14	53346931	C	T	0.143941	1.37335e-06	0.0283379	FALSE	T	C	-0.0036	0.0131	0.7842	-1	T	C	0.0167527	0.00353327	2.12212e-06	-1	OPPOSITE	European POAG	Jansen et al., 2019
20:38074218:T:C	rs6101546	NA	37746454	38423274	20:37958258:G:T	rs6129261	20	37958258	T	G	0.127862	7.03101e-07	0.748689	FALSE	T	G	-0.0517	0.0091	1.495e-08	1	T	G	0.00132249	0.00219079	0.546072	1	OPPOSITE	Trans-ancestry POAG	Jansen et al., 2019
5:14814883:A:G	rs31916	NA	14751399	14858494	5:14721590:C:T	rs73048831	5	14721590	T	C	0.418592	5.82741e-07	1.8984e-05	FALSE	T	C	0.0074	0.0189	0.6935	1	T	C	0.0136534	0.00436162	0.00174602	1	SAME	European POAG	Jansen et al., 2019
11:47469439:A:G	rs7111873	NA	46482959	48467742	11:47469439:A:G	rs7111873	11	47469439	G	A	0.649329	5.54524e-07	1	FALSE	A	G	0.0735	0.0097	4.362e-14	-1	A	G	-0.00622615	0.00237553	0.00876851	-1	OPPOSITE	Trans-ancestry POAG	Jansen et al., 2019
17:10031183:A:G	rs9913911	NA	10006770	10035562	17:10031183:A:G	rs9913911	17	10031183	G	A	0.561709	3.38296e-07	1	FALSE	A	G	0.139	0.0095	7.256e-49	-1	G	A	-0.00260304	0.00223535	0.244226	1	OPPOSITE	European POAG	Jansen et al., 2019
10:60304864:A:C	rs1649068	NA	60169970	60377014	10:60293320:A:C	rs1649078	10	60293320	C	A	0.46611	3.08051e-07	0.922793	FALSE	A	C	0.0834	0.009	2.8e-20	-1	A	C	0.000119712	0.00229206	0.958346	-1	SAME	European POAG	Jansen et al., 2019
10:60326910:G:A	rs1658436	NA	60169970	60377014	10:60326910:G:A	rs1658436	10	60326910	A	G	0.255765	2.49885e-07	1	FALSE	A	G	-0.0878	0.0091	6.034e-22	1	G	A	0.000929202	0.00216085	0.667183	-1	OPPOSITE	Trans-ancestry POAG	Jansen et al., 2019
17:10031183:A:G	rs9913911	NA	10006770	10035562	17:10029761:G:A	rs68107316	17	10029761	A	G	0.402986	1.3018e-07	0.52084	FALSE	A	G	-0.1043	0.0097	8.699e-27	1	A	G	-0.000710136	0.00217139	0.743636	1	SAME	Trans-ancestry POAG	Jansen et al., 2019
7:28401455:C:G	rs2191828	NA	28366412	28408134	7:28401455:C:G	rs2191828	7	28401455	G	C	0.48545	1.60333e-08	1	FALSE	C	G	0.0792	0.0126	3.743e-10	-1	C	G	0.00088884	0.00365585	0.807906	-1	SAME	Trans-ancestry POAG	Jansen et al., 2019
13:22673870:A:G	rs4769194	NA	22628988	22711688	13:22679011:T:G	rs6490697	13	22679011	G	T	0.478092	1.46211e-08	0.910683	FALSE	T	G	0.0866	0.0108	1.44e-15	-1	T	G	0.000326613	0.00278682	0.906702	-1	SAME	Trans-ancestry POAG	Jansen et al., 2019
13:22679011:T:G	rs6490697	NA	22628988	22711688	13:22683159:A:C	rs4770245	13	22683159	C	A	0.3289	1.00144e-08	0.925677	FALSE	A	C	0.0842	0.0114	1.479e-13	-1	A	C	0.000558803	0.00286246	0.845222	-1	SAME	European POAG	Jansen et al., 2019
11:65337251:A:T	rs1346	NA	64765433	65663547	11:65649984:T:C	rs687672	11	65649984	C	T	0.323215	2.47905e-09	0.141426	FALSE	T	C	-0.0462	0.0107	1.436e-05	-1	T	C	-0.0126798	0.00270382	2.73739e-06	-1	SAME	Trans-ancestry POAG	Jansen et al., 2019
5:14814883:A:G	rs31916	NA	14751399	14858494	5:14762163:C:T	rs28722100	5	14762163	T	C	0.180819	2.04067e-09	0.152551	FALSE	T	C	-0.0501	0.0095	1.252e-07	1	C	T	0.0038757	0.00531713	0.466057	-1	OPPOSITE	Trans-ancestry POAG	Jansen et al., 2019

## Sheet: Supplementary Data 9
trait1	trait2	PMID	Category	ethnicity	note	rg	se	z	p	h2_obs	h2_obs_se	h2_int	h2_int_se	gcov_int	gcov_int_se
POAG	Eye problems/disorders: Glaucoma	0	ukbb	European	SNPs from the MHC (chr6 26M~34M) region was removed for this traits	0.9969	0.0477	20.912	4.17e-97	0.0384	0.0054	1.0198	0.008	0.4146	0.0091
POAG	Non-cancer illness code_ self-reported: glaucoma	0	ukbb	European	SNPs from the MHC (chr6 26M~34M) region was removed for this traits	1.0603	0.0614	17.2699	7.92e-67	0.0109	0.0017	1.0153	0.0081	0.3412	0.0086
POAG	Other eye problems	0	ukbb	European	SNPs from the MHC (chr6 26M~34M) region was removed for this traits	0.4485	0.0635	7.0677	1.58e-12	0.0092	0.0015	1.024	0.0071	0.1008	0.006
POAG	Reason for glasses/contact lenses: For short-sightedness_ i.e. only or mainly for distance viewing such as driving_ cinema etc (called myopia)	0	ukbb	European	SNPs from the MHC (chr6 26M~34M) region was removed for this traits	0.1547	0.0439	3.52	0.0004	0.0254	0.0021	1.1161	0.0085	-0.0448	0.0062
POAG	Systolic blood pressure_ automated reading	0	ukbb	European	SNPs from the MHC (chr6 26M~34M) region was removed for this traits	0.0813	0.025	3.2537	0.0011	0.1274	0.0054	1.0676	0.0152	-0.0082	0.0066
POAG	Seen a psychiatrist for nerves_ anxiety_ tension or depression	0	ukbb	European	SNPs from the MHC (chr6 26M~34M) region was removed for this traits	0.1128	0.0347	3.2494	0.0012	0.0311	0.0021	1.0054	0.008	-0.005	0.005
POAG	Suffer from nerves	0	ukbb	European	SNPs from the MHC (chr6 26M~34M) region was removed for this traits	0.1097	0.0372	2.9507	0.0032	0.0457	0.0032	0.9994	0.0095	-0.0103	0.0064
POAG	Diagnoses - main ICD10: E04 Other non-toxic goitre	0	ukbb	European	SNPs from the MHC (chr6 26M~34M) region was removed for this traits	0.2188	0.0742	2.9494	0.0032	0.0053	0.0013	0.9919	0.0063	-0.0192	0.0052
POAG	Illnesses of father: High blood pressure	0	ukbb	European	SNPs from the MHC (chr6 26M~34M) region was removed for this traits	0.1324	0.0458	2.8908	0.0038	0.0194	0.0017	1.0133	0.0071	-0.0053	0.0055
POAG	Medication for cholesterol_ blood pressure or diabetes: Blood pressure medication	0	ukbb	European	SNPs from the MHC (chr6 26M~34M) region was removed for this traits	0.0885	0.0321	2.7585	0.0058	0.1043	0.0055	1.0321	0.0101	-0.0018	0.0058
POAG	Blood clot_ DVT_ bronchitis_ emphysema_ asthma_ rhinitis_ eczema_ allergy diagnosed by doctor: None of the above	0	ukbb	European	SNPs from the MHC (chr6 26M~34M) region was removed for this traits	-0.0745	0.0271	-2.7515	0.0059	0.0767	0.0062	1.037	0.0162	0.0096	0.0064
POAG	Birth weight	27680694	anthropometric	European	SNPs from the MHC (chr6 26M~34M) region was removed for this traits	-0.0818	0.0297	-2.7501	0.006	0.1029	0.0067	1.0405	0.0096	0.0124	0.0053
POAG	Length of working week for main job	0	ukbb	European	SNPs from the MHC (chr6 26M~34M) region was removed for this traits	0.148	0.0549	2.6956	0.007	0.0194	0.0029	1.0089	0.0066	-0.0105	0.0053
POAG	Non-cancer illness code_ self-reported: hypertension	0	ukbb	European	SNPs from the MHC (chr6 26M~34M) region was removed for this traits	0.0715	0.0273	2.6175	0.0089	0.1144	0.0049	1.0572	0.0171	-0.0071	0.0064
POAG	Vascular/heart problems diagnosed by doctor: High blood pressure	0	ukbb	European	SNPs from the MHC (chr6 26M~34M) region was removed for this traits	0.0707	0.0271	2.6034	0.0092	0.1162	0.0049	1.0616	0.017	-0.0059	0.0065
POAG	Number of self-reported non-cancer illnesses	0	ukbb	European	SNPs from the MHC (chr6 26M~34M) region was removed for this traits	0.0745	0.0288	2.5859	0.0097	0.0612	0.0025	1.0268	0.0101	0.0145	0.0054
POAG	Non-cancer illness code_ self-reported: retinal detachment	0	ukbb	European	SNPs from the MHC (chr6 26M~34M) region was removed for this traits	0.2481	0.0975	2.5437	0.011	0.0033	0.0013	1.0035	0.0066	0.0179	0.0052
POAG	Fasting glucose main effect	22581228	glycemic	European	SNPs from the MHC (chr6 26M~34M) region was removed for this traits	0.1123	0.0445	2.5251	0.0116	0.0984	0.0189	0.9984	0.0093	-0.0087	0.0059
POAG	Blood clot_ DVT_ bronchitis_ emphysema_ asthma_ rhinitis_ eczema_ allergy diagnosed by doctor: Hayfever_ allergic rhinitis or eczema	0	ukbb	European	SNPs from the MHC (chr6 26M~34M) region was removed for this traits	0.069	0.0278	2.482	0.0131	0.0726	0.0054	1.0423	0.0151	-0.013	0.0063
POAG	Frequency of travelling from home to job workplace	0	ukbb	European	SNPs from the MHC (chr6 26M~34M) region was removed for this traits	0.1089	0.0439	2.479	0.0132	0.0217	0.0027	1.0178	0.0068	-0.0048	0.0051
POAG	Tinnitus: Yes_ now some of the time	0	ukbb	European	SNPs from the MHC (chr6 26M~34M) region was removed for this traits	-0.2797	0.114	-2.4531	0.0142	0.0088	0.004	0.9993	0.0062	0.0116	0.0053
POAG	Non-cancer illness code_ self-reported: hayfever/allergic rhinitis	0	ukbb	European	SNPs from the MHC (chr6 26M~34M) region was removed for this traits	0.0964	0.0396	2.4327	0.015	0.023	0.0024	1.0182	0.0083	-0.015	0.006
POAG	Mean diameter for HDL particles	27005778	metabolites	European	SNPs from the MHC (chr6 26M~34M) region was removed for this traits	0.1442	0.0597	2.4132	0.0158	0.1218	0.0295	1.0081	0.0187	-0.0068	0.0044
POAG	Phospholipids in very large HDL	27005778	metabolites	European	SNPs from the MHC (chr6 26M~34M) region was removed for this traits	0.1737	0.0727	2.3892	0.0169	0.0925	0.0296	1.0079	0.0166	-0.0087	0.0046
POAG	Nervous feelings	0	ukbb	European	SNPs from the MHC (chr6 26M~34M) region was removed for this traits	0.0803	0.0339	2.366	0.018	0.0662	0.0039	1.0141	0.0123	-0.0026	0.0066
POAG	Illnesses of siblings: Stroke	0	ukbb	European	SNPs from the MHC (chr6 26M~34M) region was removed for this traits	0.2327	0.1003	2.3203	0.0203	0.0043	0.0017	1.0077	0.0063	-0.0049	0.0055
POAG	Diagnoses - main ICD10: H26 Other cataract	0	ukbb	European	SNPs from the MHC (chr6 26M~34M) region was removed for this traits	0.127	0.0549	2.3122	0.0208	0.0095	0.0017	0.9932	0.0073	0.0364	0.0055
POAG	Mineral and other dietary supplements: Fish oil (including cod liver oil)	0	ukbb	European	SNPs from the MHC (chr6 26M~34M) region was removed for this traits	0.088	0.0381	2.3089	0.021	0.027	0.0019	1.0056	0.0069	-0.0134	0.0056
POAG	Illnesses of siblings: Severe depression	0	ukbb	European	SNPs from the MHC (chr6 26M~34M) region was removed for this traits	0.1116	0.0484	2.3045	0.0212	0.0142	0.0019	1.0044	0.0067	-0.0058	0.0049
POAG	Taking other prescription medications	0	ukbb	European	SNPs from the MHC (chr6 26M~34M) region was removed for this traits	0.0714	0.0315	2.2651	0.0235	0.0433	0.0023	1.016	0.0085	0.0339	0.0058
POAG	Diagnoses - main ICD10: N32 Other disorders of bladder	0	ukbb	European	SNPs from the MHC (chr6 26M~34M) region was removed for this traits	0.1803	0.0796	2.265	0.0235	0.0041	0.0012	0.989	0.006	-0.0003	0.0045
POAG	Adiponectin	22479202	cardiometabolic	Mixed	Caution: using this data may yield less robust results due to minor departure of the LD structure; SNPs from the MHC (chr6 26M~34M) region was removed for this traits	0.1417	0.0626	2.2617	0.0237	0.1198	0.0256	1.0222	0.0122	-0.0007	0.0062
POAG	Average weekly beer plus cider intake	0	ukbb	European	SNPs from the MHC (chr6 26M~34M) region was removed for this traits	-0.0818	0.0362	-2.2575	0.024	0.0515	0.0035	1.0628	0.0094	0.002	0.0058
POAG	Non-cancer illness code_ self-reported: hypothyroidism/myxoedema	0	ukbb	European	SNPs from the MHC (chr6 26M~34M) region was removed for this traits	-0.0778	0.0346	-2.2516	0.0243	0.0509	0.0058	1.0326	0.0147	0.0111	0.0068
POAG	Diagnoses - main ICD10: H25 Senile cataract	0	ukbb	European	SNPs from the MHC (chr6 26M~34M) region was removed for this traits	0.2043	0.0911	2.2413	0.025	0.0034	0.0014	1.0127	0.0071	0.0199	0.0053
POAG	Diagnoses - main ICD10: R55 Syncope and collapse	0	ukbb	European	SNPs from the MHC (chr6 26M~34M) region was removed for this traits	0.1555	0.0697	2.2313	0.0257	0.0054	0.0014	1.0082	0.007	-0.0106	0.0052
POAG	Number of treatments/medications taken	0	ukbb	European	SNPs from the MHC (chr6 26M~34M) region was removed for this traits	0.0613	0.0277	2.2172	0.0266	0.0605	0.0026	1.0321	0.009	0.0311	0.0054
POAG	Non-cancer illness code_ self-reported: hyperthyroidism/thyrotoxicosis	0	ukbb	European	SNPs from the MHC (chr6 26M~34M) region was removed for this traits	-0.1226	0.0553	-2.2174	0.0266	0.009	0.0026	1.0046	0.0077	0.0084	0.0053
POAG	Cholesterol esters in large HDL	27005778	metabolites	European	SNPs from the MHC (chr6 26M~34M) region was removed for this traits	0.1366	0.0619	2.2076	0.0273	0.126	0.0308	1.0004	0.0141	-0.0051	0.0048
POAG	Blood clot_ DVT_ bronchitis_ emphysema_ asthma_ rhinitis_ eczema_ allergy diagnosed by doctor: Asthma	0	ukbb	European	SNPs from the MHC (chr6 26M~34M) region was removed for this traits	0.062	0.0282	2.1945	0.0282	0.0574	0.0055	1.0259	0.0143	-0.0088	0.0058
POAG	Most recent bowel cancer screening	0	ukbb	European	SNPs from the MHC (chr6 26M~34M) region was removed for this traits	0.2388	0.109	2.1913	0.0284	0.0118	0.0057	1.0115	0.0058	0.0077	0.0051
POAG	Free cholesterol in large HDL	27005778	metabolites	European	SNPs from the MHC (chr6 26M~34M) region was removed for this traits	0.1352	0.0619	2.1855	0.0288	0.1073	0.0287	1.0083	0.014	-0.0064	0.0048
POAG	Total lipids in large HDL	27005778	metabolites	European	SNPs from the MHC (chr6 26M~34M) region was removed for this traits	0.1303	0.0597	2.183	0.029	0.1325	0.0307	1.0006	0.0148	-0.0057	0.0048
POAG	Doctor diagnosed hayfever or allergic rhinitis	0	ukbb	European	SNPs from the MHC (chr6 26M~34M) region was removed for this traits	0.0876	0.0402	2.1758	0.0296	0.0784	0.0091	1.0091	0.0081	-0.0092	0.0051
POAG	Phospholipids in large HDL	27005778	metabolites	European	SNPs from the MHC (chr6 26M~34M) region was removed for this traits	0.1323	0.0609	2.1719	0.0299	0.1285	0.0301	0.9985	0.014	-0.0064	0.0049
POAG	Non-cancer illness code_ self-reported: asthma	0	ukbb	European	SNPs from the MHC (chr6 26M~34M) region was removed for this traits	0.0618	0.0285	2.1701	0.03	0.058	0.0056	1.027	0.0145	-0.0091	0.0059
POAG	Vascular/heart problems diagnosed by doctor: None of the above	0	ukbb	European	SNPs from the MHC (chr6 26M~34M) region was removed for this traits	-0.0585	0.0272	-2.1519	0.0314	0.1132	0.0046	1.0601	0.0158	0.0019	0.0065
POAG	Concentration of large HDL particles	27005778	metabolites	European	SNPs from the MHC (chr6 26M~34M) region was removed for this traits	0.1275	0.0594	2.1455	0.0319	0.1343	0.0306	0.9995	0.015	-0.0059	0.0048
POAG	Illnesses of mother: High blood pressure	0	ukbb	European	SNPs from the MHC (chr6 26M~34M) region was removed for this traits	0.0853	0.0398	2.1448	0.032	0.0295	0.0022	1.0178	0.0085	-0.0069	0.006
POAG	Why stopped smoking: None of the above	0	ukbb	European	SNPs from the MHC (chr6 26M~34M) region was removed for this traits	-0.1089	0.0513	-2.1211	0.0339	0.0401	0.0058	0.9977	0.0066	0.0056	0.005
POAG	Transport type for commuting to job workplace: Walk	0	ukbb	European	SNPs from the MHC (chr6 26M~34M) region was removed for this traits	0.1121	0.0534	2.0996	0.0358	0.0166	0.0026	1.0036	0.0061	-0.0049	0.0052
POAG	Diagnoses - main ICD10: M54 Dorsalgia	0	ukbb	European	SNPs from the MHC (chr6 26M~34M) region was removed for this traits	0.124	0.0592	2.096	0.0361	0.0101	0.0015	1.0042	0.0073	-0.0025	0.0054
POAG	Forced expiratory volume in 1 second	0	lung_function	European	SNPs from the MHC (chr6 26M~34M) region was removed for this traits	-0.0442	0.0212	-2.0827	0.0373	0.1656	0.0062	0.9853	0.0137	-0.0003	0.0064
POAG	Work/job satisfaction	0	ukbb	European	SNPs from the MHC (chr6 26M~34M) region was removed for this traits	0.104	0.0503	2.0675	0.0387	0.049	0.0067	0.9941	0.0066	-0.0035	0.0051
POAG	Forced Vital capacity(FVC)	28166213	lung_function	European	SNPs from the MHC (chr6 26M~34M) region was removed for this traits	-0.0709	0.0344	-2.0636	0.0391	0.2603	0.0159	0.976	0.0067	0.0016	0.0058
POAG	Mineral and other dietary supplements: None of the above	0	ukbb	European	SNPs from the MHC (chr6 26M~34M) region was removed for this traits	-0.077	0.038	-2.0263	0.0427	0.0301	0.002	1.0095	0.0067	0.0097	0.0055
POAG	Forced vital capacity	0	lung_function	European	SNPs from the MHC (chr6 26M~34M) region was removed for this traits	-0.043	0.0213	-2.0242	0.0429	0.1747	0.0062	0.9577	0.0125	-0.0006	0.0061
POAG	Urinary albumin-to-creatinine ratio (non-diabetes)	26631737	kidney	European	SNPs from the MHC (chr6 26M~34M) region was removed for this traits	0.1298	0.0642	2.0199	0.0434	0.0532	0.0107	0.9951	0.0074	-0.004	0.0058
POAG	Pulse wave reflection index	0	ukbb	European	SNPs from the MHC (chr6 26M~34M) region was removed for this traits	-0.0957	0.0475	-2.0168	0.0437	0.0548	0.0052	1.0079	0.0073	-0.0068	0.0063
POAG	Body mass index	20935630	anthropometric	European	SNPs from the MHC (chr6 26M~34M) region was removed for this traits	-0.0574	0.0285	-2.0151	0.0439	0.1896	0.0096	1.0103	0.0106	0.0038	0.0067
POAG	Free cholesterol in very large HDL	27005778	metabolites	European	Caution: using this data may yield results outside bounds due to relative low Z score of the SNP heritability of the trait; SNPs from the MHC (chr6 26M~34M) region was removed for this traits	0.2132	0.1065	2.0024	0.0452	0.0487	0.025	1.0142	0.0136	-0.0103	0.0047
POAG	Diagnoses - main ICD10: I30 Acute pericarditis	0	ukbb	European	SNPs from the MHC (chr6 26M~34M) region was removed for this traits	-0.2485	0.1241	-2.0025	0.0452	0.0023	0.0014	0.9947	0.0068	0.0055	0.0057
POAG	Forced vital capacity	0	lung_function	European	SNPs from the MHC (chr6 26M~34M) region was removed for this traits	-0.0412	0.0207	-1.9928	0.0463	0.1614	0.0057	0.9909	0.0139	1.01e-05	0.0063
POAG	Diagnoses - main ICD10: M24 Other specific joint derangements	0	ukbb	European	SNPs from the MHC (chr6 26M~34M) region was removed for this traits	-0.1846	0.0934	-1.9768	0.0481	0.0035	0.0013	0.9878	0.0063	0.0083	0.0049
POAG	Total cholesterol in large HDL	27005778	metabolites	European	SNPs from the MHC (chr6 26M~34M) region was removed for this traits	0.1208	0.0617	1.9597	0.05	0.1066	0.0282	1.0064	0.0143	-0.0052	0.0047
POAG	Medication for cholesterol_ blood pressure or diabetes: Insulin	0	ukbb	European	SNPs from the MHC (chr6 26M~34M) region was removed for this traits	0.1775	0.0911	1.9484	0.0514	0.0096	0.0033	1.0112	0.0071	0.0055	0.0052
POAG	Creatinine (enzymatic) in urine	0	ukbb	European	SNPs from the MHC (chr6 26M~34M) region was removed for this traits	-0.0551	0.0285	-1.9317	0.0534	0.0661	0.0029	1.019	0.0088	0.0153	0.0062
POAG	Concentration of very large HDL particles	27005778	metabolites	European	Caution: using this data may yield results outside bounds due to relative low Z score of the SNP heritability of the trait; SNPs from the MHC (chr6 26M~34M) region was removed for this traits	0.1743	0.0903	1.9309	0.0535	0.0654	0.0266	1.0021	0.0148	-0.0077	0.0047
POAG	Medication for cholesterol_ blood pressure or diabetes: None of the above	0	ukbb	European	SNPs from the MHC (chr6 26M~34M) region was removed for this traits	-0.0668	0.0346	-1.9277	0.0539	0.0887	0.0051	1.0329	0.0101	0.0017	0.0057
POAG	Time spent watching television (TV)	0	ukbb	European	SNPs from the MHC (chr6 26M~34M) region was removed for this traits	-0.0496	0.0258	-1.9235	0.0544	0.0992	0.004	1.0568	0.0109	0.0101	0.0062
POAG	Smoking Cessation	30617275	smoking_behaviour	European	Caution: using this data may yield results outside bounds due to relative low Z score of the SNP heritability of the trait; SNPs from the MHC (chr6 26M~34M) region was removed for this traits	-0.2258	0.1182	-1.9104	0.0561	0.0071	0.0023	0.9988	0.0152	0.0293	0.0129
POAG	Forced expiratory volume in 1 second (FEV1)	28166213	lung_function	European	SNPs from the MHC (chr6 26M~34M) region was removed for this traits	-0.0668	0.035	-1.9073	0.0565	0.265	0.0169	0.9703	0.0066	0.0012	0.0056
POAG	Diagnoses - main ICD10: N40 Hyperplasia of prostate	0	ukbb	European	SNPs from the MHC (chr6 26M~34M) region was removed for this traits	0.1405	0.0741	1.8962	0.0579	0.0059	0.0015	1.01	0.0067	0.0022	0.0056
POAG	Forced expiratory volume in 1 second	0	lung_function	European	SNPs from the MHC (chr6 26M~34M) region was removed for this traits	-0.0422	0.0223	-1.8927	0.0584	0.1774	0.0067	0.9521	0.0123	-0.0029	0.0063
POAG	Total lipids in very large HDL	27005778	metabolites	European	Caution: using this data may yield results outside bounds due to relative low Z score of the SNP heritability of the trait; SNPs from the MHC (chr6 26M~34M) region was removed for this traits	0.183	0.0972	1.8822	0.0598	0.0597	0.0274	1.0165	0.0147	-0.0085	0.0046
POAG	Number of incorrect matches in round	0	ukbb	European	SNPs from the MHC (chr6 26M~34M) region was removed for this traits	0.0527	0.0281	1.8726	0.0611	0.0546	0.0027	1.0044	0.009	-0.0044	0.0056
POAG	Underlying (primary) cause of death: ICD10: J84.1 Other interstitial pulmonary diseases with fibrosis	0	ukbb	European	SNPs from the MHC (chr6 26M~34M) region was removed for this traits	-0.2477	0.1326	-1.868	0.0618	0.0939	0.0646	0.9943	0.007	0.0062	0.0057
POAG	Ever taken oral contraceptive pill	0	ukbb	European	SNPs from the MHC (chr6 26M~34M) region was removed for this traits	-0.096	0.0515	-1.865	0.0622	0.0195	0.0028	1.0114	0.0069	-0.001	0.0049
POAG	Age at Menopause	26414677	reproductive	European	SNPs from the MHC (chr6 26M~34M) region was removed for this traits	0.0642	0.0347	1.8531	0.0639	0.1363	0.016	0.989	0.0138	-0.01	0.0057
POAG	Types of transport used (excluding work): Cycle	0	ukbb	European	SNPs from the MHC (chr6 26M~34M) region was removed for this traits	0.0685	0.0374	1.8329	0.0668	0.0247	0.0018	1.0258	0.0069	-0.0102	0.006
POAG	Illnesses of mother: Chronic bronchitis/emphysema	0	ukbb	European	SNPs from the MHC (chr6 26M~34M) region was removed for this traits	-0.1008	0.0557	-1.81	0.0703	0.0128	0.0019	1.0039	0.0066	0.0083	0.0054
POAG	Vitamin and mineral supplements: Vitamin E	0	ukbb	European	SNPs from the MHC (chr6 26M~34M) region was removed for this traits	0.1137	0.0631	1.8005	0.0718	0.0066	0.0014	0.9952	0.0064	-0.0066	0.0052
POAG	Drive faster than motorway speed limit	0	ukbb	European	SNPs from the MHC (chr6 26M~34M) region was removed for this traits	-0.0592	0.0331	-1.7884	0.0737	0.0566	0.0029	1.0297	0.0091	-0.0133	0.0067
POAG	Ever stopped smoking for 6+ months	0	ukbb	European	SNPs from the MHC (chr6 26M~34M) region was removed for this traits	-0.1466	0.0821	-1.7855	0.0742	0.02	0.0054	1.0005	0.0066	0.0019	0.0052
POAG	Ever used hormone-replacement therapy (HRT)	0	ukbb	European	SNPs from the MHC (chr6 26M~34M) region was removed for this traits	-0.0645	0.0362	-1.783	0.0746	0.0406	0.0032	0.9997	0.007	0.0114	0.0053
POAG	Sleep duration	0	ukbb	European	SNPs from the MHC (chr6 26M~34M) region was removed for this traits	0.0556	0.0314	1.7707	0.0766	0.0713	0.0037	1.0239	0.0102	-0.0032	0.0062
POAG	Non-cancer illness code_ self-reported: chronic obstructive airways disease/copd	0	ukbb	European	SNPs from the MHC (chr6 26M~34M) region was removed for this traits	0.1213	0.0687	1.7656	0.0775	0.006	0.0015	0.9924	0.007	-0.0042	0.005
POAG	Diagnoses - main ICD10: J44 Other chronic obstructive pulmonary disease	0	ukbb	European	SNPs from the MHC (chr6 26M~34M) region was removed for this traits	0.1522	0.0863	1.7631	0.0779	0.0046	0.0014	0.996	0.0067	-0.0034	0.0054
POAG	Illnesses of mother: Alzheimers disease/dementia	0	ukbb	European	SNPs from the MHC (chr6 26M~34M) region was removed for this traits	0.2097	0.1196	1.7528	0.0796	0.0041	0.0045	1.0334	0.034	-0.0098	0.0058
POAG	Worrier / anxious feelings	0	ukbb	European	SNPs from the MHC (chr6 26M~34M) region was removed for this traits	0.0555	0.0319	1.7408	0.0817	0.0795	0.005	1.0011	0.0121	-0.0034	0.0069
POAG	Platelet count	22139419	haemotological	European	SNPs from the MHC (chr6 26M~34M) region was removed for this traits	0.0667	0.0385	1.7323	0.0832	0.121	0.0115	0.9839	0.0081	-0.0055	0.0053
POAG	Obesity class 1	23563607	anthropometric	European	SNPs from the MHC (chr6 26M~34M) region was removed for this traits	-0.0511	0.0296	-1.7251	0.0845	0.217	0.0115	1.0182	0.0111	0.0023	0.0067
POAG	Diagnoses - main ICD10: M23 Internal derangement of knee	0	ukbb	European	SNPs from the MHC (chr6 26M~34M) region was removed for this traits	0.1014	0.059	1.7185	0.0857	0.008	0.0018	1.005	0.0072	-0.0057	0.0051
POAG	Vitamin and mineral supplements: Vitamin B	0	ukbb	European	SNPs from the MHC (chr6 26M~34M) region was removed for this traits	0.0979	0.0571	1.7141	0.0865	0.0074	0.0015	0.9996	0.0067	-0.0067	0.0046
POAG	Diagnoses - main ICD10: K21 Gastro-oesophageal reflux disease	0	ukbb	European	SNPs from the MHC (chr6 26M~34M) region was removed for this traits	-0.1292	0.0754	-1.7123	0.0868	0.0064	0.0013	1.0025	0.0058	0.0069	0.0054
POAG	Forced expiratory volume in 1-second (FEV1)_ predicted percentage	0	ukbb	European	SNPs from the MHC (chr6 26M~34M) region was removed for this traits	-0.0531	0.0313	-1.6981	0.0895	0.2017	0.0099	1.0337	0.0097	0.0016	0.0065
POAG	Mean diameter for VLDL particles	27005778	metabolites	European	SNPs from the MHC (chr6 26M~34M) region was removed for this traits	-0.1019	0.0602	-1.694	0.0903	0.1343	0.0342	0.9902	0.0084	-0.0016	0.0048
POAG	HDL cholesterol	20686565	lipids	European	SNPs from the MHC (chr6 26M~34M) region was removed for this traits	0.0565	0.0336	1.6839	0.0922	0.127	0.0229	1.0584	0.0494	-0.0078	0.006
POAG	Medication for cholesterol_ blood pressure or diabetes: Cholesterol lowering medication	0	ukbb	European	SNPs from the MHC (chr6 26M~34M) region was removed for this traits	0.0629	0.0374	1.6812	0.0927	0.0683	0.0064	1.0329	0.0142	-0.005	0.0049
POAG	Long-standing illness_ disability or infirmity	0	ukbb	European	SNPs from the MHC (chr6 26M~34M) region was removed for this traits	0.0501	0.0302	1.661	0.0967	0.0501	0.0024	1.0267	0.0086	0.0219	0.0052
POAG	Knee pain for 3+ months	0	ukbb	European	SNPs from the MHC (chr6 26M~34M) region was removed for this traits	0.1159	0.0698	1.6603	0.0968	0.0267	0.0068	1	0.0065	-0.0024	0.005
POAG	Illness_ injury_ bereavement_ stress in last 2 years: Serious illness_ injury or assault of a close relative	0	ukbb	European	SNPs from the MHC (chr6 26M~34M) region was removed for this traits	0.101	0.061	1.6556	0.0978	0.011	0.0017	1.0113	0.007	-0.0106	0.0055
POAG	Mean time to correctly identify matches	0	ukbb	European	SNPs from the MHC (chr6 26M~34M) region was removed for this traits	-0.0462	0.0281	-1.6419	0.1006	0.0732	0.003	1.0312	0.0095	0.0074	0.0058
POAG	Ulcerative colitis	26192919	autoimmune	European	SNPs from the MHC (chr6 26M~34M) region was removed for this traits	-0.0637	0.0388	-1.6411	0.1008	0.2612	0.0319	1.0456	0.0094	0.0133	0.0051
POAG	Height; Females at age 10 and males at age 12	23449627	anthropometric	European	SNPs from the MHC (chr6 26M~34M) region was removed for this traits	0.0731	0.0448	1.6324	0.1026	0.4323	0.048	0.9522	0.0079	-0.0063	0.0062
POAG	Non-cancer illness code_ self-reported: muscle or soft tissue injuries	0	ukbb	European	SNPs from the MHC (chr6 26M~34M) region was removed for this traits	0.203	0.1246	1.6296	0.1032	0.0024	0.0014	1.0002	0.0071	-0.0101	0.0051
POAG	22:6 docosahexaenoic acid	27005778	metabolites	European	SNPs from the MHC (chr6 26M~34M) region was removed for this traits	0.1174	0.0721	1.6279	0.1035	0.1299	0.0375	0.996	0.0072	-0.0064	0.0052
POAG	Frequency of tiredness / lethargy in last 2 weeks	0	ukbb	European	SNPs from the MHC (chr6 26M~34M) region was removed for this traits	0.0479	0.0295	1.6249	0.1042	0.06	0.0029	1.0245	0.0096	0.0017	0.006
POAG	Omega-3 fatty acids	27005778	metabolites	European	SNPs from the MHC (chr6 26M~34M) region was removed for this traits	0.1092	0.0675	1.6174	0.1058	0.1544	0.0411	0.9911	0.0077	-0.0047	0.0051
POAG	Number of pregnancy terminations	0	ukbb	European	SNPs from the MHC (chr6 26M~34M) region was removed for this traits	-0.087	0.054	-1.611	0.1072	0.0596	0.01	1.008	0.0075	-0.0011	0.0051
POAG	Eye problems/disorders: Cataract	0	ukbb	European	SNPs from the MHC (chr6 26M~34M) region was removed for this traits	0.0972	0.0607	1.601	0.1094	0.0233	0.0043	1.0133	0.0068	0.0587	0.005
POAG	Forced expiratory volume in 1 second (FEV1)/Forced Vital capacity(FVC)	21946350	lung_function	European	SNPs from the MHC (chr6 26M~34M) region was removed for this traits	-0.0721	0.0456	-1.579	0.1143	0.1236	0.0134	0.9285	0.0078	0.0026	0.0064
POAG	Illnesses of mother: None of the above (group 2)	0	ukbb	European	SNPs from the MHC (chr6 26M~34M) region was removed for this traits	-0.0989	0.0632	-1.566	0.1174	0.0092	0.0018	1.001	0.0066	0.006	0.0054
POAG	Diagnoses - main ICD10: G56 Mononeuropathies of upper limb	0	ukbb	European	SNPs from the MHC (chr6 26M~34M) region was removed for this traits	-0.0714	0.0458	-1.559	0.119	0.0138	0.0018	1.0091	0.0072	0.0049	0.005
POAG	Ever vs never smoked	20418890	smoking_behaviour	European	SNPs from the MHC (chr6 26M~34M) region was removed for this traits	-0.0636	0.0408	-1.5561	0.1197	0.0755	0.0065	0.9962	0.0059	0.0029	0.005
POAG	Total cholesterol in HDL	27005778	metabolites	European	SNPs from the MHC (chr6 26M~34M) region was removed for this traits	0.1064	0.0687	1.5475	0.1218	0.0942	0.0281	1.0067	0.0126	-0.0068	0.0048
POAG	Overweight	23563607	anthropometric	European	SNPs from the MHC (chr6 26M~34M) region was removed for this traits	-0.0513	0.0333	-1.5419	0.1231	0.1095	0.0064	1.0246	0.0095	0.0039	0.0063
POAG	Illnesses of father: Prostate cancer	0	ukbb	European	SNPs from the MHC (chr6 26M~34M) region was removed for this traits	0.1001	0.0653	1.5336	0.1251	0.0085	0.0018	1.0121	0.0078	-0.0008	0.0051
POAG	Chest pain or discomfort walking normally	0	ukbb	European	SNPs from the MHC (chr6 26M~34M) region was removed for this traits	0.0733	0.048	1.5285	0.1264	0.0753	0.0092	1.0081	0.0071	0.0063	0.005
POAG	Number of children ever born	27798627	reproductive	European	SNPs from the MHC (chr6 26M~34M) region was removed for this traits	-0.061	0.0402	-1.5187	0.1288	0.0257	0.0018	0.97	0.0072	0.0003	0.0053
POAG	Birth weight	0	ukbb	European	SNPs from the MHC (chr6 26M~34M) region was removed for this traits	-0.04	0.0265	-1.5081	0.1315	0.1085	0.006	1.0507	0.0136	0.0035	0.0056
POAG	Triglycerides in very large HDL	27005778	metabolites	European	Caution: using this data may yield results outside bounds due to relative low Z score of the SNP heritability of the trait; SNPs from the MHC (chr6 26M~34M) region was removed for this traits	0.1069	0.0709	1.5071	0.1318	0.0824	0.0255	1.0158	0.0274	-0.0107	0.0045
POAG	Sleep duration	27494321	sleeping	European	SNPs from the MHC (chr6 26M~34M) region was removed for this traits	0.069	0.0462	1.4916	0.1358	0.0557	0.0049	1.019	0.0071	-0.0086	0.0054
POAG	Number of older siblings	0	ukbb	European	SNPs from the MHC (chr6 26M~34M) region was removed for this traits	0.2424	0.1632	1.4852	0.1375	0.0059	0.0051	1.007	0.0061	-0.011	0.0054
POAG	Mean Pallidum	25607358	brain_volume	European	SNPs from the MHC (chr6 26M~34M) region was removed for this traits	0.1037	0.0698	1.4846	0.1377	0.162	0.0411	0.9775	0.0069	-0.0101	0.0051
POAG	Chronotype	27494321	sleeping	European	SNPs from the MHC (chr6 26M~34M) region was removed for this traits	0.043	0.0292	1.4707	0.1414	0.1017	0.0058	1.0133	0.0075	-0.0051	0.0052
POAG	Types of transport used (excluding work): Walk	0	ukbb	European	SNPs from the MHC (chr6 26M~34M) region was removed for this traits	0.0555	0.0379	1.4652	0.1429	0.0331	0.0023	1.0349	0.0086	0.0019	0.0062
POAG	Fractured bone site(s): Ankle	0	ukbb	European	SNPs from the MHC (chr6 26M~34M) region was removed for this traits	-0.087	0.0597	-1.4567	0.1452	0.0065	0.0016	0.9949	0.0065	0.011	0.0045
POAG	Number of depression episodes	0	ukbb	European	SNPs from the MHC (chr6 26M~34M) region was removed for this traits	0.1508	0.1037	1.4539	0.146	0.0319	0.0121	1.0048	0.0063	-0.0015	0.0057
POAG	Types of transport used (excluding work): Car/motor vehicle	0	ukbb	European	SNPs from the MHC (chr6 26M~34M) region was removed for this traits	-0.0562	0.0388	-1.4496	0.1472	0.0244	0.0017	1.0093	0.007	0.0007	0.0057
POAG	Non-cancer illness code_ self-reported: vaginal prolapse/uterine prolapse	0	ukbb	European	SNPs from the MHC (chr6 26M~34M) region was removed for this traits	-0.1241	0.0864	-1.4361	0.151	0.0048	0.0015	1.0056	0.0067	0.0077	0.0055
POAG	Vitamin and mineral supplements: Vitamin D	0	ukbb	European	SNPs from the MHC (chr6 26M~34M) region was removed for this traits	0.0955	0.0666	1.4348	0.1513	0.006	0.0016	0.9979	0.0073	-0.0072	0.0054
POAG	Diastolic blood pressure_ automated reading	0	ukbb	European	SNPs from the MHC (chr6 26M~34M) region was removed for this traits	0.0369	0.0259	1.425	0.1542	0.1362	0.0058	1.065	0.0155	-0.0052	0.007
POAG	Neuroticism score	0	ukbb	European	SNPs from the MHC (chr6 26M~34M) region was removed for this traits	0.0395	0.0278	1.422	0.155	0.1184	0.0062	1.0177	0.0134	-0.0021	0.0068
POAG	Diagnoses - main ICD10: N19 Unspecified renal failure	0	ukbb	European	SNPs from the MHC (chr6 26M~34M) region was removed for this traits	-0.1397	0.0984	-1.4194	0.1558	0.003	0.0014	0.999	0.0067	0.0051	0.0049
POAG	Triglycerides in medium VLDL	27005778	metabolites	European	SNPs from the MHC (chr6 26M~34M) region was removed for this traits	-0.0946	0.0667	-1.4176	0.1563	0.0968	0.0303	0.9988	0.0065	-0.001	0.0049
POAG	Tense / highly strung	0	ukbb	European	SNPs from the MHC (chr6 26M~34M) region was removed for this traits	0.0463	0.0328	1.4148	0.1571	0.0572	0.0032	0.9955	0.0097	-0.0071	0.0063
POAG	Morning/evening person (chronotype)	0	ukbb	European	SNPs from the MHC (chr6 26M~34M) region was removed for this traits	-0.0318	0.0225	-1.412	0.1579	0.1162	0.0043	1.0407	0.0113	-0.0072	0.0062
POAG	Total cholesterol in very large HDL	27005778	metabolites	European	Caution: using this data may yield results outside bounds due to relative low Z score of the SNP heritability of the trait; SNPs from the MHC (chr6 26M~34M) region was removed for this traits	0.1843	0.1319	1.3972	0.1624	0.0331	0.0226	1.0133	0.0115	-0.0088	0.0047
POAG	Diagnoses - main ICD10: D25 Leiomyoma of uterus	0	ukbb	European	SNPs from the MHC (chr6 26M~34M) region was removed for this traits	0.0898	0.0643	1.3961	0.1627	0.0059	0.0014	0.9932	0.006	-0.0095	0.0048
POAG	Difficulty not smoking for 1 day	0	ukbb	European	SNPs from the MHC (chr6 26M~34M) region was removed for this traits	0.0923	0.0663	1.3929	0.1637	0.1116	0.0218	0.9893	0.0064	-0.0025	0.005
POAG	Triglycerides	20686565	lipids	European	SNPs from the MHC (chr6 26M~34M) region was removed for this traits	-0.0455	0.0327	-1.3924	0.1638	0.1675	0.0286	0.9685	0.0162	0.0006	0.0065
POAG	Vitamin and mineral supplements: None of the above	0	ukbb	European	SNPs from the MHC (chr6 26M~34M) region was removed for this traits	-0.0496	0.0359	-1.3844	0.1662	0.0301	0.0018	0.9942	0.0068	0.007	0.0049
POAG	Current employment status: In paid employment or self-employed	0	ukbb	European	SNPs from the MHC (chr6 26M~34M) region was removed for this traits	-0.0876	0.0638	-1.3735	0.1696	0.0081	0.0015	1.0188	0.0067	-0.0066	0.0052
POAG	Concentration of medium VLDL particles	27005778	metabolites	European	SNPs from the MHC (chr6 26M~34M) region was removed for this traits	-0.0781	0.0572	-1.366	0.1719	0.1487	0.035	0.9809	0.0067	-0.0031	0.0048
POAG	Age completed full time education	0	ukbb	European	SNPs from the MHC (chr6 26M~34M) region was removed for this traits	-0.0363	0.0266	-1.3651	0.1722	0.0846	0.0044	1.0625	0.0094	0.0076	0.0057
POAG	Infant head circumference	22504419	anthropometric	European	SNPs from the MHC (chr6 26M~34M) region was removed for this traits	-0.1006	0.0737	-1.365	0.1723	0.2331	0.0446	0.9901	0.0067	0.0002	0.0059
POAG	Illnesses of father: None of the above (group 1)	0	ukbb	European	SNPs from the MHC (chr6 26M~34M) region was removed for this traits	-0.0793	0.0581	-1.3635	0.1727	0.0148	0.0018	1.0227	0.0069	0.0057	0.0058
POAG	Glucose	27005778	metabolites	European	SNPs from the MHC (chr6 26M~34M) region was removed for this traits	0.1002	0.074	1.3537	0.1758	0.0888	0.0212	0.9947	0.0064	-0.0011	0.0054
POAG	Mono-unsaturated fatty acids	27005778	metabolites	European	Caution: using this data may yield results outside bounds due to relative low Z score of the SNP heritability of the trait; SNPs from the MHC (chr6 26M~34M) region was removed for this traits	0.1137	0.0843	1.3489	0.1774	0.1058	0.0423	0.9881	0.008	-0.0095	0.0047
POAG	Diagnoses - main ICD10: D12 Benign neoplasm of colon_ rectum_ anus and anal canal	0	ukbb	European	SNPs from the MHC (chr6 26M~34M) region was removed for this traits	-0.0708	0.0526	-1.3463	0.1782	0.0086	0.0014	1.0039	0.0064	0.01	0.005
POAG	Impedance of arm (left)	0	ukbb	European	SNPs from the MHC (chr6 26M~34M) region was removed for this traits	0.0326	0.0243	1.3404	0.1801	0.233	0.0081	1.0973	0.0213	-0.006	0.0085
POAG	Vitamin and mineral supplements: Vitamin C	0	ukbb	European	SNPs from the MHC (chr6 26M~34M) region was removed for this traits	0.0633	0.0473	1.34	0.1802	0.0132	0.0017	0.999	0.0074	0.0003	0.0051
POAG	Forced expiratory volume in 1-second (FEV1)_ Best measure	0	ukbb	European	SNPs from the MHC (chr6 26M~34M) region was removed for this traits	-0.0351	0.0263	-1.3371	0.1812	0.1627	0.0071	1.057	0.0136	-0.0039	0.0072
POAG	Wears glasses or contact lenses	0	ukbb	European	SNPs from the MHC (chr6 26M~34M) region was removed for this traits	0.0573	0.0429	1.3337	0.1823	0.0161	0.0017	1.0012	0.0077	0.013	0.0051
POAG	Non-cancer illness code_ self-reported: gastro-oesophageal reflux (gord) / gastric reflux	0	ukbb	European	SNPs from the MHC (chr6 26M~34M) region was removed for this traits	0.0655	0.0491	1.3336	0.1823	0.0115	0.0016	1.014	0.0072	-0.0071	0.0053
POAG	Omega-9 and saturated fatty acids	27005778	metabolites	European	Caution: using this data may yield results outside bounds due to relative low Z score of the SNP heritability of the trait; SNPs from the MHC (chr6 26M~34M) region was removed for this traits	0.1214	0.0929	1.3061	0.1915	0.0875	0.0434	0.996	0.008	-0.0083	0.0048
POAG	Diagnoses - main ICD10: C61 Malignant neoplasm of prostate	0	ukbb	European	SNPs from the MHC (chr6 26M~34M) region was removed for this traits	-0.096	0.0744	-1.2906	0.1969	0.0042	0.0015	1.0193	0.0069	0.0103	0.0045
POAG	Illness_ injury_ bereavement_ stress in last 2 years: Marital separation/divorce	0	ukbb	European	SNPs from the MHC (chr6 26M~34M) region was removed for this traits	0.1216	0.0946	1.2858	0.1985	0.004	0.0014	1.0099	0.0068	-0.001	0.0056
POAG	Number of operations_ self-reported	0	ukbb	European	SNPs from the MHC (chr6 26M~34M) region was removed for this traits	0.0452	0.0352	1.2848	0.1989	0.0383	0.0022	1.0352	0.0076	0.0041	0.0057
POAG	Triglycerides in small VLDL	27005778	metabolites	European	SNPs from the MHC (chr6 26M~34M) region was removed for this traits	-0.0773	0.0602	-1.2837	0.1992	0.1214	0.0348	0.9935	0.0072	-0.0036	0.0047
POAG	Diagnoses - main ICD10: C50 Malignant neoplasm of breast	0	ukbb	European	SNPs from the MHC (chr6 26M~34M) region was removed for this traits	0.0803	0.0626	1.2827	0.1996	0.009	0.0016	1.0026	0.0073	-0.0047	0.0054
POAG	Forced vital capacity (FVC)_ Best measure	0	ukbb	European	SNPs from the MHC (chr6 26M~34M) region was removed for this traits	-0.0321	0.0251	-1.2817	0.2	0.1886	0.0085	1.0816	0.0169	-0.0028	0.0075
POAG	Illness_ injury_ bereavement_ stress in last 2 years: Death of a close relative	0	ukbb	European	SNPs from the MHC (chr6 26M~34M) region was removed for this traits	-0.0815	0.0644	-1.2651	0.2058	0.0063	0.0015	1.0042	0.0062	0.0088	0.0053
POAG	Non-cancer illness code_ self-reported: diverticular disease/diverticulitis	0	ukbb	European	SNPs from the MHC (chr6 26M~34M) region was removed for this traits	0.0606	0.0481	1.2607	0.2074	0.0126	0.0016	0.994	0.0069	0.0087	0.0052
POAG	Seen doctor (GP) for nerves_ anxiety_ tension or depression	0	ukbb	European	SNPs from the MHC (chr6 26M~34M) region was removed for this traits	0.0385	0.0306	1.2595	0.2079	0.0613	0.003	1.0143	0.0094	-0.0007	0.0054
POAG	Non-cancer illness code_ self-reported: pernicious anaemia	0	ukbb	European	SNPs from the MHC (chr6 26M~34M) region was removed for this traits	-0.1059	0.0846	-1.252	0.2106	0.0035	0.0012	0.9918	0.0065	0.0042	0.0052
POAG	Types of physical activity in last 4 weeks: Walking for pleasure (not as a means of transport)	0	ukbb	European	SNPs from the MHC (chr6 26M~34M) region was removed for this traits	0.0418	0.0334	1.2511	0.2109	0.0373	0.002	1.0403	0.0073	-0.0039	0.0057
POAG	Non-cancer illness code_ self-reported: pulmonary embolism +/- dvt	0	ukbb	European	SNPs from the MHC (chr6 26M~34M) region was removed for this traits	-0.087	0.0698	-1.245	0.2131	0.0055	0.0015	1.0076	0.0072	0.0039	0.0052
POAG	Transport type for commuting to job workplace: Public transport	0	ukbb	European	SNPs from the MHC (chr6 26M~34M) region was removed for this traits	0.0564	0.0453	1.2448	0.2132	0.0314	0.0035	1.025	0.0074	-0.0044	0.0054
POAG	FEV1/FVC	0	lung_function	European	SNPs from the MHC (chr6 26M~34M) region was removed for this traits	-0.0472	0.0379	-1.2449	0.2132	0.0968	0.0094	0.9908	0.0071	0.0052	0.0053
POAG	Non-cancer illness code_ self-reported: joint disorder	0	ukbb	European	SNPs from the MHC (chr6 26M~34M) region was removed for this traits	0.1442	0.1165	1.2385	0.2155	0.0022	0.0013	0.9915	0.0062	-0.003	0.005
POAG	Why reduced smoking: Illness or ill health	0	ukbb	European	SNPs from the MHC (chr6 26M~34M) region was removed for this traits	-0.12	0.097	-1.2375	0.2159	0.1083	0.0423	0.998	0.0063	0.0061	0.0054
POAG	Urinary albumin-to-creatinine ratio	26631737	kidney	European	SNPs from the MHC (chr6 26M~34M) region was removed for this traits	0.0787	0.0638	1.2341	0.2172	0.0456	0.0087	0.9964	0.0068	0.0021	0.0058
POAG	Risk taking	0	ukbb	European	SNPs from the MHC (chr6 26M~34M) region was removed for this traits	-0.0387	0.0314	-1.2325	0.2178	0.0557	0.0028	1.0042	0.0088	-0.0038	0.0059
POAG	Handedness (chirality/laterality): Use both right and left hands equally	0	ukbb	European	SNPs from the MHC (chr6 26M~34M) region was removed for this traits	-0.1017	0.0829	-1.2272	0.2198	0.0042	0.0014	1.0062	0.0067	0.0071	0.0051
POAG	Child birth weight	23202124	anthropometric	European	SNPs from the MHC (chr6 26M~34M) region was removed for this traits	-0.0599	0.0489	-1.2244	0.2208	0.1131	0.0183	1.004	0.0057	0.0057	0.0048
POAG	Child birth length	25281659	anthropometric	European	SNPs from the MHC (chr6 26M~34M) region was removed for this traits	-0.0673	0.055	-1.2236	0.2211	0.1698	0.0233	0.9925	0.0071	0.0045	0.0059
POAG	Non-cancer illness code_ self-reported: crohns disease	0	ukbb	European	SNPs from the MHC (chr6 26M~34M) region was removed for this traits	0.0934	0.0771	1.2128	0.2252	0.0053	0.0015	1.0049	0.0067	-0.0028	0.0049
POAG	Diagnoses - main ICD10: S09 Other and unspecified injuries of head	0	ukbb	European	SNPs from the MHC (chr6 26M~34M) region was removed for this traits	0.1018	0.084	1.2111	0.2259	0.004	0.0015	0.9938	0.0063	-0.0033	0.0051
POAG	Primary sclerosing cholangitis	27992413	autoimmune	Mixed	Caution: using this data may yield results outside bounds due to relative low Z score of the SNP heritability of the trait; SNPs from the MHC (chr6 26M~34M) region was removed for this traits	0.0692	0.0572	1.2102	0.2262	0.3914	0.1577	0.995	0.0153	-0.0094	0.0056
POAG	Handedness (chirality/laterality): Left-handed	0	ukbb	European	SNPs from the MHC (chr6 26M~34M) region was removed for this traits	0.0735	0.0608	1.2102	0.2262	0.0098	0.0016	1.006	0.0071	-0.0005	0.0051
POAG	Diabetes diagnosed by doctor	0	ukbb	European	SNPs from the MHC (chr6 26M~34M) region was removed for this traits	0.0421	0.0348	1.2091	0.2266	0.0436	0.0027	1.0407	0.0106	0.0087	0.0059
POAG	Hearing aid user	0	ukbb	European	SNPs from the MHC (chr6 26M~34M) region was removed for this traits	-0.0657	0.0543	-1.2086	0.2268	0.0169	0.0027	1.0051	0.0068	0.0159	0.0053
POAG	Duration of strenuous sports	0	ukbb	European	SNPs from the MHC (chr6 26M~34M) region was removed for this traits	0.1247	0.1035	1.2048	0.2283	0.0316	0.0137	0.9936	0.0069	-0.0063	0.0055
POAG	Heel bone mineral density (BMD) T-score_ automated (left)	0	ukbb	European	SNPs from the MHC (chr6 26M~34M) region was removed for this traits	0.0345	0.0286	1.2036	0.2287	0.3011	0.0356	1.0314	0.0215	0.005	0.0065
POAG	Frequency of other exercises in last 4 weeks	0	ukbb	European	SNPs from the MHC (chr6 26M~34M) region was removed for this traits	0.0634	0.0527	1.2031	0.2289	0.0211	0.0033	0.9984	0.0065	-0.0079	0.0054
POAG	Sensitivity / hurt feelings	0	ukbb	European	SNPs from the MHC (chr6 26M~34M) region was removed for this traits	0.0359	0.0299	1.2023	0.2292	0.0626	0.0031	1.0208	0.0094	-0.0075	0.006
POAG	Illnesses of siblings: None of the above (group 2)	0	ukbb	European	SNPs from the MHC (chr6 26M~34M) region was removed for this traits	-0.0729	0.0608	-1.1987	0.2307	0.0089	0.0018	1.003	0.0068	0.004	0.0049
POAG	Pack years adult smoking as proportion of life span exposed to smoking PREVIEW ONLY	0	ukbb	European	SNPs from the MHC (chr6 26M~34M) region was removed for this traits	-0.0426	0.0356	-1.1974	0.2311	0.127	0.0113	1.015	0.0098	0.0149	0.0062
POAG	Diagnoses - main ICD10: K62 Other diseases of anus and rectum	0	ukbb	European	SNPs from the MHC (chr6 26M~34M) region was removed for this traits	-0.1085	0.0907	-1.196	0.2317	0.0049	0.0015	1.0022	0.0067	0.005	0.0058
POAG	Non-cancer illness code_ self-reported: hiatus hernia	0	ukbb	European	SNPs from the MHC (chr6 26M~34M) region was removed for this traits	0.073	0.0613	1.1911	0.2336	0.0083	0.0014	1.0327	0.0064	-0.0068	0.0051
POAG	Peak expiratory flow	0	lung_function	European	SNPs from the MHC (chr6 26M~34M) region was removed for this traits	-0.0266	0.0224	-1.1892	0.2344	0.1402	0.008	0.9651	0.0186	-0.0124	0.0065
POAG	Glutamine	27005778	metabolites	European	SNPs from the MHC (chr6 26M~34M) region was removed for this traits	0.086	0.0725	1.1869	0.2353	0.0634	0.0205	1.0181	0.0077	-0.0023	0.005
POAG	Concentration of large VLDL particles	27005778	metabolites	European	SNPs from the MHC (chr6 26M~34M) region was removed for this traits	-0.0702	0.0593	-1.1842	0.2363	0.1306	0.0344	0.9744	0.0068	-0.0047	0.0047
POAG	Non-cancer illness code_ self-reported: psoriasis	0	ukbb	European	SNPs from the MHC (chr6 26M~34M) region was removed for this traits	-0.0819	0.0695	-1.1771	0.2392	0.007	0.0015	1.018	0.0083	0.0038	0.0055
POAG	Forced expiratory volume in 1 second	0	lung_function	European	SNPs from the MHC (chr6 26M~34M) region was removed for this traits	-0.0437	0.0372	-1.1744	0.2402	0.1288	0.0098	0.9952	0.0079	0.0041	0.0058
POAG	Heel bone mineral density (BMD) T-score_ automated (right)	0	ukbb	European	SNPs from the MHC (chr6 26M~34M) region was removed for this traits	0.0332	0.0283	1.1714	0.2415	0.3022	0.0362	1.0311	0.0225	0.0068	0.0066
POAG	Cigarettes Per Day	30617275	smoking_behaviour	European	Caution: using this data may yield results outside bounds due to relative low Z score of the SNP heritability of the trait; SNPs from the MHC (chr6 26M~34M) region was removed for this traits	-0.0731	0.0624	-1.1699	0.2421	0.0199	0.0111	1.0082	0.0155	0.0099	0.0063
POAG	Medication for cholesterol_ blood pressure_ diabetes_ or take exogenous hormones: Blood pressure medication	0	ukbb	European	SNPs from the MHC (chr6 26M~34M) region was removed for this traits	0.039	0.0334	1.1679	0.2428	0.1049	0.0066	1.0323	0.0118	0.0016	0.0061
POAG	Illnesses of siblings: None of the above (group 1)	0	ukbb	European	SNPs from the MHC (chr6 26M~34M) region was removed for this traits	-0.0499	0.0427	-1.1677	0.2429	0.0363	0.0026	1.0137	0.0078	0.0038	0.0059
POAG	Idiopathic pulmonary fibrosis	29066090	lung_function	European	Caution: using this data may yield results outside bounds due to relative low Z score of the SNP heritability of the trait; SNPs from the MHC (chr6 26M~34M) region was removed for this traits	-0.1199	0.1029	-1.1657	0.2437	0.1605	0.098	0.835	0.0053	0.0051	0.0043
POAG	Ever unenthusiastic/disinterested for a whole week	0	ukbb	European	SNPs from the MHC (chr6 26M~34M) region was removed for this traits	0.0509	0.0438	1.162	0.2452	0.0575	0.0064	1.0004	0.0074	0.0049	0.0057
POAG	Non-cancer illness code_ self-reported: depression	0	ukbb	European	SNPs from the MHC (chr6 26M~34M) region was removed for this traits	0.0508	0.0438	1.1613	0.2455	0.0186	0.0017	0.9996	0.007	0.0014	0.0055
POAG	Overall health rating	0	ukbb	European	SNPs from the MHC (chr6 26M~34M) region was removed for this traits	0.0307	0.0265	1.1597	0.2462	0.0995	0.0031	1.0631	0.0107	0.0109	0.0064
POAG	Eczema	26482879	autoimmune	Mixed	Caution: using this data may yield less robust results due to minor departure of the LD structure; SNPs from the MHC (chr6 26M~34M) region was removed for this traits	0.0739	0.0637	1.1593	0.2463	0.068	0.0154	1.0237	0.0072	0.006	0.0055
POAG	Total lipids in medium VLDL	27005778	metabolites	European	SNPs from the MHC (chr6 26M~34M) region was removed for this traits	-0.0674	0.0582	-1.158	0.2469	0.1403	0.034	0.9857	0.0066	-0.0043	0.0046
POAG	Diagnoses - main ICD10: T84 Complications of internal orthopaedic prosthetic devices_ implants and grafts	0	ukbb	European	SNPs from the MHC (chr6 26M~34M) region was removed for this traits	0.0877	0.0758	1.1571	0.2472	0.0052	0.0016	0.9905	0.0071	0.0011	0.0049
POAG	Reason for glasses/contact lenses: For long-sightedness_ i.e. for distance and near_ but particularly for near tasks like reading (called hypermetropia)	0	ukbb	European	SNPs from the MHC (chr6 26M~34M) region was removed for this traits	-0.0644	0.0557	-1.156	0.2477	0.01	0.0016	1.0634	0.0071	-0.0481	0.0048
POAG	Forced expiratory volume in 1 second (FEV1)/Forced Vital capacity(FVC)	26635082	lung_function	European	SNPs from the MHC (chr6 26M~34M) region was removed for this traits	-0.0567	0.0491	-1.1551	0.2481	0.1126	0.0147	0.9817	0.0069	0.0044	0.0049
POAG	Impedance of arm (right)	0	ukbb	European	SNPs from the MHC (chr6 26M~34M) region was removed for this traits	0.0279	0.0242	1.1543	0.2484	0.2364	0.0081	1.0814	0.0217	-0.0049	0.0083
POAG	Free cholesterol to esterified cholesterol ratio	27005778	metabolites	European	Caution: using this data may yield results outside bounds due to relative low Z score of the SNP heritability of the trait; SNPs from the MHC (chr6 26M~34M) region was removed for this traits	0.1409	0.1223	1.1521	0.2493	0.059	0.0504	1.013	0.0125	-0.0096	0.0049
POAG	Diagnoses - main ICD10: K80 Cholelithiasis	0	ukbb	European	SNPs from the MHC (chr6 26M~34M) region was removed for this traits	-0.0669	0.0583	-1.1471	0.2514	0.0095	0.0018	1.0235	0.0085	0.0056	0.005
POAG	Free cholesterol in medium VLDL	27005778	metabolites	European	SNPs from the MHC (chr6 26M~34M) region was removed for this traits	-0.0697	0.0611	-1.1392	0.2546	0.112	0.0334	0.9954	0.007	-0.0037	0.0048
POAG	Why stopped smoking: Health precaution	0	ukbb	European	SNPs from the MHC (chr6 26M~34M) region was removed for this traits	0.0508	0.0446	1.138	0.2551	0.0541	0.0064	0.9991	0.0066	-0.0082	0.0051
POAG	Duration of heavy DIY	0	ukbb	European	SNPs from the MHC (chr6 26M~34M) region was removed for this traits	0.0518	0.0455	1.1374	0.2554	0.0333	0.0039	1.0079	0.0069	-0.0115	0.0049
POAG	Insomnia	28604731	sleeping	European	SNPs from the MHC (chr6 26M~34M) region was removed for this traits	-0.0483	0.0426	-1.1345	0.2566	0.048	0.0049	1.0021	0.0069	0.006	0.005
POAG	Chronic Kidney Disease	26831199	kidney	Mixed	Caution: using this data may yield less robust results due to minor departure of the LD structure; SNPs from the MHC (chr6 26M~34M) region was removed for this traits	-0.0911	0.0805	-1.1325	0.2574	0.018	0.0058	1.0171	0.0089	0.0134	0.006
POAG	Loneliness_ isolation	0	ukbb	European	SNPs from the MHC (chr6 26M~34M) region was removed for this traits	0.0359	0.0317	1.1324	0.2575	0.038	0.0023	1.0226	0.0077	0.0001	0.0057
POAG	Medication for cholesterol_ blood pressure_ diabetes_ or take exogenous hormones: Cholesterol lowering medication	0	ukbb	European	SNPs from the MHC (chr6 26M~34M) region was removed for this traits	-0.0491	0.0436	-1.1276	0.2595	0.0509	0.0056	1.0246	0.0139	0.0104	0.0064
POAG	Waist circumference	25673412	anthropometric	European	SNPs from the MHC (chr6 26M~34M) region was removed for this traits	-0.0321	0.0286	-1.1237	0.2612	0.121	0.0051	0.8457	0.0076	0.0024	0.0058
POAG	Phospholipids in medium VLDL	27005778	metabolites	European	SNPs from the MHC (chr6 26M~34M) region was removed for this traits	-0.0685	0.0611	-1.1219	0.2619	0.1112	0.0333	0.9965	0.007	-0.003	0.0048
POAG	Illnesses of siblings: Diabetes	0	ukbb	European	SNPs from the MHC (chr6 26M~34M) region was removed for this traits	0.0524	0.047	1.1154	0.2647	0.0205	0.0021	1.01	0.0071	-0.0027	0.0048
POAG	Squamous cell lung cancer	27488534	cancer	European	SNPs from the MHC (chr6 26M~34M) region was removed for this traits	-0.0808	0.0725	-1.1145	0.265	0.039	0.0121	1.01	0.0064	0.0053	0.0053
POAG	Getting up in morning	0	ukbb	European	SNPs from the MHC (chr6 26M~34M) region was removed for this traits	-0.0282	0.0254	-1.1113	0.2664	0.0684	0.0031	1.04	0.0103	0.0058	0.0059
POAG	Forced vital capacity (FVC)	0	ukbb	European	SNPs from the MHC (chr6 26M~34M) region was removed for this traits	-0.028	0.0253	-1.105	0.2692	0.1701	0.0074	1.0953	0.0173	-0.0102	0.0078
POAG	Prospective memory result	0	ukbb	European	SNPs from the MHC (chr6 26M~34M) region was removed for this traits	-0.0473	0.0428	-1.1049	0.2692	0.0577	0.0052	1.0119	0.0077	0.0039	0.0054
POAG	Leptin_not_adjBMI	26833098	hormone	European	SNPs from the MHC (chr6 26M~34M) region was removed for this traits	-0.0628	0.057	-1.1029	0.2701	0.0994	0.016	0.9942	0.0065	0.0017	0.0054
POAG	Smoking status: Previous	0	ukbb	European	SNPs from the MHC (chr6 26M~34M) region was removed for this traits	0.037	0.0337	1.0982	0.2721	0.052	0.003	1.0197	0.0097	-0.0066	0.0063
POAG	Parkinsons disease	19915575	neurological	European	SNPs from the MHC (chr6 26M~34M) region was removed for this traits	0.0521	0.0475	1.0963	0.2729	0.4092	0.1191	1.1236	0.009	-0.0085	0.0049
POAG	Pulse rate_ automated reading	0	ukbb	European	SNPs from the MHC (chr6 26M~34M) region was removed for this traits	0.0283	0.0258	1.0946	0.2737	0.1544	0.0106	1.0467	0.0282	0.0122	0.008
POAG	Illnesses of mother: None of the above (group 1)	0	ukbb	European	SNPs from the MHC (chr6 26M~34M) region was removed for this traits	-0.06	0.055	-1.0921	0.2748	0.0169	0.0018	1.0127	0.0072	0.0021	0.0059
POAG	Number of live births	0	ukbb	European	SNPs from the MHC (chr6 26M~34M) region was removed for this traits	-0.0342	0.0316	-1.0846	0.2781	0.0615	0.0041	1.0075	0.008	0.0009	0.0056
POAG	Anorexia Nervosa	24514567	psychiatric	European	SNPs from the MHC (chr6 26M~34M) region was removed for this traits	0.034	0.0315	1.0818	0.2793	0.5557	0.0308	0.8982	0.007	0.0022	0.0052
POAG	Illnesses of siblings: High blood pressure	0	ukbb	European	SNPs from the MHC (chr6 26M~34M) region was removed for this traits	0.0423	0.0392	1.0795	0.2804	0.0366	0.0027	1.0067	0.008	0.0015	0.0056
POAG	Fracture resulting from simple fall	0	ukbb	European	SNPs from the MHC (chr6 26M~34M) region was removed for this traits	-0.0809	0.075	-1.0783	0.2809	0.0493	0.0139	0.9936	0.0062	0.0069	0.0049
POAG	Bring up phlegm/sputum/mucus on most days	0	ukbb	European	SNPs from the MHC (chr6 26M~34M) region was removed for this traits	-0.0645	0.0599	-1.0779	0.2811	0.0261	0.006	1.0086	0.0072	0.0076	0.0045
POAG	Non-cancer illness code_ self-reported: eczema/dermatitis	0	ukbb	European	SNPs from the MHC (chr6 26M~34M) region was removed for this traits	0.0651	0.0604	1.0776	0.2812	0.0083	0.0022	1.0154	0.007	0.0002	0.0056
POAG	Exposure to tobacco smoke outside home	0	ukbb	European	SNPs from the MHC (chr6 26M~34M) region was removed for this traits	-0.0385	0.0358	-1.0764	0.2817	0.0317	0.0024	1.0202	0.0085	0.0116	0.0054
POAG	Pack years of smoking PREVIEW ONLY	0	ukbb	European	SNPs from the MHC (chr6 26M~34M) region was removed for this traits	-0.0402	0.0373	-1.0759	0.282	0.1096	0.01	1.0154	0.0093	0.0158	0.0061
POAG	Inflammatory Bowel Disease (Euro)	26192919	autoimmune	European	SNPs from the MHC (chr6 26M~34M) region was removed for this traits	-0.0342	0.0318	-1.0743	0.2827	0.3378	0.0336	1.0511	0.0097	0.0097	0.0051
POAG	Alcohol intake frequency.	0	ukbb	European	SNPs from the MHC (chr6 26M~34M) region was removed for this traits	0.0276	0.0258	1.072	0.2837	0.0835	0.004	1.0443	0.0103	0.0003	0.0058
POAG	Mouth/teeth dental problems: Mouth ulcers	0	ukbb	European	SNPs from the MHC (chr6 26M~34M) region was removed for this traits	0.0389	0.0366	1.0632	0.2877	0.0292	0.0038	1.0313	0.011	-0.0059	0.0054
POAG	Number of days/week of vigorous physical activity 10+ minutes	0	ukbb	European	SNPs from the MHC (chr6 26M~34M) region was removed for this traits	0.0346	0.0328	1.0574	0.2903	0.038	0.0024	1.0155	0.0082	-0.0173	0.0056
POAG	Diagnoses - main ICD10: I10 Essential (primary) hypertension	0	ukbb	European	SNPs from the MHC (chr6 26M~34M) region was removed for this traits	-0.1203	0.1138	-1.0573	0.2904	0.0026	0.0013	0.9978	0.0061	0.0078	0.0057
POAG	Albumin	27005778	metabolites	European	Caution: using this data may yield results outside bounds due to relative low Z score of the SNP heritability of the trait; SNPs from the MHC (chr6 26M~34M) region was removed for this traits	0.0975	0.0928	1.0509	0.2933	0.0606	0.0246	0.9893	0.0067	-0.0017	0.0049
POAG	Maternal smoking around birth	0	ukbb	European	SNPs from the MHC (chr6 26M~34M) region was removed for this traits	-0.0307	0.0293	-1.0491	0.2941	0.0497	0.0028	1.0366	0.009	-0.0019	0.0053
POAG	Eye problems/disorders: Diabetes related eye disease	0	ukbb	European	SNPs from the MHC (chr6 26M~34M) region was removed for this traits	0.068	0.0648	1.049	0.2942	0.0199	0.0043	1.0069	0.0063	0.0227	0.005
POAG	Pain type(s) experienced in last month: Back pain	0	ukbb	European	SNPs from the MHC (chr6 26M~34M) region was removed for this traits	-0.0335	0.0321	-1.0438	0.2966	0.0392	0.0023	1.0251	0.0092	0.0145	0.0059
POAG	Hand grip strength (right)	0	ukbb	European	SNPs from the MHC (chr6 26M~34M) region was removed for this traits	-0.0279	0.027	-1.0319	0.3021	0.1039	0.0042	1.061	0.0134	-0.0017	0.0066
POAG	Weight change compared with 1 year ago	0	ukbb	European	SNPs from the MHC (chr6 26M~34M) region was removed for this traits	-0.0588	0.0572	-1.027	0.3044	0.0085	0.0014	1.0227	0.0063	-1.79e-06	0.005
POAG	Triglycerides in small HDL	27005778	metabolites	European	Caution: using this data may yield results outside bounds due to relative low Z score of the SNP heritability of the trait; SNPs from the MHC (chr6 26M~34M) region was removed for this traits	-0.0875	0.0853	-1.0259	0.3049	0.0668	0.0267	0.9983	0.008	4.05e-05	0.005
POAG	Mean platelet volume	22139419	haemotological	European	SNPs from the MHC (chr6 26M~34M) region was removed for this traits	-0.0504	0.0495	-1.0168	0.3093	0.3202	0.0507	0.9814	0.0106	0.0048	0.0061
POAG	Diagnoses - main ICD10: K22 Other diseases of oesophagus	0	ukbb	European	SNPs from the MHC (chr6 26M~34M) region was removed for this traits	0.0904	0.0895	1.0096	0.3127	0.0041	0.0015	1.005	0.0067	-0.0073	0.0053
POAG	Past tobacco smoking	0	ukbb	European	SNPs from the MHC (chr6 26M~34M) region was removed for this traits	-0.029	0.0288	-1.0093	0.3128	0.0912	0.0041	1.0209	0.0104	0.0081	0.0061
POAG	Cholesterol esters in large VLDL	27005778	metabolites	European	SNPs from the MHC (chr6 26M~34M) region was removed for this traits	-0.056	0.0557	-1.0054	0.3147	0.1642	0.0336	0.9777	0.0069	-0.0027	0.0045
POAG	Medication for pain relief_ constipation_ heartburn: None of the above	0	ukbb	European	SNPs from the MHC (chr6 26M~34M) region was removed for this traits	-0.0295	0.0294	-1.0038	0.3155	0.0543	0.0027	1.0295	0.0088	-0.011	0.0056
POAG	Headaches for 3+ months	0	ukbb	European	SNPs from the MHC (chr6 26M~34M) region was removed for this traits	0.0524	0.0524	0.9995	0.3176	0.0554	0.0072	1.0071	0.0065	-9.77e-05	0.0055
POAG	Lung cancer (squamous cell)	24880342	cancer	European	Caution: using this data may yield results outside bounds due to relative low Z score of the SNP heritability of the trait; SNPs from the MHC (chr6 26M~34M) region was removed for this traits	-0.0845	0.0846	-0.9991	0.3177	0.0507	0.0195	1.0063	0.0066	0.0043	0.0054
POAG	Health satisfaction	0	ukbb	European	SNPs from the MHC (chr6 26M~34M) region was removed for this traits	0.039	0.0391	0.9978	0.3184	0.0829	0.0054	1.0066	0.0075	0.0056	0.006
POAG	Impedance of whole body	0	ukbb	European	SNPs from the MHC (chr6 26M~34M) region was removed for this traits	0.0243	0.0243	0.9972	0.3187	0.2579	0.0092	1.0885	0.0215	0.0016	0.0085
POAG	18:2 linoleic acid (LA)	27005778	metabolites	European	SNPs from the MHC (chr6 26M~34M) region was removed for this traits	0.0746	0.0748	0.9969	0.3188	0.1267	0.0483	1.0032	0.0099	-0.0069	0.005
POAG	Non-cancer illness code_ self-reported: rheumatoid arthritis	0	ukbb	European	SNPs from the MHC (chr6 26M~34M) region was removed for this traits	-0.0847	0.085	-0.9961	0.3192	0.0048	0.0014	1.004	0.0066	0.0056	0.0051
POAG	Lung cancer (all)	24880342	cancer	European	SNPs from the MHC (chr6 26M~34M) region was removed for this traits	0.058	0.0584	0.9924	0.321	0.1267	0.0293	1.0083	0.008	-0.0041	0.0059
POAG	Illnesses of siblings: Heart disease	0	ukbb	European	SNPs from the MHC (chr6 26M~34M) region was removed for this traits	-0.054	0.0547	-0.9878	0.3233	0.0171	0.0022	1.0126	0.0072	0.0075	0.0058
POAG	Triglycerides in large VLDL	27005778	metabolites	European	SNPs from the MHC (chr6 26M~34M) region was removed for this traits	-0.0638	0.0648	-0.9838	0.3252	0.1124	0.0287	0.9885	0.0063	-0.0034	0.005
POAG	Age of smoking initiation	20418890	smoking_behaviour	European	SNPs from the MHC (chr6 26M~34M) region was removed for this traits	0.0751	0.0767	0.9789	0.3276	0.0619	0.0187	0.9991	0.0063	-0.0045	0.0051
POAG	Celiac disease	20190752	autoimmune	European	SNPs from the MHC (chr6 26M~34M) region was removed for this traits	-0.0623	0.0639	-0.9745	0.3298	0.307	0.0485	1.0654	0.0106	0.0117	0.008
POAG	Doctor diagnosed asthma	0	ukbb	European	SNPs from the MHC (chr6 26M~34M) region was removed for this traits	0.0425	0.0436	0.9746	0.3298	0.0693	0.0097	0.9991	0.0079	-0.0042	0.0054
POAG	Ever highly irritable/argumentative for 2 days	0	ukbb	European	SNPs from the MHC (chr6 26M~34M) region was removed for this traits	0.0432	0.0445	0.9707	0.3317	0.0519	0.0056	0.9985	0.0075	0.0004	0.0051
POAG	Neuroticism	27089181	personality	European	SNPs from the MHC (chr6 26M~34M) region was removed for this traits	0.0348	0.036	0.9672	0.3334	0.0892	0.0075	0.9903	0.0118	-0.0005	0.0063
POAG	Free cholesterol	27005778	metabolites	European	Caution: using this data may yield results outside bounds due to relative low Z score of the SNP heritability of the trait; SNPs from the MHC (chr6 26M~34M) region was removed for this traits	0.106	0.1106	0.9585	0.3378	0.0663	0.0425	1.0237	0.0107	-0.0087	0.0048
POAG	Family relationship satisfaction	0	ukbb	European	SNPs from the MHC (chr6 26M~34M) region was removed for this traits	0.0383	0.0401	0.9567	0.3387	0.0577	0.0051	1.0044	0.0074	0.0011	0.0053
POAG	Mood swings	0	ukbb	European	SNPs from the MHC (chr6 26M~34M) region was removed for this traits	0.0271	0.0283	0.9564	0.3389	0.0711	0.0032	1.0174	0.0098	-0.0009	0.0066
POAG	Lumbar spine bone mineral density	22504420	bone	Mixed	Caution: using these data may yield less robust results due to minor departure of the LD structure; SNPs from the MHC (chr6 26M-34M) region were removed for this trait	0.0361	0.0379	0.9522	0.341	0.2721	0.0249	1.012	0.0085	0.0027	0.0053
POAG	Ever manic/hyper for 2 days	0	ukbb	European	SNPs from the MHC (chr6 26M~34M) region was removed for this traits	0.0608	0.0638	0.9521	0.341	0.0184	0.0048	0.9949	0.0064	0.0046	0.0046
POAG	Smoking/smokers in household	0	ukbb	European	SNPs from the MHC (chr6 26M~34M) region was removed for this traits	0.0527	0.0557	0.946	0.3442	0.0101	0.0019	1.0104	0.0075	-0.0025	0.0049
POAG	Non-cancer illness code_ self-reported: diabetes	0	ukbb	European	SNPs from the MHC (chr6 26M~34M) region was removed for this traits	0.0347	0.0367	0.9459	0.3442	0.0356	0.0025	1.0387	0.0104	0.0123	0.0059
POAG	Qualifications: CSEs or equivalent	0	ukbb	European	SNPs from the MHC (chr6 26M~34M) region was removed for this traits	-0.0394	0.0417	-0.9452	0.3445	0.0207	0.0019	1.0604	0.0073	0.0009	0.0053
POAG	Forced expiratory volume in 1-second (FEV1)	0	ukbb	European	SNPs from the MHC (chr6 26M~34M) region was removed for this traits	-0.0251	0.0266	-0.9431	0.3456	0.1476	0.0061	1.0651	0.0136	-0.0107	0.0073
POAG	Apolipoprotein A-I	27005778	metabolites	European	SNPs from the MHC (chr6 26M~34M) region was removed for this traits	0.0822	0.0875	0.9396	0.3474	0.0732	0.0307	1.0054	0.0117	-0.0045	0.0047
POAG	Lung cancer	27488534	cancer	European	SNPs from the MHC (chr6 26M~34M) region was removed for this traits	0.0499	0.0533	0.9359	0.3493	0.3125	0.066	1.0152	0.0072	-0.0026	0.0054
POAG	Femoral neck bone mineral density	22504420	bone	Mixed	Caution: using these data may yield less robust results due to minor departure of the LD structure; SNPs from the MHC (chr6 26M-34M) region were removed for this trait	-0.036	0.0387	-0.9317	0.3515	0.3041	0.0252	0.98	0.0085	0.0087	0.0057
POAG	Non-cancer illness code_ self-reported: hypopituitarism	0	ukbb	European	SNPs from the MHC (chr6 26M~34M) region was removed for this traits	0.1227	0.1325	0.926	0.3544	0.0015	0.0012	0.9906	0.0061	0.0008	0.0047
POAG	Hearing difficulty/problems with background noise	0	ukbb	European	SNPs from the MHC (chr6 26M~34M) region was removed for this traits	0.0271	0.0293	0.9235	0.3558	0.0516	0.0026	1.0201	0.0083	-0.0054	0.0059
POAG	Lung adenocarcinoma	27488534	cancer	European	Caution: using this data may yield results outside bounds due to relative low Z score of the SNP heritability of the trait; SNPs from the MHC (chr6 26M~34M) region was removed for this traits	0.071	0.0774	0.9177	0.3588	0.0317	0.0112	1.0192	0.0063	-0.0017	0.0043
POAG	Peak expiratory flow	0	lung_function	European	SNPs from the MHC (chr6 26M~34M) region was removed for this traits	-0.0214	0.0233	-0.9172	0.359	0.1462	0.0084	0.9612	0.018	-0.0146	0.0065
POAG	Type of tobacco previously smoked: Cigars or pipes	0	ukbb	European	SNPs from the MHC (chr6 26M~34M) region was removed for this traits	-0.0943	0.1032	-0.9137	0.3609	0.0127	0.0052	0.999	0.0061	0.0055	0.0052
POAG	Mineral and other dietary supplements: Calcium	0	ukbb	European	SNPs from the MHC (chr6 26M~34M) region was removed for this traits	0.0426	0.0469	0.9086	0.3635	0.0125	0.0016	0.9975	0.0064	-0.0034	0.005
POAG	Phospholipids in very large VLDL	27005778	metabolites	European	SNPs from the MHC (chr6 26M~34M) region was removed for this traits	-0.0565	0.0623	-0.9072	0.3643	0.1072	0.0277	0.9853	0.0066	-0.0053	0.0047
POAG	Phospholipids in chylomicrons and largest VLDL particles	27005778	metabolites	European	SNPs from the MHC (chr6 26M~34M) region was removed for this traits	-0.0625	0.0689	-0.9069	0.3645	0.0966	0.0266	0.9853	0.0066	-0.0028	0.005
POAG	Maximum heart rate during fitness test	0	ukbb	European	SNPs from the MHC (chr6 26M~34M) region was removed for this traits	0.0594	0.0655	0.9063	0.3648	0.0681	0.0133	1.0161	0.0085	0.0058	0.0059
POAG	Body mass index (BMI)	0	ukbb	European	SNPs from the MHC (chr6 26M~34M) region was removed for this traits	-0.0192	0.0212	-0.905	0.3654	0.2474	0.0082	1.0726	0.0183	0.0021	0.0075
POAG	Forced expiratory volume in 1 second (FEV1)	21946350	lung_function	European	SNPs from the MHC (chr6 26M~34M) region was removed for this traits	-0.0497	0.0555	-0.8962	0.3702	0.1727	0.0222	0.8807	0.012	0.0045	0.0088
POAG	Bilateral oophorectomy (both ovaries removed)	0	ukbb	European	SNPs from the MHC (chr6 26M~34M) region was removed for this traits	0.0472	0.0528	0.8947	0.3709	0.0212	0.0033	1.011	0.0072	0.0019	0.0055
POAG	Diagnoses - main ICD10: F31 Bipolar affective disorder	0	ukbb	European	SNPs from the MHC (chr6 26M~34M) region was removed for this traits	-0.0719	0.0804	-0.8942	0.3712	0.0048	0.0015	0.9874	0.0071	0.004	0.0052
POAG	Neuroticism	24828478	personality	European	SNPs from the MHC (chr6 26M~34M) region was removed for this traits	-0.0546	0.0614	-0.8904	0.3732	0.0148	0.0033	1.0082	0.0061	0.0051	0.0051
POAG	Blood clot_ DVT_ bronchitis_ emphysema_ asthma_ rhinitis_ eczema_ allergy diagnosed by doctor: Emphysema/chronic bronchitis	0	ukbb	European	SNPs from the MHC (chr6 26M~34M) region was removed for this traits	0.0459	0.0516	0.8904	0.3733	0.0127	0.0017	0.9851	0.007	-0.0003	0.0058
POAG	Blood clot_ DVT_ bronchitis_ emphysema_ asthma_ rhinitis_ eczema_ allergy diagnosed by doctor: Blood clot in the lung	0	ukbb	European	SNPs from the MHC (chr6 26M~34M) region was removed for this traits	-0.0607	0.0683	-0.8896	0.3737	0.0059	0.0015	1.0081	0.0071	0.0025	0.0053
POAG	Neck/shoulder pain for 3+ months	0	ukbb	European	SNPs from the MHC (chr6 26M~34M) region was removed for this traits	0.0692	0.0781	0.8858	0.3757	0.0211	0.006	1.0082	0.0073	-0.0017	0.0052
POAG	Total lipids in very large VLDL	27005778	metabolites	European	SNPs from the MHC (chr6 26M~34M) region was removed for this traits	-0.0559	0.0632	-0.884	0.3767	0.1371	0.0294	0.9784	0.007	-0.0048	0.0047
POAG	Bipolar disorder	21926972	psychiatric	European	SNPs from the MHC (chr6 26M~34M) region was removed for this traits	0.0349	0.0396	0.8831	0.3772	0.4327	0.0368	1.0226	0.0072	-0.0053	0.0054
POAG	Non-cancer illness code_ self-reported: ankylosing spondylitis	0	ukbb	European	SNPs from the MHC (chr6 26M~34M) region was removed for this traits	0.1246	0.1428	0.873	0.3827	0.0016	0.0014	1.0028	0.0066	-0.0005	0.0051
POAG	Non-cancer illness code_ self-reported: type 2 diabetes	0	ukbb	European	SNPs from the MHC (chr6 26M~34M) region was removed for this traits	0.0634	0.0728	0.871	0.3837	0.0062	0.0014	1.0118	0.0064	-0.0059	0.0053
POAG	Diagnoses - main ICD10: G47 Sleep disorders	0	ukbb	European	SNPs from the MHC (chr6 26M~34M) region was removed for this traits	0.0608	0.0701	0.8671	0.3859	0.0063	0.0015	0.9942	0.0072	0.0053	0.0053
POAG	Free cholesterol in large VLDL	27005778	metabolites	European	SNPs from the MHC (chr6 26M~34M) region was removed for this traits	-0.051	0.0589	-0.8663	0.3863	0.1237	0.0298	0.9885	0.0066	-0.0044	0.0048
POAG	2hr glucose adjusted for BMI	20081857	glycemic	European	Caution: using this data may yield results outside bounds due to relative low Z score of the SNP heritability of the trait; SNPs from the MHC (chr6 26M~34M) region was removed for this traits	0.0664	0.0766	0.8661	0.3865	0.1021	0.0344	0.9934	0.0071	0.0017	0.0059
POAG	Illnesses of mother: Heart disease	0	ukbb	European	SNPs from the MHC (chr6 26M~34M) region was removed for this traits	0.0511	0.0591	0.8655	0.3867	0.0157	0.0019	1.0106	0.0068	0.0025	0.0057
POAG	Average weekly fortified wine intake	0	ukbb	European	SNPs from the MHC (chr6 26M~34M) region was removed for this traits	-0.0523	0.061	-0.8582	0.3908	0.0126	0.0022	1.0175	0.0066	0.004	0.0058
POAG	Diagnoses - main ICD10: K35 Acute appendicitis	0	ukbb	European	SNPs from the MHC (chr6 26M~34M) region was removed for this traits	-0.1009	0.119	-0.8479	0.3965	0.0023	0.0013	1.0045	0.0069	-0.0032	0.0055
POAG	Ever smoked	0	ukbb	European	SNPs from the MHC (chr6 26M~34M) region was removed for this traits	0.0233	0.0276	0.843	0.3993	0.0751	0.0034	1.0224	0.0102	-0.0084	0.0059
POAG	Pain type(s) experienced in last month: Pain all over the body	0	ukbb	European	SNPs from the MHC (chr6 26M~34M) region was removed for this traits	-0.0451	0.0535	-0.8424	0.3996	0.0104	0.0016	1.0032	0.0073	0.0061	0.0047
POAG	FEV1/FVC	0	lung_function	European	SNPs from the MHC (chr6 26M~34M) region was removed for this traits	-0.018	0.0214	-0.842	0.3998	0.1661	0.0098	0.9642	0.0197	-0.0014	0.0067
POAG	Total lipids in large VLDL	27005778	metabolites	European	SNPs from the MHC (chr6 26M~34M) region was removed for this traits	-0.0525	0.0624	-0.8403	0.4007	0.139	0.0299	0.9853	0.0064	-0.0036	0.0049
POAG	Diagnoses - main ICD10: R69 Unknown and unspecified causes of morbidity	0	ukbb	European	SNPs from the MHC (chr6 26M~34M) region was removed for this traits	0.0625	0.0745	0.8385	0.4017	0.0052	0.0014	0.9986	0.0067	-0.004	0.0048
POAG	Childhood IQ	23358156	education	European	SNPs from the MHC (chr6 26M~34M) region was removed for this traits	-0.0518	0.0619	-0.8379	0.4021	0.2756	0.045	1.0016	0.0093	0.0026	0.007
POAG	Concentration of very large VLDL particles	27005778	metabolites	European	SNPs from the MHC (chr6 26M~34M) region was removed for this traits	-0.054	0.0648	-0.8344	0.4041	0.1257	0.0296	0.9831	0.0068	-0.0065	0.0046
POAG	Rheumatoid Arthritis	24390342	autoimmune	European	SNPs from the MHC (chr6 26M~34M) region was removed for this traits	-0.0288	0.0346	-0.8314	0.4058	0.161	0.0285	1.0219	0.016	0.0026	0.0048
POAG	Pain type(s) experienced in last month: None of the above	0	ukbb	European	SNPs from the MHC (chr6 26M~34M) region was removed for this traits	-0.0246	0.0298	-0.8246	0.4096	0.0552	0.0027	1.0371	0.0086	-0.0021	0.0063
POAG	Frequency of stair climbing in last 4 weeks	0	ukbb	European	SNPs from the MHC (chr6 26M~34M) region was removed for this traits	0.0265	0.0323	0.8209	0.4117	0.035	0.0021	1.0171	0.0076	-0.0127	0.0057
POAG	Medication for pain relief_ constipation_ heartburn: Ibuprofen (e.g. Nurofen)	0	ukbb	European	SNPs from the MHC (chr6 26M~34M) region was removed for this traits	0.033	0.0404	0.8184	0.4131	0.0226	0.0017	0.9975	0.0064	-0.0036	0.0055
POAG	Vitamin and mineral supplements: Multivitamins +/- minerals	0	ukbb	European	SNPs from the MHC (chr6 26M~34M) region was removed for this traits	0.0354	0.0436	0.8124	0.4166	0.0236	0.0019	1.0076	0.0076	-0.0069	0.0053
POAG	Arm predicted mass (left)	0	ukbb	European	SNPs from the MHC (chr6 26M~34M) region was removed for this traits	-0.0194	0.0241	-0.8063	0.42	0.2641	0.0105	1.1126	0.026	0.0026	0.009
POAG	Ever depressed for a whole week	0	ukbb	European	SNPs from the MHC (chr6 26M~34M) region was removed for this traits	0.0349	0.0435	0.8031	0.4219	0.064	0.0052	0.992	0.0068	0.0043	0.0059
POAG	Difference in height between childhood and adulthood; age 8	23449627	anthropometric	European	SNPs from the MHC (chr6 26M~34M) region was removed for this traits	0.0485	0.0607	0.7983	0.4247	0.3342	0.0507	0.9723	0.0076	-0.0062	0.006
POAG	Breastfed as a baby	0	ukbb	European	SNPs from the MHC (chr6 26M~34M) region was removed for this traits	-0.0365	0.0458	-0.7972	0.4254	0.0258	0.0024	1.0219	0.007	-0.0031	0.006
POAG	Reason for glasses/contact lenses: For astigmatism	0	ukbb	European	SNPs from the MHC (chr6 26M~34M) region was removed for this traits	0.0444	0.0559	0.7956	0.4263	0.0091	0.0015	1.0265	0.0067	-0.0177	0.0052
POAG	Pain type(s) experienced in last month: Headache	0	ukbb	European	SNPs from the MHC (chr6 26M~34M) region was removed for this traits	0.0249	0.0314	0.7946	0.4268	0.045	0.0027	1.0039	0.0094	0.0016	0.0055
POAG	Serum total cholesterol	27005778	metabolites	European	Caution: using this data may yield results outside bounds due to relative low Z score of the SNP heritability of the trait; SNPs from the MHC (chr6 26M~34M) region was removed for this traits	0.0615	0.0775	0.7939	0.4272	0.0635	0.0383	1.0225	0.0153	-0.0091	0.0045
POAG	Happiness	0	ukbb	European	SNPs from the MHC (chr6 26M~34M) region was removed for this traits	0.03	0.0378	0.794	0.4272	0.0617	0.0048	1.0046	0.0074	0.0047	0.0052
POAG	Attention deficit hyperactivity disorder	20732625	psychiatric	European	Caution: using this data may yield results outside bounds due to relative low Z score of the SNP heritability of the trait; SNPs from the MHC (chr6 26M~34M) region was removed for this traits	-0.0654	0.083	-0.788	0.4307	0.2572	0.0916	1.0048	0.0062	0.001	0.0046
POAG	Qualifications: College or University degree	0	ukbb	European	SNPs from the MHC (chr6 26M~34M) region was removed for this traits	0.0182	0.023	0.788	0.4307	0.1684	0.0052	1.1168	0.0133	-0.005	0.0074
POAG	Loud music exposure frequency	0	ukbb	European	SNPs from the MHC (chr6 26M~34M) region was removed for this traits	0.0431	0.0548	0.787	0.4313	0.0293	0.0047	1.0123	0.0068	-0.0092	0.0051
POAG	Illnesses of father: Diabetes	0	ukbb	European	SNPs from the MHC (chr6 26M~34M) region was removed for this traits	0.0363	0.0465	0.7796	0.4356	0.0183	0.0022	1.0274	0.0077	0.0005	0.0053
POAG	Autism spectrum disorder	0	psychiatric	European	SNPs from the MHC (chr6 26M~34M) region was removed for this traits	-0.0361	0.0465	-0.7768	0.4373	0.464	0.0516	0.9635	0.0067	0.0025	0.0053
POAG	Mean Putamen	25607358	brain_volume	European	SNPs from the MHC (chr6 26M~34M) region was removed for this traits	0.0381	0.0491	0.7761	0.4377	0.2994	0.0462	0.9498	0.0068	-0.0028	0.0051
POAG	Hip circumference	25673412	anthropometric	European	SNPs from the MHC (chr6 26M~34M) region was removed for this traits	-0.0232	0.0301	-0.7706	0.4409	0.127	0.0058	0.8614	0.0081	0.0022	0.0058
POAG	Current employment status: Looking after home and/or family	0	ukbb	European	SNPs from the MHC (chr6 26M~34M) region was removed for this traits	0.0535	0.0696	0.7684	0.4422	0.0061	0.0014	1.0004	0.0067	-0.0003	0.0052
POAG	Concentration of small VLDL particles	27005778	metabolites	European	SNPs from the MHC (chr6 26M~34M) region was removed for this traits	-0.0442	0.0578	-0.7659	0.4437	0.1515	0.0366	0.9898	0.0078	-0.0062	0.0046
POAG	Serum total triglycerides	27005778	metabolites	European	SNPs from the MHC (chr6 26M~34M) region was removed for this traits	-0.0447	0.059	-0.7589	0.4479	0.1255	0.0354	0.9919	0.0074	-0.005	0.0048
POAG	Distance between home and job workplace	0	ukbb	European	SNPs from the MHC (chr6 26M~34M) region was removed for this traits	0.0547	0.0723	0.7565	0.4493	0.0115	0.0032	1.0077	0.0067	-0.0113	0.005
POAG	Total cholesterol in large VLDL	27005778	metabolites	European	SNPs from the MHC (chr6 26M~34M) region was removed for this traits	-0.0449	0.0594	-0.7556	0.4499	0.1176	0.0287	0.9913	0.0067	-0.005	0.0047
POAG	ICV	25607358	brain_volume	European	SNPs from the MHC (chr6 26M~34M) region was removed for this traits	-0.0572	0.076	-0.7526	0.4517	0.1758	0.045	1.0022	0.0068	0.0059	0.0053
POAG	Non-cancer illness code_ self-reported: cholelithiasis/gall stones	0	ukbb	European	SNPs from the MHC (chr6 26M~34M) region was removed for this traits	-0.0478	0.0636	-0.7525	0.4518	0.0083	0.0017	1.0209	0.0077	0.0042	0.0051
POAG	Home area population density - urban or rural: Scotland - Large Urban Area	0	ukbb	European	SNPs from the MHC (chr6 26M~34M) region was removed for this traits	-0.0567	0.0757	-0.7492	0.4538	0.0112	0.0032	2.1365	0.0147	0.0393	0.0078
POAG	Diagnoses - main ICD10: Z80 Family history of malignant neoplasm	0	ukbb	European	SNPs from the MHC (chr6 26M~34M) region was removed for this traits	-0.1201	0.1616	-0.7437	0.4571	0.0013	0.0014	0.9909	0.006	0.0012	0.0052
POAG	Target heart rate achieved	0	ukbb	European	SNPs from the MHC (chr6 26M~34M) region was removed for this traits	0.0609	0.0822	0.7408	0.4588	0.0333	0.0108	1.0068	0.007	-0.0054	0.0049
POAG	Adopted as a child	0	ukbb	European	SNPs from the MHC (chr6 26M~34M) region was removed for this traits	0.0541	0.0734	0.738	0.4605	0.0059	0.0014	1.0017	0.0067	-0.0023	0.0056
POAG	Lumbar Spine bone mineral density	26367794	bone	Mixed	Caution: using this data may yield less robust results due to minor departure of the LD structure; SNPs from the MHC (chr6 26M~34M) region was removed for this traits	0.0308	0.0422	0.7307	0.465	0.1326	0.0151	0.9764	0.008	-0.0019	0.005
POAG	Current employment status: Unable to work because of sickness or disability	0	ukbb	European	SNPs from the MHC (chr6 26M~34M) region was removed for this traits	0.0298	0.0408	0.7299	0.4655	0.0245	0.0019	1.0175	0.0074	0.0064	0.0058
POAG	Had other major operations	0	ukbb	European	SNPs from the MHC (chr6 26M~34M) region was removed for this traits	0.0322	0.0442	0.7293	0.4658	0.0305	0.0032	1.01	0.0069	0.0035	0.0056
POAG	Diagnoses - main ICD10: I80 Phlebitis and thrombophlebitis	0	ukbb	European	SNPs from the MHC (chr6 26M~34M) region was removed for this traits	-0.0451	0.0619	-0.7289	0.4661	0.008	0.0017	0.9945	0.0084	-0.0039	0.0052
POAG	Comparative body size at age 10	0	ukbb	European	SNPs from the MHC (chr6 26M~34M) region was removed for this traits	0.0173	0.0238	0.7282	0.4665	0.1457	0.009	1.0161	0.0162	-0.0046	0.0064
POAG	Number of cigarettes previously smoked daily	0	ukbb	European	SNPs from the MHC (chr6 26M~34M) region was removed for this traits	0.0258	0.0355	0.7248	0.4686	0.1005	0.014	1.0017	0.0088	0.0022	0.0049
POAG	Diagnoses - main ICD10: K43 Ventral hernia	0	ukbb	European	SNPs from the MHC (chr6 26M~34M) region was removed for this traits	0.0529	0.073	0.7242	0.4689	0.0053	0.0014	0.9936	0.0065	0.0015	0.0051
POAG	Comparative height size at age 10	0	ukbb	European	SNPs from the MHC (chr6 26M~34M) region was removed for this traits	0.0175	0.0243	0.7199	0.4716	0.2411	0.012	1.1145	0.0346	-0.003	0.0084
POAG	Non-cancer illness code_ self-reported: vitiligo	0	ukbb	European	SNPs from the MHC (chr6 26M~34M) region was removed for this traits	-0.0861	0.1196	-0.7199	0.4716	0.0018	0.0014	0.9929	0.0069	-0.0004	0.005
POAG	Alcohol usually taken with meals	0	ukbb	European	SNPs from the MHC (chr6 26M~34M) region was removed for this traits	0.0212	0.0298	0.7116	0.4767	0.1102	0.0053	1.0587	0.0091	0.0011	0.0062
POAG	Diagnoses - main ICD10: N20 Calculus of kidney and ureter	0	ukbb	European	SNPs from the MHC (chr6 26M~34M) region was removed for this traits	0.0343	0.0482	0.7115	0.4768	0.0081	0.0014	1.0078	0.0066	-0.0009	0.0046
POAG	Hand grip strength (left)	0	ukbb	European	SNPs from the MHC (chr6 26M~34M) region was removed for this traits	-0.0188	0.0265	-0.7087	0.4785	0.1039	0.0041	1.0555	0.0124	-0.0058	0.0064
POAG	Citrate	27005778	metabolites	European	SNPs from the MHC (chr6 26M~34M) region was removed for this traits	0.0523	0.074	0.7077	0.4791	0.0708	0.021	1.0121	0.0075	0.0065	0.005
POAG	Diagnoses - main ICD10: M70 Soft tissue disorders related to use_ overuse and pressure	0	ukbb	European	SNPs from the MHC (chr6 26M~34M) region was removed for this traits	0.0582	0.0823	0.7078	0.4791	0.004	0.0013	0.9831	0.0066	-0.0014	0.0054
POAG	Diagnoses - main ICD10: K50 Crohns disease [regional enteritis]	0	ukbb	European	SNPs from the MHC (chr6 26M~34M) region was removed for this traits	0.0554	0.0783	0.7075	0.4793	0.0044	0.0014	1.0031	0.0066	-0.0078	0.0051
POAG	Types of physical activity in last 4 weeks: None of the above	0	ukbb	European	SNPs from the MHC (chr6 26M~34M) region was removed for this traits	-0.026	0.0368	-0.7066	0.4798	0.0242	0.0017	1.0166	0.0073	0.0097	0.0049
POAG	Arm fat-free mass (left)	0	ukbb	European	SNPs from the MHC (chr6 26M~34M) region was removed for this traits	-0.017	0.0241	-0.7059	0.4803	0.2649	0.0104	1.1102	0.0256	0.0021	0.009
POAG	Mouth/teeth dental problems: Loose teeth	0	ukbb	European	SNPs from the MHC (chr6 26M~34M) region was removed for this traits	-0.0358	0.051	-0.7024	0.4824	0.0145	0.0017	1.0108	0.007	-0.0012	0.0052
POAG	Tyrosine	27005778	metabolites	European	Caution: using this data may yield results outside bounds due to relative low Z score of the SNP heritability of the trait; SNPs from the MHC (chr6 26M~34M) region was removed for this traits	0.0478	0.0683	0.701	0.4833	0.0754	0.0275	0.9989	0.0067	-0.0035	0.0046
POAG	Smoking Initiation	30617275	smoking_behaviour	European	SNPs from the MHC (chr6 26M~34M) region was removed for this traits	-0.0427	0.061	-0.7004	0.4837	0.0049	0.0011	1.107	0.0096	-0.0027	0.007
POAG	HOMA-B	20081858	glycemic	European	SNPs from the MHC (chr6 26M~34M) region was removed for this traits	-0.0378	0.0539	-0.7002	0.4838	0.0903	0.0136	0.9889	0.0064	-0.0012	0.0056
POAG	Reason for reducing amount of alcohol drunk: Health precaution	0	ukbb	European	SNPs from the MHC (chr6 26M~34M) region was removed for this traits	0.0284	0.0405	0.7002	0.4838	0.0462	0.0045	0.9966	0.0067	-0.0027	0.0051
POAG	Frequency of heavy DIY in last 4 weeks	0	ukbb	European	SNPs from the MHC (chr6 26M~34M) region was removed for this traits	-0.0396	0.0566	-0.7	0.4839	0.0202	0.0036	1.01	0.0062	-0.002	0.0052
POAG	Diagnoses - main ICD10: S66 Injury of muscle and tendon at wrist and hand level	0	ukbb	European	SNPs from the MHC (chr6 26M~34M) region was removed for this traits	-0.0745	0.1072	-0.6945	0.4874	0.0023	0.0012	0.9996	0.0065	0.0022	0.0053
POAG	Number of children fathered	0	ukbb	European	SNPs from the MHC (chr6 26M~34M) region was removed for this traits	0.0334	0.0483	0.6915	0.4893	0.0324	0.0037	1.0104	0.0072	-0.0121	0.0055
POAG	Non-cancer illness code_ self-reported: emphysema/chronic bronchitis	0	ukbb	European	SNPs from the MHC (chr6 26M~34M) region was removed for this traits	0.0392	0.0569	0.6902	0.4901	0.0098	0.0016	0.9878	0.0068	0.0014	0.0059
POAG	Total cholesterol in medium VLDL	27005778	metabolites	European	SNPs from the MHC (chr6 26M~34M) region was removed for this traits	-0.0411	0.0598	-0.6876	0.4917	0.1261	0.0349	0.9918	0.0075	-0.0068	0.0048
POAG	Noisy workplace	0	ukbb	European	SNPs from the MHC (chr6 26M~34M) region was removed for this traits	-0.029	0.0422	-0.6862	0.4926	0.0619	0.0056	1.028	0.0076	0.0029	0.0055
POAG	Former vs Current smoker	20418890	smoking_behaviour	European	SNPs from the MHC (chr6 26M~34M) region was removed for this traits	-0.0452	0.0661	-0.6851	0.4933	0.0623	0.0103	1.0009	0.0065	-0.0005	0.0047
POAG	Shortness of breath walking on level ground	0	ukbb	European	SNPs from the MHC (chr6 26M~34M) region was removed for this traits	0.0306	0.0447	0.6849	0.4934	0.0494	0.0052	1.0071	0.0066	0.0038	0.0056
POAG	Diagnoses - main ICD10: M17 Gonarthrosis [arthrosis of knee]	0	ukbb	European	SNPs from the MHC (chr6 26M~34M) region was removed for this traits	0.0337	0.0493	0.6846	0.4936	0.0141	0.0017	1.0055	0.0071	-0.0029	0.005
POAG	Pulse rate	0	ukbb	European	SNPs from the MHC (chr6 26M~34M) region was removed for this traits	0.0244	0.0356	0.6839	0.494	0.1356	0.012	1.0245	0.0141	0.009	0.0064
POAG	Forced Vital capacity(FVC)	26635082	lung_function	European	SNPs from the MHC (chr6 26M~34M) region was removed for this traits	0.0309	0.0453	0.683	0.4946	0.1466	0.0152	0.9858	0.0067	-0.0044	0.0059
POAG	Intelligence	28530673	cognitive	European	SNPs from the MHC (chr6 26M~34M) region was removed for this traits	-0.0198	0.0291	-0.6821	0.4952	0.1895	0.0103	1.0082	0.008	-0.0021	0.0052
POAG	Had major operations	0	ukbb	European	SNPs from the MHC (chr6 26M~34M) region was removed for this traits	0.0355	0.0525	0.6758	0.4992	0.0249	0.0035	1.006	0.0072	0.0033	0.0054
POAG	Fasting proinsulin	20081858	glycemic	European	Caution: using this data may yield results outside bounds due to relative low Z score of the SNP heritability of the trait; SNPs from the MHC (chr6 26M~34M) region was removed for this traits	-0.0573	0.0849	-0.6753	0.4995	0.1728	0.0889	0.9845	0.0097	0.004	0.0052
POAG	Age started oral contraceptive pill	0	ukbb	European	SNPs from the MHC (chr6 26M~34M) region was removed for this traits	-0.0273	0.0407	-0.6718	0.5017	0.0488	0.0042	1.0147	0.0074	0.0087	0.0051
POAG	Diagnoses - main ICD10: S76 Injury of muscle and tendon at hip and thigh level	0	ukbb	European	SNPs from the MHC (chr6 26M~34M) region was removed for this traits	0.0885	0.1319	0.6707	0.5024	0.0016	0.0012	0.9981	0.0064	-0.0097	0.0054
POAG	Medication for pain relief_ constipation_ heartburn: Aspirin	0	ukbb	European	SNPs from the MHC (chr6 26M~34M) region was removed for this traits	0.0317	0.0476	0.6664	0.5052	0.0211	0.0019	1.0134	0.007	0.0106	0.0052
POAG	Total lipids in small VLDL	27005778	metabolites	European	SNPs from the MHC (chr6 26M~34M) region was removed for this traits	-0.0401	0.0603	-0.6658	0.5055	0.1463	0.0371	0.9913	0.0082	-0.0067	0.0046
POAG	Illnesses of mother: Diabetes	0	ukbb	European	SNPs from the MHC (chr6 26M~34M) region was removed for this traits	0.0285	0.0428	0.6659	0.5055	0.0207	0.002	1.0161	0.0091	-0.0004	0.0058
POAG	Illness_ injury_ bereavement_ stress in last 2 years: Serious illness_ injury or assault to yourself	0	ukbb	European	SNPs from the MHC (chr6 26M~34M) region was removed for this traits	0.0297	0.0446	0.6648	0.5062	0.0142	0.0016	1.0117	0.0068	0.0118	0.005
POAG	Pulse wave peak to peak time	0	ukbb	European	SNPs from the MHC (chr6 26M~34M) region was removed for this traits	0.0314	0.0473	0.6638	0.5068	0.0397	0.0047	1.0098	0.0069	0.0117	0.0051
POAG	Years of schooling 2016	27225129	education	European	SNPs from the MHC (chr6 26M~34M) region was removed for this traits	0.0152	0.023	0.6631	0.5073	0.1271	0.0045	0.9259	0.0101	-0.0027	0.0052
POAG	Trunk fat-free mass	0	ukbb	European	SNPs from the MHC (chr6 26M~34M) region was removed for this traits	-0.0161	0.0244	-0.6627	0.5075	0.2865	0.0125	1.1378	0.0311	-0.0007	0.0093
POAG	Friendships satisfaction	0	ukbb	European	SNPs from the MHC (chr6 26M~34M) region was removed for this traits	0.0255	0.0386	0.6611	0.5085	0.0623	0.0052	0.9984	0.0072	0.001	0.0054
POAG	Triglycerides in very large VLDL	27005778	metabolites	European	SNPs from the MHC (chr6 26M~34M) region was removed for this traits	-0.0412	0.0624	-0.6598	0.5094	0.1192	0.0292	0.9812	0.0069	-0.0062	0.0048
POAG	Time spent driving	0	ukbb	European	SNPs from the MHC (chr6 26M~34M) region was removed for this traits	-0.0257	0.0391	-0.6592	0.5097	0.0424	0.0028	1.0014	0.0069	-0.0108	0.0059
POAG	Vitamin and mineral supplements: Vitamin A	0	ukbb	European	SNPs from the MHC (chr6 26M~34M) region was removed for this traits	0.058	0.0882	0.6578	0.5107	0.0037	0.0015	1.0033	0.0061	-0.0022	0.0053
POAG	Impedance of leg (right)	0	ukbb	European	SNPs from the MHC (chr6 26M~34M) region was removed for this traits	0.0161	0.0247	0.6533	0.5136	0.2402	0.0088	1.09	0.0215	0.0082	0.0081
POAG	Subjective well being	27089181	psychiatric	European	SNPs from the MHC (chr6 26M~34M) region was removed for this traits	-0.0247	0.0379	-0.6511	0.515	0.0252	0.0021	1.0005	0.0071	0.0018	0.0055
POAG	Illnesses of father: None of the above (group 2)	0	ukbb	European	SNPs from the MHC (chr6 26M~34M) region was removed for this traits	-0.0407	0.0626	-0.6497	0.5159	0.0094	0.0017	1.0016	0.0072	-0.0013	0.0049
POAG	Fathers age at death	0	ukbb	European	SNPs from the MHC (chr6 26M~34M) region was removed for this traits	0.0308	0.0475	0.6484	0.5167	0.0341	0.0031	1.0235	0.0079	0.0007	0.0063
POAG	Triglycerides in very small VLDL	27005778	metabolites	European	SNPs from the MHC (chr6 26M~34M) region was removed for this traits	-0.0404	0.0625	-0.6464	0.518	0.1387	0.0362	0.9983	0.0097	-0.0048	0.0049
POAG	Transport type for commuting to job workplace: Cycle	0	ukbb	European	SNPs from the MHC (chr6 26M~34M) region was removed for this traits	-0.0284	0.0439	-0.6462	0.5181	0.0314	0.0033	1.0158	0.0073	0.0015	0.0055
POAG	Alzheimers disease	24162737	neurological	European	SNPs from the MHC (chr6 26M~34M) region was removed for this traits	-0.0453	0.0704	-0.6441	0.5195	0.0445	0.0212	1.0661	0.0292	0.0058	0.0061
POAG	Tobacco smoking: Ex-smoker	0	ukbb	European	SNPs from the MHC (chr6 26M~34M) region was removed for this traits	0.0292	0.0455	0.6426	0.5205	0.0767	0.0081	1.0085	0.008	-0.0002	0.0056
POAG	Fasting insulin main effect	22581228	glycemic	European	SNPs from the MHC (chr6 26M~34M) region was removed for this traits	-0.0341	0.0532	-0.6412	0.5214	0.0695	0.01	1.016	0.0069	0.0042	0.005
POAG	Forced expiratory volume in 1 second (FEV1)/Forced Vital capacity(FVC)	28166213	lung_function	European	SNPs from the MHC (chr6 26M~34M) region was removed for this traits	-0.0221	0.0344	-0.6406	0.5218	0.2609	0.0203	0.9711	0.0082	-0.0018	0.0055
POAG	Non-accidental death in close genetic family	0	ukbb	European	SNPs from the MHC (chr6 26M~34M) region was removed for this traits	0.0465	0.0727	0.6404	0.5219	0.0178	0.0046	0.996	0.0064	-0.0059	0.0054
POAG	Leg fat percentage (left)	0	ukbb	European	SNPs from the MHC (chr6 26M~34M) region was removed for this traits	-0.0137	0.0214	-0.6396	0.5224	0.2081	0.0062	1.0841	0.0164	0.0081	0.0072
POAG	Non-cancer illness code_ self-reported: arthritis (nos)	0	ukbb	European	SNPs from the MHC (chr6 26M~34M) region was removed for this traits	-0.0843	0.1321	-0.6383	0.5233	0.0016	0.0013	1.0152	0.0064	-0.0172	0.0047
POAG	Illnesses of mother: Breast cancer	0	ukbb	European	SNPs from the MHC (chr6 26M~34M) region was removed for this traits	0.0411	0.0645	0.6373	0.524	0.0094	0.0019	1.007	0.008	-0.0038	0.0058
POAG	Trunk predicted mass	0	ukbb	European	SNPs from the MHC (chr6 26M~34M) region was removed for this traits	-0.0155	0.0244	-0.6366	0.5244	0.285	0.0124	1.1371	0.0309	-0.0002	0.0093
POAG	Job involves mainly walking or standing	0	ukbb	European	SNPs from the MHC (chr6 26M~34M) region was removed for this traits	-0.0184	0.029	-0.6346	0.5257	0.08	0.0046	1.0313	0.0093	0.0027	0.0056
POAG	Wheeze or whistling in the chest in last year	0	ukbb	European	SNPs from the MHC (chr6 26M~34M) region was removed for this traits	0.0186	0.0293	0.6339	0.5261	0.06	0.003	1.0315	0.0096	0.0066	0.0054
POAG	Mouth/teeth dental problems: Painful gums	0	ukbb	European	SNPs from the MHC (chr6 26M~34M) region was removed for this traits	0.0418	0.0662	0.632	0.5274	0.0069	0.0014	1.0048	0.0063	-0.0006	0.0054
POAG	Cholesterol esters in medium HDL	27005778	metabolites	European	Caution: using this data may yield results outside bounds due to relative low Z score of the SNP heritability of the trait; SNPs from the MHC (chr6 26M~34M) region was removed for this traits	0.0553	0.0881	0.6279	0.5301	0.0569	0.0281	0.9998	0.0087	-0.0014	0.0051
POAG	Basal metabolic rate	0	ukbb	European	SNPs from the MHC (chr6 26M~34M) region was removed for this traits	-0.015	0.0239	-0.6276	0.5303	0.2842	0.0112	1.1167	0.0272	-0.0032	0.009
POAG	Frequency of tenseness / restlessness in last 2 weeks	0	ukbb	European	SNPs from the MHC (chr6 26M~34M) region was removed for this traits	0.0212	0.0339	0.6251	0.5319	0.0438	0.0026	1.0146	0.0093	0.0044	0.006
POAG	Qualifications: None of the above	0	ukbb	European	SNPs from the MHC (chr6 26M~34M) region was removed for this traits	0.016	0.0256	0.6241	0.5326	0.0977	0.0039	1.0659	0.0115	-0.0031	0.0067
POAG	Creatinine	27005778	metabolites	European	SNPs from the MHC (chr6 26M~34M) region was removed for this traits	0.0357	0.0573	0.6224	0.5337	0.1147	0.0247	1.0121	0.0072	-0.0003	0.0048
POAG	Alcohol drinker status: Previous	0	ukbb	European	SNPs from the MHC (chr6 26M~34M) region was removed for this traits	-0.0276	0.0447	-0.6178	0.5367	0.0132	0.0015	1.0071	0.0064	0.0024	0.0049
POAG	Cholesterol esters in medium VLDL	27005778	metabolites	European	SNPs from the MHC (chr6 26M~34M) region was removed for this traits	-0.0351	0.0571	-0.6136	0.5395	0.1529	0.0371	0.9859	0.008	-0.0074	0.0045
POAG	Neo-conscientiousness	21173776	personality	European	Caution: using this data may yield results outside bounds due to relative low Z score of the SNP heritability of the trait; SNPs from the MHC (chr6 26M~34M) region was removed for this traits	0.0566	0.093	0.6092	0.5424	0.0718	0.0296	1.0005	0.0067	-0.0025	0.0058
POAG	Reason for glasses/contact lenses: For just reading/near work as you are getting older (called presbyopia)	0	ukbb	European	SNPs from the MHC (chr6 26M~34M) region was removed for this traits	-0.0587	0.0964	-0.6089	0.5426	0.0038	0.0017	1.1374	0.0081	-0.0724	0.0061
POAG	Hair/balding pattern: Pattern 3	0	ukbb	European	SNPs from the MHC (chr6 26M~34M) region was removed for this traits	0.0241	0.0397	0.6071	0.5438	0.0559	0.014	1.0203	0.019	-0.0039	0.0056
POAG	Urate	23263486	other	European	SNPs from the MHC (chr6 26M~34M) region was removed for this traits	-0.0185	0.0307	-0.6034	0.5463	0.1761	0.0582	0.9534	0.0487	-0.0074	0.0053
POAG	Whole body fat-free mass	0	ukbb	European	SNPs from the MHC (chr6 26M~34M) region was removed for this traits	-0.0145	0.0241	-0.6026	0.5468	0.2889	0.0119	1.13	0.0293	-0.0034	0.0091
POAG	Arm predicted mass (right)	0	ukbb	European	SNPs from the MHC (chr6 26M~34M) region was removed for this traits	-0.0143	0.0238	-0.5992	0.549	0.2646	0.0107	1.1059	0.0268	0.0006	0.0088
POAG	Qualifications: Other professional qualifications eg: nursing_ teaching	0	ukbb	European	SNPs from the MHC (chr6 26M~34M) region was removed for this traits	-0.0177	0.0297	-0.5965	0.5508	0.0471	0.0025	1.0268	0.0091	-0.0028	0.0056
POAG	Diagnoses - main ICD10: K40 Inguinal hernia	0	ukbb	European	SNPs from the MHC (chr6 26M~34M) region was removed for this traits	-0.0287	0.0483	-0.5954	0.5516	0.0183	0.0022	0.992	0.007	0.0004	0.0053
POAG	Ever had bowel cancer screening	0	ukbb	European	SNPs from the MHC (chr6 26M~34M) region was removed for this traits	0.0288	0.0484	0.5953	0.5517	0.0129	0.0016	1.0208	0.0071	-0.0205	0.005
POAG	Age at first live birth	0	ukbb	European	SNPs from the MHC (chr6 26M~34M) region was removed for this traits	-0.0175	0.0294	-0.5948	0.552	0.166	0.0075	1.0473	0.0089	0.0048	0.0064
POAG	Non-cancer illness code_ self-reported: bladder problem (not cancer)	0	ukbb	European	SNPs from the MHC (chr6 26M~34M) region was removed for this traits	0.0604	0.1017	0.5938	0.5527	0.0022	0.0013	1.0017	0.0068	-0.0002	0.0044
POAG	Ever had hysterectomy (womb removed)	0	ukbb	European	SNPs from the MHC (chr6 26M~34M) region was removed for this traits	-0.0348	0.0587	-0.592	0.5539	0.0216	0.0033	1.0055	0.0074	0.0082	0.0055
POAG	Fed-up feelings	0	ukbb	European	SNPs from the MHC (chr6 26M~34M) region was removed for this traits	0.0153	0.0259	0.5916	0.5541	0.0719	0.0032	1.0246	0.01	0.0005	0.0063
POAG	Impedance of leg (left)	0	ukbb	European	SNPs from the MHC (chr6 26M~34M) region was removed for this traits	0.0143	0.0242	0.5895	0.5556	0.2413	0.009	1.0796	0.0216	0.0078	0.0079
POAG	Crohns disease	26192919	autoimmune	European	SNPs from the MHC (chr6 26M~34M) region was removed for this traits	-0.0196	0.0334	-0.5871	0.5571	0.508	0.0581	1.0208	0.0116	0.0058	0.0051
POAG	Arm fat-free mass (right)	0	ukbb	European	SNPs from the MHC (chr6 26M~34M) region was removed for this traits	-0.0139	0.0237	-0.587	0.5572	0.2658	0.0107	1.1042	0.0268	-0.0003	0.0087
POAG	Medication for pain relief_ constipation_ heartburn: Laxatives (e.g. Dulcolax_ Senokot)	0	ukbb	European	SNPs from the MHC (chr6 26M~34M) region was removed for this traits	0.0298	0.0507	0.5869	0.5573	0.0114	0.0016	1.0095	0.0067	0.004	0.0052
POAG	Mean Caudate	25607358	brain_volume	European	SNPs from the MHC (chr6 26M~34M) region was removed for this traits	0.0309	0.0528	0.5857	0.5581	0.2497	0.0388	0.9686	0.0059	-0.0066	0.0053
POAG	Schizophrenia	25056061	psychiatric	Mixed	Caution: using this data may yield less robust results due to minor departure of the LD structure; SNPs from the MHC (chr6 26M~34M) region was removed for this traits	0.016	0.0274	0.5845	0.5589	0.4604	0.0194	1.0509	0.0131	0.0045	0.0074
POAG	Illnesses of father: Heart disease	0	ukbb	European	SNPs from the MHC (chr6 26M~34M) region was removed for this traits	0.0269	0.0463	0.5816	0.5608	0.0304	0.0026	1.0014	0.0087	-0.0039	0.0056
POAG	Eye problems/disorders: Injury or trauma resulting in loss of vision	0	ukbb	European	SNPs from the MHC (chr6 26M~34M) region was removed for this traits	0.3916	0.6781	0.5774	0.5637	0.0014	0.004	1.0103	0.0063	0.0186	0.005
POAG	Pain type(s) experienced in last month: Stomach or abdominal pain	0	ukbb	European	SNPs from the MHC (chr6 26M~34M) region was removed for this traits	0.0246	0.0427	0.5767	0.5641	0.0216	0.0017	1.0065	0.007	0.0108	0.0055
POAG	PGC cross-disorder analysis	23453885	psychiatric	European	SNPs from the MHC (chr6 26M~34M) region was removed for this traits	0.0224	0.0389	0.5766	0.5642	0.1742	0.0133	1.0116	0.0116	-0.0064	0.0082
POAG	Usual walking pace	0	ukbb	European	SNPs from the MHC (chr6 26M~34M) region was removed for this traits	-0.0139	0.0242	-0.5729	0.5667	0.0784	0.0029	1.0265	0.0098	-0.0139	0.0061
POAG	Whole body water mass	0	ukbb	European	SNPs from the MHC (chr6 26M~34M) region was removed for this traits	-0.0138	0.0241	-0.5707	0.5682	0.2889	0.0119	1.1293	0.0291	-0.0038	0.0092
POAG	Total lipids in medium HDL	27005778	metabolites	European	Caution: using this data may yield results outside bounds due to relative low Z score of the SNP heritability of the trait; SNPs from the MHC (chr6 26M~34M) region was removed for this traits	0.0482	0.0847	0.5695	0.569	0.0619	0.0261	0.9961	0.0077	-0.0026	0.0052
POAG	Heel bone mineral density (BMD) T-score_ automated	0	ukbb	European	SNPs from the MHC (chr6 26M~34M) region was removed for this traits	0.0163	0.0287	0.5694	0.5691	0.2946	0.0337	1.0858	0.0351	-0.0023	0.0084
POAG	Peak expiratory flow (PEF)	0	ukbb	European	SNPs from the MHC (chr6 26M~34M) region was removed for this traits	-0.0165	0.029	-0.5692	0.5692	0.0902	0.0046	1.0546	0.0123	-0.0166	0.0066
POAG	Average weekly spirits intake	0	ukbb	European	SNPs from the MHC (chr6 26M~34M) region was removed for this traits	0.0233	0.041	0.5677	0.5703	0.0314	0.0028	1.0173	0.0079	0.002	0.0055
POAG	Diagnoses - main ICD10: K44 Diaphragmatic hernia	0	ukbb	European	SNPs from the MHC (chr6 26M~34M) region was removed for this traits	0.0406	0.0724	0.5611	0.5748	0.0051	0.0014	1.005	0.0065	-0.0053	0.0056
POAG	Light smokers_ at least 100 smokes in lifetime	0	ukbb	European	SNPs from the MHC (chr6 26M~34M) region was removed for this traits	-0.0246	0.044	-0.5584	0.5766	0.0771	0.0074	1.0054	0.0072	0.005	0.006
POAG	Mean Thalamus	25607358	brain_volume	European	SNPs from the MHC (chr6 26M~34M) region was removed for this traits	0.0409	0.0737	0.5546	0.5792	0.1398	0.036	0.9794	0.0062	-0.0061	0.0051
POAG	Phospholipids in large VLDL	27005778	metabolites	European	SNPs from the MHC (chr6 26M~34M) region was removed for this traits	-0.0354	0.0641	-0.5517	0.5812	0.1167	0.0301	0.9892	0.0064	-0.0044	0.005
POAG	Non-cancer illness code_ self-reported: migraine	0	ukbb	European	SNPs from the MHC (chr6 26M~34M) region was removed for this traits	0.0228	0.0413	0.5512	0.5815	0.0165	0.0018	1.0123	0.0076	-0.0034	0.0051
POAG	Leg fat percentage (right)	0	ukbb	European	SNPs from the MHC (chr6 26M~34M) region was removed for this traits	-0.0119	0.0216	-0.5492	0.5829	0.2081	0.0063	1.0816	0.0168	0.0086	0.0071
POAG	Types of physical activity in last 4 weeks: Strenuous sports	0	ukbb	European	SNPs from the MHC (chr6 26M~34M) region was removed for this traits	0.0211	0.0385	0.5485	0.5834	0.0221	0.0017	1.0102	0.0071	-0.0093	0.0051
POAG	Standing height	0	ukbb	European	SNPs from the MHC (chr6 26M~34M) region was removed for this traits	0.0122	0.0224	0.5458	0.5852	0.4503	0.0223	1.2525	0.058	-0.0099	0.0107
POAG	Tinnitus: Yes_ now most or all of the time	0	ukbb	European	SNPs from the MHC (chr6 26M~34M) region was removed for this traits	0.0299	0.0556	0.5378	0.5907	0.0335	0.0046	1.0016	0.0067	-0.0022	0.0055
POAG	Number of full sisters	0	ukbb	European	SNPs from the MHC (chr6 26M~34M) region was removed for this traits	0.0227	0.0424	0.5346	0.5929	0.0186	0.0018	1.0401	0.0067	-0.0085	0.0051
POAG	Types of transport used (excluding work): Public transport	0	ukbb	European	SNPs from the MHC (chr6 26M~34M) region was removed for this traits	-0.0231	0.0436	-0.531	0.5954	0.0221	0.0018	1.0268	0.0069	0.0111	0.0061
POAG	Cough on most days	0	ukbb	European	SNPs from the MHC (chr6 26M~34M) region was removed for this traits	-0.0267	0.0504	-0.5297	0.5963	0.048	0.0065	0.9988	0.0069	0.0041	0.0049
POAG	Type 2 Diabetes	22885922	glycemic	European	SNPs from the MHC (chr6 26M~34M) region was removed for this traits	0.024	0.0454	0.5291	0.5967	0.0882	0.0093	1.0077	0.007	0.0045	0.005
POAG	Medication for pain relief_ constipation_ heartburn: Paracetamol	0	ukbb	European	SNPs from the MHC (chr6 26M~34M) region was removed for this traits	0.0169	0.032	0.5288	0.5969	0.0431	0.0024	1.0262	0.0084	0.0114	0.0062
POAG	Diagnoses - main ICD10: N92 Excessive_ frequent and irregular menstruation	0	ukbb	European	SNPs from the MHC (chr6 26M~34M) region was removed for this traits	0.038	0.0719	0.5279	0.5976	0.0071	0.0017	1.0012	0.0073	-0.0059	0.0055
POAG	Total cholesterol in small VLDL	27005778	metabolites	European	SNPs from the MHC (chr6 26M~34M) region was removed for this traits	-0.0367	0.0696	-0.5278	0.5977	0.0927	0.0317	1.0047	0.0096	-0.0072	0.0045
POAG	LDL cholesterol	20686565	lipids	European	SNPs from the MHC (chr6 26M~34M) region was removed for this traits	-0.0178	0.0339	-0.5262	0.5988	0.1042	0.0285	1.051	0.0483	0.0033	0.0054
POAG	Height_2010	20881960	anthropometric	European	SNPs from the MHC (chr6 26M~34M) region was removed for this traits	0.0147	0.0279	0.5258	0.599	0.2853	0.0163	1.0188	0.0185	-0.0084	0.0069
POAG	Free cholesterol in small VLDL	27005778	metabolites	European	SNPs from the MHC (chr6 26M~34M) region was removed for this traits	-0.0336	0.064	-0.5253	0.5994	0.1132	0.0333	0.9994	0.0086	-0.0074	0.0045
POAG	Hair/balding pattern: Pattern 4	0	ukbb	European	SNPs from the MHC (chr6 26M~34M) region was removed for this traits	0.0137	0.0261	0.5248	0.5997	0.1676	0.0193	1.0985	0.0241	0.0125	0.0061
POAG	Chest pain or discomfort	0	ukbb	European	SNPs from the MHC (chr6 26M~34M) region was removed for this traits	0.0176	0.0339	0.5198	0.6032	0.0332	0.0022	1.0173	0.0078	0.007	0.005
POAG	Diagnoses - main ICD10: M20 Acquired deformities of fingers and toes	0	ukbb	European	SNPs from the MHC (chr6 26M~34M) region was removed for this traits	0.0315	0.0606	0.5196	0.6034	0.0095	0.0015	1	0.0073	-0.0025	0.0055
POAG	Waist-to-hip ratio	25673412	anthropometric	European	SNPs from the MHC (chr6 26M~34M) region was removed for this traits	-0.0155	0.0299	-0.5169	0.6053	0.1127	0.0069	0.9216	0.0089	4.4e-05	0.0058
POAG	Duration of light DIY	0	ukbb	European	SNPs from the MHC (chr6 26M~34M) region was removed for this traits	0.0192	0.0372	0.5157	0.6061	0.0351	0.0034	1.0032	0.0072	-0.0057	0.0049
POAG	Diagnoses - main ICD10: K57 Diverticular disease of intestine	0	ukbb	European	SNPs from the MHC (chr6 26M~34M) region was removed for this traits	-0.025	0.0486	-0.514	0.6072	0.0131	0.0015	1.0037	0.0065	0.0104	0.0057
POAG	Illnesses of father: Chronic bronchitis/emphysema	0	ukbb	European	SNPs from the MHC (chr6 26M~34M) region was removed for this traits	0.0238	0.0464	0.5129	0.608	0.0148	0.0019	1.0237	0.0068	-0.0028	0.0052
POAG	Duration of vigorous activity	0	ukbb	European	SNPs from the MHC (chr6 26M~34M) region was removed for this traits	0.0217	0.0423	0.5123	0.6084	0.0361	0.0032	0.9912	0.0074	-0.004	0.005
POAG	Total cholesterol in small LDL	27005778	metabolites	European	SNPs from the MHC (chr6 26M~34M) region was removed for this traits	0.0382	0.0745	0.5122	0.6085	0.0696	0.0437	1.0164	0.0189	-0.0104	0.0047
POAG	Started insulin within one year diagnosis of diabetes	0	ukbb	European	SNPs from the MHC (chr6 26M~34M) region was removed for this traits	-0.0359	0.0701	-0.5119	0.6087	0.1645	0.0455	1.007	0.0083	0.0037	0.0056
POAG	Childhood obesity	22484627	anthropometric	European	SNPs from the MHC (chr6 26M~34M) region was removed for this traits	-0.0221	0.0433	-0.5114	0.609	0.4137	0.0456	0.9264	0.0074	0.0053	0.0048
POAG	Diagnoses - main ICD10: Z09 Follow-up examination after treatment for conditions other than malignant neoplasms	0	ukbb	European	SNPs from the MHC (chr6 26M~34M) region was removed for this traits	0.0458	0.0896	0.5107	0.6096	0.0031	0.0013	0.9993	0.0062	-0.0004	0.005
POAG	Qualifications: O levels/GCSEs or equivalent	0	ukbb	European	SNPs from the MHC (chr6 26M~34M) region was removed for this traits	0.0167	0.0328	0.5104	0.6098	0.0485	0.0025	1.0169	0.0094	0.0019	0.0059
POAG	College completion	23722424	education	European	SNPs from the MHC (chr6 26M~34M) region was removed for this traits	-0.0195	0.0385	-0.5065	0.6125	0.0793	0.0057	1.0211	0.0087	-0.0008	0.0061
POAG	Non-cancer illness code_ self-reported: back problem	0	ukbb	European	SNPs from the MHC (chr6 26M~34M) region was removed for this traits	0.0369	0.0731	0.5047	0.6138	0.005	0.0013	1.0057	0.006	-0.0022	0.0049
POAG	Asthma	17611496	autoimmune	European	SNPs from the MHC (chr6 26M~34M) region was removed for this traits	0.0346	0.0689	0.5023	0.6155	0.1101	0.0271	1.0146	0.0083	-0.0004	0.0069
POAG	Total cholesterol in IDL	27005778	metabolites	European	SNPs from the MHC (chr6 26M~34M) region was removed for this traits	0.0401	0.0801	0.5006	0.6167	0.0717	0.0454	1.0184	0.0196	-0.0095	0.0049
POAG	Birth weight of first child	0	ukbb	European	SNPs from the MHC (chr6 26M~34M) region was removed for this traits	-0.0162	0.0325	-0.5	0.6171	0.1088	0.0063	1.0231	0.0097	-0.0031	0.0056
POAG	Arm fat mass (left)	0	ukbb	European	SNPs from the MHC (chr6 26M~34M) region was removed for this traits	-0.0108	0.0218	-0.4968	0.6193	0.2318	0.0078	1.0668	0.0173	0.0007	0.0077
POAG	Guilty feelings	0	ukbb	European	SNPs from the MHC (chr6 26M~34M) region was removed for this traits	0.0161	0.0323	0.4962	0.6197	0.0512	0.0027	1.008	0.0087	-0.0035	0.0063
POAG	Exposure to tobacco smoke at home	0	ukbb	European	SNPs from the MHC (chr6 26M~34M) region was removed for this traits	0.026	0.0527	0.4943	0.6211	0.0118	0.0016	0.9986	0.0064	-0.0052	0.0054
POAG	Total lipids in chylomicrons and largest VLDL particles	27005778	metabolites	European	SNPs from the MHC (chr6 26M~34M) region was removed for this traits	-0.0327	0.0665	-0.4927	0.6222	0.1191	0.0275	0.9903	0.0066	-0.0034	0.0047
POAG	Blood clot_ DVT_ bronchitis_ emphysema_ asthma_ rhinitis_ eczema_ allergy diagnosed by doctor: Blood clot in the leg (DVT)	0	ukbb	European	SNPs from the MHC (chr6 26M~34M) region was removed for this traits	0.0264	0.0538	0.4904	0.6239	0.0106	0.0018	1.0105	0.0089	0.003	0.0053
POAG	Diagnoses - main ICD10: S52 Fracture of forearm	0	ukbb	European	SNPs from the MHC (chr6 26M~34M) region was removed for this traits	-0.0372	0.076	-0.4902	0.624	0.0065	0.0018	0.9987	0.007	0.0058	0.0059
POAG	Non-cancer illness code_ self-reported: allergy or anaphylactic reaction to drug	0	ukbb	European	SNPs from the MHC (chr6 26M~34M) region was removed for this traits	0.0769	0.1574	0.4882	0.6254	0.0011	0.0013	1.0073	0.006	0.0041	0.0053
POAG	Arm fat mass (right)	0	ukbb	European	SNPs from the MHC (chr6 26M~34M) region was removed for this traits	-0.0106	0.0219	-0.4847	0.6279	0.231	0.0078	1.0703	0.0173	6.01e-05	0.0076
POAG	Difference in height between adolescence and adulthood; age 14	23449627	anthropometric	European	SNPs from the MHC (chr6 26M~34M) region was removed for this traits	0.0335	0.0694	0.4824	0.6295	0.4526	0.108	0.9811	0.0066	-0.0049	0.0056
POAG	Leg predicted mass (right)	0	ukbb	European	SNPs from the MHC (chr6 26M~34M) region was removed for this traits	-0.0115	0.024	-0.4813	0.6303	0.2639	0.0104	1.113	0.0255	-0.0079	0.0087
POAG	Cancer code_ self-reported: small intestine/small bowel cancer	0	ukbb	European	SNPs from the MHC (chr6 26M~34M) region was removed for this traits	0.0794	0.1656	0.4792	0.6318	0.0011	0.0014	0.9991	0.0068	-0.0047	0.0049
POAG	Former alcohol drinker	0	ukbb	European	SNPs from the MHC (chr6 26M~34M) region was removed for this traits	-0.0299	0.0629	-0.4762	0.6339	0.1232	0.0214	0.9964	0.0062	-0.0024	0.005
POAG	Multiple sclerosis	21833088	autoimmune	European	Caution: using this data may yield results outside bounds due to relative low Z score of the SNP heritability of the trait; SNPs from the MHC (chr6 26M~34M) region was removed for this traits	-0.0439	0.0926	-0.4744	0.6352	0.0576	0.0276	1.0582	0.0089	0.0094	0.0062
POAG	Concentration of medium HDL particles	27005778	metabolites	European	Caution: using this data may yield results outside bounds due to relative low Z score of the SNP heritability of the trait; SNPs from the MHC (chr6 26M~34M) region was removed for this traits	0.0389	0.0825	0.4718	0.6371	0.0652	0.026	0.9947	0.0074	-0.0028	0.0053
POAG	Cholesterol esters in medium LDL	27005778	metabolites	European	SNPs from the MHC (chr6 26M~34M) region was removed for this traits	0.0348	0.0741	0.4703	0.6381	0.0802	0.0494	1.0101	0.0206	-0.0093	0.0048
POAG	Concentration of medium LDL particles	27005778	metabolites	European	SNPs from the MHC (chr6 26M~34M) region was removed for this traits	0.0345	0.0734	0.4693	0.6389	0.0792	0.0486	1.0118	0.0199	-0.0096	0.0047
POAG	Concentration of small LDL particles	27005778	metabolites	European	SNPs from the MHC (chr6 26M~34M) region was removed for this traits	0.0317	0.0677	0.4681	0.6397	0.093	0.0435	1.0074	0.0158	-0.0101	0.0046
POAG	Worry too long after embarrassment	0	ukbb	European	SNPs from the MHC (chr6 26M~34M) region was removed for this traits	0.0136	0.0291	0.4672	0.6404	0.0651	0.0034	1.0169	0.01	-0.0086	0.0058
POAG	Alanine	27005778	metabolites	European	SNPs from the MHC (chr6 26M~34M) region was removed for this traits	0.028	0.0602	0.4655	0.6415	0.0841	0.027	1.0118	0.0073	-0.0047	0.0043
POAG	Triglycerides in chylomicrons and largest VLDL particles	27005778	metabolites	European	SNPs from the MHC (chr6 26M~34M) region was removed for this traits	-0.032	0.0688	-0.4653	0.6417	0.091	0.0272	0.9907	0.0064	-0.0039	0.0047
POAG	Leg fat mass (left)	0	ukbb	European	SNPs from the MHC (chr6 26M~34M) region was removed for this traits	-0.0101	0.0217	-0.4642	0.6425	0.2316	0.0076	1.0708	0.0172	0.0031	0.0077
POAG	Total lipids in small LDL	27005778	metabolites	European	SNPs from the MHC (chr6 26M~34M) region was removed for this traits	0.0322	0.0695	0.4633	0.6432	0.0861	0.0456	1.0082	0.0175	-0.01	0.0046
POAG	Fractured bone site(s): Wrist	0	ukbb	European	SNPs from the MHC (chr6 26M~34M) region was removed for this traits	-0.0328	0.0711	-0.4619	0.6441	0.0065	0.0016	1.0084	0.0069	0.0011	0.0053
POAG	Leg fat-free mass (right)	0	ukbb	European	SNPs from the MHC (chr6 26M~34M) region was removed for this traits	-0.0111	0.024	-0.4613	0.6446	0.2642	0.0104	1.1133	0.0255	-0.008	0.0087
POAG	Home area population density - urban or rural: England/Wales - Village - less sparse	0	ukbb	European	SNPs from the MHC (chr6 26M~34M) region was removed for this traits	0.0529	0.1148	0.4609	0.6448	0.0022	0.0014	1.0243	0.0063	0.0003	0.0055
POAG	Isoleucine	27005778	metabolites	European	SNPs from the MHC (chr6 26M~34M) region was removed for this traits	-0.0308	0.067	-0.4604	0.6453	0.0729	0.023	0.9936	0.0066	-0.0006	0.0042
POAG	Number of days/week of moderate physical activity 10+ minutes	0	ukbb	European	SNPs from the MHC (chr6 26M~34M) region was removed for this traits	-0.0154	0.0335	-0.4583	0.6467	0.0419	0.0025	1.0127	0.0079	-0.0035	0.0057
POAG	Leg fat mass (right)	0	ukbb	European	SNPs from the MHC (chr6 26M~34M) region was removed for this traits	-0.01	0.0217	-0.4584	0.6467	0.2305	0.0076	1.0703	0.0173	0.0037	0.0077
POAG	Diagnoses - main ICD10: I84 Haemorrhoids	0	ukbb	European	SNPs from the MHC (chr6 26M~34M) region was removed for this traits	-0.0253	0.0552	-0.4583	0.6467	0.0094	0.0016	1.0015	0.0073	0.0015	0.0051
POAG	Total lipids in medium LDL	27005778	metabolites	European	SNPs from the MHC (chr6 26M~34M) region was removed for this traits	0.033	0.0723	0.4563	0.6482	0.0809	0.0496	1.01	0.0205	-0.0093	0.0047
POAG	Duration walking for pleasure	0	ukbb	European	SNPs from the MHC (chr6 26M~34M) region was removed for this traits	-0.0205	0.0449	-0.4558	0.6486	0.0255	0.0023	1.0109	0.0068	-0.0031	0.0056
POAG	Age at last live birth	0	ukbb	European	SNPs from the MHC (chr6 26M~34M) region was removed for this traits	-0.0156	0.0344	-0.4541	0.6497	0.0883	0.0059	1.0173	0.0081	0.002	0.0059
POAG	Free cholesterol in IDL	27005778	metabolites	European	SNPs from the MHC (chr6 26M~34M) region was removed for this traits	0.0341	0.0751	0.4535	0.6502	0.071	0.0408	1.0199	0.0197	-0.0086	0.0046
POAG	Duration of fitness test	0	ukbb	European	SNPs from the MHC (chr6 26M~34M) region was removed for this traits	-0.0417	0.0928	-0.4496	0.653	0.0201	0.009	1.0046	0.0065	0.0048	0.0048
POAG	Waist circumference	0	ukbb	European	SNPs from the MHC (chr6 26M~34M) region was removed for this traits	-0.0097	0.0217	-0.4488	0.6535	0.2003	0.007	1.0613	0.0164	0.0012	0.0072
POAG	Diagnoses - main ICD10: R35 Polyuria	0	ukbb	European	SNPs from the MHC (chr6 26M~34M) region was removed for this traits	-0.0452	0.1013	-0.4464	0.6553	0.0029	0.0015	0.9987	0.0067	-0.0006	0.0055
POAG	HOMA-IR	20081858	glycemic	European	SNPs from the MHC (chr6 26M~34M) region was removed for this traits	0.0291	0.0653	0.4456	0.6559	0.0684	0.0125	1.0032	0.0065	-0.004	0.0053
POAG	Acetate	27005778	metabolites	European	Caution: using this data may yield results outside bounds due to relative low Z score of the SNP heritability of the trait; SNPs from the MHC (chr6 26M~34M) region was removed for this traits	0.0407	0.0914	0.4455	0.656	0.0542	0.0194	1.0023	0.0068	0.0004	0.0046
POAG	Years of schooling (proxy cognitive performance)	25201988	education	European	SNPs from the MHC (chr6 26M~34M) region was removed for this traits	-0.0166	0.0374	-0.4439	0.6571	0.1069	0.0075	1.0268	0.0092	-0.0009	0.0065
POAG	Falls in the last year	0	ukbb	European	SNPs from the MHC (chr6 26M~34M) region was removed for this traits	0.0151	0.034	0.4434	0.6575	0.0327	0.0021	1.0037	0.0075	0.0095	0.0055
POAG	Non-cancer illness code_ self-reported: enlarged prostate	0	ukbb	European	SNPs from the MHC (chr6 26M~34M) region was removed for this traits	0.0257	0.058	0.4427	0.658	0.0062	0.0015	1.0044	0.0066	0.0009	0.0046
POAG	Leg predicted mass (left)	0	ukbb	European	SNPs from the MHC (chr6 26M~34M) region was removed for this traits	-0.0104	0.0236	-0.4425	0.6581	0.2661	0.0103	1.1057	0.0247	-0.0077	0.0086
POAG	Leg fat-free mass (left)	0	ukbb	European	SNPs from the MHC (chr6 26M~34M) region was removed for this traits	-0.0103	0.0237	-0.4367	0.6623	0.2665	0.0104	1.106	0.0249	-0.0079	0.0086
POAG	Cholesterol esters in large LDL	27005778	metabolites	European	SNPs from the MHC (chr6 26M~34M) region was removed for this traits	0.0325	0.0757	0.4301	0.6672	0.0763	0.0505	1.0122	0.0216	-0.0091	0.0048
POAG	Forced vital capacity	0	lung_function	European	SNPs from the MHC (chr6 26M~34M) region was removed for this traits	-0.0161	0.0375	-0.4293	0.6677	0.1176	0.0093	1.0003	0.0083	-0.0013	0.0055
POAG	Serumurate overweight	25811787	uric_acid	European	Caution: using this data may yield results outside bounds due to relative low Z score of the SNP heritability of the trait; SNPs from the MHC (chr6 26M~34M) region was removed for this traits	0.0182	0.0425	0.4288	0.6681	0.5138	0.292	0.9712	0.0256	-0.0011	0.0046
POAG	Diagnoses - main ICD10: L03 Cellulitis	0	ukbb	European	SNPs from the MHC (chr6 26M~34M) region was removed for this traits	0.035	0.0821	0.4264	0.6698	0.0038	0.0015	1.0034	0.0069	-0.0006	0.0049
POAG	Mothers age at death	0	ukbb	European	SNPs from the MHC (chr6 26M~34M) region was removed for this traits	0.0226	0.0532	0.425	0.6709	0.024	0.003	1.0292	0.0078	0.0029	0.0061
POAG	Peak expiratory flow	0	lung_function	European	SNPs from the MHC (chr6 26M~34M) region was removed for this traits	-0.0251	0.0595	-0.422	0.673	0.0969	0.0204	0.9711	0.0068	0.0006	0.0051
POAG	Arm fat percentage (right)	0	ukbb	European	SNPs from the MHC (chr6 26M~34M) region was removed for this traits	-0.0089	0.0213	-0.421	0.6738	0.2158	0.0069	1.0785	0.0175	-0.0003	0.007
POAG	No-wear time bias adjusted acceleration standard deviation	0	ukbb	European	SNPs from the MHC (chr6 26M~34M) region was removed for this traits	-0.0163	0.0393	-0.4165	0.677	0.0892	0.008	1.0014	0.0076	-0.0063	0.0053
POAG	Diagnoses - main ICD10: K30 Dyspepsia	0	ukbb	European	SNPs from the MHC (chr6 26M~34M) region was removed for this traits	-0.0364	0.0878	-0.415	0.6782	0.0031	0.0014	1.0041	0.0064	0.005	0.0054
POAG	Extreme waist-to-hip ratio	23563607	anthropometric	European	SNPs from the MHC (chr6 26M~34M) region was removed for this traits	-0.028	0.0677	-0.4131	0.6796	0.3625	0.0579	0.9769	0.0086	0.0007	0.0075
POAG	Illness_ injury_ bereavement_ stress in last 2 years: Financial difficulties	0	ukbb	European	SNPs from the MHC (chr6 26M~34M) region was removed for this traits	-0.0142	0.0346	-0.412	0.6803	0.0332	0.0022	1.0275	0.0082	0.0037	0.0057
POAG	Diagnoses - main ICD10: K51 Ulcerative colitis	0	ukbb	European	SNPs from the MHC (chr6 26M~34M) region was removed for this traits	0.0311	0.0756	0.4115	0.6807	0.0048	0.0016	1.0124	0.0068	-0.0016	0.0052
POAG	Acetoacetate	27005778	metabolites	European	Caution: using this data may yield results outside bounds due to relative low Z score of the SNP heritability of the trait; SNPs from the MHC (chr6 26M~34M) region was removed for this traits	0.032	0.0778	0.4111	0.681	0.073	0.0279	0.9803	0.0072	0.0084	0.0051
POAG	Diagnoses - main ICD10: F43 Reaction to severe stress_ and adjustment disorders	0	ukbb	European	SNPs from the MHC (chr6 26M~34M) region was removed for this traits	0.0975	0.2373	0.4111	0.681	0.0007	0.0013	1.0032	0.0057	-0.004	0.0056
POAG	Phospholipids in small VLDL	27005778	metabolites	European	SNPs from the MHC (chr6 26M~34M) region was removed for this traits	-0.0259	0.0633	-0.4084	0.683	0.1181	0.0346	0.9978	0.0084	-0.0067	0.0048
POAG	Non-cancer illness code_ self-reported: anxiety/panic attacks	0	ukbb	European	SNPs from the MHC (chr6 26M~34M) region was removed for this traits	-0.0244	0.0598	-0.4074	0.6837	0.0061	0.0012	1.0003	0.0059	-0.0001	0.005
POAG	Weight	0	ukbb	European	SNPs from the MHC (chr6 26M~34M) region was removed for this traits	-0.0092	0.0226	-0.4052	0.6853	0.265	0.0094	1.0856	0.0214	-0.0025	0.0084
POAG	Cancer code_ self-reported: prostate cancer	0	ukbb	European	SNPs from the MHC (chr6 26M~34M) region was removed for this traits	-0.026	0.0645	-0.4036	0.6865	0.0061	0.0015	1.0147	0.0074	0.0037	0.005
POAG	Current employment status: Retired	0	ukbb	European	SNPs from the MHC (chr6 26M~34M) region was removed for this traits	0.025	0.0624	0.3999	0.6893	0.0084	0.0015	1.0167	0.0071	0.0058	0.0052
POAG	Average weekly intake of other alcoholic drinks	0	ukbb	European	SNPs from the MHC (chr6 26M~34M) region was removed for this traits	0.0437	0.1093	0.3995	0.6895	0.0081	0.0059	1.0033	0.0064	0.0011	0.0051
POAG	Had menopause	0	ukbb	European	SNPs from the MHC (chr6 26M~34M) region was removed for this traits	-0.0208	0.0525	-0.3971	0.6913	0.02	0.004	1.0046	0.0069	0.0053	0.0052
POAG	Total lipids in large LDL	27005778	metabolites	European	SNPs from the MHC (chr6 26M~34M) region was removed for this traits	0.0301	0.0759	0.3967	0.6916	0.0749	0.051	1.0145	0.0218	-0.0093	0.0048
POAG	FEV1/FVC	0	lung_function	European	SNPs from the MHC (chr6 26M~34M) region was removed for this traits	-0.009	0.0229	-0.3939	0.6937	0.1928	0.0115	0.9363	0.0204	-0.0054	0.0066
POAG	Obesity class 2	23563607	anthropometric	European	SNPs from the MHC (chr6 26M~34M) region was removed for this traits	-0.0144	0.0368	-0.3913	0.6956	0.1844	0.0122	1.0018	0.0099	-0.0045	0.0079
POAG	Non-cancer illness code_ self-reported: high cholesterol	0	ukbb	European	SNPs from the MHC (chr6 26M~34M) region was removed for this traits	0.0145	0.0371	0.3912	0.6956	0.0404	0.0055	1.056	0.0276	-0.0016	0.0056
POAG	Non-cancer illness code_ self-reported: ulcerative colitis	0	ukbb	European	SNPs from the MHC (chr6 26M~34M) region was removed for this traits	-0.0265	0.068	-0.3899	0.6966	0.006	0.0017	1.0102	0.008	0.0036	0.0047
POAG	Average weekly red wine intake	0	ukbb	European	SNPs from the MHC (chr6 26M~34M) region was removed for this traits	0.0125	0.0326	0.3844	0.7006	0.0564	0.0035	1.013	0.0077	-0.0002	0.0057
POAG	Diagnoses - main ICD10: J34 Other disorders of nose and nasal sinuses	0	ukbb	European	SNPs from the MHC (chr6 26M~34M) region was removed for this traits	-0.0404	0.1052	-0.384	0.701	0.0025	0.0014	1.0074	0.0065	0.0045	0.0053
POAG	Total lipids in very small VLDL	27005778	metabolites	European	SNPs from the MHC (chr6 26M~34M) region was removed for this traits	-0.026	0.0684	-0.3803	0.7037	0.1073	0.0357	1.0095	0.0127	-0.0066	0.0049
POAG	Forced expiratory volume in 1 second (FEV1)	26635082	lung_function	European	SNPs from the MHC (chr6 26M~34M) region was removed for this traits	-0.0174	0.0459	-0.3792	0.7045	0.1407	0.0159	0.9919	0.0067	0.0002	0.0057
POAG	Diagnoses - main ICD10: B37 Candidiasis	0	ukbb	European	SNPs from the MHC (chr6 26M~34M) region was removed for this traits	-0.1497	0.397	-0.3771	0.7061	0.0005	0.0014	1.0019	0.0064	0.0067	0.0058
POAG	Fractured/broken bones in last 5 years	0	ukbb	European	SNPs from the MHC (chr6 26M~34M) region was removed for this traits	-0.0165	0.0437	-0.377	0.7062	0.0187	0.0021	1.0083	0.0075	0.0065	0.0049
POAG	Tinnitus: Yes_ but not now_ but have in the past	0	ukbb	European	SNPs from the MHC (chr6 26M~34M) region was removed for this traits	0.0252	0.0673	0.3749	0.7077	0.0181	0.0044	0.9919	0.0062	0.0027	0.005
POAG	Sodium in urine	0	ukbb	European	SNPs from the MHC (chr6 26M~34M) region was removed for this traits	-0.0108	0.029	-0.3731	0.7091	0.0713	0.0031	1.0292	0.0097	0.0078	0.0068
POAG	Concentration of large LDL particles	27005778	metabolites	European	SNPs from the MHC (chr6 26M~34M) region was removed for this traits	0.0281	0.0759	0.3705	0.711	0.0751	0.0499	1.0159	0.0212	-0.0092	0.0047
POAG	Diagnoses - main ICD10: K76 Other diseases of liver	0	ukbb	European	SNPs from the MHC (chr6 26M~34M) region was removed for this traits	-0.0321	0.0875	-0.3668	0.7137	0.0037	0.0013	0.9926	0.0062	0.0065	0.0049
POAG	Free cholesterol in large LDL	27005778	metabolites	European	SNPs from the MHC (chr6 26M~34M) region was removed for this traits	0.0297	0.0813	0.3657	0.7146	0.064	0.0477	1.0169	0.0232	-0.0092	0.0048
POAG	Number of trend entries	0	ukbb	European	SNPs from the MHC (chr6 26M~34M) region was removed for this traits	-0.0264	0.0724	-0.3644	0.7156	0.0318	0.0092	1.0053	0.0066	0.0049	0.005
POAG	Forced expiratory volume in 1-second (FEV1)_ predicted	0	ukbb	European	SNPs from the MHC (chr6 26M~34M) region was removed for this traits	0.0116	0.0318	0.3641	0.7158	0.1718	0.0122	1.0396	0.0119	-0.0073	0.0063
POAG	Pain type(s) experienced in last month: Neck or shoulder pain	0	ukbb	European	SNPs from the MHC (chr6 26M~34M) region was removed for this traits	0.0128	0.0355	0.361	0.7181	0.033	0.0019	1.0248	0.0074	0.0053	0.0056
POAG	Diagnoses - main ICD10: N81 Female genital prolapse	0	ukbb	European	SNPs from the MHC (chr6 26M~34M) region was removed for this traits	0.0225	0.0631	0.3566	0.7214	0.0072	0.0015	1.0247	0.0066	-0.0008	0.005
POAG	Total lipids in small HDL	27005778	metabolites	European	Caution: using this data may yield results outside bounds due to relative low Z score of the SNP heritability of the trait; SNPs from the MHC (chr6 26M~34M) region was removed for this traits	-0.0323	0.0905	-0.3565	0.7215	0.0545	0.0265	1.0024	0.0074	0.0005	0.0047
POAG	Apolipoprotein B	27005778	metabolites	European	SNPs from the MHC (chr6 26M~34M) region was removed for this traits	-0.0248	0.0697	-0.3554	0.7223	0.0834	0.0398	1.0083	0.0145	-0.007	0.0045
POAG	Back pain for 3+ months	0	ukbb	European	SNPs from the MHC (chr6 26M~34M) region was removed for this traits	0.0195	0.0549	0.3552	0.7225	0.0403	0.0057	0.9915	0.0067	0.0082	0.0054
POAG	Total cholesterol in LDL	27005778	metabolites	European	SNPs from the MHC (chr6 26M~34M) region was removed for this traits	0.0269	0.0758	0.3543	0.7231	0.0685	0.0502	1.0138	0.0235	-0.0088	0.0048
POAG	Diagnoses - main ICD10: R31 Unspecified haematuria	0	ukbb	European	SNPs from the MHC (chr6 26M~34M) region was removed for this traits	0.0349	0.0988	0.3533	0.7239	0.0033	0.0015	1.0073	0.0063	0.0095	0.0055
POAG	Pain type(s) experienced in last month: Knee pain	0	ukbb	European	SNPs from the MHC (chr6 26M~34M) region was removed for this traits	0.0109	0.031	0.3524	0.7246	0.0407	0.0023	1.0139	0.0084	-0.0006	0.0053
POAG	Total cholesterol in medium LDL	27005778	metabolites	European	SNPs from the MHC (chr6 26M~34M) region was removed for this traits	0.0269	0.0766	0.3506	0.7259	0.0686	0.0465	1.013	0.0218	-0.0083	0.0049
POAG	Neo-openness to experience	21173776	personality	European	SNPs from the MHC (chr6 26M~34M) region was removed for this traits	-0.0245	0.0709	-0.3454	0.7298	0.1049	0.0271	0.9922	0.0066	0.0079	0.0052
POAG	Hair/balding pattern: Pattern 2	0	ukbb	European	SNPs from the MHC (chr6 26M~34M) region was removed for this traits	0.0147	0.0429	0.3435	0.7312	0.0517	0.0065	1.0346	0.0133	-0.0013	0.0057
POAG	Duration of moderate activity	0	ukbb	European	SNPs from the MHC (chr6 26M~34M) region was removed for this traits	-0.0135	0.0394	-0.3424	0.7321	0.0318	0.0023	1.0095	0.0075	0.0046	0.0052
POAG	Sleeplessness / insomnia	0	ukbb	European	SNPs from the MHC (chr6 26M~34M) region was removed for this traits	-0.0093	0.0271	-0.3422	0.7322	0.0624	0.0027	1.018	0.0085	0.0074	0.0056
POAG	Triglycerides in IDL	27005778	metabolites	European	SNPs from the MHC (chr6 26M~34M) region was removed for this traits	-0.0234	0.0687	-0.3409	0.7332	0.1074	0.0345	1.0107	0.015	-0.0052	0.0049
POAG	Diagnoses - main ICD10: I48 Atrial fibrillation and flutter	0	ukbb	European	SNPs from the MHC (chr6 26M~34M) region was removed for this traits	-0.0168	0.0494	-0.3408	0.7333	0.0128	0.0021	1.0111	0.008	0.0015	0.0055
POAG	Diagnoses - main ICD10: R10 Abdominal and pelvic pain	0	ukbb	European	SNPs from the MHC (chr6 26M~34M) region was removed for this traits	-0.0163	0.048	-0.3383	0.7351	0.0121	0.0017	0.9961	0.0073	0.0026	0.0051
POAG	Fluid intelligence score	0	ukbb	European	SNPs from the MHC (chr6 26M~34M) region was removed for this traits	0.009	0.0267	0.337	0.7361	0.2378	0.0106	1.0428	0.0102	-0.0018	0.0061
POAG	Non-cancer illness code_ self-reported: bone disorder	0	ukbb	European	SNPs from the MHC (chr6 26M~34M) region was removed for this traits	0.0379	0.1125	0.3366	0.7364	0.0018	0.0012	1.0038	0.0061	0.0027	0.0048
POAG	Potassium in urine	0	ukbb	European	SNPs from the MHC (chr6 26M~34M) region was removed for this traits	-0.011	0.0328	-0.3348	0.7377	0.0428	0.0023	1.0169	0.0086	0.0102	0.0059
POAG	Non-cancer illness code_ self-reported: osteoarthritis	0	ukbb	European	SNPs from the MHC (chr6 26M~34M) region was removed for this traits	-0.0154	0.0464	-0.3325	0.7395	0.0189	0.0017	1.0279	0.0074	0.014	0.0055
POAG	Financial situation satisfaction	0	ukbb	European	SNPs from the MHC (chr6 26M~34M) region was removed for this traits	0.0137	0.0414	0.3301	0.7414	0.0574	0.0061	1.0056	0.008	0.0014	0.0052
POAG	Cancer code_ self-reported: breast cancer	0	ukbb	European	SNPs from the MHC (chr6 26M~34M) region was removed for this traits	0.0193	0.0588	0.3288	0.7423	0.0099	0.0018	1.0182	0.0078	0.0016	0.005
POAG	Glycoprotein acetyls; mainly a1-acid glycoprotein	27005778	metabolites	European	SNPs from the MHC (chr6 26M~34M) region was removed for this traits	-0.0223	0.0694	-0.3215	0.7478	0.1015	0.0289	0.9851	0.0062	-0.0087	0.0047
POAG	Fractured bone site(s): Arm	0	ukbb	European	SNPs from the MHC (chr6 26M~34M) region was removed for this traits	-0.0232	0.0732	-0.3173	0.751	0.0052	0.0015	0.9968	0.0068	0.0101	0.0054
POAG	Hip circumference	0	ukbb	European	SNPs from the MHC (chr6 26M~34M) region was removed for this traits	-0.0072	0.0227	-0.3168	0.7514	0.2175	0.0082	1.0802	0.0189	0.0005	0.0077
POAG	Frequency of depressed mood in last 2 weeks	0	ukbb	European	SNPs from the MHC (chr6 26M~34M) region was removed for this traits	-0.0099	0.0315	-0.3154	0.7525	0.0422	0.0028	1.0124	0.0085	0.007	0.0056
POAG	Number of unsuccessful stop-smoking attempts	0	ukbb	European	SNPs from the MHC (chr6 26M~34M) region was removed for this traits	0.0181	0.0578	0.3128	0.7544	0.0505	0.0072	1.0061	0.0068	0.0003	0.0053
POAG	Extreme bmi	23563607	anthropometric	European	SNPs from the MHC (chr6 26M~34M) region was removed for this traits	0.0135	0.0432	0.3118	0.7552	0.6918	0.0547	1.0298	0.0113	-0.0156	0.0086
POAG	Systemic lupus erythematosus	26502338	autoimmune	European	SNPs from the MHC (chr6 26M~34M) region was removed for this traits	-0.0172	0.0552	-0.3115	0.7554	0.3911	0.0668	1.1051	0.0097	0.0083	0.0062
POAG	Concentration of very small VLDL particles	27005778	metabolites	European	SNPs from the MHC (chr6 26M~34M) region was removed for this traits	-0.0203	0.0652	-0.3112	0.7556	0.1164	0.0357	1.0052	0.0123	-0.0065	0.0049
POAG	Fractured bone site(s): Other bones	0	ukbb	European	SNPs from the MHC (chr6 26M~34M) region was removed for this traits	0.0184	0.0592	0.3109	0.7559	0.009	0.0017	1.001	0.0068	-0.0009	0.0046
POAG	Depressive symptoms	27089181	psychiatric	European	SNPs from the MHC (chr6 26M~34M) region was removed for this traits	0.0132	0.0423	0.3108	0.756	0.0474	0.0037	1.0001	0.007	0.0026	0.0059
POAG	Illness_ injury_ bereavement_ stress in last 2 years: None of the above	0	ukbb	European	SNPs from the MHC (chr6 26M~34M) region was removed for this traits	-0.0131	0.0422	-0.3095	0.7569	0.0231	0.0016	1.0119	0.0061	-0.0039	0.0058
POAG	Diagnoses - main ICD10: R04 Haemorrhage from respiratory passages	0	ukbb	European	SNPs from the MHC (chr6 26M~34M) region was removed for this traits	-0.0348	0.1125	-0.3093	0.7571	0.0026	0.0015	0.9969	0.0064	0.008	0.0062
POAG	Hearing difficulty/problems: Yes	0	ukbb	European	SNPs from the MHC (chr6 26M~34M) region was removed for this traits	-0.0096	0.0314	-0.306	0.7596	0.0416	0.0024	1.0147	0.0089	-0.0025	0.006
POAG	Father still alive	0	ukbb	European	SNPs from the MHC (chr6 26M~34M) region was removed for this traits	-0.0204	0.0678	-0.301	0.7634	0.0064	0.0015	1.0163	0.0065	-0.0028	0.0054
POAG	Non-cancer illness code_ self-reported: deep venous thrombosis (dvt)	0	ukbb	European	SNPs from the MHC (chr6 26M~34M) region was removed for this traits	0.0159	0.0532	0.299	0.765	0.011	0.0018	1.0085	0.0089	0.0044	0.0054
POAG	Types of physical activity in last 4 weeks: Light DIY (eg: pruning_ watering the lawn)	0	ukbb	European	SNPs from the MHC (chr6 26M~34M) region was removed for this traits	0.01	0.0335	0.2981	0.7656	0.0388	0.0022	1.0059	0.0081	-0.0033	0.0059
POAG	Non-cancer illness code_ self-reported: kidney stone/ureter stone/bladder stone	0	ukbb	European	SNPs from the MHC (chr6 26M~34M) region was removed for this traits	-0.0175	0.0591	-0.2956	0.7675	0.009	0.0017	1.0026	0.0076	0.0046	0.0054
POAG	Diagnoses - main ICD10: M67 Other disorders of synovium and tendon	0	ukbb	European	SNPs from the MHC (chr6 26M~34M) region was removed for this traits	0.033	0.1119	0.295	0.768	0.0022	0.0013	0.9987	0.0062	-0.0002	0.0048
POAG	Non-cancer illness code_ self-reported: gout	0	ukbb	European	SNPs from the MHC (chr6 26M~34M) region was removed for this traits	-0.0117	0.0398	-0.2944	0.7684	0.0248	0.0067	0.9923	0.019	0.0003	0.0051
POAG	Transferrin	25352340	metal	European	Caution: using this data may yield results outside bounds due to relative low Z score of the SNP heritability of the trait; SNPs from the MHC (chr6 26M~34M) region was removed for this traits	0.0174	0.06	0.2904	0.7715	0.1636	0.0764	1.0612	0.0235	0.0022	0.0073
POAG	Diagnoses - main ICD10: I20 Angina pectoris	0	ukbb	European	SNPs from the MHC (chr6 26M~34M) region was removed for this traits	-0.0188	0.0649	-0.2893	0.7724	0.0082	0.0015	1.0099	0.007	0.0046	0.005
POAG	Free cholesterol in medium HDL	27005778	metabolites	European	SNPs from the MHC (chr6 26M~34M) region was removed for this traits	0.0226	0.0794	0.2851	0.7756	0.0678	0.0233	0.9975	0.0081	-0.0041	0.0053
POAG	Maximum workload during fitness test	0	ukbb	European	SNPs from the MHC (chr6 26M~34M) region was removed for this traits	-0.0167	0.0588	-0.2834	0.7769	0.0432	0.0101	1.0071	0.007	0.0088	0.0047
POAG	Phospholipids in medium LDL	27005778	metabolites	European	SNPs from the MHC (chr6 26M~34M) region was removed for this traits	0.0199	0.0722	0.2762	0.7824	0.073	0.0422	1.0083	0.0189	-0.008	0.0047
POAG	Total lipids in IDL	27005778	metabolites	European	SNPs from the MHC (chr6 26M~34M) region was removed for this traits	0.0213	0.078	0.2736	0.7844	0.0738	0.0441	1.0189	0.0187	-0.0089	0.0049
POAG	Sitting height	0	ukbb	European	SNPs from the MHC (chr6 26M~34M) region was removed for this traits	0.0064	0.0236	0.2732	0.7847	0.3214	0.0181	1.1375	0.0422	-0.0069	0.0099
POAG	Job involves heavy manual or physical work	0	ukbb	European	SNPs from the MHC (chr6 26M~34M) region was removed for this traits	-0.0079	0.0288	-0.2729	0.7849	0.0871	0.0046	1.0363	0.0091	-0.0008	0.0058
POAG	Diagnoses - main ICD10: M16 Coxarthrosis [arthrosis of hip]	0	ukbb	European	SNPs from the MHC (chr6 26M~34M) region was removed for this traits	0.0177	0.0649	0.2723	0.7854	0.0107	0.0018	1.0102	0.008	0.0027	0.0058
POAG	Arm fat percentage (left)	0	ukbb	European	SNPs from the MHC (chr6 26M~34M) region was removed for this traits	-0.0057	0.0211	-0.2697	0.7874	0.2194	0.0071	1.0733	0.0178	-0.0007	0.0071
POAG	Average weekly champagne plus white wine intake	0	ukbb	European	SNPs from the MHC (chr6 26M~34M) region was removed for this traits	0.0115	0.0428	0.2696	0.7875	0.0307	0.0027	1.0406	0.0077	0.0013	0.0054
POAG	Diagnoses - main ICD10: R07 Pain in throat and chest	0	ukbb	European	SNPs from the MHC (chr6 26M~34M) region was removed for this traits	0.0114	0.0424	0.2695	0.7875	0.0164	0.0017	1.0049	0.0075	0.0021	0.0049
POAG	Time spent using computer	0	ukbb	European	SNPs from the MHC (chr6 26M~34M) region was removed for this traits	-0.007	0.0263	-0.2669	0.7896	0.0962	0.0042	1.045	0.0093	-0.0035	0.0061
POAG	Total Cholesterol	20686565	lipids	European	SNPs from the MHC (chr6 26M~34M) region was removed for this traits	-0.0081	0.0306	-0.2662	0.7901	0.1339	0.0241	1.0212	0.0348	-0.0002	0.0057
POAG	Mean Accumbens	25607358	brain_volume	European	Caution: using this data may yield results outside bounds due to relative low Z score of the SNP heritability of the trait; SNPs from the MHC (chr6 26M~34M) region was removed for this traits	0.0241	0.0911	0.2646	0.7913	0.0903	0.0363	0.9795	0.0065	-0.0004	0.005
POAG	Ratio of bisallylic groups to total fatty acids	27005778	metabolites	European	Caution: using this data may yield results outside bounds due to relative low Z score of the SNP heritability of the trait; SNPs from the MHC (chr6 26M~34M) region was removed for this traits	0.0138	0.0531	0.2593	0.7954	0.2746	0.1001	0.9858	0.0076	0.0021	0.0052
POAG	Medication for cholesterol_ blood pressure_ diabetes_ or take exogenous hormones: None of the above	0	ukbb	European	SNPs from the MHC (chr6 26M~34M) region was removed for this traits	-0.0095	0.0371	-0.257	0.7972	0.0661	0.0044	1.0178	0.0086	-0.0085	0.0057
POAG	Age of first birth	27798627	reproductive	European	SNPs from the MHC (chr6 26M~34M) region was removed for this traits	-0.0078	0.0304	-0.2565	0.7975	0.0625	0.0035	0.9533	0.0078	-0.0014	0.0051
POAG	Non-cancer illness code_ self-reported: nasal polyps	0	ukbb	European	SNPs from the MHC (chr6 26M~34M) region was removed for this traits	-0.0179	0.0698	-0.2559	0.798	0.0051	0.0016	1.0069	0.0066	0.0086	0.0054
POAG	Pulse wave Arterial Stiffness index	0	ukbb	European	SNPs from the MHC (chr6 26M~34M) region was removed for this traits	-0.0119	0.0465	-0.2558	0.7981	0.0386	0.0049	1.0086	0.0071	-0.013	0.0051
POAG	Valine	27005778	metabolites	European	SNPs from the MHC (chr6 26M~34M) region was removed for this traits	-0.0192	0.0759	-0.2531	0.8002	0.0613	0.0187	1.0152	0.0075	0.0039	0.0048
POAG	Diagnoses - main ICD10: Z47 Other orthopaedic follow-up care	0	ukbb	European	SNPs from the MHC (chr6 26M~34M) region was removed for this traits	0.0212	0.0854	0.2483	0.8039	0.0034	0.0012	0.998	0.0062	0.0027	0.0053
POAG	Ever had stillbirth_ spontaneous miscarriage or termination	0	ukbb	European	SNPs from the MHC (chr6 26M~34M) region was removed for this traits	-0.0136	0.0553	-0.2466	0.8052	0.0198	0.0032	0.9959	0.0078	-0.0027	0.0054
POAG	Mouth/teeth dental problems: Toothache	0	ukbb	European	SNPs from the MHC (chr6 26M~34M) region was removed for this traits	-0.0143	0.0581	-0.2462	0.8055	0.0084	0.0016	1.0048	0.0072	-0.0004	0.0052
POAG	Length of menstrual cycle	0	ukbb	European	SNPs from the MHC (chr6 26M~34M) region was removed for this traits	-0.0145	0.059	-0.2462	0.8056	0.1025	0.0208	0.9992	0.0068	-0.0012	0.0053
POAG	Diagnoses - main ICD10: J33 Nasal polyp	0	ukbb	European	SNPs from the MHC (chr6 26M~34M) region was removed for this traits	0.0235	0.0957	0.2459	0.8058	0.0032	0.0015	1.0073	0.0073	-7.71e-05	0.0053
POAG	Alcohol intake versus 10 years previously	0	ukbb	European	SNPs from the MHC (chr6 26M~34M) region was removed for this traits	-0.0088	0.0361	-0.2432	0.8078	0.0346	0.0023	1.0307	0.008	0.0021	0.0052
POAG	Amyotrophic lateral sclerosis	27455348	neurological	European	Caution: using this data may yield results outside bounds due to relative low Z score of the SNP heritability of the trait; SNPs from the MHC (chr6 26M~34M) region was removed for this traits	-0.0177	0.0736	-0.2405	0.8099	0.0489	0.0126	0.9948	0.0061	-0.0007	0.0051
POAG	Diagnoses - main ICD10: R11 Nausea and vomiting	0	ukbb	European	SNPs from the MHC (chr6 26M~34M) region was removed for this traits	-0.0387	0.1622	-0.2389	0.8112	0.0012	0.0012	0.9945	0.0062	0.0048	0.0054
POAG	Non-cancer illness code_ self-reported: sleep apnoea	0	ukbb	European	SNPs from the MHC (chr6 26M~34M) region was removed for this traits	0.0202	0.0851	0.2374	0.8124	0.0033	0.0014	1.0039	0.0069	0.0006	0.0055
POAG	Mineral and other dietary supplements: Glucosamine	0	ukbb	European	SNPs from the MHC (chr6 26M~34M) region was removed for this traits	0.0091	0.0391	0.2336	0.8153	0.0245	0.002	1.0081	0.0075	-0.0028	0.0056
POAG	Illnesses of father: Lung cancer	0	ukbb	European	SNPs from the MHC (chr6 26M~34M) region was removed for this traits	0.0111	0.0494	0.225	0.822	0.0149	0.002	0.9929	0.0072	0.0028	0.0055
POAG	Qualifications: NVQ or HND or HNC or equivalent	0	ukbb	European	SNPs from the MHC (chr6 26M~34M) region was removed for this traits	-0.0092	0.0409	-0.2248	0.8221	0.015	0.0017	1.011	0.0069	-0.006	0.0051
POAG	Underlying (primary) cause of death: ICD10: E85.4 Organ-limited amyloidosis	0	ukbb	European	SNPs from the MHC (chr6 26M~34M) region was removed for this traits	-0.0296	0.1321	-0.2242	0.8226	0.063	0.061	0.9995	0.007	-0.0007	0.0052
POAG	Mineral and other dietary supplements: Selenium	0	ukbb	European	SNPs from the MHC (chr6 26M~34M) region was removed for this traits	0.0157	0.0706	0.2229	0.8236	0.0064	0.0015	0.9995	0.0069	0.0015	0.0054
POAG	Snoring	0	ukbb	European	SNPs from the MHC (chr6 26M~34M) region was removed for this traits	0.0056	0.0251	0.2228	0.8237	0.0595	0.0027	1.025	0.009	-0.0032	0.0065
POAG	Concentration of chylomicrons and largest VLDL particles	27005778	metabolites	European	SNPs from the MHC (chr6 26M~34M) region was removed for this traits	0.0146	0.0661	0.2214	0.8248	0.1153	0.0262	0.9886	0.0063	-0.0056	0.0048
POAG	Mean Hippocampus	25607358	brain_volume	European	SNPs from the MHC (chr6 26M~34M) region was removed for this traits	-0.0162	0.0737	-0.2193	0.8264	0.1406	0.0389	0.9875	0.0064	0.0027	0.0052
POAG	Total cholesterol in medium HDL	27005778	metabolites	European	Caution: using this data may yield results outside bounds due to relative low Z score of the SNP heritability of the trait; SNPs from the MHC (chr6 26M~34M) region was removed for this traits	0.0182	0.0847	0.2153	0.8295	0.0555	0.0247	0.9986	0.0087	-0.0022	0.0051
POAG	Ferritin	25352340	metal	European	SNPs from the MHC (chr6 26M~34M) region was removed for this traits	-0.0164	0.0767	-0.2145	0.8302	0.0917	0.0268	1.0278	0.0093	-0.0045	0.0068
POAG	Other serious medical condition/disability diagnosed by doctor	0	ukbb	European	SNPs from the MHC (chr6 26M~34M) region was removed for this traits	0.0077	0.0359	0.214	0.8306	0.0255	0.0018	1.0104	0.0071	0.0139	0.0053
POAG	Diagnoses - main ICD10: K52 Other non-infective gastro-enteritis and colitis	0	ukbb	European	SNPs from the MHC (chr6 26M~34M) region was removed for this traits	0.017	0.0808	0.2106	0.8332	0.0049	0.0013	1.0036	0.006	0.0049	0.005
POAG	Total cholesterol in large LDL	27005778	metabolites	European	SNPs from the MHC (chr6 26M~34M) region was removed for this traits	0.0162	0.0788	0.205	0.8376	0.0656	0.0463	1.0147	0.0223	-0.0085	0.0048
POAG	Relative age voice broke	0	ukbb	European	SNPs from the MHC (chr6 26M~34M) region was removed for this traits	0.0061	0.0298	0.2033	0.8389	0.0723	0.0052	1.0108	0.0084	-0.0021	0.0052
POAG	Smoking status: Current	0	ukbb	European	SNPs from the MHC (chr6 26M~34M) region was removed for this traits	-0.007	0.0347	-0.2025	0.8395	0.0517	0.0028	1.0148	0.0091	-0.0022	0.0063
POAG	Relative age of first facial hair	0	ukbb	European	SNPs from the MHC (chr6 26M~34M) region was removed for this traits	0.0058	0.0286	0.2011	0.8406	0.1229	0.0078	1.0471	0.0151	-0.0046	0.0057
POAG	Duration of other exercises	0	ukbb	European	SNPs from the MHC (chr6 26M~34M) region was removed for this traits	0.012	0.0595	0.201	0.8407	0.0187	0.0032	1.0088	0.0071	-0.0015	0.0049
POAG	Major depressive disorder	22472876	psychiatric	European	SNPs from the MHC (chr6 26M~34M) region was removed for this traits	-0.0106	0.0527	-0.2008	0.8409	0.1743	0.0256	1.0036	0.006	0.0065	0.005
POAG	Mean diameter for LDL particles	27005778	metabolites	European	Caution: using this data may yield results outside bounds due to relative low Z score of the SNP heritability of the trait; SNPs from the MHC (chr6 26M~34M) region was removed for this traits	-0.0214	0.1065	-0.2006	0.841	0.0457	0.0264	1.0014	0.0124	0.0038	0.0049
POAG	Reproduciblity of spirometry measurement using ERS/ATS criteria	0	ukbb	European	SNPs from the MHC (chr6 26M~34M) region was removed for this traits	0.0109	0.0561	0.1936	0.8465	0.0144	0.0023	1.0079	0.0071	-0.0105	0.0054
POAG	Diagnoses - main ICD10: K60 Fissure and fistula of anal and rectal regions	0	ukbb	European	SNPs from the MHC (chr6 26M~34M) region was removed for this traits	0.0156	0.0817	0.1911	0.8484	0.0055	0.0014	0.9821	0.0067	-0.0009	0.0053
POAG	Time from waking to first cigarette	0	ukbb	European	SNPs from the MHC (chr6 26M~34M) region was removed for this traits	-0.0143	0.0774	-0.1853	0.853	0.0838	0.0264	1.0165	0.0075	-0.0044	0.0054
POAG	Primary biliary cirrhosis	26394269	autoimmune	European	SNPs from the MHC (chr6 26M~34M) region was removed for this traits	0.0093	0.0512	0.1812	0.8562	0.3757	0.0639	1.0039	0.0098	0.0039	0.006
POAG	Job involves shift work	0	ukbb	European	SNPs from the MHC (chr6 26M~34M) region was removed for this traits	-0.0073	0.0405	-0.1809	0.8565	0.0308	0.0028	1.0015	0.0065	0.0012	0.0049
POAG	Cancer code_ self-reported: basal cell carcinoma	0	ukbb	European	SNPs from the MHC (chr6 26M~34M) region was removed for this traits	0.011	0.061	0.1809	0.8565	0.0105	0.0019	0.9967	0.0078	-0.0031	0.0055
POAG	Non-cancer illness code_ self-reported: heart attack/myocardial infarction	0	ukbb	European	SNPs from the MHC (chr6 26M~34M) region was removed for this traits	0.0087	0.0486	0.18	0.8571	0.0192	0.0018	1.0108	0.0074	0.0047	0.0049
POAG	Cigarettes smoked per day	20418890	smoking_behaviour	European	SNPs from the MHC (chr6 26M~34M) region was removed for this traits	-0.0106	0.0594	-0.1787	0.8582	0.0602	0.015	1.0045	0.006	-0.0089	0.005
POAG	Leucine	27005778	metabolites	European	Caution: using this data may yield results outside bounds due to relative low Z score of the SNP heritability of the trait; SNPs from the MHC (chr6 26M~34M) region was removed for this traits	0.0146	0.0819	0.1781	0.8586	0.0478	0.0205	1.0078	0.0067	-0.0017	0.0047
POAG	Qualifications: A levels/AS levels or equivalent	0	ukbb	European	SNPs from the MHC (chr6 26M~34M) region was removed for this traits	-0.0044	0.0246	-0.1778	0.8589	0.0966	0.0035	1.0533	0.012	0.0036	0.0063
POAG	Diagnoses - main ICD10: I21 Acute myocardial infarction	0	ukbb	European	SNPs from the MHC (chr6 26M~34M) region was removed for this traits	0.0107	0.0607	0.1763	0.8601	0.0103	0.0016	1.0058	0.0073	-0.0021	0.0049
POAG	Ratio of bisallylic groups to double bonds	27005778	metabolites	European	Caution: using this data may yield results outside bounds due to relative low Z score of the SNP heritability of the trait; SNPs from the MHC (chr6 26M~34M) region was removed for this traits	0.0086	0.0489	0.1762	0.8602	0.2975	0.1124	0.9771	0.0087	0.0022	0.0051
POAG	Transport type for commuting to job workplace: Car/motor vehicle	0	ukbb	European	SNPs from the MHC (chr6 26M~34M) region was removed for this traits	-0.0085	0.049	-0.1733	0.8624	0.0244	0.0029	1.0238	0.0067	-0.003	0.0054
POAG	Diagnoses - main ICD10: M25 Other joint disorders_ not elsewhere classified	0	ukbb	European	SNPs from the MHC (chr6 26M~34M) region was removed for this traits	-0.0258	0.1519	-0.1701	0.8649	0.0011	0.0013	1.0149	0.0068	-0.0003	0.005
POAG	Number of days/week walked 10+ minutes	0	ukbb	European	SNPs from the MHC (chr6 26M~34M) region was removed for this traits	0.0047	0.0293	0.1615	0.8717	0.0423	0.0022	1.0098	0.0074	0.0028	0.0051
POAG	Phospholipids in very small VLDL	27005778	metabolites	European	SNPs from the MHC (chr6 26M~34M) region was removed for this traits	0.0123	0.0763	0.1606	0.8724	0.0855	0.0378	1.0146	0.0153	-0.0089	0.0049
POAG	Number of self-reported cancers	0	ukbb	European	SNPs from the MHC (chr6 26M~34M) region was removed for this traits	0.0127	0.0811	0.1567	0.8755	0.0065	0.0015	1.0137	0.0065	-0.0024	0.0055
POAG	Current tobacco smoking	0	ukbb	European	SNPs from the MHC (chr6 26M~34M) region was removed for this traits	-0.0051	0.0339	-0.1512	0.8798	0.055	0.0029	1.0144	0.0094	-0.0027	0.0063
POAG	Phospholipids in large LDL	27005778	metabolites	European	SNPs from the MHC (chr6 26M~34M) region was removed for this traits	0.0122	0.0808	0.1509	0.8801	0.0627	0.0442	1.0172	0.021	-0.0081	0.0048
POAG	Medication for pain relief_ constipation_ heartburn: Omeprazole (e.g. Zanprol)	0	ukbb	European	SNPs from the MHC (chr6 26M~34M) region was removed for this traits	-0.0058	0.0387	-0.1488	0.8817	0.0182	0.0016	1.0191	0.0069	0.0007	0.0048
POAG	Whole body fat mass	0	ukbb	European	SNPs from the MHC (chr6 26M~34M) region was removed for this traits	-0.0032	0.0216	-0.1487	0.8818	0.2344	0.0076	1.074	0.0177	-0.0021	0.0076
POAG	Concentration of IDL particles	27005778	metabolites	European	SNPs from the MHC (chr6 26M~34M) region was removed for this traits	0.0113	0.0772	0.1463	0.8837	0.0751	0.0427	1.0182	0.0179	-0.0083	0.0049
POAG	Miserableness	0	ukbb	European	SNPs from the MHC (chr6 26M~34M) region was removed for this traits	0.0041	0.0283	0.1448	0.8848	0.0642	0.0036	1.0183	0.011	0.0056	0.0061
POAG	Mineral and other dietary supplements: Zinc	0	ukbb	European	SNPs from the MHC (chr6 26M~34M) region was removed for this traits	0.0083	0.0572	0.1446	0.885	0.011	0.0014	0.9895	0.0059	0.0051	0.0056
POAG	Medication for cholesterol_ blood pressure_ diabetes_ or take exogenous hormones: Hormone replacement therapy	0	ukbb	European	SNPs from the MHC (chr6 26M~34M) region was removed for this traits	0.0076	0.0532	0.1423	0.8869	0.0156	0.0027	1.0014	0.0061	0.0029	0.0052
POAG	Diagnoses - main ICD10: J22 Unspecified acute lower respiratory infection	0	ukbb	European	SNPs from the MHC (chr6 26M~34M) region was removed for this traits	-0.0145	0.1023	-0.1416	0.8874	0.0028	0.0015	0.9993	0.0072	0.0016	0.0055
POAG	Cancer code_ self-reported: malignant melanoma	0	ukbb	European	SNPs from the MHC (chr6 26M~34M) region was removed for this traits	0.0113	0.0806	0.14	0.8886	0.005	0.0015	0.9935	0.0062	-0.0016	0.0055
POAG	Heart rate	23583979	haemotological	Mixed	Caution: using this data may yield less robust results due to minor departure of the LD structure; SNPs from the MHC (chr6 26M~34M) region was removed for this traits	-0.0059	0.0429	-0.1381	0.8901	0.0846	0.0092	1.0121	0.0085	-0.0008	0.006
POAG	Non-cancer illness code_ self-reported: hypertrophic cardiomyopathy (hcm / hocm)	0	ukbb	European	SNPs from the MHC (chr6 26M~34M) region was removed for this traits	-0.0194	0.1408	-0.138	0.8903	0.0015	0.0013	1.0014	0.0066	-0.0035	0.0054
POAG	Frequency of unenthusiasm / disinterest in last 2 weeks	0	ukbb	European	SNPs from the MHC (chr6 26M~34M) region was removed for this traits	-0.0046	0.0333	-0.1373	0.8908	0.0388	0.0027	1.0177	0.009	0.0075	0.0056
POAG	Leg pain on walking	0	ukbb	European	SNPs from the MHC (chr6 26M~34M) region was removed for this traits	0.0054	0.0397	0.1373	0.8908	0.057	0.0051	1.0096	0.0068	0.0009	0.0055
POAG	Age at Menarche	25231870	reproductive	European	SNPs from the MHC (chr6 26M~34M) region was removed for this traits	-0.0035	0.0266	-0.1329	0.8943	0.2018	0.0099	0.9544	0.0116	0.0017	0.0058
POAG	Trunk fat percentage	0	ukbb	European	SNPs from the MHC (chr6 26M~34M) region was removed for this traits	0.0029	0.0216	0.1322	0.8948	0.2065	0.0068	1.0845	0.0177	-0.003	0.0071
POAG	Pain type(s) experienced in last month: Facial pain	0	ukbb	European	SNPs from the MHC (chr6 26M~34M) region was removed for this traits	0.0079	0.0628	0.1251	0.9004	0.0069	0.0014	0.9972	0.0061	0.0065	0.0054
POAG	Cancer code_ self-reported: lung cancer	0	ukbb	European	SNPs from the MHC (chr6 26M~34M) region was removed for this traits	0.0289	0.2324	0.1242	0.9012	0.0005	0.0012	0.9919	0.0065	0.0024	0.0051
POAG	Non-cancer illness code_ self-reported: uterine fibroids	0	ukbb	European	SNPs from the MHC (chr6 26M~34M) region was removed for this traits	-0.0078	0.0632	-0.1226	0.9024	0.007	0.0015	1.0075	0.0069	-0.0073	0.0053
POAG	Diagnoses - main ICD10: M72 Fibroblastic disorders	0	ukbb	European	SNPs from the MHC (chr6 26M~34M) region was removed for this traits	0.0067	0.0553	0.1211	0.9036	0.0105	0.0031	1.0169	0.0205	-0.0016	0.0059
POAG	Types of physical activity in last 4 weeks: Heavy DIY (eg: weeding_ lawn mowing_ carpentry_ digging)	0	ukbb	European	SNPs from the MHC (chr6 26M~34M) region was removed for this traits	0.0037	0.0309	0.1199	0.9046	0.0341	0.002	1.0065	0.0072	-0.0041	0.0058
POAG	Leptin_adjBMI	26833098	hormone	European	SNPs from the MHC (chr6 26M~34M) region was removed for this traits	0.0069	0.0581	0.1187	0.9055	0.0946	0.0175	1.0035	0.007	-0.0031	0.0053
POAG	Phenylalanine	27005778	metabolites	European	Caution: using this data may yield results outside bounds due to relative low Z score of the SNP heritability of the trait; SNPs from the MHC (chr6 26M~34M) region was removed for this traits	0.0103	0.0899	0.1149	0.9085	0.056	0.0219	1.004	0.0068	-0.002	0.0051
POAG	Used an inhaler for chest within last hour	0	ukbb	European	SNPs from the MHC (chr6 26M~34M) region was removed for this traits	0.0093	0.0813	0.1144	0.9089	0.0043	0.0015	1.002	0.0062	-0.0016	0.0054
POAG	Years of schooling 2013	23722424	education	European	SNPs from the MHC (chr6 26M~34M) region was removed for this traits	-0.0044	0.0389	-0.1123	0.9106	0.0844	0.0062	1.0188	0.0089	0.0012	0.0062
POAG	Nap during day	0	ukbb	European	SNPs from the MHC (chr6 26M~34M) region was removed for this traits	-0.0026	0.0235	-0.1086	0.9135	0.0807	0.0034	1.0228	0.0099	0.0019	0.0058
POAG	Femoral Neck bone mineral density	26367794	bone	Mixed	Caution: using this data may yield less robust results due to minor departure of the LD structure; SNPs from the MHC (chr6 26M~34M) region was removed for this traits	-0.0045	0.0421	-0.1063	0.9153	0.1265	0.0146	0.9745	0.008	0.0001	0.0052
POAG	Average number of double bonds in a fatty acid chain	27005778	metabolites	European	SNPs from the MHC (chr6 26M~34M) region was removed for this traits	-0.0066	0.0617	-0.1062	0.9154	0.174	0.056	1.0012	0.0074	0.0061	0.0051
POAG	Age when periods started (menarche)	0	ukbb	European	SNPs from the MHC (chr6 26M~34M) region was removed for this traits	0.0023	0.024	0.0953	0.924	0.2093	0.0104	1.0038	0.0125	-0.0028	0.006
POAG	Sitting height ratio	25865494	anthropometric	European	SNPs from the MHC (chr6 26M~34M) region was removed for this traits	0.0044	0.046	0.0952	0.9241	0.2213	0.0282	0.98	0.0075	0.0031	0.0056
POAG	Types of physical activity in last 4 weeks: Other exercises (eg: swimming_ cycling_ keep fit_ bowling)	0	ukbb	European	SNPs from the MHC (chr6 26M~34M) region was removed for this traits	-0.0035	0.0364	-0.095	0.9243	0.0466	0.0024	1.013	0.0083	-0.0106	0.0065
POAG	Phospholipids in medium HDL	27005778	metabolites	European	SNPs from the MHC (chr6 26M~34M) region was removed for this traits	0.0073	0.0785	0.0936	0.9255	0.0673	0.0234	0.9951	0.0075	-0.0021	0.0052
POAG	Non-cancer illness code_ self-reported: polio / poliomyelitis	0	ukbb	European	SNPs from the MHC (chr6 26M~34M) region was removed for this traits	-0.0085	0.095	-0.0898	0.9285	0.0027	0.0013	0.9926	0.0065	-0.002	0.0046
POAG	Number of cigarettes currently smoked daily (current cigarette smokers)	0	ukbb	European	SNPs from the MHC (chr6 26M~34M) region was removed for this traits	-0.0057	0.0713	-0.0805	0.9359	0.1023	0.0263	1.001	0.0069	0.0078	0.0057
POAG	Townsend deprivation index at recruitment	0	ukbb	European	SNPs from the MHC (chr6 26M~34M) region was removed for this traits	-0.0026	0.0324	-0.0795	0.9367	0.0337	0.002	1.0349	0.007	-0.0117	0.0054
POAG	Mouth/teeth dental problems: Bleeding gums	0	ukbb	European	SNPs from the MHC (chr6 26M~34M) region was removed for this traits	0.0033	0.0421	0.078	0.9379	0.0223	0.0019	1.0114	0.0079	-0.004	0.0053
POAG	Diagnoses - main ICD10: I83 Varicose veins of lower extremities	0	ukbb	European	SNPs from the MHC (chr6 26M~34M) region was removed for this traits	-0.0032	0.0411	-0.0779	0.9379	0.0192	0.0023	1.0337	0.0111	-0.0028	0.0055
POAG	Non-cancer illness code_ self-reported: varicose veins	0	ukbb	European	SNPs from the MHC (chr6 26M~34M) region was removed for this traits	-0.0062	0.08	-0.0772	0.9385	0.0044	0.0014	1.0115	0.0064	-0.0096	0.0052
POAG	Coronary artery disease	26343387	cardiometabolic	Mixed	Caution: using this data may yield less robust results due to minor departure of the LD structure; SNPs from the MHC (chr6 26M~34M) region was removed for this traits	-0.0034	0.0455	-0.0755	0.9398	0.0795	0.0057	1.0435	0.0092	0.0038	0.006
POAG	Daytime dozing / sleeping (narcolepsy)	0	ukbb	European	SNPs from the MHC (chr6 26M~34M) region was removed for this traits	0.0021	0.0288	0.0746	0.9405	0.0487	0.0028	1.0095	0.0086	-0.0035	0.0057
POAG	Diagnoses - main ICD10: O75 Other complications of labour and delivery_ not elsewhere classified	0	ukbb	European	SNPs from the MHC (chr6 26M~34M) region was removed for this traits	-0.0074	0.1	-0.0738	0.9412	0.0031	0.0012	0.9873	0.0058	-0.0016	0.0054
POAG	Pain type(s) experienced in last month: Hip pain	0	ukbb	European	SNPs from the MHC (chr6 26M~34M) region was removed for this traits	-0.0028	0.0381	-0.073	0.9418	0.0236	0.0019	1.0186	0.0075	0.0079	0.0052
POAG	Non-cancer illness code_ self-reported: mania/bipolar disorder/manic depression	0	ukbb	European	SNPs from the MHC (chr6 26M~34M) region was removed for this traits	0.0051	0.0728	0.0699	0.9443	0.0055	0.0014	1.0008	0.006	0.0002	0.0056
POAG	Non-cancer illness code_ self-reported: angina	0	ukbb	European	SNPs from the MHC (chr6 26M~34M) region was removed for this traits	-0.0035	0.0505	-0.0691	0.9449	0.0226	0.0021	1.0223	0.0078	0.0098	0.0058
POAG	Number of full brothers	0	ukbb	European	SNPs from the MHC (chr6 26M~34M) region was removed for this traits	-0.0031	0.0455	-0.069	0.945	0.0187	0.0018	1.0284	0.0074	-0.0041	0.0059
POAG	Current employment status: Doing unpaid or voluntary work	0	ukbb	European	SNPs from the MHC (chr6 26M~34M) region was removed for this traits	-0.0037	0.0536	-0.0688	0.9452	0.0092	0.0014	1.0081	0.0063	0.0047	0.0051
POAG	Non-cancer illness code_ self-reported: malabsorption/coeliac disease	0	ukbb	European	SNPs from the MHC (chr6 26M~34M) region was removed for this traits	-0.0033	0.0507	-0.0653	0.9479	0.0168	0.0121	0.9952	0.0209	-0.0037	0.0052
POAG	Description of average fatty acid chain length; not actual carbon number	27005778	metabolites	European	SNPs from the MHC (chr6 26M~34M) region was removed for this traits	0.0049	0.0765	0.0644	0.9486	0.1007	0.0342	0.9832	0.0064	0.002	0.0045
POAG	Alcohol drinker status: Never	0	ukbb	European	SNPs from the MHC (chr6 26M~34M) region was removed for this traits	0.0032	0.0497	0.064	0.949	0.0144	0.0016	1.0158	0.0065	0.0054	0.0055
POAG	Why stopped smoking: Doctors advice	0	ukbb	European	SNPs from the MHC (chr6 26M~34M) region was removed for this traits	0.0045	0.0719	0.0627	0.95	0.0187	0.0052	0.9967	0.0057	0.006	0.0046
POAG	Irritability	0	ukbb	European	SNPs from the MHC (chr6 26M~34M) region was removed for this traits	-0.0019	0.0318	-0.06	0.9522	0.0679	0.0042	0.9926	0.0112	-0.0049	0.0066
POAG	Mouth/teeth dental problems: Dentures	0	ukbb	European	SNPs from the MHC (chr6 26M~34M) region was removed for this traits	0.002	0.0336	0.0597	0.9524	0.0481	0.0027	1.0361	0.0094	0.0104	0.0065
POAG	Vascular/heart problems diagnosed by doctor: Angina	0	ukbb	European	SNPs from the MHC (chr6 26M~34M) region was removed for this traits	-0.0031	0.0518	-0.0596	0.9525	0.022	0.0021	1.0254	0.0079	0.0105	0.0058
POAG	Frequency of walking for pleasure in last 4 weeks	0	ukbb	European	SNPs from the MHC (chr6 26M~34M) region was removed for this traits	0.0022	0.0378	0.0573	0.9543	0.0344	0.0026	1.0076	0.0076	0.0105	0.0052
POAG	HbA1C	20858683	glycemic	European	SNPs from the MHC (chr6 26M~34M) region was removed for this traits	-0.0028	0.0492	-0.0569	0.9546	0.0656	0.0116	0.9989	0.007	0.002	0.0051
POAG	Duration of walks	0	ukbb	European	SNPs from the MHC (chr6 26M~34M) region was removed for this traits	0.0016	0.0309	0.051	0.9594	0.0467	0.0028	1.0065	0.0083	0.0046	0.0056
POAG	Non-cancer illness code_ self-reported: pneumothorax	0	ukbb	European	SNPs from the MHC (chr6 26M~34M) region was removed for this traits	0.0043	0.0875	0.049	0.9609	0.0029	0.0014	0.9883	0.007	0.0068	0.0048
POAG	Diagnoses - main ICD10: M10 Gout	0	ukbb	European	SNPs from the MHC (chr6 26M~34M) region was removed for this traits	0.0058	0.1229	0.0471	0.9624	0.0022	0.0015	1	0.0068	0.0011	0.0053
POAG	Vascular/heart problems diagnosed by doctor: Heart attack	0	ukbb	European	SNPs from the MHC (chr6 26M~34M) region was removed for this traits	0.002	0.0481	0.0413	0.9671	0.0188	0.0018	1.0126	0.0075	0.0051	0.0049
POAG	Frequency of light DIY in last 4 weeks	0	ukbb	European	SNPs from the MHC (chr6 26M~34M) region was removed for this traits	0.0019	0.049	0.0388	0.969	0.022	0.0029	1.0048	0.0063	-0.0004	0.0052
POAG	Obesity class 3	23563607	anthropometric	European	SNPs from the MHC (chr6 26M~34M) region was removed for this traits	0.0018	0.0501	0.0367	0.9707	0.1218	0.0141	0.9797	0.0091	-0.0039	0.0069
POAG	Non-cancer illness code_ self-reported: osteoporosis	0	ukbb	European	SNPs from the MHC (chr6 26M~34M) region was removed for this traits	0.0018	0.0524	0.0346	0.9724	0.0149	0.0019	1.0008	0.0075	0.007	0.0057
POAG	Diagnoses - main ICD10: R14 Flatulence and related conditions	0	ukbb	European	SNPs from the MHC (chr6 26M~34M) region was removed for this traits	-0.003	0.0879	-0.034	0.9729	0.0032	0.0013	0.9923	0.0067	-0.0016	0.0052
POAG	Body fat percentage	0	ukbb	European	SNPs from the MHC (chr6 26M~34M) region was removed for this traits	-0.0007	0.0213	-0.0338	0.973	0.2166	0.0068	1.0833	0.0175	-0.0008	0.0072
POAG	Extreme height	23563607	anthropometric	European	SNPs from the MHC (chr6 26M~34M) region was removed for this traits	0.0014	0.0485	0.0287	0.9771	1.2302	0.1061	1.0366	0.0177	0.0067	0.0102
POAG	Trunk fat mass	0	ukbb	European	SNPs from the MHC (chr6 26M~34M) region was removed for this traits	-0.0006	0.0218	-0.0274	0.9782	0.2312	0.0075	1.0788	0.0182	-0.0028	0.0076
POAG	Diagnoses - main ICD10: I25 Chronic ischaemic heart disease	0	ukbb	European	SNPs from the MHC (chr6 26M~34M) region was removed for this traits	0.0013	0.062	0.0215	0.9828	0.0199	0.0023	1.0204	0.0074	0.0009	0.0059
POAG	Diagnoses - main ICD10: K20 Oesophagitis	0	ukbb	European	SNPs from the MHC (chr6 26M~34M) region was removed for this traits	0.0019	0.1023	0.0187	0.985	0.0021	0.0013	1.0068	0.0066	0.0009	0.0042
POAG	Mouth/teeth dental problems: None of the above	0	ukbb	European	SNPs from the MHC (chr6 26M~34M) region was removed for this traits	-0.0007	0.035	-0.0186	0.9851	0.0374	0.002	1.0185	0.0079	-0.0028	0.0055
POAG	Diagnoses - main ICD10: K29 Gastritis and duodenitis	0	ukbb	European	SNPs from the MHC (chr6 26M~34M) region was removed for this traits	0.0012	0.0631	0.0184	0.9853	0.0073	0.0015	1.0045	0.0066	-0.0009	0.0051
POAG	Cancer diagnosed by doctor	0	ukbb	European	SNPs from the MHC (chr6 26M~34M) region was removed for this traits	-0.001	0.0774	-0.0129	0.9897	0.0066	0.0015	1.01	0.0065	0.0001	0.0052
POAG	Ever had prostate specific antigen (PSA) test	0	ukbb	European	SNPs from the MHC (chr6 26M~34M) region was removed for this traits	0.0006	0.0505	0.0123	0.9902	0.0339	0.0033	1.0037	0.0072	-0.0049	0.0051
POAG	Diagnoses - main ICD10: C44 Other malignant neoplasms of skin	0	ukbb	European	SNPs from the MHC (chr6 26M~34M) region was removed for this traits	0.0007	0.064	0.0113	0.991	0.0097	0.0023	1.0109	0.0087	-0.0076	0.0055
POAG	Pack Years	30617275	smoking_behaviour	European	Caution: using this data may yield results outside bounds due to relative low Z score of the SNP heritability of the trait; SNPs from the MHC (chr6 26M~34M) region was removed for this traits	0.001	0.09	0.0113	0.991	0.1042	0.0346	1.0335	0.035	-0.0046	0.0304
POAG	Phospholipids in IDL	27005778	metabolites	European	SNPs from the MHC (chr6 26M~34M) region was removed for this traits	0.0009	0.0799	0.0108	0.9914	0.0612	0.0413	1.0208	0.0191	-0.0073	0.0047
POAG	Attention deficit hyperactivity disorder (GC)	27663945	psychiatric	European	Caution: using this data may yield results outside bounds due to relative low Z score of the SNP heritability of the trait; SNPs from the MHC (chr6 26M~34M) region was removed for this traits	0.0007	0.0891	0.0076	0.994	0.074	0.0298	0.9926	0.0074	0.0024	0.0057
POAG	Average number of methylene groups per a double bond	27005778	metabolites	European	Caution: using this data may yield results outside bounds due to relative low Z score of the SNP heritability of the trait; SNPs from the MHC (chr6 26M~34M) region was removed for this traits	-0.0002	0.0605	-0.004	0.9968	0.2037	0.0823	0.9953	0.0079	-0.0048	0.0051
POAG	Forearm Bone mineral density	26367794	bone	Mixed	Caution: using this data may yield results outside bounds due to relative low Z score of the SNP heritability of the trait; using this data may yield less robust results due to minor departure of the LD structure; SNPs from the MHC (chr6 26M~34M) region was removed for this traits	0.0003	0.0947	0.0034	0.9973	0.09	0.0414	1.0111	0.0064	-0.0026	0.0046
POAG	Non-cancer illness code_ self-reported: iron deficiency anaemia	0	ukbb	European	SNPs from the MHC (chr6 26M~34M) region was removed for this traits	0.0001	0.0773	0.0019	0.9985	0.0046	0.0013	0.9899	0.0059	6.74e-05	0.0054
POAG	Cancer code_ self-reported: squamous cell carcinoma	0	ukbb	European	SNPs from the MHC (chr6 26M~34M) region was removed for this traits	0.0002	0.1021	0.0016	0.9987	0.0022	0.0013	0.9994	0.0066	-0.004	0.0049
POAG	Attention deficit hyperactivity disorder (No GC)	27663945	psychiatric	European	Caution: using this data may yield results outside bounds due to relative low Z score of the SNP heritability of the trait; SNPs from the MHC (chr6 26M~34M) region was removed for this traits	4.36e-05	0.089	0.0005	0.9996	0.075	0.0302	1.0072	0.0075	0.0024	0.0058

## Sheet: Supplementary Data 10
META					PAINTOR CROSS-ANCESTRY									PAINTOR EUR									PAINTOR ASN									PAINTOR AFR
Best_SNP_meta	CHR	Position	Status		SNP1_cross-ancestry	CHR	POS	SNP1_cross-ancestry_Posterior_Prob	SNP2_cross-ancestry	CHR	POS	SNP2_cross-ancestry_Posterior_Prob		SNP1_EUR	CHR	POS	SNP1_EUR_Posterior_Prob EUR	SNP2_EUR	CHR	POS	SNP2_EUR_Posterior_Prob EUR		SNP1_ASN	CHR	POS	SNP1_ASN_Posterior_Prob	SNP2_ASN	CHR	POS	SNP2_ASN_Posterior_Prob		SNP1_AFR	CHR	POS	SNP1_AFR_Posterior_Prob	SNP2_AFR	CHR	POS	SNP2_AFR_Posterior_Prob
rs172531	1	8495590	Novel		rs301796	1	8466730	0.82037	rs301795	1	8467353	0.999998		rs301795	1	8467353	1	rs301792	1	8468278	0.887768		rs159961	1	8484228	0.907102	rs302714	1	8486131	1		rs6694662	1	8307319	0.611052	rs6657240	1	8307467	0.611052
rs4652902	1	36612955	Known		rs6425966	1	36611287	1	rs4652902	1	36612955	1		rs4652902	1	36612955	0.999979	rs7522400	1	36613380	0.717157		rs72653582	1	37575263	0.999997	rs12075796	1	37582206	0.997045		rs147125804	1	37075795	1	rs12090333	1	37077776	1
rs10908363	1	38076621	Known		rs6687545	1	38071195	1	rs4652964	1	38078300	1		rs6687545	1	38071195	1	rs4652964	1	38078300	1		rs56318254	1	38097430	1	rs11264077	1	38099087	1		rs17465420	1	38398588	0.998505	rs28493395	1	38400558	0.998505
rs941125	1	54123873	Novel		rs12568524	1	54121976	1	rs12561920	1	54121981	1		rs17384346	1	54187282	1	rs797906	1	54190695	1		rs12568524	1	54121976	1	rs12561920	1	54121981	1		rs12057424	1	54646167	0.525281
rs4076000	1	68837169	Novel		rs1952124	1	68842068	1	rs728893	1	68842742	1		rs1601	1	68830701	0.756509	rs6700725	1	68833777	1		rs9436382	1	68821229	0.71365						rs74790585	1	68772380	1	rs75759051	1	68778242	1
rs12139208	1	88213014	Known		rs17467793	1	88209373	0.999995	rs11590929	1	88214437	0.999995		1:88210715	1	88210715	1	rs12139208	1	88213014	1		rs10873802	1	87286434	0.747741						rs74102517	1	88146562	0.435625	rs76974956	1	88146796	0.437536
rs1192415	1	92077097	Known		rs1192415	1	92077097	1	rs4658101	1	92077409	1		rs1192415	1	92077097	1	rs4658101	1	92077409	1		rs2136115	1	92073707	0.998998	rs12031478	1	92074734	0.985567		rs146501445	1	91927543	0.999252	rs114538670	1	91933395	0.987187
rs12566440	1	101095202	Novel		rs34202160	1	101102673	0.992776	rs72977390	1	101107147	0.948618		rs34202160	1	101102673	1	rs72977390	1	101107147	0.979507		rs114741051	1	101892573	1	rs12089445	1	101901462	0.673971		rs61812650	1	100730148	1	rs768794620	1	100730150	1
rs3753841	1	103379918	Known		rs4908272	1	103379548	1	rs1841837	1	103384044	1		rs4908272	1	103379548	0.869844	rs1841837	1	103384044	0.971675		rs1318756	1	103340623	0.995642	rs746684973	1	103347728	0.995642		rs9787294	1	103266926	0.574732	rs12086644	1	103277571	0.863562
rs1106287	1	113242122	Known		rs3748656	1	113236681	1	rs883593	1	113237171	1		rs3748656	1	113236681	1	rs883593	1	113237171	0.80648		rs773580	1	113836814	0.999988	rs773581	1	113836827	0.999988		rs773580	1	113836814	0.999988	rs773581	1	113836827	0.999988
rs4542196	1	162679145	Novel		rs6691289	1	162644912	1	rs4233392	1	162645571	1		rs10799862	1	162644411	0.5	rs6691289	1	162644912	1		rs10917583	1	162630894	0.999279						rs12121310	1	161719215	0.999961	rs1063178	1	161721707	0.999961
rs2790053	1	165737704	Known		rs10800153	1	165713240	0.996939	rs7518099	1	165736880	1		rs7555523	1	165718979	0.987777	rs6662839	1	165722646	1		rs1974080	1	165317996	0.873643	rs565093501	1	165318855	0.791184		rs11807536	1	165251642	1	rs58462518	1	165252313	1
rs74315329	1	171605478	Known		rs10911684	1	172367677	1	rs7544610	1	172365717	0.725389		rs17551298	1	170701453	0.738908	rs3820416	1	170707675	0.982597		rs9425587	1	172351809	0.99067						rs1555381	1	172008479	1	rs2208366	1	172015194	1
rs6667536	1	219215137	Known		rs622796	1	219134231	0.673471	rs586038	1	219134267	0.688446		rs10863446	1	219486989	0.999847	rs11118275	1	219497096	1		rs17048642	1	218982779	0.815548	rs17048643	1	218982909	0.531148		rs11118312	1	219645151	0.895202	rs11118313	1	219647057	0.64225
rs12623251	2	12951321	Novel		rs4668787	2	12950612	1	rs12623251	2	12951321	1		rs13016655	2	12877204	0.5	rs2042567	2	12878642	0.999874		rs1465488	2	12938285	0.56911						rs17465002	2	12867780	1	rs17465023	2	12867807	1
rs17006576	2	28365914	Known		rs13384961	2	28361994	0.881249	rs13393848	2	28362014	0.952839		rs13384961	2	28361994	0.955887	rs17006576	2	28365914	0.768925		rs10865500	2	28770509	0.520295	rs10865501	2	28770621	0.94376		rs67394291	2	29191151	0.74884	rs66939948	2	29191606	0.74884
rs687914	2	45878760	Known		rs7571291	2	45945404	1	rs7598459	2	45945723	1		rs7571291	2	45945404	1	rs7598459	2	45945723	1		rs78962129	2	45331475	1	rs35976042	2	45331904	1		rs952331	2	45966098	1	rs1403449	2	45966536	1
rs2627761	2	55933014	Known		rs782609	2	55936070	1	rs6705570	2	55937036	1		rs6743072	2	55933668	0.850215	rs1084523	2	55936792	0.5		rs2627772	2	55898930	1	rs782578	2	55915904	1		2:56119150	2	56119150	1	rs3838528	2	56119668	1
rs6713914	2	59523041	Novel		rs1344458	2	59487230	1	rs13017760	2	59488442	1		rs1344458	2	59487230	0.999957	rs13017760	2	59488442	0.999957		rs10206962	2	60383046	1	rs7591835	2	60385252	1		rs138132252	2	59725394	0.84182	rs72810135	2	59735475	0.843082
rs4414666	2	66537344	Known		rs2860463	2	66583496	1	rs2971811	2	66583690	1		rs4588174	2	66537359	1	rs35092497	2	66545797	1		rs2222252	2	66592742	1	rs556267193	2	66594487	1		rs12991257	2	67527590	1	rs1483334	2	67530245	1
rs6732795	2	69411517	Known		rs6732795	2	69411517	1	rs11126225	2	69413160	1		rs6732795	2	69411517	0.999981	rs11126225	2	69413160	0.999981		rs13424360	2	69331016	0.999679	rs13401320	2	69331140	0.999679		rs58002701	2	68915201	0.999883	rs4854488	2	68916120	0.999986
rs12613800	2	71651939	Novel		rs12464713	2	71553752	1	rs1861848	2	71555356	1		rs12464713	2	71553752	1	rs1861848	2	71555356	1		rs187706922	2	71223947	0.995559	rs72834405	2	71227080	0.940223		rs11899440	2	71837258	0.918924	rs13395087	2	71837413	0.918998
rs9308689	2	111638775	Known		rs9308689	2	111638775	1	rs9308690	2	111638898	0.63912		rs9308689	2	111638775	1						rs4849402	2	111873932	0.832032	rs4849403	2	111874037	0.999941		rs6748319	2	111992490	0.982157	rs17041941	2	111993364	0.982157
rs1579050	2	153364527	Known		rs62180804	2	153359512	1	rs55882252	2	153361700	1		rs62180804	2	153359512	1	rs55882252	2	153361700	1		rs116553601	2	152376957	0.839331	rs118137536	2	152378407	0.549328		rs6742066	2	153329163	0.573346	rs10191361	2	153340848	0.772933
rs200621439	2	213760746	Known		rs376335083	2	213744999	1	rs369649345	2	213745006	1		rs376335083	2	213744999	0.999976	rs369649345	2	213745006	0.999976		rs4511675	2	213233739	0.999072						rs1922797	2	214027642	0.988012	rs11898263	2	214030649	0.988012
rs9852634	3	24510794	Novel		rs9852634	3	24510794	1	rs4276130	3	24512855	1		rs35611707	3	24512268	0.768787	rs4353759	3	24512956	0.968094		rs3925493	3	24510782	1	rs2362187	3	24512264	0.969829		rs13325682	3	24371353	1	3:24371640	3	24371640	1
rs1286770	3	25581798	Known		rs1286770	3	25581798	1	3:25581866	3	25581866	1		rs1286770	3	25581798	1	3:25581866	3	25581866	1		rs1435705	3	25568871	0.99373	rs17525900	3	25569881	0.99373		rs11129204	3	25776281	0.980394	rs11129206	3	25786884	0.980164
rs1500708	3	56876596	Novel		rs7636889	3	56874033	1	rs1500708	3	56876596	0.996671		rs7636574	3	56871432	1	rs7636889	3	56874033	1		rs1500712	3	56859335	1	rs58823518	3	56859719	1		rs6445844	3	57053921	1	rs6777008	3	57054271	1
rs13101042	3	85172364	Known		rs13097560	3	85129329	1	rs6775752	3	85130981	1		rs13097560	3	85129329	0.990053	rs6775752	3	85130981	1		rs76098029	3	84742731	0.667402						rs2200467	3	85050850	0.999988	rs73139653	3	85051152	0.805225
rs6437582	3	105073472	Novel		rs7626665	3	105073232	1	rs6437582	3	105073472	1		rs7626665	3	105073232	1	rs6437582	3	105073472	1		rs116530606	3	105992021	0.770611	rs115578816	3	105992222	0.999947		rs6437579	3	105048342	0.624003	rs4894920	3	105060006	1
rs11710845	3	150065280	Known		rs11710139	3	150059342	1	rs4681610	3	150064115	0.818304		rs4681610	3	150064115	0.781154	rs11710845	3	150065280	0.999017		rs113262901	3	149486553	0.999909	rs201520208	3	149506845	0.999909		3:150191565	3	150191565	1	rs11714034	3	150193028	1
rs4361323	3	169239578	Known		rs9816799	3	169222771	1	rs9875402	3	169228311	1		rs6772796	3	169235397	1	rs9876326	3	169244024	0.956746		rs79672513	3	168898156	0.999956	rs79514433	3	168898165	0.999956		rs2687707	3	168469608	0.999561	rs494742	3	168482000	1
rs62283813	3	171821356	Known		rs62283792	3	171816350	1	rs62283794	3	171817722	1		rs62283813	3	171821356	0.999967	rs62283816	3	171826840	0.941819		rs58812088	3	171808746	0.999993	3:171809304	3	171809304	0.999993		rs1818046	3	172645941	1	rs13098962	3	172648107	1
rs56233426	3	186128816	Known		rs28818294	3	186217278	0.988169	rs62290745	3	186217543	0.732155		rs4541399	3	186116640	0.717358	rs6769901	3	186119965	0.808597		rs9859626	3	186217122	0.517235	rs28818294	3	186217278	0.736086		rs72497188	3	185289536	1	rs77466231	3	185290725	0.566324
rs6787621	3	188066953	Known		rs7647214	3	188055662	1	rs4420855	3	188057207	1		rs7647214	3	188055662	1	rs4420855	3	188057207	1		rs12494557	3	188050534	0.502837	rs113253929	3	188052364	0.5		rs4516602	3	187218663	1	rs1823708	3	187219139	1
rs938604	4	7904363	Known		rs34685551	4	7887463	0.999994	rs7441569	4	7887548	0.572372		rs7441569	4	7887548	0.5	rs7437984	4	7887588	0.5		rs11723068	4	7797435	0.97192	rs4689165	4	7798537	1		rs1557817	4	7772551	1	rs6827395	4	7774048	1
rs10517281	4	54027595	Novel		rs10517281	4	54027595	1	rs58127734	4	54029543	1		rs10517281	4	54027595	1	rs58127734	4	54029543	1		rs6855266	4	54810318	1	rs1996755	4	54811258	1		rs6554100	4	54240108	0.843579	rs6834934	4	54242085	0.996532
rs57400569	4	89752276	Novel		rs57400569	4	89752276	1	rs4425336	4	89753225	1		rs57400569	4	89752276	1	rs4425336	4	89753225	1		rs2725269	4	89009006	1	rs2725268	4	89010983	1		rs6850389	4	90527344	0.998938	rs6849913	4	90527394	1
rs17527016	4	111963719	Novel		rs3861767	4	112808238	0.991481	4:112811125	4	112811125	0.991481		rs59166867	4	111863509	0.999872	rs17626319	4	111865993	0.999579		rs6843121	4	112799771	0.931326						rs7668850	4	112025389	1	rs555117982	4	112025406	1
rs6552711	4	184779187	Novel		rs17361576	4	184792187	1	rs12644463	4	184792373	1		rs17361576	4	184792187	1	rs12644463	4	184792373	1		rs955229	4	184296883	1	rs114569759	4	184299628	0.999997		rs35626471	4	183883042	1	rs35267051	4	183888405	1
rs31916	5	14814883	Known		rs368503	5	14820417	1	rs31918	5	14820927	1		rs368503	5	14820417	1	rs31918	5	14820927	1		rs642736	5	14008275	0.502522	rs10073221	5	14010231	0.78187		rs27112	5	14449136	1	rs27100	5	14462816	1
rs112142644	5	55783678	Known		rs12187312	5	55781772	0.999999	rs12187847	5	55781782	0.999999		rs286008	5	55703924	1	rs286004	5	55706081	0.965139		rs66480756	5	55785465	0.511967						rs3846522	5	55475759	1	rs7708868	5	55475864	1
rs2745572	6	1548369	Known		rs2761233	6	1949101	1	rs2761235	6	1951135	1		rs17135234	6	593109	1	rs4335022	6	596417	1		rs2761233	6	1949101	1	rs7759192	6	1954508	0.900738		rs10458143	6	2479086	0.721469	rs7747066	6	2490587	1
rs407238/rs115586772	6	29806901	Novel		rs1056241	6	29893195	0.91238	rs2517777	6	29893848	0.91238		rs4959041	6	30077967	1	rs10947053	6	30077584	0.812228		rs9391677	6	30145807	0.982231	rs61285697	6	30154351	0.65312		rs6926530	6	30730267	1	rs2894045	6	30733019	1
rs7344	6	36570366	Known		rs9368943	6	36566575	1	rs7344	6	36570366	1		rs7344	6	36570366	0.998836	rs12208086	6	36586070	0.823404		rs9368943	6	36566575	1	rs7344	6	36570366	1		rs195384	6	37334170	0.999763	rs195383	6	37334759	0.999763
rs3777588	6	45919758	Novel		rs2027273	6	45934006	0.824525	rs2027274	6	45934080	1		rs2027274	6	45934080	1	rs2027273	6	45934006	0.5		rs35565233	6	45349497	0.985951	rs12525950	6	45354814	0.926744		rs1051931	6	46672943	0.998977	rs7756935	6	46675025	0.998977
rs72904286	6	51414922	Known		rs2149576	6	51459777	0.999792	rs1111790	6	51470170	0.999986		rs2149576	6	51459777	0.999969	rs2579998	6	51477322	0.998847		rs1507911	6	51608981	0.512451	rs3061729	6	51609015	0.597595		rs2439035	6	51438609	1	rs2495850	6	51443412	1
rs7760346	6	122645298	Novel		rs690861	6	122845589	1	rs197695	6	122845632	0.999999		rs9372688	6	122659799	0.568234						rs690861	6	122845589	1	rs197695	6	122845632	0.782918		rs4326745	6	123292508	0.642212	rs9320907	6	123293259	0.995826
rs2811688	6	134372150	Novel		rs140610497	6	134547491	1	rs116825939	6	134547370	0.487564		rs193114813	6	134796948	1	rs116247066	6	134809766	1		rs10872404	6	133628982	0.61771	rs950374	6	133631190	0.999981		rs9493885	6	134612751	0.999863	rs80158853	6	134614117	1
rs4612174	6	136462744	Known		rs4295500	6	136466328	1	rs11154854	6	136466391	1		rs4295500	6	136466328	0.999937	rs11154854	6	136466391	1		rs9389389	6	136730689	0.984348	rs12176346	6	136732664	0.996145		rs1480645	6	136437533	1	rs1564441	6	136454284	1
rs13194719	6	158971266	Known		rs11968883	6	158971411	1	rs13197977	6	158971424	1		rs11968883	6	158971411	1	rs13197977	6	158971424	1		6:159852164	6	159852164	1	rs7758822	6	159854623	1		rs2162357	6	158679830	0.200501
rs2935057	6	170454915	Known		rs2935072	6	170460912	1	rs59020521	6	170461771	0.998265		rs2935072	6	170460912	1	rs59020521	6	170461771	1		rs7751218	6	170177246	0.754126	rs60972185	6	170178196	1		rs3012417	6	170491772	1	rs11752614	6	170492386	0.996981
rs12699251	7	11679113	Known		rs2526100	7	11677778	1	rs2526096	7	11678298	0.999498		rs2526100	7	11677778	1	rs2526096	7	11678298	0.99957		rs1154921	7	11018224	0.990323	rs218965	7	11022564	1		rs6959981	7	12450939	1	rs6977850	7	12450963	1
rs2191828	7	28401455	Novel		rs10260837	7	28181129	0.999999	rs10280937	7	28182306	1		7:28396627	7	28396627	1						rs7805378	7	28393403	0.999833	rs2109815	7	28393925	0.999833		rs38519	7	28037886	1	rs38521	7	28038082	1
rs6957752	7	35961137	Novel		rs345391	7	35770990	0.999619	rs345388	7	35772982	0.999619		rs55904294	7	35933862	0.595608	rs2955285	7	35955424	0.814324		rs10226053	7	35525105	1	rs9886244	7	35525824	1		7:36843679	7	36843679	1	7:36843687	7	36843687	1
rs10248136	7	39077397	Known		rs17171519	7	39060312	0.881831	rs7801660	7	39072473	1		rs6944670	7	39057109	0.999647	rs7801660	7	39072473	1		rs73126106	7	38619253	0.999989	7:38622457	7	38622457	0.999988		rs2299130	7	39467227	0.99991	rs2299129	7	39467305	0.99992
rs59101260	7	80845529	Known		rs327640	7	80850824	1	rs327647	7	80855137	1		rs327647	7	80855137	0.982135						rs7787258	7	81126232	0.999469						rs61169730	7	81096607	1	rs60214483	7	81096705	1
rs7805468	7	82949529	Novel		rs16887442	7	82936909	1	rs4556040	7	82948171	0.998742		rs2371662	7	82957777	0.99945	rs7787838	7	82958087	1		rs13310469	7	83692482	0.986553	rs146826470	7	83695630	0.809519		rs10270140	7	82345916	1	rs10259923	7	82345995	0.652954
rs12667675	7	103624813	Known		rs73183793	7	103611360	1	rs13438204	7	103611417	0.956065		rs6967570	7	103607185	0.748023	rs4270893	7	103611839	0.748023		rs28513620	7	103477455	0.957479	rs1848959	7	103481730	0.912717		rs73183793	7	103611360	0.999982	rs13438204	7	103611417	0.776741
rs10257125	7	116162306	Known		rs6950964	7	116161671	0.999776	rs4236601	7	116162729	1		rs12540035	7	116159526	0.999605	rs6950798	7	116161585	0.5		rs11770268	7	115792898	0.626645	rs6466631	7	117551963	0.995067		rs10658477	7	115895995	0.999841
rs10230941	7	117636111	Known		rs7801876	7	117602126	1	rs10259482	7	117607658	1		rs7801876	7	117602126	1	rs10259482	7	117607658	1		rs1548461	7	117567576	0.673089						rs4391347	7	118632824	1	rs7801438	7	118634349	1
rs10237321	7	134520521	Known		rs13233583	7	134513348	1	rs4732060	7	134530381	1		rs13233583	7	134513348	1	rs4732060	7	134530381	1		rs201387230	7	134441108	0.88996	rs10233635	7	134441876	0.531202		rs12535418	7	134558806	0.641908	rs17168118	7	134576840	0.641908
rs62478245	7	151505698	Known		rs4726100	7	151503810	0.982296	rs62478243	7	151504100	0.982296		rs4726100	7	151503810	0.994905	rs62478243	7	151504100	0.994905		rs7788080	7	151594412	0.597432	rs7788961	7	151594907	0.99999		rs6947364	7	151251920	0.992347	rs6952258	7	151252599	0.992778
rs2515437	8	6377141	Novel		rs2515476	8	6388541	0.841473	rs2515477	8	6388640	0.84136		rs2442467	8	6364575	1	rs2515409	8	6364922	1		rs6988486	8	6926656	1	rs6981334	8	6926862	1		rs2700742	8	5871278	0.750597	rs2700744	8	5871385	0.750597
rs35740987	8	30454209	Novel		rs35220810	8	30452731	1	8:30454209	8	30454209	1		rs35220810	8	30452731	1	8:30454209	8	30454209	1		rs71521374	8	30031648	0.914637	rs2938192	8	30055559	0.870058		rs115455932	8	31139101	0.999235	rs114258056	8	31141317	0.978762
rs2514879	8	108273318	Known		rs2514879	8	108273318	1	rs2514881	8	108275192	1		rs2514879	8	108273318	0.824972	rs2514881	8	108275192	1		rs4595097	8	108299501	0.999717	rs4523226	8	108299893	0.887193		rs2514868	8	108267915	0.924938	rs2514879	8	108273318	1
rs62521288	8	124554317	Known		rs13270162	8	124204895	1	rs35456955	8	124207025	0.665676		rs13270162	8	124204895	1	rs35456955	8	124207025	0.686776		rs4871340	8	124056914	1	rs7013070	8	124059004	1		rs62520854	8	125196966	0.999819	rs8180885	8	125197495	0.999819
rs944801	9	22051670	Known		rs6475604	9	22052734	1	rs7030641	9	22054040	1		rs6475604	9	22052734	1	rs7030641	9	22054040	1		rs1412830	9	22043612	1	rs1412829	9	22043926	1		rs10120806	9	22047945	1	rs7027950	9	22048391	1
rs2472494	9	107695539	Known		rs2472494	9	107695539	1	rs2472493	9	107695848	1		rs2472494	9	107695539	1	rs2472493	9	107695848	1		rs2472494	9	107695539	1	rs2472493	9	107695848	1		rs735169	9	107736318	0.725887
rs61751937	9	113312231	Novel		9:113278800	9	113278800	1	rs7039613	9	113279572	1		rs10980390	9	113209424	0.994181	rs111676675	9	113232939	1		rs73540126	9	113500516	0.99996	rs113225467	9	113504676	0.99996		rs7039613	9	113279572	1
rs3829849	9	129390800	Known		rs55720446	9	129396881	1	rs10448285	9	129397014	1		rs1536907	9	129382560	1	rs55770306	9	129388033	1		rs57170229	9	129371983	1	rs72616659	9	129375888	0.999953		rs10819148	9	129126494	1	rs10987257	9	129128550	1
rs8176749	9	136131188	Known		rs79343853	9	136146310	1	rs8176644	9	136149150	1		rs10993828	9	136721668	0.992393	rs67484139	9	136722191	0.992393		rs77693339	9	136128558	0.996606						rs9411468	9	136119888	0.566176	rs9411470	9	136119985	0.999988
rs6602453	10	10840849	Novel		rs2031143	10	10846617	0.957031	rs7075064	10	10847865	1		rs2031143	10	10846617	0.959972	rs7075064	10	10847865	0.999997		rs6602460	10	10952146	0.583504	rs6602461	10	10952232	0.702856		rs66887613	10	10712958	1	rs12763880	10	10716433	1
rs1658436	10	60326910	Known		rs1593674	10	60291908	0.930208	rs1593675	10	60291694	0.720762		rs4948523	10	60339098	0.928968						10:60333593	10	60333593	0.674913	rs10826200	10	60333847	0.948734		rs765705185	10	60200420	1	rs71476373	10	60202139	0.999997
rs2637250	10	78282063	Known		rs724113	10	78557309	1	rs2583066	10	78555839	0.36091		rs2579744	10	78311824	0.999956	rs2637254	10	78312002	0.999956		rs9416080	10	77340118	0.341551						rs11001625	10	77895147	1	rs10824371	10	77895222	1
rs10882167	10	94929116	Known		rs11187315	10	94944863	1	rs57346439	10	94945557	0.565852		rs117531235	10	94928179	0.991463	rs112204175	10	94928411	0.851237		rs835247	10	94744904	0.603928						rs7910061	10	94963111	0.978331	rs12573551	10	95715518	1
rs57866767	10	96023077	Known		rs57866767	10	96023077	1	rs11187838	10	96038686	1		rs57866767	10	96023077	1	rs11187838	10	96038686	1		rs7072099	10	96036230	0.997406	rs2274225	10	96039708	0.997406		rs11815169	10	95718600	1
rs72837408	10	115546535	Novel		rs2419867	10	115550540	0.995491	rs2419865	10	115550706	1		rs7902084	10	115547965	0.999491	rs7918841	10	115548244	0.997626		rs3758590	10	115310563	0.65545						rs7896823	10	116132681	1	rs11196715	10	116133549	1
rs10430737	10	126278648	Known		rs34496154	10	126284336	1	rs61870251	10	126284415	1		rs10901823	10	126488660	0.818232	rs12049662	10	126500187	1		rs7083646	10	126260639	0.999206	rs12780587	10	126261089	0.812413		rs4962463	10	127184196	1	rs3858293	10	127186181	0.646716
rs4141194	11	17011176	Known		rs12575487	11	17019317	0.999998	rs778624773	11	17020505	0.999998		rs11024102	11	17008605	1	rs4141194	11	17011176	1		rs34927905	11	17001427	0.999998	rs11024101	11	17005544	0.52693		rs6486302	11	16637120	1	rs7117253	11	16637583	1
rs7111873	11	47469439	Known		rs4752836	11	47465095	0.983189	rs4752837	11	47465955	0.983189		rs142960070	11	47291817	1	11:47337720	11	47337720	0.876586		rs6485788	11	47873883	1	rs4752877	11	47886165	0.947334		rs74364480	11	46663438	0.60972	rs77863447	11	46699776	1
rs1346	11	65337251	Known		rs34512931	11	65224560	1	11:65225475	11	65225475	1		rs34512931	11	65224560	1	11:65225475	11	65225475	1		rs111816352	11	64965276	1	rs1195732	11	64969146	1		rs10897525	11	64552946	1	11:64571497	11	64571497	1
rs10792871	11	86368106	Known		rs686768	11	86361508	1	rs10792871	11	86368106	0.999998		rs686768	11	86361508	1	rs10792871	11	86368106	0.99999		rs539939	11	86372190	1	rs627684	11	86373139	0.631728		rs11602721	11	86500316	1	rs750789	11	86502292	0.994467
rs7120067	11	102064834	Novel		rs12420287	11	102066226	1	rs12421242	11	102066240	1		rs12420287	11	102066226	1	rs12421242	11	102066240	1		rs4475891	11	102096282	0.740986	rs7124247	11	102096416	0.744871		rs1004352	11	101777151	1	rs1661410	11	101778710	0.664651
rs10444329	11	115039683	Novel		rs17116680	11	114088458	1	rs17116686	11	114088686	1		rs17116680	11	114088458	1	rs17116684	11	114088541	0.993514		rs4936330	11	115502529	rs10891877	0.57403	11	115502502	0.5		rs10891771	11	114775992	0.999988	rs2513496	11	114796811	0.999988
rs1893261	11	120198093	Known		rs76693355	11	120292477	1	rs11217863	11	120293138	1		rs76693355	11	120292477	1	rs11217863	11	120293138	1		rs479160	11	120850004	0.999952	11:120850682	11	120850682	0.999952		rs7924772	11	120233626	0.999995	rs6589810	11	120233908	0.999995
rs7924522	11	128380742	Known		rs7924522	11	128380742	1	rs7108992	11	128381867	1		rs7924522	11	128380742	1	rs7946009	11	128387422	0.999569		rs7121743	11	128487069	1	rs2187461	11	128487814	0.754461		rs553706	11	128062553	0.999997	rs487789	11	128062646	0.789065
rs2875238	11	130282078	Known		rs3740888	11	130278210	1	rs7936928	11	130279168	1		rs3740888	11	130278210	1	rs7936928	11	130279168	1		rs4936098	11	130280667	0.972524	rs4936099	11	130280725	0.999999		rs58246032	11	129822183	1	rs80108029	11	129826612	1
rs7972874	12	28203245	Novel		rs11611940	12	28200238	1	rs11614036	12	28200312	1		rs11611940	12	28200238	1	rs11614036	12	28200312	1		rs11049255	12	28135989	0.806035						rs775268333	12	29101427	0.671772	rs11049947	12	29106455	0.877276
rs324788	12	83948055	Known		rs324766	12	83967522	0.975228	rs682068	12	83995021	0.979397		rs324788	12	83948055	0.897454	rs682068	12	83995021	0.999689		rs17010563	12	83447538	0.774372	rs17010565	12	83450284	0.919357		rs12578893	12	83424175	0.999957	rs66759950	12	83426267	1
rs1037013	12	107219308	Known		rs10861645	12	107071130	1	rs1922433	12	107077172			rs10778504	12	107120424	0.971256	rs10861654	12	107122896	0.710517		rs10778504	12	107120424	0.971256	rs10861654	12	107122896	0.710517		rs11834252	12	106355641	0.724557	rs73393255	12	106356398	0.698068
rs7137828	12	111932800	Known		rs3184504	12	111884608	1	rs7137828	12	111932800	1		rs3184504	12	111884608	1	rs7137828	12	111932800	1		rs10849935	12	111767891	0.751011	rs6490056	12	111769292	0.751011		rs10744766	12	111266677	1	rs1476470	12	111267031	1
rs4769194	13	22673870	Known		rs1570456	13	22668605	0.999974	rs1570457	13	22668807	1		rs9552591	13	22658495	1	rs9550811	13	22658646	1		rs6490727	13	22916613	0.999991	rs12876772	13	22926649	0.860912		rs73164729	13	23648288	0.882547	rs55872545	13	23648893	1
rs9530143	13	73639371	Known		rs9530143	13	73639371	1	rs4885062	13	73645996	1		rs9530143	13	73639371	1						rs74966965	13	73195158	0.992623	rs17089630	13	73195216	0.992623		rs12867325	13	73860401	0.85394	rs9564963	13	73860795	0.554975
rs9544024	13	76258720	Known		rs9544024	13	76258720	0.825147	rs9544025	13	76259255	0.994977		rs9565181	13	76252858	0.999999						rs561270	13	75790394	1	rs140584188	13	75790723	1		rs7323198	13	76828349	0.999256	rs61232401	13	76843748	1
rs2218471	13	110777939	Known		rs7999378	13	110895756	0.88596	rs11842085	13	110896290	0.871501		rs11843610	13	110896282	0.690212	rs11842085	13	110896290	0.5		rs55876229	13	110737501	0.999988	rs61963048	13	110738001	0.999988		rs112271748	13	110357926	1	rs3895404	13	110358789	1
rs12433661	14	53960089	Known		rs12147440	14	53955742	1	rs1954317	14	53958972	0.879995		rs17125973	14	53415359	0.5	rs28365937	14	53418233	1		rs2250947	14	53987457	0.995087	rs2251294	14	53990568	0.527975		rs1255326	14	53814106	1
rs33912345	14	60976537	Known		rs2351174	14	61013237	1	rs1955695	14	61021891	1		rs2351174	14	61013237	1	rs1955695	14	61021891	1		rs7159392	14	61008596	0.99998	rs2351174	14	61013237	1		rs10673037	14	61667481	0.999953	rs200332023	14	61667485	0.999953
rs754458	14	75084829	Known		rs11159096	14	75098313	1	rs4903254	14	75100485	1		rs11159096	14	75098313	0.999861	rs4903254	14	75100485	1		rs9323614	14	76030941	1	rs7159570	14	76031313	1		rs4903301	14	75740388	0.999838	rs9323607	14	75742559	0.999988
rs4903352	14	76371658	Novel		rs11159159	14	76403960	0.509424	rs2019207	14	76405298	1		rs10141731	14	76521772	0.940266	rs2111783	14	76544462	1		rs9323614	14	76030941	1	rs7159570	14	76031313	1		rs2165197	14	75079704	0.96674	rs754458	14	75084829	0.965995
rs72692789	14	95956875	Novel		rs141100107	14	95964580	0.999896	rs79484719	14	95964846	0.509424		14:95958058	14	95958058	1	rs72692790	14	95959897	1		rs56831535	14	95365353	0.994873	rs57468142	14	95365455	0.541805		rs4900243	14	95162551	1	rs7144373	14	95163831	1
rs2431023	15	57553832	Known		rs2593234	15	57543239	0.999965	rs1867638	15	57544038	1		rs2593234	15	57543239	1	rs1867638	15	57544038	0.999833		rs74403339	15	58550318	0.989149	rs4471613	15	58551694	0.516846		rs8043301	15	57167065	1	rs57452003	15	57169531	1
rs12438742	15	61947280	Known		rs11852569	15	61966513	0.998131	rs2253095	15	61966724	0.999372		rs11852569	15	61966513	0.98059	rs2253095	15	61966724	1		rs17303740	15	62076483	0.841716	rs77763799	15	62078068	1		rs16943536	15	61317294	1	rs72625742	15	61317300	1
rs2439386	15	67025403	Novel		rs11857194	15	66989515	1	rs7497064	15	66990159	1		rs2439386	15	67025403	0.983746						rs79988304	15	67032773	0.875535	rs77498894	15	67034941	0.875535		rs11857194	15	66989515	0.99994	rs7497064	15	66990159	0.99994
rs1550437	15	74221298	Known		rs8034403	15	74222028	1	rs8034017	15	74222043	1		rs8034403	15	74222028	0.896322	rs8034017	15	74222043	1		rs5813732	15	74223620	1	rs3056314	15	74223621	1		rs11072473	15	74344678	1	rs11072475	15	74345103	0.537952
rs8038628	15	92331707	Novel		rs6496865	15	92334756	0.999999	rs7170193	15	92340080	1		rs8038628	15	92331707	1	rs12440455	15	92332539	1		rs1563367	15	93114282	0.597858						rs34289565	15	93092632	0.512078	rs1378598	15	93096814	0.997859
rs114367221	16	51601948	Known		rs8055984	16	51600580	0.869636	rs77958218	16	51600174	0.999999		rs8055984	16	51600580	0.766729	rs77958218	16	51600174	0.5		rs56172103	16	51337556	0.994513	rs58164523	16	51339938	0.680512		rs12149211	16	51961345	1	rs8060451	16	51963654	1
rs190157577	16	59995564	Novel		rs4608322	16	59014391	1	rs150400589	16	59016204	0.609409		rs12927372	16	59124259	1	rs11641272	16	59127241	1		rs8053280	16	59722672	0.731639	rs8051651	16	59722749	0.512882		rs9937984	16	60367131	1	rs9925334	16	60367206	0.999636
rs12447201	16	65067443	Known		rs12920174	16	65071826	0.999996	rs1520230	16	65072278	0.616133		rs12920174	16	65071826	0.899652	rs1879260	16	65076929	0.880231		rs201385026	16	65272973	0.999935	rs200009242	16	65272979	0.999935		rs2113178	16	65227242	0.763653	rs2113179	16	65227305	0.763653
rs280875	16	77661732	Known		rs12444340	16	77610294	1	rs12443872	16	77611912	0.999996		rs12444340	16	77610294	1	rs79473335	16	77614785	0.717251		rs72794038	16	78378661	0.496525	rs9940114	16	78378724	0.496529		rs4888701	16	78000408	0.981113	rs4888702	16	78000420	0.722673
rs216197	17	2201944	Known		rs8082546	17	2155343	0.937654	rs35691028	17	2160581	0.999931		rs452363	17	2194028	0.909474	rs216206	17	2196088	0.79677		rs4349181	17	2040963	0.679946	rs771524961	17	2069682	0.808708		rs2131703	17	2025360	1	rs2131702	17	2025458	1
rs9913911	17	10031183	Known		rs9893168	17	10031571	1	rs9914258	17	10031642	0.937654		rs9893168	17	10031571	0.998518	rs9914258	17	10031642	0.998518		rs9893168	17	10031571	1	rs9914258	17	10031642	1		rs3786079	17	9906749	1
rs242559/rs114919114	17	44025888	Novel		rs439945	17	43726659	1	rs417968	17	43728376	1		rs439945	17	43726659	0.999951	rs1724409	17	43740565	0.813578		rs57989921	17	43331177	0.56438	rs8065345	17	43332015	1		rs73984616	17	43881290	1	rs7222658	17	43882035	1
rs1348518145	17	45695242	Novel		rs9905922	17	45740805	1	rs4239163	17	45755954	1		rs199525	17	44847834	1	rs199516	17	44856485	1		17:45701027	17	45701027	0.509023	rs11444334	17	45720627	0.634554		rs8082284	17	45647067	0.627804
rs11868441	17	59239221	Known		rs4968530	17	59242266	1	rs4968531	17	59242442	0.763005		rs11658334	17	58830188	0.755471	rs11658417	17	58830328	0.967021		rs16944768	17	59112306	0.362733	rs7210912	17	59113383	0.362733		rs7222210	17	59205829	0.999999	rs16944865	17	59212312	1
rs2326788	20	6470094	Known		rs2326788	20	6470094	1	rs6140010	20	6473123	1		rs2326788	20	6470094	0.9999	rs6140010	20	6473123	0.9999		rs75318189	20	6603635	0.56316	rs4142039	20	6610854	0.56414		rs11087730	20	6429185	1	rs6038503	20	6430138	1
rs6101546	20	38074218	Known		rs6093178	20	38065613	0.999996	rs6101540	20	38071003	1		rs4810269	20	38142828	0.995791	rs4810270	20	38143156	0.995791		rs6129247	20	37943619	0.595854	20:37944263	20	37944263	0.59604		rs62202473	20	37392242	1	rs73104045	20	37407515	0.741792
rs6124885	20	45534053	Novel		rs1475712	20	45492024	0.999082	rs1475711	20	45492236	1		rs6124881	20	45518916	1	rs12626009	20	45519842	1		rs6012072	20	45541630	0.996737	rs6122535	20	45543036	1		rs6094551	20	45636255	1	rs7265597	20	45647279	1
rs13049669	21	27216839	Novel		rs73161749	21	27057957	0.997493	rs11087972	21	27058726	1		rs73161749	21	27057957	1	rs11087973	21	27060985	0.837841		rs6516709	21	27265707	1	rs1782974	21	27266055	1		rs11701219	21	27255755	0.998985	rs11701375	21	27255798	0.998985
rs13050568	21	40406630	Novel		rs722792	21	40404973	1	rs13050568	21	40406630	0.997493		rs2836860	21	40423964	1	rs2410100	21	40424619	0.957608		rs2836555	21	39973752	0.995455	rs73217983	21	39982340	0.942909		rs56180262	21	39805503	0.560769	rs2836392	21	39805875	0.999988
rs8141610	22	19870147	Known		rs1139795	22	19867771	1	rs45465601	22	19868678	1		rs1139795	22	19867771	1	rs45465601	22	19868678	1		rs175204	22	20169094	0.879047						rs1206544	22	19215039	0.550515	rs9605972	22	19253274	0.999935
rs5752776	22	29108229	Known		rs5752775	22	29107195	0.999992	rs5752776	22	29108229	1		rs5752775	22	29107195	0.996461	rs5752776	22	29108229	0.996461		rs132362	22	29598878	0.953551	rs132364	22	29599089	0.999995		rs17878936	22	29132338	1	rs16986656	22	29132458	1
rs5750494	22	38176979	Known		rs12160491	22	38195796	1	rs12160528	22	38195819	0.999992		rs1006139	22	38118805	1	rs12628603	22	38119213	1		rs5995498	22	38196573	0.999984	rs7286550	22	38196760	0.999984		rs2032476	22	37386057	0.92796	rs713829	22	37386920	1
rs12846405	23	3329593	Novel		rs60334954	23	3280113	1	rs7055099	23	3279776	0.612216		rs5939176	23	3214312	0.772336	rs5939483	23	3213582	0.701627		rs806611	23	3304763	0.999168	rs806613	23	3305735	0.584886		NA	NA	NA	NA	NA	NA	NA	NA
rs66819623	23	13954397	Novel		rs55943282	23	13950270	1	rs6654096	23	13950855	1		rs55943282	23	13950270	1	rs6654096	23	13950855	1		rs16979478	23	14229914	0.583072	rs58577089	23	14216750	0.563402		NA	NA	NA	NA	NA	NA	NA	NA
rs17146835	23	43940827	Novel		rs4824671	23	43942258	1	rs5952480	23	43944713	1		rs4824671	23	43942258	1	rs5952480	23	43944713	1		rs643988	23	44643608	0.615363	rs628924	23	44642531	0.475027		NA	NA	NA	NA	NA	NA	NA	NA
rs12013156	23	109786110	Novel		rs5942995	23	109855729	0.490787	rs7063103	23	109849421	0.452717		rs5943005	23	109867987	0.864485	rs6567883	23	109869935	0.664547		rs5942926	23	109672958	1	rs17320750	23	109680113	1		NA	NA	NA	NA	NA	NA	NA	NA
Posterior probability of a finding a causal SNP for EURs improves after including ASN and AFR ancestries (improvements from probabilities <0.9 to >0.9 or from <0.8 to >0.8 ) (N=10 loci). The best causal SNP may or may not remain the same after combining ancestries.
Posterior probability of a SNP being causal in EURs alone is already high (>0.9 at least for one SNP), but there is a slight improvement after including ASN and AFR ancestries (N=8 loci). The best causal SNP may or may not remain the same after combining ancestries.
Posterior probability of a SNP being causal in EURs is >0.8, but declines to <0.8 after including ASN and AFR ancestries (N=3 loci).
For the rest, posterior probability of identifying a causal SNP in EURs does not change much after including ASN and AFR ancestries although the best causal SNP may or may not remain the same.
For 75 loci, at least one same SNP remains the best causal SNP in both fine-mapping using EUR data alone and fine-mapping across ancestries (SNPs in bold blue). For the rest (52 loci), the best causal SNPs change.
23 lead SNPs identified in the meta-analysis remain as the best causal SNP after cross-ancestry fine-mapping (SNPs In bold red). For the rest, the best causal SNPs are not the same after cross-ancestry fine-mapping .

[truncated: 15 more sheets: Supplementary Data 11, Supplementary Data 12, Supplementary Data 13, Supplementary Data 14, Supplementary Data 15, Supplementary Data 16, Supplementary Data 17, Supplementary Data 18, Supplementary Data 19, Supplementary Data 20, Supplementary Data 21, Supplementary Data 22, Supplementary Data 23, Supplementary Data 24, Supplementary Data 25]
